# Supplementary material for: Transcriptome Analysis and Identification of Differentially Expressed Transcripts of Immune-Related Genes in Spleen of Gosling and Adult Goose
Source: Int J Mol Sci. 2015 Sep 22;16(9):22904–26. doi: 10.3390/ijms160922904 (PMC4613342; doi:10.3390/ijms160922904)
Supplement: Supplementary file 1 [file ijms-16-22904-s001.xlsx]

## Sheet: Figure S1
Figure S1. The interaction between cytokines and cytokine receptors.

## Sheet: Table S1
Table S1. Primers used for qRT-PCR analysis.
Unigene ID	Gene symbol	Primer sequence (5’-3’)	Size/bp
CL1203Contig2	TNFRSF13B	F: AGAAGCAGCTGTGTTTTG	120
		R: TGGCCATTTTAAGATCAT
CL34468Contig1	CCL4	F: CAGCCCTCGTGTTCATCA	116
		R: CTTCCCATCTGGCTTTGCT
CL36733Contig1	CXCR4	F: CTGGATCTGTCCTCCGGGT	87
		R: GTCTCCATAGTCTCCGTAG
CL6275Contig1	IL2RA	F: ACTGAGCCAGGTGAGGTT	83
		R: CTGAGTTGGTGGGGTGTG
comp93267_c1_seq1	MHCⅠα	F: GAGCAAGCAGGGGAAGGA	100
		R: CCGTTAGACACTGGGGTT
CL45933Contig1	TAP2	F: TCTTCCAGCAGACCACAGC	188
		R: AAGGGGCACCTCAAGCAG
CL22500Contig1	IgH	F: GAGCCCATCGTCAAGTCCA	107
		R: GCGTTCTGGCTGAGGTAG

## Sheet: Table S2
Table S2. The differentially expressed unigenes between the gosling and the adult goose
ID	baseMean	baseMean_Sample_WGC023801_2WSP	baseMean_Sample_WGC023801_ADSP	foldChange	log2FoldChange	pval	padj	up_down	NR.id.and.Des	NR.e.value	swiss.id	swiss.e.value	swiss.Des	KOG.id	KOG.e.value	KOG.Des	kegg	GO.id	GO.term
CL10013Contig1	40.9648	16.5084	65.4212	3.9629	1.98656	0.0332108	0.777692	Up
CL10042Contig1	32.4993	13.2067	51.7918	3.92162	1.97145	0.0452036	0.885449	Up
CL10046Contig1	47.5621	8.80449	86.3196	9.80405	3.29338	0.000821864	0.0821064	Up
CL10065Contig1	9.63656	1.10056	18.1726	16.5121	4.04545	0.0349682	0.798886	Up
CL10070Contig1	23.3619	2.20112	44.5228	20.2273	4.33823	0.00105131	0.0983885	Up
CL10105Contig1	40.4339	0	80.8679	Inf	Inf	7.01013e-07	0.000286965	Up
CL10158Contig1	38.0215	8.80449	67.2384	7.63684	2.93298	0.00351399	0.218976	Up
CL10160Contig1	49.6927	17.609	81.7765	4.64402	2.21538	0.0148938	0.515408	Up
CL10244Contig1	350.088	174.989	525.187	3.00125	1.58556	0.0137144	0.496422	Up
CL10250Contig1	13.9173	3.30168	24.5329	7.43044	2.89345	0.0420163	0.854721	Up
CL10290Contig1	31.3987	11.0056	51.7918	4.70594	2.23448	0.0265655	0.706603	Up
CL10305Contig1	22.9076	2.20112	43.6141	19.8145	4.30848	0.0011932	0.107668	Up
CL1031Contig1	27.2843	5.5028	49.0659	8.91652	3.15648	0.00487879	0.276991	Up	gi|513184952|ref|XP_004936245.1|PREDICTED: actin-binding LIM protein 2 isoform X9 [Gallus gallus]	0	sp|Q6H8Q1|ABLM2_HUMAN	0	Actin-binding LIM protein 2 OS=Homo sapiens GN=ABLIM2 PE=1 SV=2	KOG1044	1e-151	Actin-binding LIM Zn-finger protein Limatin involved in axon guidance	ko04360, Axon guidance;	GO:0007411;GO:0008270;GO:0005730;GO:0045944;GO:0030016;GO:0007010;GO:0045111;GO:0003779;GO:0015629	axon guidance|zinc ion binding|nucleolus|positive regulation of transcription from RNA polymerase II promoter|myofibril|cytoskeleton organization|intermediate filament cytoskeleton|actin binding|actin cytoskeleton
CL10346Contig1	18.1726	0	36.3451	Inf	Inf	0.000272578	0.0366967	Up	gi|483517667|gb|EOB04112.1|hypothetical protein Anapl_00137 [Anas platyrhynchos]	1.14346e-08
CL10356Contig1	172.446	75.9387	268.954	3.54172	1.82445	0.0128666	0.477412	Up	gi|483525505|gb|EOB09102.1|Protein FAM149A, partial [Anas platyrhynchos]	0	sp|Q8CFV2|F149A_MOUSE	2e-164	Protein FAM149A OS=Mus musculus GN=Fam149a PE=2 SV=1
CL10366Contig1	445.973	258.632	633.313	2.44871	1.29202	0.0348379	0.798781	Up	gi|514769464|ref|XP_005025166.1|PREDICTED: DNA repair protein complementing XP-C cells [Anas platyrhynchos]	0	sp|Q01831|XPC_HUMAN	7e-172	DNA repair protein complementing XP-C cells OS=Homo sapiens GN=XPC PE=1 SV=4	KOG2179	2e-172	Nucleotide excision repair complex XPC-HR23B, subunit XPC/DPB11	ko03420, Nucleotide excision repair;	GO:0003684;GO:0010224;GO:0031573;GO:0003697;GO:0005737;GO:0071942;GO:0000715	damaged DNA binding|response to UV-B|intra-S DNA damage checkpoint|single-stranded DNA binding|cytoplasm|XPC complex|nucleotide-excision repair, DNA damage recognition
CL10423Contig1	21.8071	0	43.6141	Inf	Inf	7.9163e-05	0.0147627	Up
CL10440Contig1	330.956	163.984	497.928	3.03645	1.60239	0.0137081	0.496422	Up	gi|514747254|ref|XP_005019877.1|PREDICTED: dickkopf-related protein 2 isoform X1 [Anas platyrhynchos] >gi|483512874|gb|EOB01163.1| Dickkopf-related protein 2, partial [Anas platyrhynchos]	1.56377e-152	sp|Q9QYZ8|DKK2_MOUSE	3e-136	Dickkopf-related protein 2 OS=Mus musculus GN=Dkk2 PE=1 SV=2	KOG1218	1e-136	Proteins containing Ca2+-binding EGF-like domains	ko04310, Wnt signaling pathway;	GO:0005615;GO:0007275;GO:0090090;GO:0090263	extracellular space|multicellular organismal development|negative regulation of canonical Wnt signaling pathway|positive regulation of canonical Wnt signaling pathway
CL10490Contig1	32.1154	8.80449	55.4263	6.29523	2.65426	0.00984223	0.414294	Up
CL1049Contig1	111.505	23.1118	199.898	8.64919	3.11256	0.00019703	0.0290402	Up
CL10509Contig1	59.1884	27.514	90.8628	3.30242	1.72352	0.0461645	0.890888	Up
CL10514Contig1	120.169	49.5252	190.812	3.85282	1.94591	0.012406	0.466161	Up
CL1057Contig1	124.161	48.4247	199.898	4.12802	2.04545	0.00852854	0.38733	Up
CL1063Contig1	131.411	63.8325	198.989	3.11737	1.64033	0.0307661	0.753089	Up	gi|483500317|gb|EOA94719.1|hypothetical protein Anapl_14764 [Anas platyrhynchos]	9.48003e-08
CL10669Contig1	331.826	194.799	468.852	2.40685	1.26714	0.0490741	0.924655	Up
CL10720Contig1	35.558	6.60337	64.5126	9.76965	3.28831	0.0017399	0.13818	Up
CL10730Contig1	31.6611	8.80449	54.5177	6.19203	2.63041	0.010702	0.432868	Up
CL10760Contig1	803.412	471.04	1135.78	2.41123	1.26977	0.023107	0.649818	Up	gi|449510008|ref|XP_002193984.2|PREDICTED: translocation protein SEC62-like [Taeniopygia guttata]	9.84536e-45	sp|Q5F3A1|SEC62_CHICK	3e-50	Translocation protein SEC62 OS=Gallus gallus GN=SEC62 PE=2 SV=1	KOG2927	2e-48	Membrane component of ER protein translocation complex	ko03060, Protein export;ko04141, Protein processing in endoplasmic reticulum;	GO:0005789;GO:0045111;GO:0016235;GO:0008565;GO:0016021;GO:0015031	endoplasmic reticulum membrane|intermediate filament cytoskeleton|aggresome|protein transporter activity|integral component of membrane|protein transport
CL107Contig1	101.772	20.9107	182.634	8.73402	3.12665	0.000232825	0.0329298	Up
CL10873Contig1	38.5013	14.3073	62.6953	4.38205	2.13161	0.0251833	0.681356	Up
CL10890Contig1	33.2159	11.0056	55.4263	5.03618	2.33233	0.0194457	0.604212	Up
CL10904Contig1	22.3829	6.60337	38.1624	5.77923	2.53088	0.0267789	0.70668	Up	gi|483525046|gb|EOB08797.1|EMILIN-2, partial [Anas platyrhynchos]	1.02628e-88	sp|Q8K482|EMIL2_MOUSE	5e-76	EMILIN-2 OS=Mus musculus GN=Emilin2 PE=1 SV=1					GO:0005576	extracellular region
CL10926Contig1	24.3921	8.80449	39.9796	4.54082	2.18295	0.0442854	0.878852	Up
CL10927Contig1	22.095	3.30168	40.8882	12.3841	3.63041	0.00391167	0.236727	Up
CL10990Contig1	46.4166	16.5084	76.3247	4.62338	2.20895	0.0164355	0.545847	Up
CL1099Contig1	130.144	64.9331	195.355	3.00856	1.58907	0.0363436	0.804503	Up	gi|514751252|ref|XP_005020816.1|PREDICTED: B2 bradykinin receptor isoform X1 [Anas platyrhynchos] >gi|514751255|ref|XP_005020817.1| PREDICTED: B2 bradykinin receptor isoform X2 [Anas platyrhynchos] >gi|483511719|gb|EOB00468.1| B2 bradykinin receptor, partial [Anas platyrhynchos]	0	sp|P30411|BKRB2_HUMAN	6e-126	B2 bradykinin receptor OS=Homo sapiens GN=BDKRB2 PE=1 SV=2	KOG3656	5e-63	FOG: 7 transmembrane receptor	ko04810, Regulation of actin cytoskeleton;ko04020, Calcium signaling pathway;ko04022, cGMP - PKG signaling pathway;ko04080, Neuroactive ligand-receptor interaction;ko05142, Chagas disease (American trypanosomiasis);ko04961, Endocrine and other factor-regulated calcium reabsorption;ko04610, Complement and coagulation cascades;ko04750, Inflammatory mediator regulation of TRP channels;	GO:0016021;GO:0009651;GO:0005768;GO:0050482;GO:0002020;GO:0033137;GO:0006939;GO:0042310;GO:0046982;GO:0004947;GO:0031702;GO:0007186;GO:0043066;GO:0042311;GO:0005886	integral component of membrane|response to salt stress|endosome|arachidonic acid secretion|protease binding|negative regulation of peptidyl-serine phosphorylation|smooth muscle contraction|vasoconstriction|protein heterodimerization activity|bradykinin receptor activity|type 1 angiotensin receptor binding|G-protein coupled receptor signaling pathway|negative regulation of apoptotic process|vasodi…
CL11005Contig1	430.649	187.095	674.202	3.60352	1.84941	0.00313655	0.203516	Up	gi|483510961|gb|EOB00004.1|Putative transcription factor PML [Anas platyrhynchos]	0	sp|P29590|PML_HUMAN	9e-33	Protein PML OS=Homo sapiens GN=PML PE=1 SV=3	KOG2177	7e-34	Predicted E3 ubiquitin ligase	ko04144, Endocytosis;ko04120, Ubiquitin mediated proteolysis;ko05200, Pathways in cancer;ko05202, Transcriptional misregulation in cancers;ko05221, Acute myeloid leukemia;ko05164, Influenza A;ko05168, Herpes simplex infection;	GO:0007179;GO:0031065;GO:0006461;GO:0032938;GO:0042803;GO:0030578;GO:0016525;GO:0007184;GO:0001932;GO:2000059;GO:0016363;GO:0010332;GO:0031625;GO:0043161;GO:0016605;GO:0007182;GO:0051974;GO:0045892;GO:0006977;GO:0005829;GO:0045930;GO:0032183;GO:0010522;GO:0032469;GO:0045343;GO:0001666;GO:0009411;GO:0030099;GO:0003713;GO:0006919;GO:0048384;GO:0008270;GO:0032211;GO:0007050;GO:0045165;GO:0008285;GO:…	transforming growth factor beta receptor signaling pathway|positive regulation of histone deacetylation|protein complex assembly|negative regulation of translation in response to oxidative stress|protein homodimerization activity|PML body organization|negative regulation of angiogenesis|SMAD protein import into nucleus|regulation of protein phosphorylation|negative regulation of protein ubiquitin…
CL11030Contig1	34.291	7.70393	60.878	7.90221	2.98226	0.00394893	0.238271	Up
CL11043Contig1	36.3257	15.4079	57.2435	3.71522	1.89345	0.0471164	0.903755	Up
CL11060Contig1	41.2976	9.90505	72.6902	7.3387	2.87553	0.00342091	0.215308	Up
CL11084Contig1	50.147	17.609	82.6851	4.69562	2.23132	0.0141157	0.496422	Up
CL11102Contig1	23.3875	7.70393	39.071	5.07157	2.34243	0.0350725	0.798886	Up
CL11109Contig1	13.9173	3.30168	24.5329	7.43044	2.89345	0.0420163	0.854721	Up
CL1112Contig1	51.8877	1.10056	102.675	93.2933	6.5437	7.4773e-07	0.000303621	Up
CL11130Contig1	27.1179	8.80449	45.4314	5.16003	2.36738	0.0255676	0.690272	Up
CL11142Contig1	10.4492	0	20.8984	Inf	Inf	0.00600958	0.315164	Up
CL11145Contig1	29.364	3.30168	55.4263	16.7873	4.0693	0.000632599	0.0692435	Up
CL11180Contig1	13.2711	1.10056	25.4416	23.1169	4.53088	0.00840489	0.383878	Up
CL11232Contig1	80.2022	13.2067	147.198	11.1457	3.47841	0.0001274	0.0213823	Up
CL11297Contig1	39.9796	0	79.9592	Inf	Inf	7.66304e-07	0.000306223	Up
CL11380Contig1	2783.28	1835.74	3730.82	2.03233	1.02314	0.0358758	0.800701	Up	gi|483507929|gb|EOA98274.1|Mediator of RNA polymerase II transcription subunit 12-like protein, partial [Anas platyrhynchos]	0	sp|Q86YW9|MD12L_HUMAN	0	Mediator of RNA polymerase II transcription subunit 12-like protein OS=Homo sapiens GN=MED12L PE=1 SV=2	KOG3598	0	Thyroid hormone receptor-associated protein complex, subunit TRAP230	ko04919, Thyroid hormone signaling pathway;	GO:0001104;GO:0016592;GO:0006357;GO:0008013	RNA polymerase II transcription cofactor activity|mediator complex|regulation of transcription from RNA polymerase II promoter|beta-catenin binding
CL11397Contig1	12.3624	1.10056	23.6243	21.4657	4.42396	0.0118478	0.452616	Up
CL11399Contig1	325.069	148.576	501.562	3.3758	1.75523	0.00740307	0.353084	Up
CL11407Contig1	39.6723	12.1062	67.2384	5.55406	2.47354	0.0103485	0.424312	Up
CL11437Contig1	10.4492	0	20.8984	Inf	Inf	0.00600958	0.315164	Up	gi|514705552|ref|XP_005009885.1|PREDICTED: T-cell surface glycoprotein CD1b-2-like isoform X1 [Anas platyrhynchos]	6.09695e-116	sp|P23043|CD1D_SYLFL	2e-31	Antigen-presenting glycoprotein CD1d (Fragment) OS=Sylvilagus floridanus GN=CD1D PE=2 SV=2				ko04640, Hematopoietic cell lineage;	GO:0048007;GO:0071723;GO:0006955;GO:0030881;GO:0030883;GO:0005886;GO:0030884	antigen processing and presentation, exogenous lipid antigen via MHC class Ib|lipopeptide binding|immune response|beta-2-microglobulin binding|endogenous lipid antigen binding|plasma membrane|exogenous lipid antigen binding
CL11569Contig1	28.4554	3.30168	53.609	16.2369	4.0212	0.000782357	0.0797418	Up
CL115Contig1	231.398	111.157	351.639	3.16345	1.6615	0.0167087	0.552035	Up
CL11641Contig1	19.5355	0	39.071	Inf	Inf	0.000169024	0.0264301	Up
CL11691Contig1	7.72333	0	15.4467	Inf	Inf	0.0222382	0.642775	Up
CL11703Contig1	52.4891	13.2067	91.7714	6.94883	2.79677	0.00271767	0.184889	Up
CL11721Contig1	36.3961	11.0056	61.7867	5.61411	2.48906	0.0114935	0.446189	Up	gi|514724356|ref|XP_005014667.1|PREDICTED: endothelin B receptor-like protein 2 [Anas platyrhynchos]	0	sp|O60883|ETBR2_HUMAN	0	Prosaposin receptor GPR37L1 OS=Homo sapiens GN=GPR37L1 PE=1 SV=2	KOG3656	0	FOG: 7 transmembrane receptor		GO:0016021;GO:0007186;GO:0004930	integral component of membrane|G-protein coupled receptor signaling pathway|G-protein coupled receptor activity
CL11747Contig1	142.839	59.4303	226.248	3.80695	1.92864	0.0109342	0.438815	Up
CL11752Contig1	105.01	52.8269	157.193	2.97561	1.57319	0.0447026	0.883792	Up
CL11774Contig1	81.4437	6.60337	156.284	23.6673	4.56482	3.67473e-06	0.00121728	Up	gi|449495454|ref|XP_002191900.2|PREDICTED: uncharacterized protein LOC100228131 [Taeniopygia guttata]	2.34911e-123	sp|P63133|POK6_HUMAN	9e-94	HERV-K_8p23.1 provirus ancestral Pol protein OS=Homo sapiens PE=3 SV=1	KOG0017	4e-42	FOG: Transposon-encoded proteins with TYA, reverse transcriptase, integrase domains in various combinations	ko04740, Olfactory transduction;	GO:0003723;GO:0006310;GO:0008270;GO:0006278;GO:0005730;GO:0003964;GO:0004523;GO:0003677;GO:0019031;GO:0005198;GO:0005737;GO:0015074;GO:0051028	RNA binding|DNA recombination|zinc ion binding|RNA-dependent DNA replication|nucleolus|RNA-directed DNA polymerase activity|RNA-DNA hybrid ribonuclease activity|DNA binding|viral envelope|structural molecule activity|cytoplasm|DNA integration|mRNA transport
CL11785Contig1	28.6728	11.0056	46.34	4.21058	2.07402	0.0430331	0.863938	Up
CL11799Contig1	28.4554	3.30168	53.609	16.2369	4.0212	0.000782357	0.0797418	Up	gi|483519714|gb|EOB05407.1|hypothetical protein Anapl_04616 [Anas platyrhynchos]	8.57245e-13
CL11924Contig1	94.9383	36.3185	153.558	4.22809	2.08001	0.0104086	0.426085	Up	gi|514751757|ref|XP_005020940.1|PREDICTED: transforming protein RhoA isoform X2 [Anas platyrhynchos]	7.51837e-14
CL11928Contig1	15.6386	2.20112	29.0761	13.2097	3.72352	0.0107721	0.432868	Up
CL11934Contig1	17.7438	5.5028	29.9847	5.44899	2.44599	0.0486865	0.921153	Up
CL11985Contig1	11.3578	0	22.7157	Inf	Inf	0.00400164	0.238728	Up	gi|513232856|ref|XP_003643138.2|PREDICTED: maestro heat-like repeat-containing protein family member 7-like [Gallus gallus]	1.55998e-09
CL12005Contig1	60.1419	17.609	102.675	5.83083	2.5437	0.00458708	0.265171	Up	gi|514764638|ref|XP_005024024.1|PREDICTED: uncharacterized protein LOC101792527 isoform X2 [Anas platyrhynchos]	8.17214e-177	sp|Q5E9L4|B2L14_BOVIN	1e-16	Apoptosis facilitator Bcl-2-like protein 14 OS=Bos taurus GN=BCL2L14 PE=2 SV=1	KOG4728	2e-09	Anti-apoptotic Bcl-2 family proteins, prevent opening of mitochondrial porin channel	ko04013, MAPK signaling pathway - fly;ko05202, Transcriptional misregulation in cancers;ko04320, Dorso-ventral axis formation;
CL12114Contig1	516.161	287.246	745.075	2.59385	1.3751	0.0217615	0.641504	Up	gi|514780149|ref|XP_005027549.1|PREDICTED: suppressor of cytokine signaling 1 [Anas platyrhynchos] >gi|483502731|gb|EOA95714.1| Suppressor of cytokine signaling 1, partial [Anas platyrhynchos]	2.10135e-113	sp|O15524|SOCS1_HUMAN	1e-83	Suppressor of cytokine signaling 1 OS=Homo sapiens GN=SOCS1 PE=1 SV=1	KOG4566	3e-84	Cytokine-inducible SH2 protein	ko04630, Jak-STAT signaling pathway;ko04120, Ubiquitin mediated proteolysis;ko05206, MicroRNAs in cancer;ko04930, Type II diabetes mellitus;ko05145, Toxoplasmosis;ko04380, Osteoclast differentiation;ko04910, Insulin signaling pathway;ko04917, Prolactin signaling pathway;	GO:0019210;GO:0046627;GO:0007259;GO:0019221;GO:0042518;GO:0016567;GO:0005159;GO:0071230;GO:0019901;GO:0045444	kinase inhibitor activity|negative regulation of insulin receptor signaling pathway|JAK-STAT cascade|cytokine-mediated signaling pathway|negative regulation of tyrosine phosphorylation of Stat3 protein|protein ubiquitination|insulin-like growth factor receptor binding|cellular response to amino acid stimulus|protein kinase binding|fat cell differentiation
CL12120Contig1	106.271	30.8157	181.726	5.89717	2.56002	0.00171097	0.136744	Up
CL12174Contig1	71.0965	28.6146	113.578	3.96925	1.98887	0.0191295	0.602369	Up
CL12340Contig1	22.7412	5.5028	39.9796	7.26532	2.86103	0.0139957	0.496422	Up
CL12390Contig1	13.463	3.30168	23.6243	7.15524	2.839	0.0483853	0.9183	Up
CL12431Contig1	17.2639	0	34.5278	Inf	Inf	0.000378551	0.0471793	Up
CL12454Contig1	105.867	41.8213	169.913	4.06284	2.02249	0.0110546	0.443163	Up
CL12456Contig1	143.633	73.7376	213.527	2.89578	1.53395	0.0400017	0.843789	Up	gi|542156881|ref|XP_005487224.1|PREDICTED: junctional adhesion molecule B [Zonotrichia albicollis]	2.24316e-121	sp|P57087|JAM2_HUMAN	1e-84	Junctional adhesion molecule B OS=Homo sapiens GN=JAM2 PE=1 SV=1	KOG0613	7e-09	Projectin/twitchin and related proteins	ko04530, Tight junction;ko04514, Cell adhesion molecules (CAMs);ko05120, Epithelial cell signaling in Helicobacter pylori infection;ko04670, Leukocyte transendothelial migration;	GO:0007162;GO:0046982	negative regulation of cell adhesion|protein heterodimerization activity
CL12504Contig1	261.434	122.162	400.705	3.2801	1.71374	0.011801	0.452616	Up
CL12530Contig1	735.208	439.124	1031.29	2.34852	1.23175	0.0294535	0.731268	Up	gi|483516478|gb|EOB03348.1|hypothetical protein Anapl_00618 [Anas platyrhynchos]	2.34522e-27
CL12550Contig1	20.6361	2.20112	39.071	17.7505	4.14979	0.00229094	0.164084	Up
CL12556Contig1	55.1445	17.609	92.68	5.26323	2.39595	0.0079453	0.371107	Up	gi|514735999|ref|XP_005017437.1|PREDICTED: LOW QUALITY PROTEIN: protein prune homolog 2 [Anas platyrhynchos]	0	sp|Q8WUY3|PRUN2_HUMAN	8e-18	Protein prune homolog 2 OS=Homo sapiens GN=PRUNE2 PE=1 SV=3					GO:0016462;GO:0005737	pyrophosphatase activity|cytoplasm
CL12570Contig1	72.4595	28.6146	116.304	4.06451	2.02308	0.0169863	0.557548	Up	gi|514711369|ref|XP_005011571.1|PREDICTED: achaete-scute homolog 4 [Anas platyrhynchos]	5.57195e-89	sp|Q6XD76|ASCL4_HUMAN	9e-33	Achaete-scute homolog 4 OS=Homo sapiens GN=ASCL4 PE=2 SV=1	KOG4029	2e-33	Transcription factor HAND2/Transcription factor TAL1/TAL2/LYL1		GO:0003677;GO:0046983	DNA binding|protein dimerization activity
CL12590Contig1	51.3436	20.9107	81.7765	3.91076	1.96745	0.0277064	0.71455	Up
CL12678Contig1	78.487	35.2179	121.756	3.45722	1.78961	0.0307403	0.753059	Up
CL12689Contig1	20.828	4.40224	37.2537	8.46244	3.08107	0.0118263	0.452616	Up
CL1277Contig1	191.093	60.5309	321.654	5.31389	2.40977	0.0011122	0.102191	Up
CL12788Contig1	77.2905	31.9163	122.665	3.84333	1.94236	0.0201046	0.616496	Up	gi|514735956|ref|XP_005017429.1|PREDICTED: protein FAM184A [Anas platyrhynchos]	0	sp|Q8NB25|F184A_HUMAN	0	Protein FAM184A OS=Homo sapiens GN=FAM184A PE=2 SV=3	KOG0161	1e-13	Myosin class II heavy chain
CL12794Contig1	217.986	118.861	317.111	2.66792	1.41572	0.0420767	0.85531	Up	gi|483524605|gb|EOB08517.1|hypothetical protein Anapl_07004 [Anas platyrhynchos]	6.21661e-18
CL12820Contig1	2174.56	810.013	3539.1	4.3692	2.12737	3.19411e-05	0.00717976	Up	gi|529431074|ref|XP_005235341.1|PREDICTED: IgGFc-binding protein-like [Falco peregrinus]	0	sp|Q9Y6R7|FCGBP_HUMAN	0	IgGFc-binding protein OS=Homo sapiens GN=FCGBP PE=1 SV=3	KOG1216	0	von Willebrand factor and related coagulation proteins
CL12878Contig1	17.4559	2.20112	32.7106	14.8609	3.89345	0.00602765	0.315164	Up
CL1288Contig1	127.003	34.1174	219.888	6.44504	2.68819	0.000770271	0.0788291	Up
CL128Contig1	60.9036	5.5028	116.304	21.1355	4.40159	1.91653e-05	0.00463938	Up
CL12925Contig1	14.538	0	29.0761	Inf	Inf	0.00106496	0.0983885	Up
CL12984Contig1	201.023	85.8438	316.202	3.68346	1.88106	0.00868581	0.388686	Up
CL12999Contig1	13.6294	0	27.2588	Inf	Inf	0.0015314	0.125993	Up
CL13003Contig1	55.4263	0	110.853	Inf	Inf	5.61609e-08	3.49106e-05	Up	gi|557292206|ref|XP_006028634.1|PREDICTED: uncharacterized protein LOC102372992 [Alligator sinensis]	7.94122e-39	sp|P10272|POL_BAEVM	6e-82	Pol polyprotein OS=Baboon endogenous virus (strain M7) GN=pol PE=3 SV=1	KOG0017	3e-65	FOG: Transposon-encoded proteins with TYA, reverse transcriptase, integrase domains in various combinations		GO:0046718;GO:0090305;GO:0003723;GO:0006310;GO:0006278;GO:0003964;GO:0004523;GO:0006508;GO:0075713;GO:0004190;GO:0015074	viral entry into host cell|nucleic acid phosphodiester bond hydrolysis|RNA binding|DNA recombination|RNA-dependent DNA replication|RNA-directed DNA polymerase activity|RNA-DNA hybrid ribonuclease activity|proteolysis|establishment of integrated proviral latency|aspartic-type endopeptidase activity|DNA integration
CL13056Contig1	125.019	37.4191	212.619	5.6821	2.50642	0.00158822	0.129399	Up
CL1307Contig1	29.364	3.30168	55.4263	16.7873	4.0693	0.000632599	0.0692435	Up
CL13112Contig1	745.92	436.923	1054.92	2.41442	1.27168	0.0244096	0.665612	Up
CL1311Contig2	20.924	5.5028	36.3451	6.60483	2.72352	0.021812	0.641504	Up
CL13138Contig1	493.758	296.051	691.466	2.33563	1.22381	0.0418307	0.854721	Up	gi|513186128|ref|XP_001233941.3|PREDICTED: N-acetyl-beta-glucosaminyl-glycoprotein 4-beta-N-acetylgalactosaminyltransferase 1 [Gallus gallus]	0	sp|Q76KP1|B4GN4_HUMAN	9e-177	N-acetyl-beta-glucosaminyl-glycoprotein 4-beta-N-acetylgalactosaminyltransferase 1 OS=Homo sapiens GN=B4GALNT4 PE=1 SV=1	KOG3588	3e-11	Chondroitin synthase 1	ko00513, Various types of N-glycan biosynthesis;	GO:0008376;GO:0032580	acetylgalactosaminyltransferase activity|Golgi cisterna membrane
CL13169Contig1	80.4452	26.4135	134.477	5.09123	2.34801	0.00551167	0.297766	Up
CL1317Contig1	36.78	15.4079	58.1522	3.77419	1.91617	0.044131	0.877526	Up	gi|483521923|gb|EOB06829.1|hypothetical protein Anapl_06419, partial [Anas platyrhynchos]	3.7476e-36
CL13193Contig1	75.3773	30.8157	119.939	3.89213	1.96056	0.0195629	0.604302	Up
CL13198Contig1	15.4467	0	30.8933	Inf	Inf	0.000748123	0.0771901	Up
CL13205Contig1	318.619	168.386	468.852	2.78439	1.47736	0.0234838	0.653638	Up
CL13214Contig1	15001.9	4741.22	25262.6	5.32829	2.41367	3.77902e-06	0.00124364	Up	gi|514786300|ref|XP_005028991.1|PREDICTED: E3 ubiquitin-protein ligase RNF213 isoform X1 [Anas platyrhynchos] >gi|514786304|ref|XP_005028992.1| PREDICTED: E3 ubiquitin-protein ligase RNF213 isoform X2 [Anas platyrhynchos]	0	sp|Q63HN8|RN213_HUMAN	0	E3 ubiquitin-protein ligase RNF213 OS=Homo sapiens GN=RNF213 PE=1 SV=3	KOG4417	1e-14	Predicted endonuclease		GO:0017111;GO:0005524;GO:0008270	nucleoside-triphosphatase activity|ATP binding|zinc ion binding
CL13219Contig1	120.674	60.5309	180.817	2.98719	1.57879	0.0396858	0.838884	Up
CL13295Contig1	50.9852	22.0112	79.9592	3.63266	1.86103	0.0366494	0.804503	Up	gi|529431390|ref|XP_005235496.1|PREDICTED: haptoglobin [Falco peregrinus] >gi|541951199|ref|XP_005432322.1| PREDICTED: haptoglobin [Falco cherrug]	4.85573e-128	sp|P00738|HPT_HUMAN	3e-122	Haptoglobin OS=Homo sapiens GN=HP PE=1 SV=1	KOG3627	7e-123	Trypsin		GO:0010942;GO:0042742;GO:0071682;GO:0005615;GO:0030492;GO:0006879;GO:2000296;GO:0006508;GO:0016209;GO:0004252;GO:0051354;GO:0031838;GO:0006953;GO:0042542	positive regulation of cell death|defense response to bacterium|endocytic vesicle lumen|extracellular space|hemoglobin binding|cellular iron ion homeostasis|negative regulation of hydrogen peroxide catabolic process|proteolysis|antioxidant activity|serine-type endopeptidase activity|negative regulation of oxidoreductase activity|haptoglobin-hemoglobin complex|acute-phase response|response to hydr…
CL13322Contig1	17.0975	3.30168	30.8933	9.35685	3.22602	0.0160737	0.537932	Up
CL13344Contig1	98.8862	45.123	152.649	3.38296	1.75829	0.0272008	0.713473	Up
CL13345Contig1	901.357	78.1398	1724.58	22.0704	4.46404	1.66806e-12	3.35954e-09	Up	gi|514741996|ref|XP_005018632.1|PREDICTED: UMP-CMP kinase 2, mitochondrial [Anas platyrhynchos]	5.18475e-133	sp|Q5EBM0|CMPK2_HUMAN	3e-93	UMP-CMP kinase 2, mitochondrial OS=Homo sapiens GN=CMPK2 PE=1 SV=3	KOG3327	7e-94	Thymidylate kinase/adenylate kinase	ko00240, Pyrimidine metabolism;	GO:0006233;GO:0005739;GO:0004127;GO:0005524;GO:0004798;GO:0033862;GO:0071222;GO:0005634	dTDP biosynthetic process|mitochondrion|cytidylate kinase activity|ATP binding|thymidylate kinase activity|UMP kinase activity|cellular response to lipopolysaccharide|nucleus
CL13353Contig1	132.66	0	265.319	Inf	Inf	7.86733e-12	1.27783e-08	Up
CL13406Contig1	168.831	60.5309	277.131	4.57835	2.19483	0.00329588	0.20927	Up	gi|514730372|ref|XP_005016105.1|PREDICTED: TOM1-like protein 1 [Anas platyrhynchos]	0	sp|O75674|TM1L1_HUMAN	9e-131	TOM1-like protein 1 OS=Homo sapiens GN=TOM1L1 PE=1 SV=2	KOG1087	2e-130	Cytosolic sorting protein GGA2/TOM1		GO:0005829;GO:0005768;GO:0030295;GO:0006886;GO:0045860	cytosol|endosome|protein kinase activator activity|intracellular protein transport|positive regulation of protein kinase activity
CL13415Contig1	9326.58	4324.1	14329.1	3.31376	1.72847	0.000491682	0.0575736	Up	gi|513203634|ref|XP_004944314.1|PREDICTED: 1-phosphatidylinositol 4,5-bisphosphate phosphodiesterase gamma-2 isoform X4 [Gallus gallus]	0	sp|P16885|PLCG2_HUMAN	0	1-phosphatidylinositol 4,5-bisphosphate phosphodiesterase gamma-2 OS=Homo sapiens GN=PLCG2 PE=1 SV=4	KOG1264	0	Phospholipase C	ko04012, ErbB signaling pathway;ko04014, Ras signaling pathway;ko04020, Calcium signaling pathway;ko04064, NF-kappa B signaling pathway;ko04066, HIF-1 signaling pathway;ko04070, Phosphatidylinositol signaling system;ko04370, VEGF signaling pathway;ko05200, Pathways in cancer;ko05205, Proteoglycans in cancer;ko05206, MicroRNAs in cancer;ko05214, Glioma;ko05223, Non-small cell lung cancer;ko05110, …	GO:0032959;GO:0050853;GO:0004871;GO:0032496;GO:0004435;GO:0010468;GO:0005543;GO:0043069;GO:0005829;GO:0009395;GO:0032237;GO:0050852;GO:0002316;GO:0006661;GO:0005886;GO:0051209;GO:0035556	inositol trisphosphate biosynthetic process|B cell receptor signaling pathway|signal transducer activity|response to lipopolysaccharide|phosphatidylinositol phospholipase C activity|regulation of gene expression|phospholipid binding|negative regulation of programmed cell death|cytosol|phospholipid catabolic process|activation of store-operated calcium channel activity|T cell receptor signaling pa…
CL13435Contig1	1538.19	759.387	2317	3.05115	1.60935	0.00194992	0.1472	Up	gi|45383307|ref|NP_989760.1|acidic chitinase precursor [Gallus gallus] >gi|27372863|dbj|BAC53757.1| CBPch04 [Gallus gallus]	0	sp|Q9BZP6|CHIA_HUMAN	0	Acidic mammalian chitinase OS=Homo sapiens GN=CHIA PE=1 SV=1	KOG2806	0	Chitinase	ko00520, Amino sugar and nucleotide sugar metabolism;	GO:0003796;GO:0001101;GO:0006032;GO:0090197;GO:0009620;GO:0019900;GO:0002532;GO:0006915;GO:0005615;GO:0008061;GO:0006955;GO:0007586;GO:0004568;GO:0005737;GO:0030246;GO:0000272;GO:0006037	lysozyme activity|response to acid|chitin catabolic process|positive regulation of chemokine secretion|response to fungus|kinase binding|production of molecular mediator involved in inflammatory response|apoptotic process|extracellular space|chitin binding|immune response|digestion|chitinase activity|cytoplasm|carbohydrate binding|polysaccharide catabolic process|cell wall chitin metabolic process
CL1343Contig1	80.3043	35.2179	125.391	3.56042	1.83205	0.0266542	0.70668	Up
CL13443Contig1	23.9377	8.80449	39.071	4.43762	2.14979	0.0486141	0.921153	Up	gi|513177421|ref|XP_004940327.1|PREDICTED: protein FAM184A isoform X6 [Gallus gallus]	1.00087e-104	sp|Q8NB25|F184A_HUMAN	3e-104	Protein FAM184A OS=Homo sapiens GN=FAM184A PE=2 SV=3	KOG1003	6e-06	Actin filament-coating protein tropomyosin
CL13454Contig1	16.7392	4.40224	29.0761	6.60483	2.72352	0.0356358	0.798886	Up
CL13466Contig1	271.46	148.576	394.344	2.65416	1.40826	0.0355204	0.798886	Up
CL13553Contig1	14.538	0	29.0761	Inf	Inf	0.00106496	0.0983885	Up
CL13592Contig1	1948.22	183.794	3712.65	20.2001	4.33629	3.09377e-14	1.0385e-10	Up	gi|514703749|ref|XP_005009015.1|PREDICTED: epithelial-stromal interaction protein 1 [Anas platyrhynchos]	1.80504e-133	sp|Q96J88|ESIP1_HUMAN	2e-48	Epithelial-stromal interaction protein 1 OS=Homo sapiens GN=EPSTI1 PE=2 SV=2
CL1361Contig1	133.414	45.123	221.705	4.91335	2.29671	0.00315184	0.20372	Up
CL13670Contig1	96.0521	2.20112	189.903	86.2756	6.43088	1.30016e-08	1.00715e-05	Up
CL13672Contig1	646.343	321.364	971.323	3.0225	1.59574	0.00613428	0.319407	Up	gi|483518980|gb|EOB04933.1|hypothetical protein Anapl_06854 [Anas platyrhynchos]	3.75594e-13
CL13743Contig1	18.5564	4.40224	32.7106	7.43044	2.89345	0.0216536	0.641504	Up
CL13824Contig1	33.0945	4.40224	61.7867	14.0353	3.81098	0.000672974	0.0720955	Up
CL13839Contig1	27.6682	9.90505	45.4314	4.58669	2.19745	0.0351513	0.798886	Up
CL13845Contig1	6.81471	0	13.6294	Inf	Inf	0.0356133	0.798886	Up
CL13847Contig1	7.26902	0	14.538	Inf	Inf	0.0280724	0.71455	Up
CL13854Contig1	18.1981	5.5028	30.8933	5.61411	2.48906	0.0433309	0.868186	Up
CL13868Contig1	13.6294	0	27.2588	Inf	Inf	0.0015314	0.125993	Up
CL1386Contig1	52.7065	20.9107	84.5024	4.04111	2.01475	0.02386	0.659733	Up
CL13917Contig1	24.5585	5.5028	43.6141	7.9258	2.98656	0.00909194	0.397564	Up	gi|483513923|gb|EOB01795.1|hypothetical protein Anapl_01526 [Anas platyrhynchos]	1.37248e-18
CL13918Contig1	64.6146	22.0112	107.218	4.87106	2.28424	0.00898556	0.397564	Up	gi|513203455|ref|XP_004944282.1|PREDICTED: tudor domain-containing protein 12 isoform X2 [Gallus gallus]	0	sp|Q587J7|TDR12_HUMAN	4e-159	Putative ATP-dependent RNA helicase TDRD12 OS=Homo sapiens GN=TDRD12 PE=2 SV=2	KOG0334	3e-08	RNA helicase		GO:0003676;GO:0005524;GO:0008026	nucleic acid binding|ATP binding|ATP-dependent helicase activity
CL13940Contig1	11.8122	0	23.6243	Inf	Inf	0.00328143	0.208879	Up
CL14043Contig1	106.367	31.9163	180.817	5.66535	2.50217	0.00210374	0.157393	Up	gi|449282609|gb|EMC89431.1|Putative uncharacterized transposon-derived protein ZK1236.4, partial [Columba livia]	1.07117e-34
CL1404Contig1	28.1225	9.90505	46.34	4.67842	2.22602	0.032265	0.765805	Up
CL14064Contig1	19.465	4.40224	34.5278	7.84324	2.97145	0.0169577	0.557336	Up
CL14114Contig1	15.1843	2.20112	28.1675	12.7969	3.67772	0.0124928	0.466288	Up
CL141Contig1	339.217	123.263	555.171	4.50397	2.1712	0.00101154	0.0957365	Up
CL14236Contig1	20.0858	1.10056	39.071	35.501	5.14979	0.000808366	0.0818224	Up	gi|483517911|gb|EOB04297.1|hypothetical protein Anapl_04707 [Anas platyrhynchos]	2.13396e-07
CL14241Contig1	91.7714	0	183.543	Inf	Inf	4.93681e-10	5.40376e-07	Up
CL14272Contig1	9.08628	0	18.1726	Inf	Inf	0.0113559	0.443242	Up
CL14306Contig1	18.1981	5.5028	30.8933	5.61411	2.48906	0.0433309	0.868186	Up
CL14336Contig1	10.9035	0	21.8071	Inf	Inf	0.00489571	0.276991	Up
CL14400Contig1	16.1889	3.30168	29.0761	8.80644	3.13856	0.0210567	0.635901	Up
CL14433Contig1	13.9173	3.30168	24.5329	7.43044	2.89345	0.0420163	0.854721	Up
CL14456Contig1	8.17765	0	16.3553	Inf	Inf	0.0176986	0.572712	Up
CL14510Contig1	19.9194	4.40224	35.4365	8.04964	3.00892	0.0150253	0.517823	Up
CL14514Contig1	9.08628	0	18.1726	Inf	Inf	0.0113559	0.443242	Up
CL14551Contig1	9.54059	0	19.0812	Inf	Inf	0.00915128	0.397564	Up
CL1461Contig1	235.672	92.4471	378.898	4.09853	2.03511	0.0037134	0.2287	Up	gi|543339281|ref|XP_005516476.1|PREDICTED: Krueppel-like factor 5 [Pseudopodoces humilis]	0	sp|Q13887|KLF5_HUMAN	0	Krueppel-like factor 5 OS=Homo sapiens GN=KLF5 PE=1 SV=2	KOG1721	0	FOG: Zn-finger		GO:0045893;GO:0001525;GO:0030033;GO:0046872;GO:0035914;GO:0003677;GO:0003700;GO:0005794;GO:0005634	positive regulation of transcription, DNA-templated|angiogenesis|microvillus assembly|metal ion binding|skeletal muscle cell differentiation|DNA binding|sequence-specific DNA binding transcription factor activity|Golgi apparatus|nucleus
CL14623Contig1	15.4467	0	30.8933	Inf	Inf	0.000748123	0.0771901	Up
CL14624Contig1	64.5126	0	129.025	Inf	Inf	1.54932e-08	1.1472e-05	Up
CL14644Contig1	3899.16	2461.95	5336.37	2.16753	1.11605	0.0206195	0.628077	Up	gi|514771786|ref|XP_005025715.1|PREDICTED: ftsJ methyltransferase domain-containing protein 1 isoform X1 [Anas platyrhynchos] >gi|514771790|ref|XP_005025716.1| PREDICTED: ftsJ methyltransferase domain-containing protein 1 isoform X2 [Anas platyrhynchos] >gi|514771794|ref|XP_005025717.1| PREDICTED: ftsJ methyltransferase domain-containing protein 1 isoform X3 [Anas platyrhynchos] >gi|514771798|ref…	0	sp|Q5RAY7|CMTR2_PONAB	0	Cap-specific mRNA (nucleoside-2'-O-)-methyltransferase 2 OS=Pongo abelii GN=CMTR2 PE=2 SV=1	KOG3674	0	FtsJ-like RNA methyltransferase		GO:0032259;GO:0008168	methylation|methyltransferase activity
CL14758Contig1	13.367	2.20112	24.5329	11.1457	3.47841	0.0229001	0.648598	Up
CL14760Contig1	41.8734	16.5084	67.2384	4.07298	2.02608	0.0294444	0.731268	Up
CL14783Contig1	37.8295	6.60337	69.0557	10.4577	3.38649	0.00115934	0.105559	Up	gi|543381873|ref|XP_005534127.1|PREDICTED: sodium/glucose cotransporter 2-like [Pseudopodoces humilis]	7.71475e-30	sp|P31639|SC5A2_HUMAN	2e-31	Sodium/glucose cotransporter 2 OS=Homo sapiens GN=SLC5A2 PE=1 SV=1	KOG2349	4e-32	Na+:iodide/myo-inositol/multivitamin symporters		GO:0005975;GO:0005886;GO:0055085;GO:0005362;GO:0016021	carbohydrate metabolic process|plasma membrane|transmembrane transport|low-affinity glucose:sodium symporter activity|integral component of membrane
CL14788Contig1	10.4492	0	20.8984	Inf	Inf	0.00600958	0.315164	Up
CL14815Contig1	11.5498	2.20112	20.8984	9.49445	3.24708	0.0430018	0.863938	Up
CL14851Contig1	17.6478	4.40224	30.8933	7.01763	2.81098	0.0277375	0.71455	Up
CL14871Contig1	13.9173	3.30168	24.5329	7.43044	2.89345	0.0420163	0.854721	Up
CL1488Contig1	199.27	60.5309	338.009	5.58409	2.48132	0.000751685	0.077241	Up
CL14915Contig1	7.72333	0	15.4467	Inf	Inf	0.0222382	0.642775	Up
CL14924Contig1	26.6381	3.30168	49.9745	15.1361	3.91992	0.00121225	0.109192	Up
CL14930Contig1	1321.77	840.829	1802.72	2.14398	1.10029	0.0349566	0.798886	Up	gi|514757883|ref|XP_005022419.1|PREDICTED: tumor necrosis factor ligand superfamily member 15 [Anas platyrhynchos] >gi|483509699|gb|EOA99269.1| Tumor necrosis factor ligand superfamily member 15, partial [Anas platyrhynchos]	2.34936e-110	sp|O95150|TNF15_HUMAN	2e-53	Tumor necrosis factor ligand superfamily member 15 OS=Homo sapiens GN=TNFSF15 PE=1 SV=2				ko04060, Cytokine-cytokine receptor interaction;	GO:0007250;GO:0005125;GO:0005615;GO:0006955;GO:0005164;GO:0006919;GO:0042107;GO:0005886	activation of NF-kappaB-inducing kinase activity|cytokine activity|extracellular space|immune response|tumor necrosis factor receptor binding|activation of cysteine-type endopeptidase activity involved in apoptotic process|cytokine metabolic process|plasma membrane
CL14958Contig1	17.9102	2.20112	33.6192	15.2737	3.93298	0.00522954	0.286886	Up
CL14959Contig1	14.0837	0	28.1675	Inf	Inf	0.00127525	0.112649	Up
CL14978Contig1	18.1981	5.5028	30.8933	5.61411	2.48906	0.0433309	0.868186	Up
CL14979Contig1	14.8259	3.30168	26.3502	7.98084	2.99654	0.0317853	0.760062	Up
CL14991Contig1	12.4584	2.20112	22.7157	10.3201	3.36738	0.0312875	0.758477	Up
CL15131Contig1	6.81471	0	13.6294	Inf	Inf	0.0356133	0.798886	Up
CL15134Contig1	38.9046	3.30168	74.5075	22.5665	4.49611	8.72737e-05	0.0158891	Up
CL15145Contig1	16.8096	0	33.6192	Inf	Inf	0.000447457	0.0530115	Up
CL15157Contig1	22.0245	7.70393	36.3451	4.71774	2.2381	0.0472413	0.904428	Up
CL15173Contig1	9.08628	0	18.1726	Inf	Inf	0.0113559	0.443242	Up
CL15218Contig1	7811.04	1964.5	13657.6	6.95219	2.79747	4.60308e-08	3.0496e-05	Up	gi|483523229|gb|EOB07649.1|Sterile alpha motif domain-containing protein 9-like, partial [Anas platyrhynchos]	0	sp|Q5K651|SAMD9_HUMAN	0	Sterile alpha motif domain-containing protein 9 OS=Homo sapiens GN=SAMD9 PE=1 SV=1
CL15329Contig1	85.9225	31.9163	139.929	4.38424	2.13233	0.0099733	0.417081	Up
CL15383Contig1	14.0837	0	28.1675	Inf	Inf	0.00127525	0.112649	Up
CL15407Contig1	20.1113	6.60337	33.6192	5.09123	2.34801	0.0455289	0.885449	Up
CL15477Contig1	15.2803	3.30168	27.2588	8.25604	3.04545	0.0276849	0.71455	Up
CL15496Contig1	11.9081	1.10056	22.7157	20.6401	4.36738	0.0141131	0.496422	Up
CL15511Contig1	13.463	3.30168	23.6243	7.15524	2.839	0.0483853	0.9183	Up	gi|483511448|gb|EOB00297.1|Putative RNA-binding protein 46, partial [Anas platyrhynchos]	1.84037e-148	sp|Q4R2Z0|RBM46_MACFA	1e-169	Probable RNA-binding protein 46 OS=Macaca fascicularis GN=RBM46 PE=2 SV=2	KOG0117	2e-169	Heterogeneous nuclear ribonucleoprotein R (RRM superfamily)		GO:0003676;GO:0000166	nucleic acid binding|nucleotide binding
CL15590Contig1	321.762	42.9219	600.603	13.9929	3.80663	1.47801e-07	8.00208e-05	Up
CL15601Contig1	84.534	26.4135	142.655	5.40083	2.43318	0.00386977	0.234755	Up
CL1561Contig1	63.7315	27.514	99.949	3.63266	1.86103	0.0302779	0.748782	Up
CL15622Contig1	16.1889	3.30168	29.0761	8.80644	3.13856	0.0210567	0.635901	Up	gi|514728776|ref|XP_005015722.1|PREDICTED: rho-related BTB domain-containing protein 3 [Anas platyrhynchos]	6.3534e-89	sp|Q9CTN4|RHBT3_MOUSE	2e-91	Rho-related BTB domain-containing protein 3 OS=Mus musculus GN=Rhobtb3 PE=2 SV=3	KOG0393	9e-13	Ras-related small GTPase, Rho type		GO:0042147;GO:0017137;GO:0007264;GO:0006200;GO:0005524;GO:0016887;GO:0005525	retrograde transport, endosome to Golgi|Rab GTPase binding|small GTPase mediated signal transduction|ATP catabolic process|ATP binding|ATPase activity|GTP binding
CL15634Contig1	12.7208	0	25.4416	Inf	Inf	0.00222793	0.160484	Up
CL15676Contig1	16.9056	1.10056	32.7106	29.7217	4.89345	0.0023032	0.164261	Up	gi|558183706|ref|XP_006127859.1|PREDICTED: KAT8 regulatory NSL complex subunit 1-like [Pelodiscus sinensis]	4.23884e-14
CL15678Contig1	16.3553	0	32.7106	Inf	Inf	0.000529983	0.0606482	Up
CL15692Contig1	14.9924	0	29.9847	Inf	Inf	0.000891641	0.0870059	Up	gi|6576737|dbj|BAA21739.2|ORF1 [Acanthochelys spixii]	7.06588e-15
CL15771Contig1	32.0194	7.70393	56.3349	7.31249	2.87036	0.00602775	0.315164	Up
CL15850Contig1	12.7208	0	25.4416	Inf	Inf	0.00222793	0.160484	Up
CL15887Contig1	1917.51	1222.72	2612.3	2.13646	1.09523	0.0291093	0.727197	Up	gi|514742148|ref|XP_005018666.1|PREDICTED: interleukin-21 receptor isoform X1 [Anas platyrhynchos]	3.65677e-165	sp|Q9HBE5|IL21R_HUMAN	4e-46	Interleukin-21 receptor OS=Homo sapiens GN=IL21R PE=1 SV=1				ko04630, Jak-STAT signaling pathway;ko04060, Cytokine-cytokine receptor interaction;ko05321, Inflammatiory bowel disease (IBD);	GO:0019221;GO:0004896	cytokine-mediated signaling pathway|cytokine receptor activity
CL15897Contig1	39.7172	2.20112	77.2333	35.0882	5.13291	2.45207e-05	0.00563763	Up
CL16064Contig1	15.901	0	31.802	Inf	Inf	0.000629023	0.0691796	Up
CL16127Contig1	19.561	5.5028	33.6192	6.10947	2.61105	0.0306538	0.751436	Up
CL16141Contig1	22.3829	6.60337	38.1624	5.77923	2.53088	0.0267789	0.70668	Up
CL16147Contig1	11020.9	5946.33	16095.4	2.70678	1.43658	0.00378591	0.230798	Up	gi|514786619|ref|XP_005029066.1|PREDICTED: opioid growth factor receptor [Anas platyrhynchos]	0	sp|Q9NZT2|OGFR_HUMAN	1e-100	Opioid growth factor receptor OS=Homo sapiens GN=OGFR PE=1 SV=3					GO:0016020;GO:0004872	membrane|receptor activity
CL16149Contig1	1125.75	697.756	1553.75	2.22679	1.15496	0.0301302	0.745497	Up
CL16197Contig1	8.63196	0	17.2639	Inf	Inf	0.0141475	0.496422	Up
CL161Contig1	214.026	68.2348	359.817	5.27321	2.39868	0.000929687	0.0895041	Up
CL16252Contig1	239.889	119.961	359.817	2.99944	1.58469	0.021305	0.637987	Up
CL16343Contig1	16.7392	4.40224	29.0761	6.60483	2.72352	0.0356358	0.798886	Up
CL16393Contig1	22.2869	5.5028	39.071	7.10019	2.82786	0.01562	0.531521	Up
CL16517Contig1	20.4441	0	40.8882	Inf	Inf	0.000124094	0.0208972	Up
CL16547Contig1	22.0245	7.70393	36.3451	4.71774	2.2381	0.0472413	0.904428	Up
CL16551Contig1	1526.03	937.678	2114.38	2.25491	1.17307	0.0225304	0.646397	Up	gi|514790351|ref|XP_005029964.1|PREDICTED: hepatitis A virus cellular receptor 1 homolog isoform X3 [Anas platyrhynchos]	3.34349e-85	sp|Q5QNS5|HAVR1_MOUSE	1e-32	Hepatitis A virus cellular receptor 1 homolog OS=Mus musculus GN=Havcr1 PE=1 SV=2
CL16559Contig1	16.1889	3.30168	29.0761	8.80644	3.13856	0.0210567	0.635901	Up
CL16608Contig1	10.4492	0	20.8984	Inf	Inf	0.00600958	0.315164	Up
CL16615Contig1	14.1797	1.10056	27.2588	24.7681	4.63041	0.00601423	0.315164	Up
CL16624Contig1	17.2639	0	34.5278	Inf	Inf	0.000378551	0.0471793	Up
CL1664Contig1	47.1333	14.3073	79.9592	5.5887	2.48251	0.00776355	0.365671	Up
CL16659Contig1	34.3614	3.30168	65.4212	19.8145	4.30848	0.000211988	0.030584	Up
CL16714Contig1	31.4947	12.1062	50.8831	4.20308	2.07145	0.0378804	0.821058	Up
CL16717Contig1	29.0761	0	58.1522	Inf	Inf	9.35101e-06	0.00270593	Up
CL16761Contig1	6.81471	0	13.6294	Inf	Inf	0.0356133	0.798886	Up
CL16764Contig1	9.54059	0	19.0812	Inf	Inf	0.00915128	0.397564	Up	gi|524994539|ref|XP_005045083.1|PREDICTED: uncharacterized protein LOC101808790 [Ficedula albicollis]	5.3194e-26
CL16768Contig1	8.63196	0	17.2639	Inf	Inf	0.0141475	0.496422	Up
CL16770Contig1	16.2848	4.40224	28.1675	6.39843	2.67772	0.0404339	0.846811	Up
CL16784Contig1	10.4492	0	20.8984	Inf	Inf	0.00600958	0.315164	Up
CL16819Contig1	213.577	89.1454	338.009	3.79166	1.92283	0.00680565	0.337225	Up	gi|514781131|ref|XP_005027781.1|PREDICTED: C-type lectin domain family 2 member E-like isoform X1 [Anas platyrhynchos] >gi|514781135|ref|XP_005027782.1| PREDICTED: C-type lectin domain family 2 member E-like isoform X2 [Anas platyrhynchos] >gi|514781139|ref|XP_005027783.1| PREDICTED: C-type lectin domain family 2 member E-like isoform X3 [Anas platyrhynchos]	2.19145e-32
CL16835Contig1	6.36039	0	12.7208	Inf	Inf	0.0454118	0.885449	Up
CL16851Contig1	280.636	128.766	432.507	3.35887	1.74798	0.0093702	0.400838	Up	gi|363739034|ref|XP_424573.3|PREDICTED: glutamine--fructose-6-phosphate aminotransferase [isomerizing] 2 isoform 3 [Gallus gallus]	0	sp|O94808|GFPT2_HUMAN	0	Glutamine--fructose-6-phosphate aminotransferase [isomerizing] 2 OS=Homo sapiens GN=GFPT2 PE=1 SV=3	KOG1268	0	Glucosamine 6-phosphate synthetases, contain amidotransferase and phosphosugar isomerase domains	ko00250, Alanine, aspartate and glutamate metabolism;ko00520, Amino sugar and nucleotide sugar metabolism;	GO:0004360;GO:0016051;GO:0030246	glutamine-fructose-6-phosphate transaminase (isomerizing) activity|carbohydrate biosynthetic process|carbohydrate binding
CL16854Contig1	23.8418	7.70393	39.9796	5.18951	2.3756	0.0317906	0.760062	Up
CL16895Contig1	7.26902	0	14.538	Inf	Inf	0.0280724	0.71455	Up
CL16904Contig1	13.8213	2.20112	25.4416	11.5585	3.53088	0.0196365	0.604351	Up
CL16906Contig1	14.73	2.20112	27.2588	12.3841	3.63041	0.0145054	0.505091	Up
CL17009Contig1	11.4538	1.10056	21.8071	19.8145	4.30848	0.0168487	0.554981	Up
CL17024Contig1	23.8418	7.70393	39.9796	5.18951	2.3756	0.0317906	0.760062	Up
CL17052Contig1	8.63196	0	17.2639	Inf	Inf	0.0141475	0.496422	Up	gi|514705105|ref|XP_005009672.1|PREDICTED: uncharacterized protein LOC101791504 [Anas platyrhynchos]	1.38192e-38
CL17059Contig1	1449.02	497.454	2400.59	4.82577	2.27076	2.17199e-05	0.00511036	Up	gi|483518436|gb|EOB04608.1|Adseverin, partial [Anas platyrhynchos]	0	sp|Q5ZIV9|ADSV_CHICK	0	Adseverin OS=Gallus gallus GN=SCIN PE=2 SV=2	KOG0443	0	Actin regulatory proteins (gelsolin/villin family)	ko04810, Regulation of actin cytoskeleton;ko05203, Viral carcinogenesis;ko04666, Fc gamma R-mediated phagocytosis;	GO:0045654;GO:0005545;GO:0005856;GO:0051047;GO:0005509;GO:0017156;GO:0051015;GO:0043065;GO:0051014;GO:0032330;GO:0008285;GO:0005546;GO:0005938;GO:0001786;GO:0045010;GO:0051693	positive regulation of megakaryocyte differentiation|1-phosphatidylinositol binding|cytoskeleton|positive regulation of secretion|calcium ion binding|calcium ion-dependent exocytosis|actin filament binding|positive regulation of apoptotic process|actin filament severing|regulation of chondrocyte differentiation|negative regulation of cell proliferation|phosphatidylinositol-4,5-bisphosphate bindin…
CL17068Contig1	23.4579	3.30168	43.6141	13.2097	3.72352	0.00272096	0.184889	Up
CL17082Contig1	34.5534	5.5028	63.6039	11.5585	3.53088	0.0010776	0.0993745	Up
CL17091Contig1	244.855	93.5477	396.162	4.23486	2.08232	0.00284945	0.190403	Up
CL17101Contig1	13.367	2.20112	24.5329	11.1457	3.47841	0.0229001	0.648598	Up
CL17108Contig1	20.2777	3.30168	37.2537	11.2833	3.49611	0.00644409	0.329146	Up
CL17118Contig1	8.63196	0	17.2639	Inf	Inf	0.0141475	0.496422	Up
CL17187Contig1	7.26902	0	14.538	Inf	Inf	0.0280724	0.71455	Up	gi|529443542|ref|XP_005241491.1|PREDICTED: protein unc-13 homolog C [Falco peregrinus]	1.33894e-66	sp|Q8K0T7|UN13C_MOUSE	3e-73	Protein unc-13 homolog C OS=Mus musculus GN=Unc13c PE=1 SV=3	KOG1011	2e-65	Neurotransmitter release regulator, UNC-13		GO:0007268;GO:0046872;GO:0035556;GO:0019992	synaptic transmission|metal ion binding|intracellular signal transduction|diacylglycerol binding
CL17241Contig1	23.8418	7.70393	39.9796	5.18951	2.3756	0.0317906	0.760062	Up
CL17270Contig1	29.1271	11.0056	47.2486	4.29314	2.10203	0.0396642	0.838884	Up	gi|483508112|gb|EOA98383.1|Uncharacterized protein C6orf81-like protein [Anas platyrhynchos]	6.80803e-07
CL17291Contig1	13.367	2.20112	24.5329	11.1457	3.47841	0.0229001	0.648598	Up
CL17318Contig1	16.0929	2.20112	29.9847	13.6225	3.76792	0.00929952	0.400548	Up
CL17326Contig1	19.1067	5.5028	32.7106	5.94435	2.57152	0.0343813	0.790833	Up
CL17330Contig1	16.2848	4.40224	28.1675	6.39843	2.67772	0.0404339	0.846811	Up
CL17384Contig1	22.9331	7.70393	38.1624	4.95362	2.30848	0.0387138	0.828774	Up
CL17394Contig1	246.307	73.7376	418.877	5.68065	2.50606	0.000416586	0.0507882	Up	gi|514741222|ref|XP_005018450.1|PREDICTED: ras association domain-containing protein 9 isoform X1 [Anas platyrhynchos]	0	sp|O75901|RASF9_HUMAN	0	Ras association domain-containing protein 9 OS=Homo sapiens GN=RASSF9 PE=2 SV=2	KOG1574	0	Predicted cell growth/differentiation regulator, contains RA domain		GO:0005768;GO:0007165;GO:0012510;GO:0005829	endosome|signal transduction|trans-Golgi network transport vesicle membrane|cytosol
CL17413Contig1	9.9949	0	19.9898	Inf	Inf	0.0074025	0.353084	Up
CL17417Contig1	12.4584	2.20112	22.7157	10.3201	3.36738	0.0312875	0.758477	Up
CL17489Contig1	141.835	58.3297	225.34	3.8632	1.9498	0.010233	0.422126	Up
CL17529Contig1	18.5564	4.40224	32.7106	7.43044	2.89345	0.0216536	0.641504	Up
CL17565Contig1	19.561	5.5028	33.6192	6.10947	2.61105	0.0306538	0.751436	Up	gi|483512333|gb|EOB00827.1|hypothetical protein Anapl_12825 [Anas platyrhynchos]	8.7738e-10
CL17642Contig1	13.9173	3.30168	24.5329	7.43044	2.89345	0.0420163	0.854721	Up
CL17677Contig1	14.538	0	29.0761	Inf	Inf	0.00106496	0.0983885	Up	gi|449271961|gb|EMC82117.1|Collagen alpha-3(IX) chain, partial [Columba livia]	6.14786e-06
CL17720Contig1	104.364	50.6258	158.101	3.12294	1.6429	0.0366507	0.804503	Up
CL17726Contig1	6.36039	0	12.7208	Inf	Inf	0.0454118	0.885449	Up
CL17740Contig1	17.7182	0	35.4365	Inf	Inf	0.000320903	0.041882	Up
CL17752Contig1	7.26902	0	14.538	Inf	Inf	0.0280724	0.71455	Up
CL17790Contig1	19.0812	0	38.1624	Inf	Inf	0.000197827	0.0290402	Up
CL17807Contig1	6.36039	0	12.7208	Inf	Inf	0.0454118	0.885449	Up
CL17861Contig1	16.5472	2.20112	30.8933	14.0353	3.81098	0.00803807	0.373468	Up
CL17863Contig1	9.08628	0	18.1726	Inf	Inf	0.0113559	0.443242	Up	gi|514756423|ref|XP_005022074.1|PREDICTED: uncharacterized protein LOC101791992 [Anas platyrhynchos]	5.02706e-29								GO:0030246	carbohydrate binding
CL17873Contig1	20.0153	5.5028	34.5278	6.27459	2.64952	0.0273481	0.713473	Up
CL17874Contig1	18.6269	0	37.2537	Inf	Inf	0.000231987	0.0329036	Up	gi|363744206|ref|XP_424756.3|PREDICTED: splicing regulatory glutamine/lysine-rich protein 1 isoform X4 [Gallus gallus]	1.33542e-10
CL17920Contig1	29.5814	11.0056	48.1573	4.3757	2.12951	0.036575	0.804503	Up	gi|543299232|ref|XP_005431494.1|PREDICTED: uncharacterized protein LOC102032252 [Geospiza fortis]	2.15164e-06	sp|P04474|PRP3_RAT	2e-06	Acidic proline-rich protein PRP33 OS=Rattus norvegicus GN=Prpg1 PE=2 SV=1
CL17945Contig1	12.0041	2.20112	21.8071	9.90725	3.30848	0.0366533	0.804503	Up
CL17954Contig1	20.2777	3.30168	37.2537	11.2833	3.49611	0.00644409	0.329146	Up
CL17964Contig1	15.1843	2.20112	28.1675	12.7969	3.67772	0.0124928	0.466288	Up
CL17968Contig1	14.9924	0	29.9847	Inf	Inf	0.000891641	0.0870059	Up
CL18023Contig1	13.6294	0	27.2588	Inf	Inf	0.0015314	0.125993	Up
CL18030Contig1	12.4584	2.20112	22.7157	10.3201	3.36738	0.0312875	0.758477	Up
CL18066Contig1	27.4763	7.70393	47.2486	6.13306	2.61661	0.0147937	0.513355	Up
CL18067Contig1	22.6452	4.40224	40.8882	9.28805	3.21538	0.00740514	0.353084	Up
CL1808Contig1	414.856	230.017	599.694	2.60717	1.38249	0.0260258	0.698669	Up
CL18095Contig1	7.26902	0	14.538	Inf	Inf	0.0280724	0.71455	Up	gi|50762252|ref|XP_424990.1|PREDICTED: cyclic AMP-responsive element-binding protein 3 [Gallus gallus]	5.7155e-25								GO:0019043;GO:0002230;GO:0042127;GO:0000139;GO:0042994;GO:2000326;GO:0001558;GO:0000977;GO:0005829;GO:0051928;GO:0006990;GO:0016604;GO:0043025;GO:0008140;GO:0050930;GO:0031726;GO:0090045;GO:0090026;GO:0003700;GO:0042803;GO:0030176;GO:0003682	establishment of viral latency|positive regulation of defense response to virus by host|regulation of cell proliferation|Golgi membrane|cytoplasmic sequestering of transcription factor|negative regulation of ligand-dependent nuclear receptor transcription coactivator activity|regulation of cell growth|RNA polymerase II regulatory region sequence-specific DNA binding|cytosol|positive regulation of…
CL18128Contig1	9.54059	0	19.0812	Inf	Inf	0.00915128	0.397564	Up
CL1812Contig1	70.5718	33.0168	108.127	3.2749	1.71145	0.0416985	0.854721	Up	gi|514710183|ref|XP_005011298.1|PREDICTED: follistatin-related protein 4 [Anas platyrhynchos]	0	sp|Q6MZW2|FSTL4_HUMAN	0	Follistatin-related protein 4 OS=Homo sapiens GN=FSTL4 PE=2 SV=3	KOG4475	2e-17	FOG: Immunoglobin and related proteins		GO:0005509	calcium ion binding
CL18140Contig1	30.2022	7.70393	52.7004	6.84072	2.77415	0.00856187	0.38733	Up
CL18175Contig1	15.7346	3.30168	28.1675	8.53124	3.09276	0.0241338	0.662986	Up
CL18192Contig1	20.5656	6.60337	34.5278	5.22883	2.38649	0.0408982	0.848713	Up
CL18196Contig1	12.0041	2.20112	21.8071	9.90725	3.30848	0.0366533	0.804503	Up
CL18238Contig1	23.266	1.10056	45.4314	41.2802	5.36738	0.000306238	0.040792	Up	gi|13274416|gb|AAK17933.1|AF324490_1membrane-bound immunoglobulin alpha heavy chain [Anas platyrhynchos] >gi|14589340|emb|CAC43069.1| immunoglobulin alpha heavy chain [Anas platyrhynchos]	4.97037e-16
CL1823Contig1	177.271	58.3297	296.213	5.07824	2.34433	0.00167546	0.135629	Up
CL1827Contig1	90.1328	38.5196	141.746	3.67984	1.87964	0.0206117	0.628077	Up
CL18312Contig1	206.596	92.4471	320.746	3.4695	1.79473	0.0116273	0.4487	Up	gi|514778900|ref|XP_005027252.1|PREDICTED: tetratricopeptide repeat protein 25, partial [Anas platyrhynchos]	1.42827e-70	sp|Q9D4B2|TTC25_MOUSE	7e-43	Tetratricopeptide repeat protein 25 OS=Mus musculus GN=Ttc25 PE=2 SV=3	KOG1124	3e-43	FOG: TPR repeat
CL18330Contig1	9.08628	0	18.1726	Inf	Inf	0.0113559	0.443242	Up	gi|514730131|ref|XP_005016049.1|PREDICTED: cytokine receptor common subunit beta-like isoform X2 [Anas platyrhynchos]	4.19449e-77
CL18380Contig1	22.7157	0	45.4314	Inf	Inf	5.91981e-05	0.0116853	Up
CL1840Contig1	27.2139	9.90505	44.5228	4.49496	2.16831	0.0383139	0.827488	Up
CL18410Contig1	472.207	272.939	671.476	2.46017	1.29876	0.0322993	0.765805	Up
CL18418Contig1	154.555	58.3297	250.781	4.29937	2.10413	0.00527577	0.28874	Up
CL18425Contig1	7.26902	0	14.538	Inf	Inf	0.0280724	0.71455	Up	gi|449495454|ref|XP_002191900.2|PREDICTED: uncharacterized protein LOC100228131 [Taeniopygia guttata]	3.22249e-43	sp|P63132|POK5_HUMAN	1e-41	HERV-K_19p13.11 provirus ancestral Pol protein OS=Homo sapiens PE=3 SV=1					GO:0003723;GO:0006310;GO:0008270;GO:0006278;GO:0005730;GO:0003964;GO:0004523;GO:0003677;GO:0005737;GO:0015074;GO:0051028	RNA binding|DNA recombination|zinc ion binding|RNA-dependent DNA replication|nucleolus|RNA-directed DNA polymerase activity|RNA-DNA hybrid ribonuclease activity|DNA binding|cytoplasm|DNA integration|mRNA transport
CL18484Contig1	156.443	53.9275	258.959	4.80198	2.26363	0.00282695	0.190403	Up
CL18499Contig1	15.7346	3.30168	28.1675	8.53124	3.09276	0.0241338	0.662986	Up	gi|514705552|ref|XP_005009885.1|PREDICTED: T-cell surface glycoprotein CD1b-2-like isoform X1 [Anas platyrhynchos]	3.885e-40	sp|Q29422|CD1B2_SHEEP	5e-08	T-cell surface glycoprotein CD1b-2 OS=Ovis aries PE=1 SV=1
CL18543Contig1	16.6432	3.30168	29.9847	9.08164	3.18295	0.0183887	0.587629	Up
CL18544Contig1	12.0041	2.20112	21.8071	9.90725	3.30848	0.0366533	0.804503	Up
CL18576Contig1	7.26902	0	14.538	Inf	Inf	0.0280724	0.71455	Up	gi|483513883|gb|EOB01762.1|hypothetical protein Anapl_14448 [Anas platyrhynchos]	5.44343e-06
CL18585Contig1	24.2961	7.70393	40.8882	5.30745	2.40802	0.0288317	0.722571	Up
CL18659Contig1	20.4696	5.5028	35.4365	6.43971	2.687	0.0244152	0.665612	Up
CL1873Contig1	61.5498	7.70393	115.396	14.9788	3.90485	7.33421e-05	0.0138309	Up
CL18774Contig1	54.1654	22.0112	86.3196	3.92162	1.97145	0.0260607	0.698669	Up
CL18776Contig1	16.5472	2.20112	30.8933	14.0353	3.81098	0.00803807	0.373468	Up
CL18827Contig1	13.367	2.20112	24.5329	11.1457	3.47841	0.0229001	0.648598	Up
CL1886Contig1	37.2793	5.5028	69.0557	12.5492	3.64952	0.00064723	0.0696339	Up
CL1888Contig1	1109.96	329.068	1890.85	5.74609	2.52258	6.10491e-06	0.00187432	Up	gi|543717116|ref|XP_005499812.1|PREDICTED: CCR4-NOT transcription complex subunit 4 isoform X4 [Columba livia]	0	sp|O95628|CNOT4_HUMAN	0	CCR4-NOT transcription complex subunit 4 OS=Homo sapiens GN=CNOT4 PE=1 SV=3	KOG2068	0	MOT2 transcription factor	ko03018, RNA degradation;	GO:0051865;GO:0004842;GO:0003723;GO:0030014;GO:0008270;GO:0000166	protein autoubiquitination|ubiquitin-protein transferase activity|RNA binding|CCR4-NOT complex|zinc ion binding|nucleotide binding
CL18949Contig1	55.3364	19.8101	90.8628	4.58669	2.19745	0.0138142	0.496422	Up	gi|529431078|ref|XP_005235343.1|PREDICTED: LOW QUALITY PROTEIN: leucine-rich repeat LGI family member 4-like [Falco peregrinus]	2.39378e-47	sp|Q8N135|LGI4_HUMAN	1e-27	Leucine-rich repeat LGI family member 4 OS=Homo sapiens GN=LGI4 PE=2 SV=1	KOG0260	2e-11	RNA polymerase II, large subunit		GO:0005615;GO:0008344;GO:0042551;GO:0022011;GO:0014009	extracellular space|adult locomotory behavior|neuron maturation|myelination in peripheral nervous system|glial cell proliferation
CL19004Contig1	20.2777	3.30168	37.2537	11.2833	3.49611	0.00644409	0.329146	Up
CL1901Contig1	51.4334	1.10056	101.766	92.4677	6.53088	8.01613e-07	0.000317811	Up
CL19032Contig1	31.4947	12.1062	50.8831	4.20308	2.07145	0.0378804	0.821058	Up	gi|564260228|ref|XP_006269029.1|PREDICTED: complement factor B [Alligator mississippiensis]	7.72354e-76	sp|P04186|CFAB_MOUSE	5e-81	Complement factor B OS=Mus musculus GN=Cfb PE=1 SV=2	KOG3627	8e-79	Trypsin	ko05150, Staphylococcus aureus infection;ko04610, Complement and coagulation cascades;	GO:0005615;GO:0004252;GO:0006957;GO:0008283;GO:0006508	extracellular space|serine-type endopeptidase activity|complement activation, alternative pathway|cell proliferation|proteolysis
CL19052Contig1	9.9949	0	19.9898	Inf	Inf	0.0074025	0.353084	Up
CL1917Contig1	84.1307	37.4191	130.842	3.49668	1.80598	0.0274634	0.71455	Up	gi|483519430|gb|EOB05233.1|hypothetical protein Anapl_12291 [Anas platyrhynchos]	4.17739e-45
CL19249Contig1	4138.57	2242.94	6034.2	2.6903	1.42777	0.00324544	0.208879	Up	gi|514706680|ref|XP_005010421.1|PREDICTED: regulator of G-protein signaling 1 [Anas platyrhynchos] >gi|483523920|gb|EOB08092.1| Regulator of G-protein signaling 1, partial [Anas platyrhynchos]	8.85726e-24	sp|P97844|RGS1_RAT	1e-21	Regulator of G-protein signaling 1 OS=Rattus norvegicus GN=Rgs1 PE=2 SV=2	KOG3589	6e-20	G protein signaling regulators		GO:0038032	termination of G-protein coupled receptor signaling pathway
CL1928Contig1	54.2808	7.70393	100.858	13.0917	3.71058	0.000184234	0.0280252	Up
CL19315Contig1	17.2639	0	34.5278	Inf	Inf	0.000378551	0.0471793	Up
CL19376Contig1	32.5442	3.30168	61.7867	18.7137	4.22602	0.000310938	0.0413089	Up
CL19394Contig1	14.9924	0	29.9847	Inf	Inf	0.000891641	0.0870059	Up
CL19414Contig1	6.81471	0	13.6294	Inf	Inf	0.0356133	0.798886	Up
CL19518Contig1	22.6452	4.40224	40.8882	9.28805	3.21538	0.00740514	0.353084	Up
CL19522Contig1	54.3063	13.2067	95.4059	7.22404	2.85281	0.00217677	0.160004	Up
CL19547Contig1	16.7392	4.40224	29.0761	6.60483	2.72352	0.0356358	0.798886	Up
CL19637Contig1	6.36039	0	12.7208	Inf	Inf	0.0454118	0.885449	Up
CL19661Contig1	19.0812	0	38.1624	Inf	Inf	0.000197827	0.0290402	Up
CL19675Contig1	4228.84	2173.61	6284.07	2.89108	1.53161	0.00163313	0.132628	Up	gi|514722870|ref|XP_005031826.1|PREDICTED: LOW QUALITY PROTEIN: methyltransferase like 23 [Anas platyrhynchos]	8.53643e-43	sp|Q6DJF8|MET23_XENLA	5e-34	Methyltransferase-like protein 23 OS=Xenopus laevis GN=mettl23 PE=2 SV=1	KOG2793	3e-31	Putative N2,N2-dimethylguanosine tRNA methyltransferase
CL19737Contig1	11.3578	0	22.7157	Inf	Inf	0.00400164	0.238728	Up
CL19757Contig1	51.4589	6.60337	96.3145	14.5857	3.86648	0.000140631	0.02299	Up	gi|449274414|gb|EMC83597.1|RNA-directed DNA polymerase from mobile element jockey, partial [Columba livia]	1.43829e-07
CL19802Contig1	11.3578	0	22.7157	Inf	Inf	0.00400164	0.238728	Up
CL19811Contig1	9.08628	0	18.1726	Inf	Inf	0.0113559	0.443242	Up
CL19840Contig1	12.0041	2.20112	21.8071	9.90725	3.30848	0.0366533	0.804503	Up
CL19865Contig1	10.9995	1.10056	20.8984	18.9889	4.24708	0.0201577	0.617373	Up
CL19952Contig1	126.362	52.8269	199.898	3.78402	1.91992	0.0128394	0.476752	Up	gi|363740792|ref|XP_003642379.1|PREDICTED: hexosaminidase D isoform X1 [Gallus gallus]	2.47586e-89	sp|A6QNR0|HEXDC_BOVIN	5e-120	Hexosaminidase D OS=Bos taurus GN=HEXDC PE=2 SV=2					GO:0005975;GO:0005737;GO:0005634;GO:0004563	carbohydrate metabolic process|cytoplasm|nucleus|beta-N-acetylhexosaminidase activity
CL19953Contig1	52.2461	0	104.492	Inf	Inf	9.10723e-08	5.21089e-05	Up
CL19990Contig1	583.149	331.269	835.029	2.5207	1.33382	0.0231459	0.650346	Up
CL19993Contig1	2190.83	1106.06	3275.6	2.9615	1.56633	0.00180891	0.141649	Up	gi|529440810|ref|XP_005240145.1|PREDICTED: cell adhesion molecule 1 [Falco peregrinus]	0	sp|Q9BY67|CADM1_HUMAN	0	Cell adhesion molecule 1 OS=Homo sapiens GN=CADM1 PE=1 SV=2	KOG4475	3e-15	FOG: Immunoglobin and related proteins	ko04514, Cell adhesion molecules (CAMs);	GO:0008037;GO:0016338;GO:0016021;GO:0051606;GO:0030424;GO:0007416;GO:0007156;GO:0030425;GO:0007157;GO:0008021;GO:0008022;GO:0042271;GO:0050715;GO:0005102;GO:0030165;GO:0005911;GO:0009826;GO:0042803;GO:0016323;GO:0060348	cell recognition|calcium-independent cell-cell adhesion|integral component of membrane|detection of stimulus|axon|synapse assembly|homophilic cell adhesion|dendrite|heterophilic cell-cell adhesion|synaptic vesicle|protein C-terminus binding|susceptibility to natural killer cell mediated cytotoxicity|positive regulation of cytokine secretion|receptor binding|PDZ domain binding|cell-cell junction|u…
CL1Contig1	111.198	35.2179	187.177	5.31483	2.41002	0.00272898	0.184935	Up
CL20002Contig1	9.9949	0	19.9898	Inf	Inf	0.0074025	0.353084	Up
CL20005Contig1	24.6544	6.60337	42.7055	6.46723	2.69315	0.0159955	0.537932	Up
CL20006Contig1	7.72333	0	15.4467	Inf	Inf	0.0222382	0.642775	Up
CL20098Contig1	16.8096	0	33.6192	Inf	Inf	0.000447457	0.0530115	Up
CL20227Contig1	18.6269	0	37.2537	Inf	Inf	0.000231987	0.0329036	Up
CL20266Contig1	13.8213	2.20112	25.4416	11.5585	3.53088	0.0196365	0.604351	Up	gi|483517605|gb|EOB04076.1|hypothetical protein Anapl_04629 [Anas platyrhynchos]	8.11529e-10
CL20302Contig1	13.9173	3.30168	24.5329	7.43044	2.89345	0.0420163	0.854721	Up
CL20308Contig1	8.63196	0	17.2639	Inf	Inf	0.0141475	0.496422	Up
CL20313Contig1	6.81471	0	13.6294	Inf	Inf	0.0356133	0.798886	Up
CL20337Contig1	14.0837	0	28.1675	Inf	Inf	0.00127525	0.112649	Up
CL20351Contig1	11.8122	0	23.6243	Inf	Inf	0.00328143	0.208879	Up
CL20387Contig1	9.9949	0	19.9898	Inf	Inf	0.0074025	0.353084	Up
CL20425Contig1	16.0929	2.20112	29.9847	13.6225	3.76792	0.00929952	0.400548	Up
CL2045Contig1	28.2185	11.0056	45.4314	4.12802	2.04545	0.0467078	0.899345	Up
CL2046Contig1	265.119	133.168	397.07	2.98173	1.57615	0.0197087	0.606201	Up	gi|543375077|ref|XP_005530751.1|PREDICTED: protein notum homolog [Pseudopodoces humilis]	0	sp|Q8R116|NOTUM_MOUSE	0	Protein notum homolog OS=Mus musculus GN=Notum PE=2 SV=2	KOG4287	0	Pectin acetylesterase and similar proteins
CL20537Contig1	948.549	535.973	1361.12	2.53954	1.34457	0.0139933	0.496422	Up	gi|514762620|ref|XP_005023535.1|PREDICTED: peptidyl-prolyl cis-trans isomerase FKBP5 isoform X3 [Anas platyrhynchos]	1.65164e-46	sp|Q13451|FKBP5_HUMAN	5e-47	Peptidyl-prolyl cis-trans isomerase FKBP5 OS=Homo sapiens GN=FKBP5 PE=1 SV=2	KOG0543	1e-47	FKBP-type peptidyl-prolyl cis-trans isomerase		GO:0005528;GO:0031072;GO:0000413;GO:0016020;GO:0005634;GO:0061077;GO:0003755	FK506 binding|heat shock protein binding|protein peptidyl-prolyl isomerization|membrane|nucleus|chaperone-mediated protein folding|peptidyl-prolyl cis-trans isomerase activity
CL20545Contig1	22.9076	2.20112	43.6141	19.8145	4.30848	0.0011932	0.107668	Up
CL20575Contig1	15.2803	3.30168	27.2588	8.25604	3.04545	0.0276849	0.71455	Up
CL20579Contig1	25.8254	4.40224	47.2486	10.7329	3.42396	0.00338275	0.213173	Up
CL20627Contig1	9.18224	1.10056	17.2639	15.6865	3.97145	0.0421992	0.857455	Up	gi|483499658|gb|EOA94464.1|Eukaryotic translation initiation factor 1 [Anas platyrhynchos]	7.69912e-10
CL20635Contig1	10.9035	0	21.8071	Inf	Inf	0.00489571	0.276991	Up	gi|493670967|ref|WP_006621308.1|Na-Ca exchanger/integrin-beta4 [Arthrospira platensis] >gi|406715851|gb|EKD11004.1| Na-Ca exchanger/integrin-beta4 [Arthrospira platensis C1]	2.31709e-18	sp|Q8T4N5|TSEP_GLOPP	3e-13	Protein TsetseEP OS=Glossina palpalis palpalis PE=4 SV=1	KOG4293	1e-15	Predicted membrane protein, contains DoH and Cytochrome b-561/ferric reductase transmembrane domains		GO:0030054;GO:0005509;GO:0005230;GO:0007214;GO:0007229;GO:0034707;GO:0006508;GO:0005887;GO:0006821;GO:0004890;GO:0005044;GO:0016052;GO:0045211;GO:0042493;GO:0004252;GO:0005254;GO:0030246	cell junction|calcium ion binding|extracellular ligand-gated ion channel activity|gamma-aminobutyric acid signaling pathway|integrin-mediated signaling pathway|chloride channel complex|proteolysis|integral component of plasma membrane|chloride transport|GABA-A receptor activity|scavenger receptor activity|carbohydrate catabolic process|postsynaptic membrane|response to drug|serine-type endopeptid…
CL20638Contig1	11.8122	0	23.6243	Inf	Inf	0.00328143	0.208879	Up	gi|554526593|ref|XP_005858130.1|PREDICTED: secretory carrier-associated membrane protein 1 isoform X2 [Myotis brandtii]	1.14069e-28	sp|O77735|SCAM1_PIG	6e-31	Secretory carrier-associated membrane protein 1 OS=Sus scrofa GN=SCAMP1 PE=2 SV=1	KOG3088	5e-32	Secretory carrier membrane protein		GO:0016021;GO:0006892;GO:0030672;GO:0006887;GO:0005515;GO:0005802;GO:0055038;GO:0042589;GO:0015031	integral component of membrane|post-Golgi vesicle-mediated transport|synaptic vesicle membrane|exocytosis|protein binding|trans-Golgi network|recycling endosome membrane|zymogen granule membrane|protein transport
CL20703Contig1	9.08628	0	18.1726	Inf	Inf	0.0113559	0.443242	Up	gi|543744813|ref|XP_005513216.1|PREDICTED: echinoderm microtubule-associated protein-like 6 [Columba livia]	2.81084e-91	sp|Q5SQM0|EMAL6_MOUSE	3e-97	Echinoderm microtubule-associated protein-like 6 OS=Mus musculus GN=Eml6 PE=2 SV=1	KOG2106	1e-85	Uncharacterized conserved protein, contains HELP and WD40 domains
CL20711Contig1	13.9173	3.30168	24.5329	7.43044	2.89345	0.0420163	0.854721	Up
CL20750Contig1	1474.85	501.856	2447.84	4.87758	2.28617	1.85955e-05	0.00454515	Up	gi|513219083|ref|XP_004947339.1|PREDICTED: helicase with zinc finger domain 2 isoform X5 [Gallus gallus]	0	sp|E9QAM5|HELZ2_MOUSE	0	Helicase with zinc finger domain 2 OS=Mus musculus GN=Helz2 PE=1 SV=1	KOG2102	0	Exosomal 3'-5' exoribonuclease complex, subunit Rrp44/Dis3		GO:0004540;GO:0046872;GO:0043141;GO:0003723	ribonuclease activity|metal ion binding|ATP-dependent 5'-3' DNA helicase activity|RNA binding
CL20790Contig1	39.9796	0	79.9592	Inf	Inf	7.66304e-07	0.000306223	Up
CL20805Contig1	606.722	320.263	893.181	2.7889	1.47969	0.0115656	0.448296	Up	gi|449494082|ref|XP_002196354.2|PREDICTED: CCAAT/enhancer-binding protein delta [Taeniopygia guttata]	1.09974e-39	sp|Q03484|CEBPD_RAT	3e-39	CCAAT/enhancer-binding protein delta OS=Rattus norvegicus GN=Cebpd PE=2 SV=1	KOG3119	3e-39	Basic region leucine zipper transcription factor		GO:0045944;GO:0044212;GO:0045669;GO:0043565;GO:0048839;GO:0003700;GO:0046982;GO:0042803;GO:0045892;GO:0005634;GO:0006351;GO:0045444	positive regulation of transcription from RNA polymerase II promoter|transcription regulatory region DNA binding|positive regulation of osteoblast differentiation|sequence-specific DNA binding|inner ear development|sequence-specific DNA binding transcription factor activity|protein heterodimerization activity|protein homodimerization activity|negative regulation of transcription, DNA-templated|nu…
CL20835Contig1	36.3451	0	72.6902	Inf	Inf	1.62424e-06	0.00057593	Up	gi|514760887|ref|XP_005023124.1|PREDICTED: heterogeneous nuclear ribonucleoprotein K-like [Anas platyrhynchos]	1.2188e-11
CL20836Contig1	13.463	3.30168	23.6243	7.15524	2.839	0.0483853	0.9183	Up
CL20850Contig1	11.3578	0	22.7157	Inf	Inf	0.00400164	0.238728	Up
CL20891Contig1	21.8326	5.5028	38.1624	6.93507	2.79391	0.0174461	0.570777	Up
CL20906Contig1	12.2665	0	24.5329	Inf	Inf	0.00269957	0.184181	Up
CL2092Contig1	26.3757	5.5028	47.2486	8.58628	3.10203	0.00598375	0.315164	Up
CL2096Contig1	265.554	148.576	382.532	2.57466	1.36438	0.0422328	0.857792	Up	gi|483519265|gb|EOB05108.1|hypothetical protein Anapl_03531 [Anas platyrhynchos]	4.90669e-07
CL20980Contig1	7.26902	0	14.538	Inf	Inf	0.0280724	0.71455	Up
CL21001Contig1	17.2639	0	34.5278	Inf	Inf	0.000378551	0.0471793	Up
CL21046Contig1	13.1751	0	26.3502	Inf	Inf	0.00184436	0.142213	Up
CL21132Contig1	15.1843	2.20112	28.1675	12.7969	3.67772	0.0124928	0.466288	Up
CL21141Contig1	26.5677	7.70393	45.4314	5.89717	2.56002	0.0178457	0.576362	Up
CL21150Contig1	7.26902	0	14.538	Inf	Inf	0.0280724	0.71455	Up
CL21305Contig1	11.5498	2.20112	20.8984	9.49445	3.24708	0.0430018	0.863938	Up
CL21316Contig1	28.7433	6.60337	50.8831	7.70564	2.94591	0.00661309	0.330333	Up
CL21345Contig1	13.6294	0	27.2588	Inf	Inf	0.0015314	0.125993	Up
CL21405Contig1	10.9035	0	21.8071	Inf	Inf	0.00489571	0.276991	Up
CL21418Contig1	12.2665	0	24.5329	Inf	Inf	0.00269957	0.184181	Up
CL21443Contig1	22.4788	7.70393	37.2537	4.83568	2.27372	0.042755	0.863744	Up
CL21462Contig1	15.7346	3.30168	28.1675	8.53124	3.09276	0.0241338	0.662986	Up
CL21524Contig1	12.0041	2.20112	21.8071	9.90725	3.30848	0.0366533	0.804503	Up
CL21584Contig1	2182.56	359.883	4005.23	11.1292	3.47628	1.36482e-10	1.80843e-07	Up	gi|6723273|dbj|BAA89659.1|gag-pol precursor polyprotein [Baboon endogenous virus strain M7]	0	sp|P03355|POL_MLVMS	0	Gag-Pol polyprotein OS=Moloney murine leukemia virus (isolate Shinnick) GN=gag-pol PE=1 SV=4	KOG0017	2e-73	FOG: Transposon-encoded proteins with TYA, reverse transcriptase, integrase domains in various combinations		GO:0046718;GO:0019013;GO:0090305;GO:0039660;GO:0003723;GO:0006310;GO:0008270;GO:0019048;GO:0006278;GO:0019068;GO:0003887;GO:0003964;GO:0004523;GO:0003677;GO:0006508;GO:0075713;GO:0019031;GO:0004190;GO:0020002;GO:0015074;GO:0016020	viral entry into host cell|viral nucleocapsid|nucleic acid phosphodiester bond hydrolysis|structural constituent of virion|RNA binding|DNA recombination|zinc ion binding|modulation by virus of host morphology or physiology|RNA-dependent DNA replication|virion assembly|DNA-directed DNA polymerase activity|RNA-directed DNA polymerase activity|RNA-DNA hybrid ribonuclease activity|DNA binding|proteol…
CL21655Contig1	21.0904	2.20112	39.9796	18.1633	4.18295	0.00200554	0.150943	Up
CL21684Contig1	15.7346	3.30168	28.1675	8.53124	3.09276	0.0241338	0.662986	Up
CL21736Contig1	9.08628	0	18.1726	Inf	Inf	0.0113559	0.443242	Up
CL21782Contig1	38.5717	9.90505	67.2384	6.7883	2.76305	0.00522997	0.286886	Up
CL2179Contig1	48.2338	16.5084	79.9592	4.84354	2.27606	0.0131256	0.482751	Up
CL21801Contig1	15.1843	2.20112	28.1675	12.7969	3.67772	0.0124928	0.466288	Up
CL2186Contig1	60.5963	17.609	103.584	5.88243	2.55641	0.00436845	0.255667	Up
CL21872Contig1	18.5564	4.40224	32.7106	7.43044	2.89345	0.0216536	0.641504	Up
CL21877Contig1	13.463	3.30168	23.6243	7.15524	2.839	0.0483853	0.9183	Up
CL21887Contig1	7.26902	0	14.538	Inf	Inf	0.0280724	0.71455	Up
CL21909Contig1	12.2665	0	24.5329	Inf	Inf	0.00269957	0.184181	Up
CL21916Contig1	20.0153	5.5028	34.5278	6.27459	2.64952	0.0273481	0.713473	Up
CL21917Contig1	1214.92	626.219	1803.63	2.88018	1.52616	0.004156	0.245609	Up	gi|513223489|ref|XP_001233613.3|PREDICTED: EF-hand calcium-binding domain-containing protein 12-like [Gallus gallus]	7.43684e-26	sp|Q5XIN9|CCD81_RAT	1e-09	Coiled-coil domain-containing protein 81 OS=Rattus norvegicus GN=Ccdc81 PE=2 SV=1
CL21926Contig1	15.4467	0	30.8933	Inf	Inf	0.000748123	0.0771901	Up
CL21955Contig1	14.9924	0	29.9847	Inf	Inf	0.000891641	0.0870059	Up
CL21961Contig1	6.36039	0	12.7208	Inf	Inf	0.0454118	0.885449	Up
CL21984Contig1	14.0837	0	28.1675	Inf	Inf	0.00127525	0.112649	Up
CL21995Contig1	10.9035	0	21.8071	Inf	Inf	0.00489571	0.276991	Up	gi|490303601|ref|WP_004198930.1|exodeoxyribonuclease V subunit gamma [Burkholderia mallei] >gi|238520003|gb|EEP83467.1| exodeoxyribonuclease V, gamma subunit [Burkholderia mallei GB8 horse 4]	4.83453e-19	sp|P11414|RPB1_CRIGR	7e-13	DNA-directed RNA polymerase II subunit RPB1 (Fragment) OS=Cricetulus griseus GN=POLR2A PE=3 SV=1	KOG0260	2e-13	RNA polymerase II, large subunit		GO:0009986;GO:0005882;GO:0005509;GO:0007165;GO:0008603;GO:0005198	cell surface|intermediate filament|calcium ion binding|signal transduction|cAMP-dependent protein kinase regulator activity|structural molecule activity
CL22044Contig1	1935.86	83.6426	3788.07	45.2887	5.50108	1.56815e-19	1.12797e-15	Up	gi|514773054|ref|XP_005026016.1|PREDICTED: interferon-induced GTP-binding protein Mx-like isoform X2 [Anas platyrhynchos]	4.24339e-139	sp|P33238|MX_ANAPL	6e-156	Interferon-induced GTP-binding protein Mx OS=Anas platyrhynchos GN=MX PE=2 SV=1	KOG0446	6e-89	Vacuolar sorting protein VPS1, dynamin, and related proteins	ko05162, Measles;ko05164, Influenza A;	GO:0006184;GO:0003924;GO:0005737;GO:0005634;GO:0005525	GTP catabolic process|GTPase activity|cytoplasm|nucleus|GTP binding
CL22138Contig1	14.3716	3.30168	25.4416	7.70564	2.94591	0.0365248	0.804503	Up
CL2218Contig1	60.0011	26.4135	93.5886	3.54322	1.82506	0.0350709	0.798886	Up
CL22228Contig1	550.6	228.917	872.282	3.81048	1.92997	0.0013824	0.118578	Up	gi|514763391|ref|XP_005023725.1|PREDICTED: immunoglobulin superfamily member 10 isoform X1 [Anas platyrhynchos]	0	sp|Q6WRI0|IGS10_HUMAN	0	Immunoglobulin superfamily member 10 OS=Homo sapiens GN=IGSF10 PE=2 SV=1	KOG0619	2e-123	FOG: Leucine rich repeat
CL22265Contig1	19.0812	0	38.1624	Inf	Inf	0.000197827	0.0290402	Up
CL22285Contig1	16.8096	0	33.6192	Inf	Inf	0.000447457	0.0530115	Up
CL22323Contig1	9.54059	0	19.0812	Inf	Inf	0.00915128	0.397564	Up
CL22359Contig1	47.5621	8.80449	86.3196	9.80405	3.29338	0.000821864	0.0821064	Up	gi|355748191|gb|EHH52674.1|hypothetical protein EGM_13164, partial [Macaca fascicularis]	7.59116e-15
CL2235Contig1	42.7821	16.5084	69.0557	4.18306	2.06456	0.0261386	0.698669	Up
CL22403Contig1	23.1955	5.5028	40.8882	7.43044	2.89345	0.01255	0.467731	Up
CL22406Contig1	20.1817	2.20112	38.1624	17.3377	4.11584	0.00262034	0.182233	Up
CL22407Contig1	11.5498	2.20112	20.8984	9.49445	3.24708	0.0430018	0.863938	Up
CL22454Contig1	97.6897	41.8213	153.558	3.67177	1.87647	0.0191851	0.602888	Up	gi|514764802|ref|XP_005024063.1|PREDICTED: ectonucleotide pyrophosphatase/phosphodiesterase family member 2 isoform X4 [Anas platyrhynchos]	0	sp|Q13822|ENPP2_HUMAN	0	Ectonucleotide pyrophosphatase/phosphodiesterase family member 2 OS=Homo sapiens GN=ENPP2 PE=1 SV=3	KOG2645	0	Type I phosphodiesterase/nucleotide pyrophosphatase		GO:0006955;GO:0046872;GO:0003676;GO:0030247;GO:0008152;GO:0016787;GO:0005044	immune response|metal ion binding|nucleic acid binding|polysaccharide binding|metabolic process|hydrolase activity|scavenger receptor activity
CL22497Contig1	10.4492	0	20.8984	Inf	Inf	0.00600958	0.315164	Up
CL22500Contig1	1000.16	7.70393	1992.62	258.65	8.01486	1.71973e-24	2.88634e-20	Up	gi|356950524|gb|AEF79983.1|immunoglobulin alpha heavy chain, partial [Anser anser domesticus]	0	sp|P20768|IGHM_SUNMU	9e-73	Ig mu chain C region OS=Suncus murinus PE=4 SV=1				ko04145, Phagosome;ko04020, Calcium signaling pathway;ko04064, NF-kappa B signaling pathway;ko04151, PI3K-Akt signaling pathway;ko05202, Transcriptional misregulation in cancers;ko05414, Dilated cardiomyopathy (DCM);ko05416, Viral myocarditis;ko05310, Asthma;ko05320, Autoimmune thyroid disease;ko05322, Systemic lupus erythematosus;ko05323, Rheumatoid arthritis;ko05330, Allograft rejection;ko05340…
CL22526Contig1	14.73	2.20112	27.2588	12.3841	3.63041	0.0145054	0.505091	Up
CL22546Contig1	18.3645	2.20112	34.5278	15.6865	3.97145	0.00454286	0.263219	Up
CL22579Contig1	6.81471	0	13.6294	Inf	Inf	0.0356133	0.798886	Up
CL22606Contig1	2059.78	1275.55	2844	2.22963	1.1568	0.0205521	0.627163	Up	gi|514711441|ref|XP_005011588.1|PREDICTED: uncharacterized protein LOC101791571 isoform X1 [Anas platyrhynchos]	1.51067e-101	sp|Q0P5N6|ARL16_HUMAN	2e-61	ADP-ribosylation factor-like protein 16 OS=Homo sapiens GN=ARL16 PE=2 SV=1	KOG0072	4e-11	GTP-binding ADP-ribosylation factor-like protein ARL1		GO:0005525;GO:0005622;GO:0007264	GTP binding|intracellular|small GTPase mediated signal transduction
CL22612Contig1	6.36039	0	12.7208	Inf	Inf	0.0454118	0.885449	Up
CL22628Contig1	6.36039	0	12.7208	Inf	Inf	0.0454118	0.885449	Up
CL22664Contig1	21.3783	5.5028	37.2537	6.76995	2.75915	0.0195001	0.604286	Up
CL22681Contig1	341.066	149.676	532.456	3.55738	1.83082	0.00495012	0.277831	Up	gi|432119850|gb|ELK38641.1|Nuclear prelamin A recognition factor [Myotis davidii]	1.09827e-20
CL22750Contig1	20.3737	4.40224	36.3451	8.25604	3.04545	0.0133244	0.488637	Up
CL22773Contig1	9.9949	0	19.9898	Inf	Inf	0.0074025	0.353084	Up
CL22814Contig1	6.81471	0	13.6294	Inf	Inf	0.0356133	0.798886	Up
CL22846Contig1	7.26902	0	14.538	Inf	Inf	0.0280724	0.71455	Up
CL22905Contig1	12.9127	2.20112	23.6243	10.7329	3.42396	0.026747	0.70668	Up	gi|483271765|gb|EOA92607.1|Interphotoreceptor matrix proteoglycan 2, partial [Anas platyrhynchos]	6.30053e-56	sp|Q1XI86|IMPG2_CHICK	3e-54	Interphotoreceptor matrix proteoglycan 2 OS=Gallus gallus GN=IMPG2 PE=1 SV=1					GO:0016021;GO:0008201;GO:0005540	integral component of membrane|heparin binding|hyaluronic acid binding
CL22915Contig1	6.81471	0	13.6294	Inf	Inf	0.0356133	0.798886	Up
CL22952Contig1	15.6386	2.20112	29.0761	13.2097	3.72352	0.0107721	0.432868	Up
CL22980Contig1	6.81471	0	13.6294	Inf	Inf	0.0356133	0.798886	Up
CL23072Contig1	12.2665	0	24.5329	Inf	Inf	0.00269957	0.184181	Up
CL2315Contig1	98.9822	46.2236	151.741	3.28276	1.71491	0.0309393	0.756592	Up
CL23169Contig1	21.0904	2.20112	39.9796	18.1633	4.18295	0.00200554	0.150943	Up
CL23177Contig1	13.8213	2.20112	25.4416	11.5585	3.53088	0.0196365	0.604351	Up
CL23180Contig1	14.0837	0	28.1675	Inf	Inf	0.00127525	0.112649	Up
CL23209Contig1	15.901	0	31.802	Inf	Inf	0.000629023	0.0691796	Up
CL2324Contig1	44.7402	7.70393	81.7765	10.6149	3.40802	0.000702489	0.0747802	Up
CL23270Contig1	9.54059	0	19.0812	Inf	Inf	0.00915128	0.397564	Up
CL23321Contig1	14.3716	3.30168	25.4416	7.70564	2.94591	0.0365248	0.804503	Up
CL2332Contig1	21.8326	5.5028	38.1624	6.93507	2.79391	0.0174461	0.570777	Up
CL2332Contig2	86.1399	39.6202	132.66	3.34828	1.74342	0.03218	0.765805	Up
CL23341Contig1	21.4742	6.60337	36.3451	5.50403	2.46049	0.0330555	0.775212	Up	gi|431920743|gb|ELK18516.1|TBC1 domain family member 17 [Pteropus alecto]	5.92069e-22	sp|Q9HA65|TBC17_HUMAN	7e-27	TBC1 domain family member 17 OS=Homo sapiens GN=TBC1D17 PE=1 SV=2	KOG2197	2e-27	Ypt/Rab-specific GTPase-activating protein GYP7 and related proteins		GO:0005097;GO:0032851	Rab GTPase activator activity|positive regulation of Rab GTPase activity
CL23373Contig1	14.3716	3.30168	25.4416	7.70564	2.94591	0.0365248	0.804503	Up
CL23392Contig1	32.0449	13.2067	50.8831	3.85282	1.94591	0.0486348	0.921153	Up
CL23457Contig1	1210.05	632.823	1787.27	2.82428	1.49789	0.00489606	0.276991	Up
CL23497Contig1	9.08628	0	18.1726	Inf	Inf	0.0113559	0.443242	Up
CL23527Contig1	33.4079	13.2067	53.609	4.05922	2.0212	0.039096	0.833789	Up
CL23599Contig1	14.538	0	29.0761	Inf	Inf	0.00106496	0.0983885	Up
CL23607Contig1	12.0041	2.20112	21.8071	9.90725	3.30848	0.0366533	0.804503	Up
CL2361Contig1	841.664	451.23	1232.1	2.73053	1.44918	0.00937544	0.400838	Up	gi|483515531|gb|EOB02757.1|Uncharacterized protein C2orf65, partial [Anas platyrhynchos]	3.02333e-29	sp|Q9Z0E1|M1AP_MOUSE	7e-18	Meiosis 1 arrest protein OS=Mus musculus GN=M1ap PE=2 SV=2
CL23632Contig1	6.81471	0	13.6294	Inf	Inf	0.0356133	0.798886	Up
CL23666Contig1	6.36039	0	12.7208	Inf	Inf	0.0454118	0.885449	Up	gi|449282026|gb|EMC88946.1|hypothetical protein A306_02137 [Columba livia]	6.96369e-07
CL23755Contig1	12.2665	0	24.5329	Inf	Inf	0.00269957	0.184181	Up
CL23784Contig1	17.1935	4.40224	29.9847	6.81123	2.76792	0.0314284	0.759334	Up
CL237Contig1	64.9985	26.4135	103.584	3.92162	1.97145	0.0219475	0.642775	Up
CL23864Contig1	17.0015	2.20112	31.802	14.4481	3.85281	0.00695631	0.342048	Up
CL23868Contig1	17.2639	0	34.5278	Inf	Inf	0.000378551	0.0471793	Up
CL23888Contig1	8.63196	0	17.2639	Inf	Inf	0.0141475	0.496422	Up
CL23893Contig1	8.17765	0	16.3553	Inf	Inf	0.0176986	0.572712	Up
CL23914Contig1	17.1935	4.40224	29.9847	6.81123	2.76792	0.0314284	0.759334	Up
CL2395Contig1	55.3619	25.3129	85.411	3.37421	1.75455	0.0448765	0.883792	Up	gi|513229794|ref|XP_424789.4|PREDICTED: rho guanine nucleotide exchange factor 28 [Gallus gallus]	2.00778e-116	sp|Q8N1W1|ARG28_HUMAN	1e-57	Rho guanine nucleotide exchange factor 28 OS=Homo sapiens GN=ARHGEF28 PE=1 SV=3	KOG3520	3e-55	Predicted guanine nucleotide exchange factor		GO:0005089;GO:0035556;GO:0046872;GO:0005543;GO:0060052;GO:0035023;GO:0021955	Rho guanyl-nucleotide exchange factor activity|intracellular signal transduction|metal ion binding|phospholipid binding|neurofilament cytoskeleton organization|regulation of Rho protein signal transduction|central nervous system neuron axonogenesis
CL24051Contig1	18.5564	4.40224	32.7106	7.43044	2.89345	0.0216536	0.641504	Up
CL24117Contig1	575.419	310.358	840.481	2.7081	1.43728	0.0148694	0.514918	Up
CL24161Contig1	6.81471	0	13.6294	Inf	Inf	0.0356133	0.798886	Up
CL24171Contig1	14.8259	3.30168	26.3502	7.98084	2.99654	0.0317853	0.760062	Up
CL24233Contig1	7.72333	0	15.4467	Inf	Inf	0.0222382	0.642775	Up
CL24237Contig1	8.63196	0	17.2639	Inf	Inf	0.0141475	0.496422	Up	gi|483496480|gb|EOA93709.1|hypothetical protein Anapl_11404 [Anas platyrhynchos]	7.03679e-08
CL24238Contig1	125.742	56.1286	195.355	3.48049	1.79929	0.0192371	0.60387	Up	gi|530658293|ref|XP_005314677.1|PREDICTED: uncharacterized protein LOC101937828 [Chrysemys picta bellii]	4.59408e-11	sp|P10272|POL_BAEVM	5e-10	Pol polyprotein OS=Baboon endogenous virus (strain M7) GN=pol PE=3 SV=1	KOG0017	7e-11	FOG: Transposon-encoded proteins with TYA, reverse transcriptase, integrase domains in various combinations
CL24240Contig1	13.463	3.30168	23.6243	7.15524	2.839	0.0483853	0.9183	Up	gi|527272033|ref|XP_005153868.1|PREDICTED: inhibin beta B chain [Melopsittacus undulatus]	1.55352e-127	sp|P27093|INHBB_CHICK	2e-163	Inhibin beta B chain OS=Gallus gallus GN=INHBB PE=2 SV=2	KOG3900	1e-148	Transforming growth factor beta, bone morphogenetic protein and related proteins	ko04550, Signaling pathways regulating pluripotency of stem cells;ko04350, TGF-beta signaling pathway;ko04060, Cytokine-cytokine receptor interaction;	GO:0046881;GO:0008083;GO:0032869;GO:0042981;GO:0060279;GO:0040007;GO:0009612;GO:0044320;GO:0046676;GO:0005576;GO:0045444;GO:0046882;GO:0005179;GO:0048178;GO:0048471;GO:0042803;GO:0048599;GO:0032924;GO:0009267	positive regulation of follicle-stimulating hormone secretion|growth factor activity|cellular response to insulin stimulus|regulation of apoptotic process|positive regulation of ovulation|growth|response to mechanical stimulus|cellular response to leptin stimulus|negative regulation of insulin secretion|extracellular region|fat cell differentiation|negative regulation of follicle-stimulating horm…
CL24286Contig1	7.72333	0	15.4467	Inf	Inf	0.0222382	0.642775	Up
CL24326Contig1	11.3578	0	22.7157	Inf	Inf	0.00400164	0.238728	Up
CL24335Contig1	6.36039	0	12.7208	Inf	Inf	0.0454118	0.885449	Up
CL24345Contig1	12.0041	2.20112	21.8071	9.90725	3.30848	0.0366533	0.804503	Up
CL24359Contig1	12.9127	2.20112	23.6243	10.7329	3.42396	0.026747	0.70668	Up	gi|513237510|ref|XP_004950471.1|PREDICTED: uncharacterized protein LOC101749953 [Gallus gallus]	3.43864e-06
CL24362Contig1	7.26902	0	14.538	Inf	Inf	0.0280724	0.71455	Up
CL24413Contig1	11.5498	2.20112	20.8984	9.49445	3.24708	0.0430018	0.863938	Up	gi|6576738|dbj|BAA88337.1|ORF2 [Acanthochelys spixii]	8.83449e-15
CL24418Contig1	14.3716	3.30168	25.4416	7.70564	2.94591	0.0365248	0.804503	Up
CL24432Contig1	9.54059	0	19.0812	Inf	Inf	0.00915128	0.397564	Up
CL24437Contig1	11.5498	2.20112	20.8984	9.49445	3.24708	0.0430018	0.863938	Up	gi|302684663|ref|XP_003032012.1|hypothetical protein SCHCODRAFT_108660 [Schizophyllum commune H4-8] >gi|300105705|gb|EFI97109.1| hypothetical protein SCHCODRAFT_108660, partial [Schizophyllum commune H4-8]	9.16737e-07
CL24441Contig1	12.0041	2.20112	21.8071	9.90725	3.30848	0.0366533	0.804503	Up
CL24459Contig1	13.6294	0	27.2588	Inf	Inf	0.0015314	0.125993	Up
CL24461Contig1	13.1751	0	26.3502	Inf	Inf	0.00184436	0.142213	Up			sp|Q6QI06|RICTR_MOUSE	3e-06	Rapamycin-insensitive companion of mTOR OS=Mus musculus GN=Rictor PE=1 SV=2
CL24486Contig1	8.63196	0	17.2639	Inf	Inf	0.0141475	0.496422	Up
CL24532Contig1	21.2823	4.40224	38.1624	8.66884	3.11584	0.0105059	0.42798	Up
CL24558Contig1	9.08628	0	18.1726	Inf	Inf	0.0113559	0.443242	Up
CL24608Contig1	14874.2	8632.8	21115.6	2.44597	1.29041	0.0104372	0.426563	Up	gi|483523759|gb|EOB07956.1|Inhibitor of apoptosis protein, partial [Anas platyrhynchos]	0	sp|Q90660|BIR_CHICK	0	Inhibitor of apoptosis protein OS=Gallus gallus GN=ITA PE=2 SV=1	KOG1101	0	Apoptosis inhibitor IAP1 and related BIR domain proteins	ko04210, Apoptosis;ko04510, Focal adhesion;ko04064, NF-kappa B signaling pathway;ko04668, TNF signaling pathway;ko04120, Ubiquitin mediated proteolysis;ko05200, Pathways in cancer;ko05222, Small cell lung cancer;ko05145, Toxoplasmosis;ko04621, NOD-like receptor signaling pathway;	GO:0005737;GO:0043066;GO:0005634;GO:0008270;GO:0006915	cytoplasm|negative regulation of apoptotic process|nucleus|zinc ion binding|apoptotic process
CL24631Contig1	14.538	0	29.0761	Inf	Inf	0.00106496	0.0983885	Up
CL24639Contig1	12.7208	0	25.4416	Inf	Inf	0.00222793	0.160484	Up
CL24702Contig1	13.463	3.30168	23.6243	7.15524	2.839	0.0483853	0.9183	Up
CL24795Contig1	277.936	134.268	421.603	3.14	1.65077	0.0139989	0.496422	Up	gi|399164|sp|P32017.1|CO9A3_CHICKRecName: Full=Collagen alpha-3(IX) chain; Flags: Precursor >gi|211041|gb|AAB59960.1| alpha-3 type IX collagen [Gallus gallus]	6.2743e-69	sp|P32017|CO9A3_CHICK	7e-76	Collagen alpha-3(IX) chain OS=Gallus gallus GN=COL9A3 PE=2 SV=1	KOG3544	2e-55	Collagens (type IV and type XIII), and related proteins	ko04974, Protein digestion and absorption;	GO:0005201;GO:0005594	extracellular matrix structural constituent|collagen type IX trimer
CL24838Contig1	6.81471	0	13.6294	Inf	Inf	0.0356133	0.798886	Up	gi|514787209|ref|XP_005029207.1|PREDICTED: spectrin beta chain, non-erythrocytic 5, partial [Anas platyrhynchos]	4.14631e-60	sp|Q9NRC6|SPTN5_HUMAN	3e-40	Spectrin beta chain, non-erythrocytic 5 OS=Homo sapiens GN=SPTBN5 PE=1 SV=1	KOG0517	6e-41	Beta-spectrin		GO:0003779;GO:0005543	actin binding|phospholipid binding
CL24900Contig1	16.8096	0	33.6192	Inf	Inf	0.000447457	0.0530115	Up
CL24921Contig1	25.5631	6.60337	44.5228	6.74243	2.75327	0.0130781	0.48171	Up
CL24972Contig1	52.0347	13.2067	90.8628	6.88003	2.78242	0.00287469	0.190403	Up	gi|514768822|ref|XP_005025013.1|PREDICTED: forkhead box protein I1-ema-like isoform X1 [Anas platyrhynchos] >gi|483506338|gb|EOA97440.1| Forkhead box protein I1-ema, partial [Anas platyrhynchos]	7.81068e-73	sp|Q6P8A3|FXI1E_XENTR	6e-55	Forkhead box protein I1-ema OS=Xenopus tropicalis GN=foxi1e PE=2 SV=1	KOG2294	9e-46	Transcription factor of the Forkhead/HNF3 family		GO:0009888;GO:0003690;GO:0045944;GO:0044212;GO:0005667;GO:0008301;GO:0042472;GO:0003705;GO:0000122;GO:0043565;GO:0008134;GO:0007389;GO:0005634;GO:0006351;GO:0051090	tissue development|double-stranded DNA binding|positive regulation of transcription from RNA polymerase II promoter|transcription regulatory region DNA binding|transcription factor complex|DNA binding, bending|inner ear morphogenesis|RNA polymerase II distal enhancer sequence-specific DNA binding transcription factor activity|negative regulation of transcription from RNA polymerase II promoter|se…
CL24980Contig1	9.9949	0	19.9898	Inf	Inf	0.0074025	0.353084	Up	gi|513203334|ref|XP_004944255.1|PREDICTED: uncharacterized protein F13E9.13, mitochondrial-like isoform X12 [Gallus gallus]	6.61346e-13								GO:0003824	catalytic activity
CL25002Contig1	26.6636	8.80449	44.5228	5.05682	2.33823	0.0279828	0.71455	Up
CL2500Contig1	12.2665	0	24.5329	Inf	Inf	0.00269957	0.184181	Up
CL2500Contig2	38.6422	5.5028	71.7816	13.0445	3.70537	0.000507228	0.0588827	Up
CL25028Contig1	12.4584	2.20112	22.7157	10.3201	3.36738	0.0312875	0.758477	Up
CL2502Contig1	24.7504	7.70393	41.7969	5.4254	2.43973	0.026163	0.698669	Up	gi|514771411|ref|XP_005025624.1|PREDICTED: unconventional myosin-Ih [Anas platyrhynchos]	2.45809e-80	sp|Q8N1T3|MYO1H_HUMAN	3e-61	Unconventional myosin-Ih OS=Homo sapiens GN=MYO1H PE=2 SV=2	KOG0164	2e-41	Myosin class I heavy chain		GO:0016459;GO:0005524;GO:0003774	myosin complex|ATP binding|motor activity
CL25064Contig1	6.36039	0	12.7208	Inf	Inf	0.0454118	0.885449	Up
CL25067Contig1	6.81471	0	13.6294	Inf	Inf	0.0356133	0.798886	Up
CL25137Contig1	6.36039	0	12.7208	Inf	Inf	0.0454118	0.885449	Up
CL2513Contig1	64.7106	23.1118	106.309	4.59979	2.20157	0.011429	0.444714	Up
CL25141Contig1	9.9949	0	19.9898	Inf	Inf	0.0074025	0.353084	Up
CL25146Contig1	7847.75	3766.12	11929.4	3.16755	1.66337	0.000714203	0.075548	Up	gi|514771557|ref|XP_005025659.1|PREDICTED: LOW QUALITY PROTEIN: NFX1-type zinc finger-containing protein 1-like [Anas platyrhynchos]	0	sp|Q8R151|ZNFX1_MOUSE	0	NFX1-type zinc finger-containing protein 1 OS=Mus musculus GN=Znfx1 PE=2 SV=3	KOG1807	0	Helicases
CL2517Contig1	54.0633	0	108.127	Inf	Inf	6.89142e-08	4.1806e-05	Up	gi|2331059|gb|AAC60281.1|unknown [Gallus gallus]	2.12159e-19
CL25202Contig1	6.36039	0	12.7208	Inf	Inf	0.0454118	0.885449	Up
CL2523Contig1	32.928	7.70393	58.1522	7.54838	2.91617	0.00507887	0.28257	Up
CL25264Contig1	25.4671	5.5028	45.4314	8.25604	3.04545	0.00736368	0.353084	Up
CL25277Contig1	9.08628	0	18.1726	Inf	Inf	0.0113559	0.443242	Up	gi|45382929|ref|NP_990850.1|sarcoplasmic/endoplasmic reticulum calcium ATPase 1 [Gallus gallus] >gi|114305|sp|P13585.2|AT2A1_CHICK RecName: Full=Sarcoplasmic/endoplasmic reticulum calcium ATPase 1; Short=SERCA1; Short=SR Ca(2+)-ATPase 1; AltName: Full=Calcium pump 1; AltName: Full=Calcium-transporting ATPase sarcoplasmic reticulum type, fast twitch skeletal muscle isoform; AltName: Full=Endoplasm…	2.1091e-40	sp|P13585|AT2A1_CHICK	2e-49	Sarcoplasmic/endoplasmic reticulum calcium ATPase 1 OS=Gallus gallus GN=ATP2A1 PE=2 SV=2	KOG0202	3e-48	Ca2+ transporting ATPase		GO:0008637;GO:0005793;GO:0090076;GO:0031448;GO:0031673;GO:0051561;GO:0005509;GO:0032470;GO:0051659;GO:0033017;GO:0031674;GO:0045988;GO:0016021;GO:0032471;GO:0005388;GO:0048471;GO:0042803;GO:0070059;GO:0006200;GO:0070509;GO:0005524	apoptotic mitochondrial changes|endoplasmic reticulum-Golgi intermediate compartment|relaxation of skeletal muscle|positive regulation of fast-twitch skeletal muscle fiber contraction|H zone|positive regulation of mitochondrial calcium ion concentration|calcium ion binding|positive regulation of endoplasmic reticulum calcium ion concentration|maintenance of mitochondrion location|sarcoplasmic ret…
CL25291Contig1	50.243	18.7095	81.7765	4.37085	2.12791	0.0185768	0.589761	Up	gi|6576738|dbj|BAA88337.1|ORF2 [Acanthochelys spixii]	2.44217e-12
CL25300Contig1	7.72333	0	15.4467	Inf	Inf	0.0222382	0.642775	Up
CL25329Contig1	12.0041	2.20112	21.8071	9.90725	3.30848	0.0366533	0.804503	Up
CL25343Contig1	20.1113	6.60337	33.6192	5.09123	2.34801	0.0455289	0.885449	Up
CL2540Contig1	27.9051	2.20112	53.609	24.3553	4.60617	0.000317775	0.041882	Up
CL25453Contig1	1006.09	581.096	1431.09	2.46274	1.30026	0.0164881	0.546181	Up	gi|513231104|ref|XP_004949296.1|PREDICTED: uncharacterized protein LOC101747628 [Gallus gallus]	2.63648e-53	sp|B6SEH9|ERVV2_HUMAN	2e-12	HERV-V_19q13.41 provirus ancestral Env polyprotein 2 OS=Homo sapiens GN=ERVV-2 PE=2 SV=1					GO:0019031	viral envelope
CL2548Contig1	81.7632	36.3185	127.208	3.50256	1.80841	0.0280397	0.71455	Up
CL25490Contig1	9.08628	0	18.1726	Inf	Inf	0.0113559	0.443242	Up
CL25530Contig1	11.3578	0	22.7157	Inf	Inf	0.00400164	0.238728	Up
CL25556Contig1	11.5498	2.20112	20.8984	9.49445	3.24708	0.0430018	0.863938	Up
CL25572Contig1	7.72333	0	15.4467	Inf	Inf	0.0222382	0.642775	Up
CL25590Contig1	18.6524	5.5028	31.802	5.77923	2.53088	0.0385861	0.827801	Up
CL25696Contig1	7.72333	0	15.4467	Inf	Inf	0.0222382	0.642775	Up
CL25722Contig1	10.9035	0	21.8071	Inf	Inf	0.00489571	0.276991	Up
CL25757Contig1	8.63196	0	17.2639	Inf	Inf	0.0141475	0.496422	Up
CL25892Contig1	53.0393	14.3073	91.7714	6.41431	2.68129	0.00371998	0.2287	Up	gi|483517570|gb|EOB04041.1|hypothetical protein Anapl_04626 [Anas platyrhynchos]	5.442e-08
CL25908Contig1	21.6406	3.30168	39.9796	12.1089	3.59799	0.00442444	0.25814	Up
CL25937Contig1	9.54059	0	19.0812	Inf	Inf	0.00915128	0.397564	Up
CL25955Contig1	1190.29	57.2292	2323.36	40.5975	5.34332	6.44391e-17	3.24457e-13	Up	gi|543288484|ref|XP_005429572.1|PREDICTED: uncharacterized protein LOC102038765, partial [Geospiza fortis]	4.63831e-12	sp|P11283|POL_MMTVC	3e-16	Gag-Pro-Pol polyprotein OS=Mouse mammary tumor virus (strain C3H) GN=gag-pro-pol PE=1 SV=2					GO:0046718;GO:0019013;GO:0090305;GO:0039660;GO:0003723;GO:0006310;GO:0008270;GO:0006278;GO:0003887;GO:0003964;GO:0004523;GO:0003677;GO:0006508;GO:0075713;GO:0046080;GO:0000166;GO:0004190;GO:0015074	viral entry into host cell|viral nucleocapsid|nucleic acid phosphodiester bond hydrolysis|structural constituent of virion|RNA binding|DNA recombination|zinc ion binding|RNA-dependent DNA replication|DNA-directed DNA polymerase activity|RNA-directed DNA polymerase activity|RNA-DNA hybrid ribonuclease activity|DNA binding|proteolysis|establishment of integrated proviral latency|dUTP metabolic proc…
CL25959Contig1	21.3783	5.5028	37.2537	6.76995	2.75915	0.0195001	0.604286	Up	gi|527244497|ref|XP_005140594.1|PREDICTED: uncharacterized protein LOC101880728, partial [Melopsittacus undulatus]	5.21985e-109	sp|P10272|POL_BAEVM	2e-52	Pol polyprotein OS=Baboon endogenous virus (strain M7) GN=pol PE=3 SV=1	KOG0017	6e-13	FOG: Transposon-encoded proteins with TYA, reverse transcriptase, integrase domains in various combinations
CL25972Contig1	14.0837	0	28.1675	Inf	Inf	0.00127525	0.112649	Up
CL25977Contig1	12.0041	2.20112	21.8071	9.90725	3.30848	0.0366533	0.804503	Up
CL25991Contig1	10.4492	0	20.8984	Inf	Inf	0.00600958	0.315164	Up
CL26124Contig1	20.0153	5.5028	34.5278	6.27459	2.64952	0.0273481	0.713473	Up
CL26134Contig1	10.4492	0	20.8984	Inf	Inf	0.00600958	0.315164	Up
CL2616Contig1	314.773	181.593	447.953	2.4668	1.30264	0.04524	0.885449	Up
CL26203Contig1	1201.47	664.739	1738.2	2.61487	1.38674	0.00904292	0.397564	Up	gi|514716050|ref|XP_005012697.1|PREDICTED: von Willebrand factor isoform X1 [Anas platyrhynchos]	0	sp|Q28295|VWF_CANFA	0	von Willebrand factor OS=Canis familiaris GN=VWF PE=1 SV=2	KOG1216	0	von Willebrand factor and related coagulation proteins	ko04510, Focal adhesion;ko04151, PI3K-Akt signaling pathway;ko04512, ECM-receptor interaction;ko04610, Complement and coagulation cascades;ko04611, Platelet activation;	GO:0047485;GO:0009897;GO:0051087;GO:0001889;GO:0001948;GO:0051260;GO:0001890;GO:0002020;GO:0033093;GO:0019865;GO:0005518;GO:0005178;GO:0031012;GO:0042803;GO:0005576;GO:0005783;GO:0007596;GO:0031589	protein N-terminus binding|external side of plasma membrane|chaperone binding|liver development|glycoprotein binding|protein homooligomerization|placenta development|protease binding|Weibel-Palade body|immunoglobulin binding|collagen binding|integrin binding|extracellular matrix|protein homodimerization activity|extracellular region|endoplasmic reticulum|blood coagulation|cell-substrate adhesion
CL26280Contig1	27.8346	6.60337	49.0659	7.43044	2.89345	0.00800574	0.373468	Up
CL26282Contig1	12.2665	0	24.5329	Inf	Inf	0.00269957	0.184181	Up
CL26285Contig1	1303.77	858.438	1749.11	2.03755	1.02683	0.0490967	0.924655	Up	gi|513167101|ref|XP_001231540.3|PREDICTED: sterol regulatory element-binding protein cleavage-activating protein isoform X1 [Gallus gallus]	0	sp|P97260|SCAP_CRIGR	0	Sterol regulatory element-binding protein cleavage-activating protein OS=Cricetulus griseus GN=SCAP PE=1 SV=1	KOG1933	0	Cholesterol transport protein (Niemann-Pick C disease protein)		GO:0016021	integral component of membrane
CL26318Contig1	9.54059	0	19.0812	Inf	Inf	0.00915128	0.397564	Up
CL26343Contig1	25.0128	5.5028	44.5228	8.09092	3.0163	0.00817894	0.377815	Up
CL26344Contig1	15.6386	2.20112	29.0761	13.2097	3.72352	0.0107721	0.432868	Up	gi|524992234|ref|XP_005043972.1|PREDICTED: uncharacterized protein LOC101817921, partial [Ficedula albicollis]	1.7475e-24	sp|Q7LDI9|GAK2_HUMAN	2e-20	HERV-K_7p22.1 provirus ancestral Gag polyprotein OS=Homo sapiens GN=ERVK6 PE=1 SV=3	KOG4400	7e-08	E3 ubiquitin ligase interacting with arginine methyltransferase		GO:0019028;GO:0003723;GO:0008270;GO:0006278;GO:0005730;GO:0003887;GO:0003964;GO:0004523;GO:0006508;GO:0046080;GO:0019031;GO:0004190;GO:0016032;GO:0005198;GO:0005737;GO:0005886;GO:0051028	viral capsid|RNA binding|zinc ion binding|RNA-dependent DNA replication|nucleolus|DNA-directed DNA polymerase activity|RNA-directed DNA polymerase activity|RNA-DNA hybrid ribonuclease activity|proteolysis|dUTP metabolic process|viral envelope|aspartic-type endopeptidase activity|viral process|structural molecule activity|cytoplasm|plasma membrane|mRNA transport
CL26374Contig1	30.8484	9.90505	51.7918	5.22883	2.38649	0.0195024	0.604286	Up
CL26391Contig1	15.6386	2.20112	29.0761	13.2097	3.72352	0.0107721	0.432868	Up
CL26459Contig1	7.72333	0	15.4467	Inf	Inf	0.0222382	0.642775	Up
CL26464Contig1	17.0015	2.20112	31.802	14.4481	3.85281	0.00695631	0.342048	Up
CL26503Contig1	12.0041	2.20112	21.8071	9.90725	3.30848	0.0366533	0.804503	Up
CL26771Contig1	12.4584	2.20112	22.7157	10.3201	3.36738	0.0312875	0.758477	Up	gi|483525043|gb|EOB08794.1|hypothetical protein Anapl_02263 [Anas platyrhynchos]	4.02e-13
CL26784Contig1	22.5493	3.30168	41.7969	12.6593	3.66212	0.00346211	0.217087	Up
CL26812Contig1	18.6524	5.5028	31.802	5.77923	2.53088	0.0385861	0.827801	Up
CL26914Contig1	12.9127	2.20112	23.6243	10.7329	3.42396	0.026747	0.70668	Up
CL26917Contig1	10.5452	1.10056	19.9898	18.1633	4.18295	0.0241683	0.662986	Up
CL26931Contig1	19.9898	0	39.9796	Inf	Inf	0.00014469	0.0234254	Up
CL26966Contig1	11.5498	2.20112	20.8984	9.49445	3.24708	0.0430018	0.863938	Up
CL26991Contig1	19.561	5.5028	33.6192	6.10947	2.61105	0.0306538	0.751436	Up	gi|483511552|gb|EOB00356.1|hypothetical protein Anapl_08760 [Anas platyrhynchos]	1.15156e-09
CL27066Contig1	12.2665	0	24.5329	Inf	Inf	0.00269957	0.184181	Up
CL27171Contig1	12.7208	0	25.4416	Inf	Inf	0.00222793	0.160484	Up	gi|543369378|ref|XP_005527916.1|PREDICTED: uncharacterized protein LOC102109491, partial [Pseudopodoces humilis]	6.5716e-53	sp|P31792|POL_FENV1	1e-37	Pol polyprotein (Fragment) OS=Feline endogenous virus ECE1 GN=pol PE=3 SV=1	KOG0017	6e-29	FOG: Transposon-encoded proteins with TYA, reverse transcriptase, integrase domains in various combinations		GO:0019028;GO:0046718;GO:0090305;GO:0003723;GO:0006310;GO:0008270;GO:0006278;GO:0019068;GO:0003887;GO:0003964;GO:0004523;GO:0003677;GO:0006508;GO:0075713;GO:0004190;GO:0005198;GO:0015074	viral capsid|viral entry into host cell|nucleic acid phosphodiester bond hydrolysis|RNA binding|DNA recombination|zinc ion binding|RNA-dependent DNA replication|virion assembly|DNA-directed DNA polymerase activity|RNA-directed DNA polymerase activity|RNA-DNA hybrid ribonuclease activity|DNA binding|proteolysis|establishment of integrated proviral latency|aspartic-type endopeptidase activity|struc…
CL27186Contig1	9.9949	0	19.9898	Inf	Inf	0.0074025	0.353084	Up
CL2722Contig1	33.2159	11.0056	55.4263	5.03618	2.33233	0.0194457	0.604212	Up
CL2722Contig2	31.4947	12.1062	50.8831	4.20308	2.07145	0.0378804	0.821058	Up	gi|514713719|ref|XP_005012132.1|PREDICTED: histone H1oo-like [Anas platyrhynchos]	4.35569e-32	sp|Q8IZA3|H1FOO_HUMAN	1e-16	Histone H1oo OS=Homo sapiens GN=H1FOO PE=2 SV=1	KOG4012	3e-17	Histone H1		GO:0000786;GO:0001674;GO:0003677;GO:0006334	nucleosome|female germ cell nucleus|DNA binding|nucleosome assembly
CL27282Contig1	11.9081	1.10056	22.7157	20.6401	4.36738	0.0141131	0.496422	Up	gi|513216977|ref|XP_424040.4|PREDICTED: seizure protein 6 homolog, partial [Gallus gallus]	7.6173e-20	sp|A0JNA2|SEZ6_BOVIN	5e-11	Seizure protein 6 homolog OS=Bos taurus GN=SEZ6 PE=2 SV=1					GO:0005615;GO:0060079;GO:0043197;GO:0043198;GO:2000171;GO:1900006	extracellular space|regulation of excitatory postsynaptic membrane potential|dendritic spine|dendritic shaft|negative regulation of dendrite development|positive regulation of dendrite development
CL2728Contig1	77.7897	22.0112	133.568	6.06819	2.60127	0.00256644	0.179726	Up
CL27301Contig1	12.2665	0	24.5329	Inf	Inf	0.00269957	0.184181	Up
CL27346Contig1	13.463	3.30168	23.6243	7.15524	2.839	0.0483853	0.9183	Up
CL27356Contig1	17.5518	3.30168	31.802	9.63205	3.26784	0.0140636	0.496422	Up
CL27466Contig1	14.8259	3.30168	26.3502	7.98084	2.99654	0.0317853	0.760062	Up
CL2750Contig2	61.1016	28.6146	93.5886	3.27066	1.70958	0.0467286	0.899354	Up
CL27537Contig1	10.9995	1.10056	20.8984	18.9889	4.24708	0.0201577	0.617373	Up
CL27543Contig1	27.9306	7.70393	48.1573	6.251	2.64409	0.0134825	0.491925	Up
CL27587Contig1	8.63196	0	17.2639	Inf	Inf	0.0141475	0.496422	Up
CL27603Contig1	44.094	5.5028	82.6851	15.026	3.90939	0.000203972	0.0298552	Up
CL27606Contig1	18.6269	0	37.2537	Inf	Inf	0.000231987	0.0329036	Up
CL27616Contig1	17.5518	3.30168	31.802	9.63205	3.26784	0.0140636	0.496422	Up
CL27637Contig1	8.17765	0	16.3553	Inf	Inf	0.0176986	0.572712	Up
CL27652Contig1	15.1843	2.20112	28.1675	12.7969	3.67772	0.0124928	0.466288	Up
CL27656Contig1	20.1113	6.60337	33.6192	5.09123	2.34801	0.0455289	0.885449	Up
CL2784Contig1	160.487	63.8325	257.142	4.02838	2.0102	0.00712365	0.347688	Up	gi|395540420|ref|XP_003772153.1|PREDICTED: MAGUK p55 subfamily member 6 [Sarcophilus harrisii]	1.14605e-21	sp|Q9NZW5|MPP6_HUMAN	3e-23	MAGUK p55 subfamily member 6 OS=Homo sapiens GN=MPP6 PE=1 SV=2	KOG0609	8e-24	Calcium/calmodulin-dependent serine protein kinase/membrane-associated guanylate kinase		GO:0000176;GO:0046939;GO:0003723;GO:0016021;GO:0005730;GO:0006461;GO:0004385;GO:0030165;GO:0000460;GO:0005737;GO:0000087;GO:0005886	nuclear exosome (RNase complex)|nucleotide phosphorylation|RNA binding|integral component of membrane|nucleolus|protein complex assembly|guanylate kinase activity|PDZ domain binding|maturation of 5.8S rRNA|cytoplasm|mitotic M phase|plasma membrane
CL27856Contig1	19.9194	4.40224	35.4365	8.04964	3.00892	0.0150253	0.517823	Up
CL27875Contig1	7.72333	0	15.4467	Inf	Inf	0.0222382	0.642775	Up
CL2792Contig1	130.144	64.9331	195.355	3.00856	1.58907	0.0363436	0.804503	Up	gi|483513546|gb|EOB01599.1|hypothetical protein Anapl_13556 [Anas platyrhynchos]	2.34533e-08
CL28008Contig1	22.2869	5.5028	39.071	7.10019	2.82786	0.01562	0.531521	Up
CL28011Contig1	15.4467	0	30.8933	Inf	Inf	0.000748123	0.0771901	Up
CL2804Contig1	61.46	27.514	95.4059	3.46754	1.79391	0.0373385	0.813162	Up
CL28079Contig1	7.26902	0	14.538	Inf	Inf	0.0280724	0.71455	Up
CL28131Contig1	27746.6	16691.1	38802	2.32471	1.21705	0.0234253	0.65306	Up	gi|543340415|ref|XP_005516866.1|PREDICTED: protein NYNRIN-like [Pseudopodoces humilis]	0	sp|P10272|POL_BAEVM	0	Pol polyprotein OS=Baboon endogenous virus (strain M7) GN=pol PE=3 SV=1	KOG0017	2e-80	FOG: Transposon-encoded proteins with TYA, reverse transcriptase, integrase domains in various combinations		GO:0019028;GO:0046718;GO:0090305;GO:0003723;GO:0006310;GO:0008270;GO:0006278;GO:0019068;GO:0003887;GO:0003964;GO:0004523;GO:0003677;GO:0006508;GO:0075713;GO:0004190;GO:0005198;GO:0015074	viral capsid|viral entry into host cell|nucleic acid phosphodiester bond hydrolysis|RNA binding|DNA recombination|zinc ion binding|RNA-dependent DNA replication|virion assembly|DNA-directed DNA polymerase activity|RNA-directed DNA polymerase activity|RNA-DNA hybrid ribonuclease activity|DNA binding|proteolysis|establishment of integrated proviral latency|aspartic-type endopeptidase activity|struc…
CL28181Contig1	7.26902	0	14.538	Inf	Inf	0.0280724	0.71455	Up
CL28184Contig1	12.9127	2.20112	23.6243	10.7329	3.42396	0.026747	0.70668	Up
CL28204Contig1	6.81471	0	13.6294	Inf	Inf	0.0356133	0.798886	Up
CL28285Contig1	14.9924	0	29.9847	Inf	Inf	0.000891641	0.0870059	Up
CL28326Contig1	1759.09	604.208	2913.97	4.82279	2.26987	1.47776e-05	0.00385527	Up	gi|514732873|ref|XP_005016704.1|PREDICTED: c-X-C chemokine receptor type 6 [Anas platyrhynchos]	0	sp|Q9EQ16|CXCR6_MOUSE	6e-111	C-X-C chemokine receptor type 6 OS=Mus musculus GN=Cxcr6 PE=1 SV=1	KOG3656	8e-70	FOG: 7 transmembrane receptor	ko04060, Cytokine-cytokine receptor interaction;ko04062, Chemokine signaling pathway;	GO:0006935;GO:0006954;GO:0005886;GO:0070098;GO:0016494;GO:0007186;GO:0016021;GO:0015026;GO:0006955;GO:0016493	chemotaxis|inflammatory response|plasma membrane|chemokine-mediated signaling pathway|C-X-C chemokine receptor activity|G-protein coupled receptor signaling pathway|integral component of membrane|coreceptor activity|immune response|C-C chemokine receptor activity
CL28367Contig1	16.8096	0	33.6192	Inf	Inf	0.000447457	0.0530115	Up
CL28393Contig1	16.5472	2.20112	30.8933	14.0353	3.81098	0.00803807	0.373468	Up
CL28394Contig1	8.17765	0	16.3553	Inf	Inf	0.0176986	0.572712	Up
CL2844Contig2	21.1863	3.30168	39.071	11.8337	3.56482	0.00500985	0.279658	Up
CL28493Contig1	16.8096	0	33.6192	Inf	Inf	0.000447457	0.0530115	Up
CL2849Contig1	174.602	90.246	258.959	2.86948	1.52079	0.0358646	0.800701	Up
CL28515Contig1	8.17765	0	16.3553	Inf	Inf	0.0176986	0.572712	Up
CL28587Contig1	20.5656	6.60337	34.5278	5.22883	2.38649	0.0408982	0.848713	Up
CL28665Contig1	16.6432	3.30168	29.9847	9.08164	3.18295	0.0183887	0.587629	Up
CL28682Contig1	8.17765	0	16.3553	Inf	Inf	0.0176986	0.572712	Up
CL28695Contig1	10880.7	7355.05	14406.3	1.95869	0.969892	0.0481251	0.917165	Up	gi|514754426|ref|XP_005021601.1|PREDICTED: poly [ADP-ribose] polymerase 12-like [Anas platyrhynchos]	0	sp|Q8BZ20|PAR12_MOUSE	6e-129	Poly [ADP-ribose] polymerase 12 OS=Mus musculus GN=Parp12 PE=2 SV=3	KOG4177	1e-10	Ankyrin		GO:0046872;GO:0003950	metal ion binding|NAD+ ADP-ribosyltransferase activity
CL28704Contig1	7.26902	0	14.538	Inf	Inf	0.0280724	0.71455	Up
CL28720Contig1	5309.5	3474.47	7144.54	2.0563	1.04005	0.0303305	0.749716	Up	gi|514782275|ref|XP_005028049.1|PREDICTED: vacuolar protein sorting-associated protein 13C [Anas platyrhynchos]	0	sp|Q709C8|VP13C_HUMAN	0	Vacuolar protein sorting-associated protein 13C OS=Homo sapiens GN=VPS13C PE=1 SV=1	KOG1809	0	Vacuolar protein sorting-associated protein
CL28765Contig1	18.0061	3.30168	32.7106	9.90725	3.30848	0.0123169	0.463503	Up
CL28868Contig1	22.2614	0	44.5228	Inf	Inf	6.83955e-05	0.0130446	Up	gi|483518665|gb|EOB04747.1|Forkhead-associated domain-containing protein 1, partial [Anas platyrhynchos]	7.9547e-06
CL28924Contig1	12.4584	2.20112	22.7157	10.3201	3.36738	0.0312875	0.758477	Up
CL28957Contig1	11.3578	0	22.7157	Inf	Inf	0.00400164	0.238728	Up
CL2896Contig1	60.8842	20.9107	100.858	4.82327	2.27001	0.0100671	0.419507	Up
CL28978Contig1	20.0153	5.5028	34.5278	6.27459	2.64952	0.0273481	0.713473	Up
CL28984Contig1	23.8163	2.20112	45.4314	20.6401	4.36738	0.000927478	0.0894625	Up
CL28996Contig1	16.2848	4.40224	28.1675	6.39843	2.67772	0.0404339	0.846811	Up
CL2899Contig1	38.143	15.4079	60.878	3.95111	1.98226	0.0363418	0.804503	Up
CL29036Contig1	9.54059	0	19.0812	Inf	Inf	0.00915128	0.397564	Up	gi|530650960|ref|XP_005311893.1|PREDICTED: protein NYNRIN-like [Chrysemys picta bellii]	7.56196e-33	sp|O92815|POL_WDSV	4e-16	Gag-Pol polyprotein OS=Walleye dermal sarcoma virus GN=gag-pol PE=1 SV=2	KOG0017	6e-14	FOG: Transposon-encoded proteins with TYA, reverse transcriptase, integrase domains in various combinations		GO:0019013;GO:0090305;GO:0039660;GO:0003723;GO:0006310;GO:0008270;GO:0006278;GO:0003887;GO:0003964;GO:0004523;GO:0003677;GO:0006508;GO:0004190;GO:0020002;GO:0015074;GO:0016020	viral nucleocapsid|nucleic acid phosphodiester bond hydrolysis|structural constituent of virion|RNA binding|DNA recombination|zinc ion binding|RNA-dependent DNA replication|DNA-directed DNA polymerase activity|RNA-directed DNA polymerase activity|RNA-DNA hybrid ribonuclease activity|DNA binding|proteolysis|aspartic-type endopeptidase activity|host cell plasma membrane|DNA integration|membrane
CL29109Contig1	24.0786	0	48.1573	Inf	Inf	3.87896e-05	0.00849172	Up
CL2915Contig1	62.8229	27.514	98.1318	3.56661	1.83455	0.032916	0.773381	Up
CL29188Contig1	17.1935	4.40224	29.9847	6.81123	2.76792	0.0314284	0.759334	Up
CL29289Contig1	6.81471	0	13.6294	Inf	Inf	0.0356133	0.798886	Up
CL29308Contig1	8.63196	0	17.2639	Inf	Inf	0.0141475	0.496422	Up
CL29324Contig1	170.776	88.0449	253.507	2.87929	1.52572	0.0359361	0.801693	Up	gi|483518980|gb|EOB04933.1|hypothetical protein Anapl_06854 [Anas platyrhynchos]	1.56631e-13
CL29347Contig1	7.26902	0	14.538	Inf	Inf	0.0280724	0.71455	Up
CL29395Contig1	17.2639	0	34.5278	Inf	Inf	0.000378551	0.0471793	Up
CL29434Contig1	12.2665	0	24.5329	Inf	Inf	0.00269957	0.184181	Up
CL29449Contig1	13.9173	3.30168	24.5329	7.43044	2.89345	0.0420163	0.854721	Up
CL29478Contig1	63.2517	22.0112	104.492	4.74722	2.24708	0.0102806	0.422517	Up	gi|564264387|ref|XP_006271042.1|PREDICTED: transcriptional-regulating factor 1-like [Alligator mississippiensis]	4.88106e-29	sp|Q9H0D2|ZN541_HUMAN	2e-12	Zinc finger protein 541 OS=Homo sapiens GN=ZNF541 PE=2 SV=2	KOG4167	5e-13	Predicted DNA-binding protein, contains SANT and ELM2 domains
CL29483Contig1	8.17765	0	16.3553	Inf	Inf	0.0176986	0.572712	Up
CL29497Contig1	13.1751	0	26.3502	Inf	Inf	0.00184436	0.142213	Up
CL29503Contig1	10.5452	1.10056	19.9898	18.1633	4.18295	0.0241683	0.662986	Up
CL29608Contig1	18.1726	0	36.3451	Inf	Inf	0.000272578	0.0366967	Up
CL29693Contig1	12.4584	2.20112	22.7157	10.3201	3.36738	0.0312875	0.758477	Up
CL29698Contig1	13.8213	2.20112	25.4416	11.5585	3.53088	0.0196365	0.604351	Up
CL29700Contig1	8.17765	0	16.3553	Inf	Inf	0.0176986	0.572712	Up	gi|530650960|ref|XP_005311893.1|PREDICTED: protein NYNRIN-like [Chrysemys picta bellii]	1.17187e-20
CL29722Contig1	15.6386	2.20112	29.0761	13.2097	3.72352	0.0107721	0.432868	Up
CL29761Contig1	170.368	0	340.735	Inf	Inf	3.17953e-13	8.42593e-10	Up
CL29777Contig1	248.95	114.458	383.441	3.35005	1.74418	0.0111521	0.443242	Up	gi|46048807|ref|NP_990365.1|voltage-dependent L-type calcium channel subunit alpha-1D [Gallus gallus] >gi|6165983|sp|O73700.1|CAC1D_CHICK RecName: Full=Voltage-dependent L-type calcium channel subunit alpha-1D; AltName: Full=CHCACHA1D; AltName: Full=Voltage-gated calcium channel subunit alpha Cav1.3 >gi|2992545|gb|AAC08304.1| L-type voltage-gated calcium channel alpha1D subunit ChCaChA1D [Gallus …	0	sp|O73700|CAC1D_CHICK	0	Voltage-dependent L-type calcium channel subunit alpha-1D OS=Gallus gallus GN=CACNA1D PE=2 SV=1	KOG2301	0	Voltage-gated Ca2+ channels, alpha1 subunits	ko04010, MAPK signaling pathway;ko04020, Calcium signaling pathway;ko04022, cGMP - PKG signaling pathway;ko04024, cAMP signaling pathway;ko05410, Hypertrophic cardiomyopathy (HCM);ko05412, Arrhythmogenic right ventricular cardiomyopathy (ARVC);ko05414, Dilated cardiomyopathy (DCM);ko04930, Type II diabetes mellitus;ko05010, Alzheimer's disease;ko05031, Amphetamine addiction;ko04260, Cardiac muscl…	GO:0086091;GO:0030506;GO:0007605;GO:0051393;GO:0086059;GO:0008331;GO:0086052;GO:0086046;GO:1901016;GO:0046872;GO:0051928;GO:0060372;GO:0030018;GO:0007188;GO:0070509;GO:0005891	regulation of heart rate by cardiac conduction|ankyrin binding|sensory perception of sound|alpha-actinin binding|voltage-gated calcium channel activity involved SA node cell action potential|high voltage-gated calcium channel activity|membrane repolarization during SA node cell action potential|membrane depolarization during SA node cell action potential|regulation of potassium ion transmembrane …
CL29789Contig1	51.2476	19.8101	82.6851	4.17389	2.06139	0.0216968	0.641504	Up
CL29810Contig1	103.525	46.2236	160.827	3.47933	1.79881	0.0230618	0.649818	Up	gi|449473803|ref|XP_002191339.2|PREDICTED: transmembrane protein 110 [Taeniopygia guttata]	1.00275e-29	sp|Q76MS9|MSTN1_CHICK	1e-32	Musculoskeletal embryonic nuclear protein 1 OS=Gallus gallus GN=MUSTN1 PE=3 SV=1					GO:0005634	nucleus
CL29825Contig1	26.2093	8.80449	43.6141	4.95362	2.30848	0.0306424	0.751436	Up	gi|483524167|gb|EOB08241.1|Ly6/PLAUR domain-containing protein LOC130576, partial [Anas platyrhynchos]	6.01241e-100	sp|Q8NI32|LPD6B_HUMAN	1e-91	Ly6/PLAUR domain-containing protein 6B OS=Homo sapiens GN=LYPD6B PE=2 SV=1					GO:0031225;GO:0005886	anchored component of membrane|plasma membrane
CL2985Contig1	44.6953	17.609	71.7816	4.07642	2.0273	0.0273409	0.713473	Up
CL29869Contig1	29.1976	6.60337	51.7918	7.84324	2.97145	0.00601728	0.315164	Up
CL29870Contig1	39.6019	16.5084	62.6953	3.79778	1.92516	0.0398792	0.841557	Up
CL29879Contig1	67.0781	24.2123	109.944	4.54082	2.18295	0.0115789	0.448468	Up
CL29902Contig1	65.2609	24.2123	106.309	4.39071	2.13446	0.0137534	0.496422	Up
CL29919Contig1	33.3119	12.1062	54.5177	4.50329	2.17098	0.0280135	0.71455	Up
CL29945Contig1	14.8259	3.30168	26.3502	7.98084	2.99654	0.0317853	0.760062	Up
CL29963Contig1	1281.91	748.381	1815.44	2.42582	1.27847	0.0150158	0.517823	Up	gi|527248818|ref|XP_005142725.1|PREDICTED: dual specificity protein phosphatase 1 [Melopsittacus undulatus]	3.5074e-116	sp|P28562|DUS1_HUMAN	8e-107	Dual specificity protein phosphatase 1 OS=Homo sapiens GN=DUSP1 PE=1 SV=3	KOG1716	2e-107	Dual specificity phosphatase	ko04010, MAPK signaling pathway;	GO:0004725;GO:0017017;GO:0035335	protein tyrosine phosphatase activity|MAP kinase tyrosine/serine/threonine phosphatase activity|peptidyl-tyrosine dephosphorylation
CL29993Contig1	82.3135	37.4191	127.208	3.39955	1.76534	0.0315214	0.760062	Up
CL30077Contig1	38.0215	8.80449	67.2384	7.63684	2.93298	0.00351399	0.218976	Up
CL30122Contig1	26.2798	4.40224	48.1573	10.9393	3.45144	0.0030361	0.197895	Up
CL30135Contig1	40.1521	17.609	62.6953	3.56042	1.83205	0.0489052	0.922257	Up
CL30187Contig1	91.7714	0	183.543	Inf	Inf	4.93681e-10	5.40376e-07	Up
CL30190Contig1	9.9949	0	19.9898	Inf	Inf	0.0074025	0.353084	Up
CL30337Contig1	42.4942	13.2067	71.7816	5.43523	2.44234	0.010073	0.419507	Up
CL30345Contig1	8.63196	0	17.2639	Inf	Inf	0.0141475	0.496422	Up
CL30355Contig1	499.952	299.353	700.552	2.34022	1.22665	0.0409698	0.848713	Up	gi|514703433|ref|XP_005008863.1|PREDICTED: uncharacterized protein LOC101791564 [Anas platyrhynchos]	8.50986e-47								GO:0005543	phospholipid binding
CL30363Contig1	20.0858	1.10056	39.071	35.501	5.14979	0.000808366	0.0818224	Up	gi|514705425|ref|XP_005009823.1|PREDICTED: fibrous sheath-interacting protein 1 [Anas platyrhynchos]	1.64091e-118	sp|Q8NA03|FSIP1_HUMAN	1e-30	Fibrous sheath-interacting protein 1 OS=Homo sapiens GN=FSIP1 PE=2 SV=1
CL30365Contig1	136.076	70.4359	201.715	2.86381	1.51794	0.0436928	0.870587	Up
CL3043Contig1	75.3068	35.2179	115.396	3.27662	1.71221	0.039511	0.838822	Up
CL30455Contig1	33.4528	3.30168	63.6039	19.2641	4.26784	0.000256218	0.0352305	Up	gi|525027649|ref|XP_005061250.1|PREDICTED: retinal dehydrogenase 1 isoform X1 [Ficedula albicollis] >gi|525027651|ref|XP_005061251.1| PREDICTED: retinal dehydrogenase 1 isoform X2 [Ficedula albicollis] >gi|525027653|ref|XP_005061252.1| PREDICTED: retinal dehydrogenase 1 isoform X3 [Ficedula albicollis]	1.70554e-154	sp|P27463|AL1A1_CHICK	0	Retinal dehydrogenase 1 OS=Gallus gallus GN=ALDH1A1 PE=2 SV=1	KOG2450	9e-175	Aldehyde dehydrogenase		GO:0005737;GO:0004029;GO:0042572;GO:0055114;GO:0001758	cytoplasm|aldehyde dehydrogenase (NAD) activity|retinol metabolic process|oxidation-reduction process|retinal dehydrogenase activity
CL30465Contig1	43.3323	17.609	69.0557	3.92162	1.97145	0.0324534	0.766445	Up
CL30484Contig1	48.0674	19.8101	76.3247	3.85282	1.94591	0.0311875	0.758477	Up	gi|483521892|gb|EOB06805.1|Speedy protein A, partial [Anas platyrhynchos]	1.0108e-26	sp|Q5IBH7|SPDYA_MOUSE	2e-29	Speedy protein A OS=Mus musculus GN=Spdya PE=1 SV=2				ko04114, Oocyte meiosis;ko04914, Progesterone-mediated oocyte maturation;	GO:0045737;GO:0019901;GO:0000082;GO:0008284;GO:0006974;GO:0007140;GO:0005634	positive regulation of cyclin-dependent protein kinase activity|protein kinase binding|G1/S transition of mitotic cell cycle|positive regulation of cell proliferation|cellular response to DNA damage stimulus|male meiosis|nucleus
CL30490Contig1	21.2823	4.40224	38.1624	8.66884	3.11584	0.0105059	0.42798	Up	gi|514749331|ref|XP_005020371.1|PREDICTED: retinal dehydrogenase 1 [Anas platyrhynchos]	3.5904e-121	sp|P27463|AL1A1_CHICK	6e-149	Retinal dehydrogenase 1 OS=Gallus gallus GN=ALDH1A1 PE=2 SV=1	KOG2450	1e-126	Aldehyde dehydrogenase		GO:0005737;GO:0004029;GO:0042572;GO:0055114;GO:0001758	cytoplasm|aldehyde dehydrogenase (NAD) activity|retinol metabolic process|oxidation-reduction process|retinal dehydrogenase activity
CL304Contig1	72.1205	14.3073	129.934	9.08164	3.18295	0.000446112	0.0530115	Up
CL3050Contig1	46.583	13.2067	79.9592	6.05443	2.59799	0.00577648	0.310407	Up
CL30522Contig1	12.0041	2.20112	21.8071	9.90725	3.30848	0.0366533	0.804503	Up
CL30650Contig1	38.6932	16.5084	60.878	3.6877	1.88272	0.0451264	0.885449	Up
CL30655Contig1	99.6284	48.4247	150.832	3.11478	1.63913	0.0384476	0.827488	Up
CL30684Contig1	313.404	160.682	466.126	2.90092	1.53651	0.0190152	0.599895	Up	gi|514756934|ref|XP_005022193.1|PREDICTED: SH2 domain-containing protein 1A isoform X1 [Anas platyrhynchos] >gi|514756938|ref|XP_005022194.1| PREDICTED: SH2 domain-containing protein 1A isoform X2 [Anas platyrhynchos]	1.9371e-68	sp|B2RZ59|SH21A_RAT	7e-59	SH2 domain-containing protein 1A OS=Rattus norvegicus GN=Sh2d1a PE=1 SV=1	KOG0565	1e-56	Inositol polyphosphate 5-phosphatase and related proteins	ko05162, Measles;ko04650, Natural killer cell mediated cytotoxicity;	GO:0005737;GO:0006959;GO:0005070;GO:0045954;GO:0007267;GO:0006968	cytoplasm|humoral immune response|SH3/SH2 adaptor activity|positive regulation of natural killer cell mediated cytotoxicity|cell-cell signaling|cellular defense response
CL30687Contig1	27.2588	0	54.5177	Inf	Inf	1.53413e-05	0.00392107	Up
CL30709Contig1	184.227	49.5252	318.928	6.43971	2.687	0.000363501	0.0462188	Up
CL30750Contig1	135.398	41.8213	228.974	5.47506	2.45287	0.00170785	0.136744	Up
CL30781Contig1	31.949	12.1062	51.7918	4.27813	2.09698	0.0351049	0.798886	Up
CL30788Contig1	33.8367	7.70393	59.9694	7.78427	2.96056	0.00429143	0.252133	Up
CL3085Contig1	78.0521	19.8101	136.294	6.88003	2.78242	0.00140693	0.120068	Up
CL30867Contig1	239.083	63.8325	414.334	6.49096	2.69843	0.000180139	0.027653	Up
CL30916Contig1	7961.78	2864.76	13058.8	4.55843	2.18854	1.21395e-05	0.00332194	Up	gi|363734039|ref|XP_001233950.2|PREDICTED: dispanin subfamily A member 2b-like isoformX1 [Gallus gallus]	2.81308e-36	sp|Q91499|DSA2B_TORMA	7e-18	Dispanin subfamily A member 2b OS=Torpedo marmorata PE=2 SV=1					GO:0009607;GO:0016021	response to biotic stimulus|integral component of membrane
CL30942Contig1	34.5278	0	69.0557	Inf	Inf	2.43517e-06	0.000839817	Up
CL30967Contig1	287.31	137.57	437.05	3.17692	1.66763	0.0125643	0.467916	Up	gi|483520025|gb|EOB05640.1|Rho-related GTP-binding protein RhoC, partial [Anas platyrhynchos]	1.48304e-106	sp|Q9PSX7|RHOC_CHICK	2e-138	Rho-related GTP-binding protein RhoC OS=Gallus gallus GN=RHOC PE=1 SV=1	KOG0393	6e-135	Ras-related small GTPase, Rho type		GO:0000910;GO:0004871;GO:0007264;GO:0043123;GO:0043297;GO:0032154;GO:0005634;GO:0005525;GO:0005886	cytokinesis|signal transducer activity|small GTPase mediated signal transduction|positive regulation of I-kappaB kinase/NF-kappaB signaling|apical junction assembly|cleavage furrow|nucleus|GTP binding|plasma membrane
CL3098Contig1	48.4258	18.7095	78.142	4.17659	2.06232	0.0229621	0.64958	Up
CL30990Contig1	27.1179	8.80449	45.4314	5.16003	2.36738	0.0255676	0.690272	Up
CL31033Contig1	1567.96	928.873	2207.06	2.37606	1.24857	0.0150566	0.51788	Up	gi|326920020|ref|XP_003206274.1|PREDICTED: signal peptide, CUB and EGF-like domain-containing protein 2-like [Meleagris gallopavo]	0	sp|Q9NQ36|SCUB2_HUMAN	0	Signal peptide, CUB and EGF-like domain-containing protein 2 OS=Homo sapiens GN=SCUBE2 PE=2 SV=2	KOG1217	0	Fibrillins and related proteins containing Ca2+-binding EGF-like domains		GO:0005509;GO:0005576	calcium ion binding|extracellular region
CL31111Contig1	4707.01	2655.65	6758.37	2.5449	1.34761	0.0053101	0.289988	Up	gi|483507682|gb|EOA98124.1|Syndecan-4, partial [Anas platyrhynchos]	1.51504e-55	sp|P49416|SDC4_CHICK	8e-61	Syndecan-4 OS=Gallus gallus GN=SDC4 PE=1 SV=1				ko04512, ECM-receptor interaction;ko04514, Cell adhesion molecules (CAMs);ko05205, Proteoglycans in cancer;	GO:0070053;GO:0016021;GO:0009986;GO:0008092	thrombospondin receptor activity|integral component of membrane|cell surface|cytoskeletal protein binding
CL31133Contig1	622.424	375.291	869.557	2.31702	1.21227	0.0365348	0.804503	Up
CL31155Contig1	56.1746	24.2123	88.1369	3.64016	1.864	0.0334585	0.78175	Up
CL31186Contig1	769.933	50.6258	1489.24	29.4166	4.87856	1.97151e-13	5.51485e-10	Up	gi|513229977|ref|XP_424930.4|PREDICTED: excitatory amino acid transporter 3 [Gallus gallus]	0	sp|P31597|EAA3_RABIT	0	Excitatory amino acid transporter 3 OS=Oryctolagus cuniculus GN=SLC1A1 PE=2 SV=1	KOG3787	0	Glutamate/aspartate and neutral amino acid transporters	ko04974, Protein digestion and absorption;ko04724, Glutamatergic synapse;	GO:0016021;GO:0051260;GO:0051938;GO:0070779;GO:0015501;GO:0017153;GO:0005886	integral component of membrane|protein homooligomerization|L-glutamate import|D-aspartate import|glutamate:sodium symporter activity|sodium:dicarboxylate symporter activity|plasma membrane
CL31255Contig1	539.71	114.458	964.962	8.43069	3.07565	1.31621e-06	0.000472437	Up
CL31270Contig1	21.8326	5.5028	38.1624	6.93507	2.79391	0.0174461	0.570777	Up	gi|514763303|ref|XP_005023703.1|PREDICTED: protein FAM194A isoform X4 [Anas platyrhynchos]	5.63538e-176	sp|Q7L0X2|F194A_HUMAN	2e-82	Protein FAM194A OS=Homo sapiens GN=FAM194A PE=2 SV=1
CL31295Contig1	12944.4	5497.3	20391.4	3.70935	1.89117	0.00019461	0.0290402	Up	gi|514732106|ref|XP_005016520.1|PREDICTED: sestrin-1 isoform X2 [Anas platyrhynchos]	0	sp|Q4R6P7|SESN1_MACFA	0	Sestrin-1 OS=Macaca fascicularis GN=SESN1 PE=2 SV=1	KOG3746	0	Uncharacterized conserved protein	ko04115, p53 signaling pathway;	GO:0005634;GO:0007050	nucleus|cell cycle arrest
CL31360Contig1	40.5299	1.10056	79.9592	72.6532	6.18295	5.07779e-06	0.00162848	Up
CL31362Contig1	29.6264	1.10056	58.1522	52.8387	5.72352	5.45048e-05	0.0110648	Up	gi|514760887|ref|XP_005023124.1|PREDICTED: heterogeneous nuclear ribonucleoprotein K-like [Anas platyrhynchos]	3.31171e-47
CL31373Contig1	188.475	103.453	273.497	2.64369	1.40255	0.0493304	0.925424	Up	gi|483516223|gb|EOB03174.1|hypothetical protein Anapl_08491 [Anas platyrhynchos]	6.70004e-22
CL31498Contig1	78.1991	31.9163	124.482	3.90027	1.96357	0.0186601	0.591288	Up
CL31572Contig1	67.6284	25.3129	109.944	4.3434	2.11882	0.0138392	0.496422	Up
CL31623Contig1	42.974	18.7095	67.2384	3.59381	1.84551	0.0444067	0.880285	Up
CL31695Contig1	223.49	51.7264	395.253	7.64123	2.9338	7.04024e-05	0.0133767	Up	gi|514774666|ref|XP_005026408.1|PREDICTED: retinoid-binding protein 7 [Anas platyrhynchos] >gi|483504335|gb|EOA96499.1| Retinoid-binding protein 7 [Anas platyrhynchos]	6.76455e-74	sp|Q9EPC5|RET7_MOUSE	7e-76	Retinoid-binding protein 7 OS=Mus musculus GN=Rbp7 PE=2 SV=1	KOG4015	3e-76	Fatty acid-binding protein FABP	ko00760, Nicotinate and nicotinamide metabolism;	GO:0005501;GO:0006810;GO:0009435;GO:0004515;GO:0000309;GO:0005215;GO:0005634	retinoid binding|transport|NAD biosynthetic process|nicotinate-nucleotide adenylyltransferase activity|nicotinamide-nucleotide adenylyltransferase activity|transporter activity|nucleus
CL31777Contig1	44.241	17.609	70.873	4.02482	2.00892	0.0289404	0.724244	Up	gi|465971844|gb|EMP32857.1|Homeobox protein MSX-1 [Chelonia mydas]	1.42973e-30	sp|P28361|MSX1_CHICK	3e-39	Homeobox protein MSX-1 OS=Gallus gallus GN=MSX1 PE=2 SV=1	KOG0492	9e-35	Transcription factor MSH, contains HOX domain	ko05166, HTLV-I infection;	GO:0002039;GO:0042475;GO:0030308;GO:0060325;GO:0030262;GO:0000902;GO:0030509;GO:0050821;GO:0034504;GO:0043565;GO:0035880;GO:0003700;GO:0005634	p53 binding|odontogenesis of dentin-containing tooth|negative regulation of cell growth|face morphogenesis|apoptotic nuclear changes|cell morphogenesis|BMP signaling pathway|protein stabilization|protein localization to nucleus|sequence-specific DNA binding|embryonic nail plate morphogenesis|sequence-specific DNA binding transcription factor activity|nucleus
CL31782Contig1	19.2731	2.20112	36.3451	16.5121	4.04545	0.00344133	0.216053	Up
CL3178Contig1	484.707	88.0449	881.369	10.0104	3.32343	3.94575e-07	0.000178984	Up	gi|514714123|ref|XP_005012233.1|PREDICTED: apolipoprotein L domain-containing protein 1 [Anas platyrhynchos]	6.87991e-105	sp|Q96LR9|APLD1_HUMAN	2e-62	Apolipoprotein L domain-containing protein 1 OS=Homo sapiens GN=APOLD1 PE=2 SV=2					GO:0006869;GO:0005576;GO:0042157;GO:0008289	lipid transport|extracellular region|lipoprotein metabolic process|lipid binding
CL31859Contig1	1206.58	728.571	1684.6	2.31219	1.20926	0.0221808	0.642775	Up	gi|514747731|ref|XP_005019986.1|PREDICTED: protein NLRC5 [Anas platyrhynchos]	0	sp|Q86WI3|NLRC5_HUMAN	3e-178	Protein NLRC5 OS=Homo sapiens GN=NLRC5 PE=1 SV=3	KOG4308	4e-115	LRR-containing protein		GO:0005829;GO:0045345;GO:0060335;GO:0000979;GO:0045944;GO:0043549;GO:0032088;GO:0045087;GO:0060339;GO:0060340;GO:0051607;GO:0005634	cytosol|positive regulation of MHC class I biosynthetic process|positive regulation of interferon-gamma-mediated signaling pathway|RNA polymerase II core promoter sequence-specific DNA binding|positive regulation of transcription from RNA polymerase II promoter|regulation of kinase activity|negative regulation of NF-kappaB transcription factor activity|innate immune response|negative regulation o…
CL31867Contig1	44.0684	0	88.1369	Inf	Inf	3.55326e-07	0.000164138	Up
CL3189Contig1	65.6447	28.6146	102.675	3.5882	1.84326	0.0309779	0.756802	Up
CL31925Contig1	156.353	73.7376	238.969	3.2408	1.69635	0.0221181	0.642775	Up	gi|514792220|ref|XP_005030401.1|PREDICTED: keratin, type I cytoskeletal 12 [Anas platyrhynchos]	1.75274e-118	sp|Q28706|K1C12_RABIT	8e-107	Keratin, type I cytoskeletal 12 (Fragment) OS=Oryctolagus cuniculus GN=KRT12 PE=2 SV=1					GO:0005882;GO:0060429;GO:0005198;GO:0061303	intermediate filament|epithelium development|structural molecule activity|cornea development in camera-type eye
CL31928Contig1	6152.36	3183.92	9120.8	2.86464	1.51836	0.00179885	0.141081	Up	gi|483500166|gb|EOA94662.1|Transmembrane protein 131, partial [Anas platyrhynchos]	1.54868e-111	sp|Q92545|TM131_HUMAN	8e-83	Transmembrane protein 131 OS=Homo sapiens GN=TMEM131 PE=1 SV=3	KOG3620	2e-83	Uncharacterized conserved protein
CL31933Contig1	43.1853	5.5028	80.8679	14.6958	3.87733	0.00023589	0.0330419	Up
CL31937Contig1	56.1746	24.2123	88.1369	3.64016	1.864	0.0334585	0.78175	Up
CL31949Contig1	59.1118	11.0056	107.218	9.74213	3.28424	0.000511303	0.0589122	Up
CL31997Contig1	71.0005	27.514	114.487	4.16104	2.05695	0.0157237	0.531521	Up	gi|513180707|ref|XP_001234326.2|PREDICTED: XK-related protein 2 isoform X1 [Gallus gallus]	4.47855e-16
CL3200Contig1	103.404	39.6202	167.187	4.21975	2.07716	0.00948846	0.403849	Up
CL32033Contig1	26.2798	4.40224	48.1573	10.9393	3.45144	0.0030361	0.197895	Up
CL32055Contig1	32.2114	9.90505	54.5177	5.50403	2.46049	0.0152724	0.522405	Up
CL32068Contig1	40.4339	0	80.8679	Inf	Inf	7.01013e-07	0.000286965	Up
CL3209Contig1	78.097	9.90505	146.289	14.7691	3.88451	3.62587e-05	0.00804257	Up	gi|483519714|gb|EOB05407.1|hypothetical protein Anapl_04616 [Anas platyrhynchos]	9.94632e-08
CL32114Contig1	715.681	303.755	1127.61	3.71223	1.89228	0.00108007	0.0994196	Up
CL32116Contig1	141.092	55.028	227.157	4.12802	2.04545	0.00733388	0.353084	Up
CL3212Contig1	55.17	23.1118	87.2282	3.77419	1.91617	0.0296464	0.734971	Up
CL32172Contig1	12.9127	2.20112	23.6243	10.7329	3.42396	0.026747	0.70668	Up
CL32270Contig1	13.6294	0	27.2588	Inf	Inf	0.0015314	0.125993	Up	gi|524992234|ref|XP_005043972.1|PREDICTED: uncharacterized protein LOC101817921, partial [Ficedula albicollis]	1.68307e-21	sp|Q9QC07|POK7_HUMAN	4e-19	HERV-K_1q23.3 provirus ancestral Pol protein OS=Homo sapiens PE=3 SV=2					GO:0003723;GO:0006310;GO:0008270;GO:0006278;GO:0005730;GO:0003964;GO:0004523;GO:0003677;GO:0005737;GO:0015074;GO:0051028	RNA binding|DNA recombination|zinc ion binding|RNA-dependent DNA replication|nucleolus|RNA-directed DNA polymerase activity|RNA-DNA hybrid ribonuclease activity|DNA binding|cytoplasm|DNA integration|mRNA transport
CL32274Contig1	249.873	0	499.745	Inf	Inf	7.81222e-16	3.57594e-12	Up
CL32298Contig1	232.837	127.665	338.009	2.64763	1.4047	0.0412655	0.850147	Up
CL32481Contig1	303.652	173.889	433.415	2.49249	1.31759	0.0442575	0.878852	Up	gi|483509992|gb|EOA99428.1|GRB2-associated-binding protein 3, partial [Anas platyrhynchos]	5.07435e-68	sp|Q8WWW8|GAB3_HUMAN	6e-27	GRB2-associated-binding protein 3 OS=Homo sapiens GN=GAB3 PE=2 SV=1					GO:0005543	phospholipid binding
CL32490Contig1	26.2093	8.80449	43.6141	4.95362	2.30848	0.0306424	0.751436	Up
CL32505Contig1	26.9964	2.20112	51.7918	23.5297	4.55641	0.000399678	0.0493239	Up
CL32521Contig1	32.4033	12.1062	52.7004	4.35319	2.12207	0.0325467	0.767929	Up
CL32618Contig1	39.5059	15.4079	63.6039	4.12802	2.04545	0.0300255	0.743636	Up
CL32645Contig1	17.6478	4.40224	30.8933	7.01763	2.81098	0.0277375	0.71455	Up
CL32647Contig1	31.6611	8.80449	54.5177	6.19203	2.63041	0.010702	0.432868	Up	gi|50756579|ref|XP_415223.1|PREDICTED: pre-B lymphocyte protein 3 [Gallus gallus]	1.00896e-48	sp|Q9UKI3|VPRE3_HUMAN	3e-37	Pre-B lymphocyte protein 3 OS=Homo sapiens GN=VPREB3 PE=2 SV=1
CL32728Contig1	69.657	12.1062	127.208	10.5077	3.39337	0.000246529	0.0341016	Up	gi|541963919|ref|XP_005437156.1|PREDICTED: uncharacterized protein LOC102054785 [Falco cherrug]	9.82425e-07
CL32730Contig1	34.6749	12.1062	57.2435	4.72846	2.24137	0.0224468	0.644538	Up
CL32734Contig1	707.7	405.006	1010.39	2.49476	1.3189	0.0206947	0.629607	Up	gi|541993022|ref|XP_005446836.1|PREDICTED: LOW QUALITY PROTEIN: MICAL-like protein 1 [Falco cherrug]	1.38632e-136	sp|E1BBG2|MILK1_BOVIN	5e-96	MICAL-like protein 1 OS=Bos taurus GN=MICALL1 PE=1 SV=2	KOG0035	4e-14	Ca2+-binding actin-bundling protein (actinin), alpha chain (EF-Hand protein superfamily)		GO:0008270	zinc ion binding
CL32738Contig1	54.3768	8.80449	99.949	11.3521	3.50488	0.000327816	0.0422145	Up	gi|514791489|ref|XP_005030229.1|PREDICTED: interferon-induced transmembrane protein 5-like isoform X1 [Anas platyrhynchos]	1.37485e-45	sp|Q91499|DSA2B_TORMA	2e-13	Dispanin subfamily A member 2b OS=Torpedo marmorata PE=2 SV=1					GO:0009607;GO:0016021	response to biotic stimulus|integral component of membrane
CL32757Contig1	25.8959	0	51.7918	Inf	Inf	2.26076e-05	0.00526999	Up
CL32825Contig1	183.446	77.0393	289.852	3.7624	1.91165	0.00869829	0.388686	Up
CL32858Contig1	31.0403	12.1062	49.9745	4.12802	2.04545	0.0408928	0.848713	Up
CL32881Contig1	16.8096	0	33.6192	Inf	Inf	0.000447457	0.0530115	Up
CL32887Contig1	24.9873	0	49.9745	Inf	Inf	2.95147e-05	0.0066641	Up
CL32912Contig1	331.173	171.688	490.659	2.85786	1.51494	0.0194572	0.604212	Up	gi|514728571|ref|XP_005015672.1|PREDICTED: platelet glycoprotein Ib alpha chain-like [Anas platyrhynchos]	2.80636e-120	sp|Q28256|GP1BA_CANFA	2e-33	Platelet glycoprotein Ib alpha chain OS=Canis familiaris GN=GP1BA PE=2 SV=2	KOG0619	1e-31	FOG: Leucine rich repeat	ko04512, ECM-receptor interaction;ko04611, Platelet activation;ko04640, Hematopoietic cell lineage;
CL32922Contig1	19.0812	0	38.1624	Inf	Inf	0.000197827	0.0290402	Up
CL3293Contig1	83.6764	37.4191	129.934	3.47239	1.79593	0.0284239	0.717019	Up	gi|513213779|ref|XP_003642391.2|PREDICTED: voltage-dependent calcium channel gamma-5 subunit-like isoform X1 [Gallus gallus] >gi|513213814|ref|XP_415681.3| PREDICTED: voltage-dependent calcium channel gamma-5 subunit isoform X3 [Gallus gallus]	5.15349e-143	sp|Q9UF02|CCG5_HUMAN	4e-166	Voltage-dependent calcium channel gamma-5 subunit OS=Homo sapiens GN=CACNG5 PE=2 SV=2				ko04010, MAPK signaling pathway;ko05410, Hypertrophic cardiomyopathy (HCM);ko05412, Arrhythmogenic right ventricular cardiomyopathy (ARVC);ko05414, Dilated cardiomyopathy (DCM);ko04260, Cardiac muscle contraction;ko04261, Adrenergic signaling in cardiomyocytes;ko04921, Oxytocin signaling pathway;	GO:0030054;GO:0005245;GO:0032281;GO:0006816;GO:0045211;GO:0014069;GO:2000311	cell junction|voltage-gated calcium channel activity|alpha-amino-3-hydroxy-5-methyl-4-isoxazolepropionic acid selective glutamate receptor complex|calcium ion transport|postsynaptic membrane|postsynaptic density|regulation of alpha-amino-3-hydroxy-5-methyl-4-isoxazole propionate selective glutamate receptor activity
CL3294Contig1	81.4048	37.4191	125.391	3.35098	1.74458	0.0337765	0.78626	Up
CL32952Contig1	7.72333	0	15.4467	Inf	Inf	0.0222382	0.642775	Up						KOG4676	8e-06	Splicing factor, arginine/serine-rich
CL33004Contig1	40.5105	16.5084	64.5126	3.90786	1.96638	0.035288	0.798886	Up
CL33036Contig1	33.024	8.80449	57.2435	6.50163	2.7008	0.00834012	0.382802	Up	gi|483517268|gb|EOB03845.1|Glycoprotein 25L, partial [Anas platyrhynchos]	8.95943e-116	sp|P27869|TMD11_CANFA	6e-106	Transmembrane emp24 domain-containing protein 11 OS=Canis familiaris GN=TMED11 PE=1 SV=1	KOG1690	3e-76	emp24/gp25L/p24 family of membrane trafficking proteins		GO:0016021;GO:0006810	integral component of membrane|transport
CL33096Contig1	20.4696	5.5028	35.4365	6.43971	2.687	0.0244152	0.665612	Up
CL33100Contig1	390.587	71.5365	709.638	9.91995	3.31033	1.11273e-06	0.000418114	Up	gi|514733308|ref|XP_005016815.1|PREDICTED: lymphocyte activation gene 3 protein [Anas platyrhynchos]	0	sp|Q61790|LAG3_MOUSE	6e-42	Lymphocyte activation gene 3 protein OS=Mus musculus GN=Lag3 PE=2 SV=1	KOG3509	8e-06	Basement membrane-specific heparan sulfate proteoglycan (HSPG) core protein		GO:0045085;GO:0009897;GO:0004888;GO:0050868;GO:0045954;GO:0007166;GO:0042289	negative regulation of interleukin-2 biosynthetic process|external side of plasma membrane|transmembrane signaling receptor activity|negative regulation of T cell activation|positive regulation of natural killer cell mediated cytotoxicity|cell surface receptor signaling pathway|MHC class II protein binding
CL33105Contig1	195.379	83.6426	307.116	3.67177	1.87647	0.00916903	0.397661	Up	gi|514741238|ref|XP_005018454.1|PREDICTED: neurotensin/neuromedin N isoform X1 [Anas platyrhynchos] >gi|514741242|ref|XP_005018455.1| PREDICTED: neurotensin/neuromedin N isoform X2 [Anas platyrhynchos]	8.74681e-63	sp|P01156|NEUT_BOVIN	4e-54	Neurotensin/neuromedin N OS=Bos taurus GN=NTS PE=1 SV=3				ko04080, Neuroactive ligand-receptor interaction;	GO:0005184;GO:0050880;GO:0005576;GO:0030133	neuropeptide hormone activity|regulation of blood vessel size|extracellular region|transport vesicle
CL33221Contig1	82.2308	0	164.462	Inf	Inf	1.56307e-09	1.48495e-06	Up	gi|2331059|gb|AAC60281.1|unknown [Gallus gallus]	8.55189e-16
CL33225Contig1	692.414	380.794	1004.03	2.63668	1.39872	0.0146626	0.509859	Up
CL33268Contig1	30.1062	6.60337	53.609	8.11844	3.0212	0.00499329	0.279042	Up
CL33285Contig1	39.0261	9.90505	68.1471	6.88003	2.78242	0.00486609	0.276991	Up
CL33339Contig1	30.0357	11.0056	49.0659	4.45826	2.15648	0.0337416	0.78581	Up
CL33387Contig1	35.1741	2.20112	68.1471	30.9602	4.95234	6.01368e-05	0.0116909	Up
CL33395Contig1	47.2486	0	94.4973	Inf	Inf	2.04347e-07	0.000107178	Up
CL33448Contig1	96.3523	47.3241	145.38	3.07202	1.61919	0.0418103	0.854721	Up
CL33459Contig1	63.802	23.1118	104.492	4.52117	2.17669	0.0124837	0.466288	Up	gi|507971205|ref|XP_004690632.1|PREDICTED: FXYD domain-containing ion transport regulator 3 [Condylura cristata]	2.60108e-10	sp|O97797|FXYD3_PIG	2e-12	FXYD domain-containing ion transport regulator 3 OS=Sus scrofa GN=FXYD3 PE=3 SV=1	KOG2133	3e-06	Transcriptional corepressor Atrophin-1/DRPLA
CL33503Contig1	38.1624	0	76.3247	Inf	Inf	1.1056e-06	0.000418114	Up
CL33532Contig1	122.319	42.9219	201.715	4.69959	2.23254	0.00449727	0.261179	Up
CL33649Contig1	443.568	132.067	755.07	5.71731	2.51534	8.39227e-05	0.0154784	Up	gi|483491812|gb|EOA93226.1|Cartilage intermediate layer protein 2 [Anas platyrhynchos]	6.09928e-20
CL33650Contig1	607.586	330.168	885.003	2.68046	1.42248	0.0150238	0.517823	Up	gi|514797694|ref|XP_005031658.1|PREDICTED: EF-hand calcium-binding domain-containing protein 12-like, partial [Anas platyrhynchos]	1.72313e-48	sp|Q95LL8|EFC12_MACFA	3e-10	EF-hand calcium-binding domain-containing protein 12 OS=Macaca fascicularis GN=EFCAB12 PE=2 SV=1
CL33665Contig1	26.7341	4.40224	49.0659	11.1457	3.47841	0.00272759	0.184935	Up	gi|529430378|ref|XP_005234997.1|PREDICTED: cysteine dioxygenase type 1 [Falco peregrinus]	1.31751e-116	sp|Q5RBQ7|CDO1_PONAB	2e-113	Cysteine dioxygenase type 1 OS=Pongo abelii GN=CDO1 PE=2 SV=1	KOG4064	8e-114	Cysteine dioxygenase CDO1	ko00270, Cysteine and methionine metabolism;ko00430, Taurine and hypotaurine metabolism;	GO:0017172;GO:0005829;GO:0008198;GO:0019448;GO:0051384;GO:0000097;GO:0055114;GO:0007595;GO:0006954;GO:0033762;GO:0045471;GO:0034641;GO:0042412;GO:0043200;GO:0051591	cysteine dioxygenase activity|cytosol|ferrous iron binding|L-cysteine catabolic process|response to glucocorticoid|sulfur amino acid biosynthetic process|oxidation-reduction process|lactation|inflammatory response|response to glucagon|response to ethanol|cellular nitrogen compound metabolic process|taurine biosynthetic process|response to amino acid|response to cAMP
CL33724Contig1	37.3752	6.60337	68.1471	10.3201	3.36738	0.00125549	0.112649	Up
CL33743Contig1	27.3803	6.60337	48.1573	7.29284	2.86648	0.0088184	0.393631	Up
CL33809Contig1	23.7458	6.60337	40.8882	6.19203	2.63041	0.0196179	0.604351	Up	gi|514729673|ref|XP_005015938.1|PREDICTED: heat shock factor protein 5 [Anas platyrhynchos]	6.33643e-113	sp|Q5ND04|HSF5_MOUSE	7e-82	Heat shock factor protein 5 OS=Mus musculus GN=Hsf5 PE=2 SV=1					GO:0006355;GO:0003700;GO:0043565;GO:0006351;GO:0005634	regulation of transcription, DNA-templated|sequence-specific DNA binding transcription factor activity|sequence-specific DNA binding|transcription, DNA-templated|nucleus
CL33875Contig1	45.2456	18.7095	71.7816	3.83663	1.93984	0.0335864	0.783555	Up
CL33885Contig1	39.1925	6.60337	71.7816	10.8705	3.44234	0.000916828	0.0887754	Up
CL33894Contig1	37.951	13.2067	62.6953	4.74722	2.24708	0.0194119	0.604212	Up
CL33900Contig1	134.444	51.7264	217.162	4.19828	2.0698	0.00712625	0.347688	Up
CL33916Contig1	78.5575	30.8157	126.299	4.09853	2.03511	0.0150075	0.517823	Up	gi|449278343|gb|EMC86197.1|Metabotropic glutamate receptor-like protein N [Columba livia]	2.07589e-16	sp|P83474|Y818_DROME	2e-08	Uncharacterized protein CG42266 OS=Drosophila melanogaster GN=CG42266 PE=2 SV=3	KOG4297	6e-09	C-type lectin		GO:0005737;GO:0005518;GO:0007155;GO:0005618;GO:0005509;GO:0018149;GO:0008270	cytoplasm|collagen binding|cell adhesion|cell wall|calcium ion binding|peptide cross-linking|zinc ion binding
CL33920Contig1	20188.5	11620.8	28756.2	2.47454	1.30716	0.0115549	0.448227	Up	gi|514708133|ref|XP_005010820.1|PREDICTED: diamine acetyltransferase 1 isoform X1 [Anas platyrhynchos]	2.64707e-32	sp|Q8AXL1|SAT1_CHICK	1e-36	Diamine acetyltransferase 1 OS=Gallus gallus GN=SAT1 PE=2 SV=1	KOG3216	2e-29	Diamine acetyltransferase	ko00330, Arginine and proline metabolism;	GO:0001525;GO:0019532;GO:0042127;GO:0015804;GO:0005515;GO:0015301;GO:0015108;GO:0005283;GO:0006821;GO:0008271;GO:0005829;GO:0019809;GO:0005975;GO:0030203;GO:0030424;GO:0006805;GO:0019531;GO:0016021;GO:0001504;GO:0004145;GO:0006596;GO:0055085;GO:0015186;GO:0050428;GO:0005886;GO:0008272;GO:0009447	angiogenesis|oxalate transport|regulation of cell proliferation|neutral amino acid transport|protein binding|anion:anion antiporter activity|chloride transmembrane transporter activity|sodium:amino acid symporter activity|chloride transport|secondary active sulfate transmembrane transporter activity|cytosol|spermidine binding|carbohydrate metabolic process|glycosaminoglycan metabolic process|axon…
CL33929Contig1	24.4625	4.40224	44.5228	10.1136	3.33823	0.00470575	0.271408	Up
CL33931Contig1	37.2088	9.90505	64.5126	6.5131	2.70334	0.00651548	0.329146	Up
CL34112Contig1	19.1067	5.5028	32.7106	5.94435	2.57152	0.0343813	0.790833	Up
CL3413Contig1	45.4569	5.5028	85.411	15.5214	3.95618	0.000164716	0.0261627	Up
CL34210Contig1	16.5472	2.20112	30.8933	14.0353	3.81098	0.00803807	0.373468	Up
CL3431Contig2	53.1547	0	106.309	Inf	Inf	7.9152e-08	4.59934e-05	Up
CL34360Contig1	360.904	38.5196	683.288	17.7387	4.14883	9.83302e-09	7.98552e-06	Up	gi|514725123|ref|XP_005014848.1|PREDICTED: lipocalin-like [Anas platyrhynchos]	1.39928e-88	sp|Q01584|LIPO_BUFMA	6e-69	Lipocalin OS=Bufo marinus PE=1 SV=1				ko00590, Arachidonic acid metabolism;	GO:0006629;GO:0005615;GO:0045187;GO:0006810;GO:0005791;GO:0005504;GO:0005215	lipid metabolic process|extracellular space|regulation of circadian sleep/wake cycle, sleep|transport|rough endoplasmic reticulum|fatty acid binding|transporter activity
CL34409Contig1	545.186	276.241	814.13	2.94718	1.55933	0.00902279	0.397564	Up	gi|483516871|gb|EOB03571.1|hypothetical protein Anapl_02228 [Anas platyrhynchos]	1.29393e-13
CL34433Contig1	1229.15	794.605	1663.7	2.09374	1.06608	0.0426518	0.862821	Up	gi|449281342|gb|EMC88425.1|Eukaryotic translation initiation factor 5A-1 [Columba livia]	2.7688e-48	sp|P11414|RPB1_CRIGR	4e-07	DNA-directed RNA polymerase II subunit RPB1 (Fragment) OS=Cricetulus griseus GN=POLR2A PE=3 SV=1	KOG0260	2e-07	RNA polymerase II, large subunit		GO:0005096;GO:0051056;GO:0043547	GTPase activator activity|regulation of small GTPase mediated signal transduction|positive regulation of GTPase activity
CL3443Contig1	39.218	12.1062	66.3298	5.47901	2.45391	0.0110761	0.443242	Up
CL34468Contig1	76.9321	33.0168	120.847	3.66018	1.87191	0.024773	0.671699	Up	gi|514729576|ref|XP_005015916.1|PREDICTED: c-C motif chemokine 4-like [Anas platyrhynchos]	5.09236e-39	sp|Q711P4|CCL4_PIG	1e-24	C-C motif chemokine 4 OS=Sus scrofa GN=CCL4 PE=3 SV=1				ko04064, NF-kappa B signaling pathway;ko04060, Cytokine-cytokine receptor interaction;ko05132, Salmonella infection;ko04062, Chemokine signaling pathway;ko04620, Toll-like receptor signaling pathway;ko04623, Cytosolic DNA-sensing pathway;	GO:0030593;GO:0006954;GO:0071407;GO:0009636;GO:0045671;GO:0014808;GO:0050918;GO:0007010;GO:0070374;GO:0043525;GO:0031663;GO:0070723;GO:0005829;GO:0005615;GO:0051928;GO:0016004;GO:0050850;GO:0051930;GO:0048246;GO:0045944;GO:0001649;GO:0008009;GO:0043922;GO:0010629;GO:0043308;GO:0004698;GO:0010818;GO:2000503;GO:0007267;GO:0043491;GO:0002548;GO:0050729;GO:0019722;GO:0032760;GO:0050718;GO:0008360;GO:…	neutrophil chemotaxis|inflammatory response|cellular response to organic cyclic compound|response to toxic substance|negative regulation of osteoclast differentiation|release of sequestered calcium ion into cytosol by sarcoplasmic reticulum|positive chemotaxis|cytoskeleton organization|positive regulation of ERK1 and ERK2 cascade|positive regulation of neuron apoptotic process|lipopolysaccharide-…
CL3447Contig1	42.635	4.40224	80.8679	18.3697	4.19926	0.0001153	0.0196131	Up
CL34523Contig1	156.283	78.1398	234.426	3.00008	1.585	0.0318918	0.761757	Up
CL34542Contig1	62.9189	28.6146	97.2232	3.39768	1.76455	0.0395996	0.838822	Up
CL34649Contig1	2255.69	906.862	3604.53	3.97472	1.99085	8.77457e-05	0.0158924	Up	gi|514719596|ref|XP_005013548.1|PREDICTED: placenta-specific gene 8 protein-like isoform X2 [Anas platyrhynchos]	2.50021e-29	sp|Q3ZCB2|PLAC8_BOVIN	4e-16	Placenta-specific gene 8 protein OS=Bos taurus GN=PLAC8 PE=3 SV=1					GO:0050873;GO:0045944;GO:0042742;GO:0009409;GO:0008284;GO:0040015;GO:0043066;GO:0003682	brown fat cell differentiation|positive regulation of transcription from RNA polymerase II promoter|defense response to bacterium|response to cold|positive regulation of cell proliferation|negative regulation of multicellular organism growth|negative regulation of apoptotic process|chromatin binding
CL34673Contig1	581.191	340.073	822.308	2.41803	1.27383	0.0299373	0.741816	Up	gi|514718295|ref|XP_005013233.1|PREDICTED: macrophage mannose receptor 1-like [Anas platyrhynchos]	0	sp|P22897|MRC1_HUMAN	0	Macrophage mannose receptor 1 OS=Homo sapiens GN=MRC1 PE=1 SV=1	KOG4297	0	C-type lectin	ko04145, Phagosome;ko05152, Tuberculosis;	GO:0030246	carbohydrate binding
CL34774Contig1	50.8831	0	101.766	Inf	Inf	1.12802e-07	6.24143e-05	Up
CL34780Contig1	1083.19	532.671	1633.71	3.06702	1.61684	0.0028344	0.190403	Up	gi|513202702|ref|XP_414027.4|PREDICTED: phosphatidylcholine-sterol acyltransferase isoform X2 [Gallus gallus]	0	sp|P53760|LCAT_CHICK	0	Phosphatidylcholine-sterol acyltransferase (Fragment) OS=Gallus gallus GN=LCAT PE=2 SV=1	KOG2369	0	Lecithin:cholesterol acyltransferase (LCAT)/Acyl-ceramide synthase	ko00564, Glycerophospholipid metabolism;	GO:0004607;GO:0042158;GO:0043691;GO:0006656;GO:0034372;GO:0034375;GO:0034364;GO:0034435;GO:0042632;GO:0008203;GO:0090107;GO:0034186	phosphatidylcholine-sterol O-acyltransferase activity|lipoprotein biosynthetic process|reverse cholesterol transport|phosphatidylcholine biosynthetic process|very-low-density lipoprotein particle remodeling|high-density lipoprotein particle remodeling|high-density lipoprotein particle|cholesterol esterification|cholesterol homeostasis|cholesterol metabolic process|regulation of high-density lipop…
CL34781Contig1	165.306	25.3129	305.299	12.061	3.59228	8.7845e-06	0.0025866	Up	gi|524992234|ref|XP_005043972.1|PREDICTED: uncharacterized protein LOC101817921, partial [Ficedula albicollis]	4.8414e-72	sp|P11283|POL_MMTVC	1e-87	Gag-Pro-Pol polyprotein OS=Mouse mammary tumor virus (strain C3H) GN=gag-pro-pol PE=1 SV=2	KOG0017	7e-28	FOG: Transposon-encoded proteins with TYA, reverse transcriptase, integrase domains in various combinations		GO:0046718;GO:0090305;GO:0003723;GO:0006310;GO:0008270;GO:0006278;GO:0003887;GO:0003964;GO:0004523;GO:0003677;GO:0075713;GO:0015074	viral entry into host cell|nucleic acid phosphodiester bond hydrolysis|RNA binding|DNA recombination|zinc ion binding|RNA-dependent DNA replication|DNA-directed DNA polymerase activity|RNA-directed DNA polymerase activity|RNA-DNA hybrid ribonuclease activity|DNA binding|establishment of integrated proviral latency|DNA integration
CL3479Contig1	665.347	382.995	947.699	2.47444	1.3071	0.0230633	0.649818	Up	gi|524980151|ref|XP_005038124.1|PREDICTED: probable phospholipid-transporting ATPase IB [Ficedula albicollis]	0	sp|Q9NTI2|AT8A2_HUMAN	0	Probable phospholipid-transporting ATPase IB OS=Homo sapiens GN=ATP8A2 PE=1 SV=2	KOG0206	0	P-type ATPase		GO:0016021;GO:0003011;GO:0042755;GO:0019829;GO:0005524;GO:0015914;GO:0043588;GO:0007409;GO:0000287;GO:0007568;GO:0050884;GO:0004012;GO:0006812;GO:0040018	integral component of membrane|involuntary skeletal muscle contraction|eating behavior|cation-transporting ATPase activity|ATP binding|phospholipid transport|skin development|axonogenesis|magnesium ion binding|aging|neuromuscular process controlling posture|phospholipid-translocating ATPase activity|cation transport|positive regulation of multicellular organism growth
CL34860Contig1	140.293	19.8101	260.776	13.1638	3.7185	8.96561e-06	0.00262458	Up
CL34880Contig1	806.172	341.174	1271.17	3.72587	1.89758	0.000853141	0.0847269	Up	gi|514791217|ref|XP_005030168.1|PREDICTED: GTP-binding protein GEM [Anas platyrhynchos] >gi|483497710|gb|EOA93933.1| GTP-binding protein GEM, partial [Anas platyrhynchos]	2.18234e-155	sp|P55040|GEM_HUMAN	4e-165	GTP-binding protein GEM OS=Homo sapiens GN=GEM PE=1 SV=1	KOG0395	1e-165	Ras-related GTPase		GO:0007264;GO:0019003;GO:0006184;GO:0000287;GO:0003924;GO:0005525;GO:0005634;GO:0009898	small GTPase mediated signal transduction|GDP binding|GTP catabolic process|magnesium ion binding|GTPase activity|GTP binding|nucleus|cytoplasmic side of plasma membrane
CL34955Contig1	139.929	0	279.857	Inf	Inf	4.11049e-12	6.90015e-09	Up
CL34979Contig1	63.8275	28.6146	99.0404	3.46119	1.79127	0.0364744	0.804503	Up	gi|513180308|ref|XP_004940676.1|PREDICTED: 60S ribosomal protein L36a isoform X2 [Gallus gallus]	4.92843e-09
CL34991Contig1	41.3936	11.0056	71.7816	6.52227	2.70537	0.00530569	0.289988	Up	gi|514738139|ref|XP_005017728.1|PREDICTED: heat shock transcription factor, X-linked-like [Anas platyrhynchos]	3.11202e-54	sp|Q96LI6|HSFY1_HUMAN	9e-35	Heat shock transcription factor, Y-linked OS=Homo sapiens GN=HSFY1 PE=1 SV=1	KOG0627	2e-35	Heat shock transcription factor		GO:0006355;GO:0003700;GO:0043565;GO:0006950;GO:0005634	regulation of transcription, DNA-templated|sequence-specific DNA binding transcription factor activity|sequence-specific DNA binding|response to stress|nucleus
CL35002Contig1	6.36039	0	12.7208	Inf	Inf	0.0454118	0.885449	Up	gi|558133672|ref|XP_006116926.1|PREDICTED: kallikrein-11-like [Pelodiscus sinensis]	3.21502e-51	sp|Q7JIG6|KLK15_SAGOE	1e-55	Kallikrein-15 OS=Saguinus oedipus GN=KLK15 PE=3 SV=1	KOG3627	1e-54	Trypsin		GO:0005576;GO:0006508;GO:0004252	extracellular region|proteolysis|serine-type endopeptidase activity
CL35006Contig1	6352.82	2716.18	9989.45	3.67775	1.87882	0.000133736	0.0222236	Up	gi|51471710|gb|AAU04400.1|chemokine C-C motif ligand 19 precursor [Anas platyrhynchos]	2.82807e-38	sp|O70460|CCL19_MOUSE	1e-16	C-C motif chemokine 19 OS=Mus musculus GN=Ccl19 PE=1 SV=1				ko04064, NF-kappa B signaling pathway;ko04060, Cytokine-cytokine receptor interaction;ko04062, Chemokine signaling pathway;	GO:0070374;GO:0090023;GO:0034695;GO:0006955;GO:0005615;GO:0043123;GO:0002408;GO:0008009;GO:0071731;GO:0045860;GO:0001768;GO:0043552;GO:2000107;GO:0031735;GO:0046330;GO:0051897;GO:0051209;GO:0042346	positive regulation of ERK1 and ERK2 cascade|positive regulation of neutrophil chemotaxis|response to prostaglandin E|immune response|extracellular space|positive regulation of I-kappaB kinase/NF-kappaB signaling|myeloid dendritic cell chemotaxis|chemokine activity|response to nitric oxide|positive regulation of protein kinase activity|establishment of T cell polarity|positive regulation of phosp…
CL3501Contig1	33.7662	12.1062	55.4263	4.57835	2.19483	0.0260072	0.698669	Up
CL35041Contig1	1688.66	1052.14	2325.18	2.20996	1.14402	0.0244723	0.666399	Up
CL35049Contig1	131.603	66.0337	197.172	2.98593	1.57818	0.037263	0.813068	Up
CL35135Contig1	135.116	59.4303	210.802	3.54704	1.82662	0.0164138	0.545693	Up
CL35168Contig1	219.171	2.20112	436.141	198.145	7.63041	4.44877e-13	1.12e-09	Up
CL35178Contig1	17.7182	0	35.4365	Inf	Inf	0.000320903	0.041882	Up
CL35189Contig1	261.376	90.246	432.507	4.79253	2.26079	0.00114004	0.10427	Up
CL35196Contig1	3271.37	967.393	5575.34	5.76326	2.52689	6.06548e-07	0.00025364	Up	gi|513236338|ref|XP_003643450.2|PREDICTED: alpha-tectorin-like isoformX2 [Gallus gallus]	6.94837e-122	sp|Q9YH85|TECTA_CHICK	2e-69	Alpha-tectorin OS=Gallus gallus GN=TECTA PE=1 SV=1	KOG4291	2e-76	Mucin/alpha-tectorin		GO:0007160	cell-matrix adhesion
CL35290Contig1	112.516	45.123	179.908	3.98706	1.99533	0.0112981	0.443242	Up	gi|326927821|ref|XP_003210087.1|PREDICTED: metalloproteinase inhibitor 4-like [Meleagris gallopavo]	4.06056e-120	sp|Q99727|TIMP4_HUMAN	8e-121	Metalloproteinase inhibitor 4 OS=Homo sapiens GN=TIMP4 PE=1 SV=1	KOG4745	2e-121	Metalloproteinase inhibitor TIMP and related proteins		GO:0005576;GO:0008191	extracellular region|metalloendopeptidase inhibitor activity
CL35310Contig1	94.3431	45.123	143.563	3.1816	1.66975	0.0367718	0.804998	Up
CL35354Contig1	116.867	42.9219	190.812	4.44556	2.15237	0.00633379	0.327762	Up	gi|527245786|ref|XP_005141229.1|PREDICTED: ceruloplasmin [Melopsittacus undulatus]	8.41995e-35	sp|P00450|CERU_HUMAN	2e-27	Ceruloplasmin OS=Homo sapiens GN=CP PE=1 SV=1	KOG1263	5e-28	Multicopper oxidases		GO:0005615;GO:0006825;GO:0006879;GO:0051087;GO:0005507;GO:0004322;GO:0055114	extracellular space|copper ion transport|cellular iron ion homeostasis|chaperone binding|copper ion binding|ferroxidase activity|oxidation-reduction process
CL35363Contig1	2732.61	1077.45	4387.76	4.07236	2.02587	5.36936e-05	0.0110348	Up	gi|527272456|ref|XP_005154067.1|PREDICTED: DNA damage-inducible transcript 4 protein [Melopsittacus undulatus]	6.54841e-76	sp|Q08E62|DDIT4_BOVIN	2e-67	DNA damage-inducible transcript 4 protein OS=Bos taurus GN=DDIT4 PE=2 SV=1				ko04150, mTOR signaling pathway;ko04151, PI3K-Akt signaling pathway;ko05206, MicroRNAs in cancer;	GO:0001764;GO:0032007;GO:1901216;GO:0048011;GO:0008283;GO:0051607;GO:0005829;GO:0007420;GO:0001666;GO:0071889;GO:0045820;GO:0072593;GO:0043241;GO:0042771;GO:0010801;GO:0033137;GO:0005739;GO:0030182	neuron migration|negative regulation of TOR signaling|positive regulation of neuron death|neurotrophin TRK receptor signaling pathway|cell proliferation|defense response to virus|cytosol|brain development|response to hypoxia|14-3-3 protein binding|negative regulation of glycolytic process|reactive oxygen species metabolic process|protein complex disassembly|intrinsic apoptotic signaling pathway i…
CL35403Contig1	151.522	70.4359	232.609	3.30242	1.72352	0.0207876	0.631669	Up	gi|449268958|gb|EMC79776.1|hypothetical protein A306_12684 [Columba livia]	1.79004e-30	sp|Q9H6K5|YS027_HUMAN	7e-11	Putative uncharacterized protein FLJ22184 OS=Homo sapiens PE=2 SV=1
CL3540Contig1	25.659	7.70393	43.6141	5.66129	2.50113	0.0215816	0.641504	Up
CL35481Contig1	99.5325	47.3241	151.741	3.20642	1.68096	0.0340464	0.787446	Up
CL35524Contig1	4618.23	3065.06	6171.4	2.01347	1.00968	0.0354111	0.798886	Up	gi|543368122|ref|XP_005527411.1|PREDICTED: TSC22 domain family protein 3 isoform X1 [Pseudopodoces humilis]	2.50064e-86	sp|Q9Z2S7|T22D3_MOUSE	2e-37	TSC22 domain family protein 3 OS=Mus musculus GN=Tsc22d3 PE=1 SV=2	KOG4797	8e-34	Transcriptional regulator		GO:0003700;GO:0006355	sequence-specific DNA binding transcription factor activity|regulation of transcription, DNA-templated
CL35534Contig1	104.159	6.60337	201.715	30.5474	4.93298	3.5133e-07	0.000164138	Up
CL35545Contig1	50.3135	14.3073	86.3196	6.03326	2.59294	0.00519214	0.286886	Up	gi|355749040|gb|EHH53523.1|hypothetical protein EGM_14182, partial [Macaca fascicularis]	1.40547e-12	sp|Q2EG98|PK1L3_MOUSE	2e-07	Polycystic kidney disease protein 1-like 3 OS=Mus musculus GN=Pkd1l3 PE=2 SV=2	KOG1216	6e-08	von Willebrand factor and related coagulation proteins		GO:0016021;GO:0007157;GO:0009405	integral component of membrane|heterophilic cell-cell adhesion|pathogenesis
CL3554Contig1	21.4742	6.60337	36.3451	5.50403	2.46049	0.0330555	0.775212	Up
CL35557Contig1	856.881	401.705	1312.06	3.26623	1.70762	0.00231796	0.164615	Up
CL35572Contig1	403.096	162.883	643.308	3.94951	1.98167	0.00183771	0.142213	Up	gi|449265732|gb|EMC76880.1|Putative uncharacterized transposon-derived protein ZK1236.4, partial [Columba livia]	1.87386e-06
CL35615Contig1	455.059	258.632	651.486	2.51897	1.33283	0.0291162	0.727197	Up
CL35727Contig1	223.068	0	446.136	Inf	Inf	5.40725e-15	1.94472e-11	Up
CL35760Contig1	141.298	20.9107	261.685	12.5144	3.64552	1.18747e-05	0.00328519	Up	gi|483501436|gb|EOA95141.1|Collagen alpha-1(XI) chain, partial [Anas platyrhynchos]	7.27623e-06
CL35764Contig1	216.15	56.1286	376.172	6.70196	2.74458	0.000189491	0.0286519	Up	gi|307201906|gb|EFN81535.1|hypothetical protein EAI_11462 [Harpegnathos saltator]	1.94177e-17
CL35774Contig1	110.949	1.10056	220.797	200.622	7.64833	5.65795e-10	6.06135e-07	Up
CL35798Contig1	146.807	52.8269	240.786	4.55802	2.18841	0.00412609	0.244703	Up
CL35900Contig1	101.062	44.0224	158.101	3.59138	1.84454	0.0204837	0.625835	Up
CL35968Contig1	96.6341	29.7151	163.553	5.50403	2.46049	0.00284543	0.190403	Up
CL35981Contig1	113.687	42.9219	184.451	4.29738	2.10346	0.00775606	0.365661	Up
CL35Contig1	158.58	83.6426	233.517	2.79185	1.48122	0.0437998	0.872375	Up
CL3601Contig1	15.1843	2.20112	28.1675	12.7969	3.67772	0.0124928	0.466288	Up	gi|514753574|ref|XP_005021399.1|PREDICTED: immunoglobulin superfamily containing leucine-rich repeat protein 2 [Anas platyrhynchos]	0	sp|Q6UXK2|ISLR2_HUMAN	5e-141	Immunoglobulin superfamily containing leucine-rich repeat protein 2 OS=Homo sapiens GN=ISLR2 PE=2 SV=1	KOG0619	1e-141	FOG: Leucine rich repeat
CL36038Contig1	437.508	177.19	697.826	3.93829	1.97757	0.00161768	0.131586	Up	gi|514763343|ref|XP_005023713.1|PREDICTED: probable G-protein coupled receptor 171 isoform X1 [Anas platyrhynchos] >gi|514763347|ref|XP_005023714.1| PREDICTED: probable G-protein coupled receptor 171 isoform X2 [Anas platyrhynchos]	5.68225e-175	sp|O14626|GP171_HUMAN	1e-156	Probable G-protein coupled receptor 171 OS=Homo sapiens GN=GPR171 PE=2 SV=1	KOG3656	6e-16	FOG: 7 transmembrane receptor		GO:0016021;GO:0007186;GO:0005886;GO:0004930	integral component of membrane|G-protein coupled receptor signaling pathway|plasma membrane|G-protein coupled receptor activity
CL36040Contig1	89.2241	38.5196	139.929	3.63266	1.86103	0.0220254	0.642775	Up	gi|483497520|gb|EOA93865.1|Interferon-induced transmembrane protein 5, partial [Anas platyrhynchos]	2.52715e-27	sp|A6NNB3|IFM5_HUMAN	5e-16	Interferon-induced transmembrane protein 5 OS=Homo sapiens GN=IFITM5 PE=2 SV=1					GO:0016021;GO:0030282;GO:0009607;GO:0005886	integral component of membrane|bone mineralization|response to biotic stimulus|plasma membrane
CL36045Contig1	252.392	112.257	392.527	3.49668	1.80598	0.00857177	0.38743	Up
CL36078Contig1	64.3778	29.7151	99.0404	3.33299	1.73682	0.0418489	0.854721	Up	gi|483523519|gb|EOB07799.1|hypothetical protein Anapl_03807 [Anas platyrhynchos]	6.01224e-13
CL36086Contig1	890.354	389.599	1391.11	3.57062	1.83618	0.0010399	0.0976868	Up	gi|514782982|ref|XP_005028214.1|PREDICTED: runt-related transcription factor 3, partial [Anas platyrhynchos]	0	sp|Q13761|RUNX3_HUMAN	0	Runt-related transcription factor 3 OS=Homo sapiens GN=RUNX3 PE=1 SV=2	KOG3982	0	Runt and related transcription factors		GO:0007411;GO:0048469;GO:0000122;GO:0002062;GO:0005515;GO:0006366;GO:0000977;GO:0045786;GO:0000981;GO:0005737;GO:0048935;GO:0031069;GO:0006468;GO:0032609;GO:0050680;GO:0000790;GO:0005524	axon guidance|cell maturation|negative regulation of transcription from RNA polymerase II promoter|chondrocyte differentiation|protein binding|transcription from RNA polymerase II promoter|RNA polymerase II regulatory region sequence-specific DNA binding|negative regulation of cell cycle|sequence-specific DNA binding RNA polymerase II transcription factor activity|cytoplasm|peripheral nervous sys…
CL36121Contig1	138.61	68.2348	208.984	3.06272	1.61482	0.0319404	0.762196	Up	gi|326923875|ref|XP_003208158.1|PREDICTED: semaphorin-4G-like [Meleagris gallopavo]	0	sp|Q9NTN9|SEM4G_HUMAN	0	Semaphorin-4G OS=Homo sapiens GN=SEMA4G PE=2 SV=1	KOG3611	6e-135	Semaphorins	ko04360, Axon guidance;	GO:0004872;GO:0016021;GO:0007275	receptor activity|integral component of membrane|multicellular organismal development
CL361Contig1	120.456	52.8269	188.086	3.56042	1.83205	0.0180106	0.579459	Up	gi|514766704|ref|XP_005024515.1|PREDICTED: protein crumbs homolog 2 isoform X1 [Anas platyrhynchos]	0	sp|Q5IJ48|CRUM2_HUMAN	3e-61	Protein crumbs homolog 2 OS=Homo sapiens GN=CRB2 PE=1 SV=2	KOG1217	1e-56	Fibrillins and related proteins containing Ca2+-binding EGF-like domains	ko04390, Hippo signaling pathway;ko04391, Hippo signaling pathway -fly;	GO:0005509	calcium ion binding
CL36217Contig1	246.224	114.458	377.989	3.30242	1.72352	0.0122567	0.46335	Up	gi|514716636|ref|XP_005012836.1|PREDICTED: osteopontin [Anas platyrhynchos]	3.75706e-135	sp|P23498|OSTP_CHICK	4e-93	Osteopontin OS=Gallus gallus GN=SPP1 PE=2 SV=3				ko04510, Focal adhesion;ko04151, PI3K-Akt signaling pathway;ko04512, ECM-receptor interaction;ko04620, Toll-like receptor signaling pathway;	GO:0001503;GO:0031214;GO:0005125;GO:0005615;GO:0050840;GO:0010811;GO:0007155;GO:0033280;GO:0031012;GO:0005737;GO:0045177;GO:0030593	ossification|biomineral tissue development|cytokine activity|extracellular space|extracellular matrix binding|positive regulation of cell-substrate adhesion|cell adhesion|response to vitamin D|extracellular matrix|cytoplasm|apical part of cell|neutrophil chemotaxis
CL36270Contig1	153.077	72.637	233.517	3.21485	1.68475	0.0234331	0.65306	Up
CL36276Contig1	410.23	192.598	627.862	3.25996	1.70485	0.00664852	0.331117	Up	gi|558103465|ref|XP_006110328.1|PREDICTED: free fatty acid receptor 3-like [Pelodiscus sinensis]	4.33691e-52	sp|Q3UFD7|FFAR3_MOUSE	3e-45	Free fatty acid receptor 3 OS=Mus musculus GN=Ffar3 PE=2 SV=1				ko04024, cAMP signaling pathway;
CL36282Contig1	270.743	150.777	390.71	2.59131	1.37368	0.0402024	0.846811	Up
CL36309Contig1	75.998	27.514	124.482	4.52431	2.1777	0.0101374	0.421145	Up
CL36371Contig1	301.317	121.062	481.573	3.97791	1.99201	0.00294782	0.193767	Up	gi|514732869|ref|XP_005016703.1|PREDICTED: chemokine XC receptor 1 [Anas platyrhynchos]	0	sp|P46094|XCR1_HUMAN	3e-99	Chemokine XC receptor 1 OS=Homo sapiens GN=XCR1 PE=1 SV=1	KOG3656	3e-58	FOG: 7 transmembrane receptor	ko04060, Cytokine-cytokine receptor interaction;ko04062, Chemokine signaling pathway;	GO:0004950;GO:0016021;GO:0051209;GO:0006935;GO:0070098;GO:0007186	chemokine receptor activity|integral component of membrane|release of sequestered calcium ion into cytosol|chemotaxis|chemokine-mediated signaling pathway|G-protein coupled receptor signaling pathway
CL36383Contig1	128.417	45.123	211.71	4.69185	2.23016	0.00424666	0.250086	Up	gi|529436342|ref|XP_005237938.1|PREDICTED: gamma-aminobutyric acid receptor subunit alpha-3-like [Falco peregrinus] >gi|541973197|ref|XP_005440038.1| PREDICTED: gamma-aminobutyric acid receptor subunit alpha-3-like [Falco cherrug]	0	sp|P34903|GBRA3_HUMAN	0	Gamma-aminobutyric acid receptor subunit alpha-3 OS=Homo sapiens GN=GABRA3 PE=2 SV=1	KOG3642	0	GABA receptor	ko04080, Neuroactive ligand-receptor interaction;ko05032, Morphine addiction;ko05033, Nicotine addiction;ko04723, Retrograde endocannabinoid signaling;ko04727, GABAergic synapse;	GO:0004890;GO:0045211;GO:0030054;GO:0005230;GO:0016021;GO:0007214;GO:0006821	GABA-A receptor activity|postsynaptic membrane|cell junction|extracellular ligand-gated ion channel activity|integral component of membrane|gamma-aminobutyric acid signaling pathway|chloride transport
CL36454Contig1	43.6907	16.5084	70.873	4.29314	2.10203	0.0232332	0.652289	Up
CL36475Contig1	95.655	34.1174	157.193	4.6074	2.20395	0.00688063	0.339654	Up	gi|514757132|ref|XP_005022241.1|PREDICTED: cholinesterase-like isoform X1 [Anas platyrhynchos] >gi|514757136|ref|XP_005022242.1| PREDICTED: cholinesterase-like isoform X2 [Anas platyrhynchos] >gi|514757140|ref|XP_005022243.1| PREDICTED: cholinesterase-like isoform X3 [Anas platyrhynchos] >gi|483509919|gb|EOA99392.1| Cholinesterase, partial [Anas platyrhynchos]	0	sp|P32749|CHLE_BOVIN	0	Cholinesterase OS=Bos taurus GN=BCHE PE=2 SV=2	KOG4389	0	Acetylcholinesterase/Butyrylcholinesterase		GO:0016020;GO:0005783;GO:0005641;GO:0004104	membrane|endoplasmic reticulum|nuclear envelope lumen|cholinesterase activity
CL36588Contig1	22427.9	9427.4	35428.3	3.75801	1.90997	0.00033493	0.0430206	Up	gi|543730684|ref|XP_005506394.1|PREDICTED: epidermal differentiation-specific protein-like [Columba livia]	3.57216e-82	sp|P46058|EDSP_CYNPY	4e-49	Epidermal differentiation-specific protein OS=Cynops pyrrhogaster PE=2 SV=1
CL36677Contig1	115.85	0	231.7	Inf	Inf	3.83086e-11	5.51108e-08	Up
CL36686Contig1	236.446	122.162	350.73	2.87102	1.52156	0.0271496	0.713097	Up	gi|514742272|ref|XP_005018697.1|PREDICTED: ankyrin-2 [Anas platyrhynchos]	0	sp|Q01484|ANK2_HUMAN	1e-129	Ankyrin-2 OS=Homo sapiens GN=ANK2 PE=1 SV=4	KOG4177	0	Ankyrin		GO:0007411;GO:0030507;GO:0086091;GO:0010628;GO:0005887;GO:0015459;GO:0036371;GO:0006874;GO:0072661;GO:0019901;GO:0086014;GO:0036309;GO:0043268;GO:0060048;GO:0033292;GO:0043034;GO:0070296;GO:0016323;GO:0050821;GO:0070972;GO:0034394;GO:0030674;GO:0005829;GO:0031430;GO:0086005;GO:0060307;GO:0086046;GO:0045211;GO:0051928;GO:0003283;GO:0051117;GO:0005856;GO:0010881;GO:1901018;GO:0030018;GO:0030315;GO:…	axon guidance|spectrin binding|regulation of heart rate by cardiac conduction|positive regulation of gene expression|integral component of plasma membrane|potassium channel regulator activity|protein localization to T-tubule|cellular calcium ion homeostasis|protein targeting to plasma membrane|protein kinase binding|atrial cardiac muscle cell action potential|protein localization to M-band|positi…
CL366Contig1	59.6172	22.0112	97.2232	4.41698	2.14306	0.0148075	0.513481	Up
CL36730Contig1	3234.85	2184.61	4285.09	1.96149	0.971947	0.0444484	0.880764	Up	gi|514706088|ref|XP_005010134.1|PREDICTED: N-myc-interactor isoform X1 [Anas platyrhynchos] >gi|514706090|ref|XP_005010135.1| PREDICTED: N-myc-interactor isoform X2 [Anas platyrhynchos]	2.21377e-173	sp|Q13287|NMI_HUMAN	1e-57	N-myc-interactor OS=Homo sapiens GN=NMI PE=1 SV=2					GO:0003676;GO:0005737;GO:0005634;GO:0000166	nucleic acid binding|cytoplasm|nucleus|nucleotide binding
CL36733Contig1	4243.98	1049.94	7438.03	7.08427	2.82462	2.87321e-08	2.03759e-05	Up	gi|527271919|ref|XP_005153815.1|PREDICTED: c-X-C chemokine receptor type 4 [Melopsittacus undulatus]	0	sp|P56491|CXCR4_PAPAN	0	C-X-C chemokine receptor type 4 OS=Papio anubis GN=CXCR4 PE=2 SV=1	KOG3656	0	FOG: 7 transmembrane receptor	ko04144, Endocytosis;ko04060, Cytokine-cytokine receptor interaction;ko04360, Axon guidance;ko04062, Chemokine signaling pathway;ko04670, Leukocyte transendothelial migration;ko04672, Intestinal immune network for IgA production;	GO:0001569;GO:0001764;GO:0007186;GO:0043217;GO:0061351;GO:0008354;GO:0016023;GO:0030426;GO:0001667;GO:0042119;GO:0030334;GO:0050920;GO:0016494;GO:0043130;GO:0031252;GO:0003779;GO:0007420;GO:0032027;GO:0031625;GO:0019955;GO:0001666;GO:0009897;GO:0016021;GO:0007281;GO:0048714;GO:0019722;GO:0008045;GO:0070098;GO:0042098	patterning of blood vessels|neuron migration|G-protein coupled receptor signaling pathway|myelin maintenance|neural precursor cell proliferation|germ cell migration|cytoplasmic membrane-bounded vesicle|growth cone|ameboidal cell migration|neutrophil activation|regulation of cell migration|regulation of chemotaxis|C-X-C chemokine receptor activity|ubiquitin binding|cell leading edge|actin binding|…
CL36746Contig1	60.7627	14.3073	107.218	7.49394	2.90573	0.00151735	0.125993	Up
CL36784Contig1	205.643	102.352	308.933	3.01834	1.59375	0.0242015	0.662986	Up
CL36786Contig1	209.578	69.3353	349.822	5.04536	2.33496	0.00127981	0.112794	Up	gi|483519714|gb|EOB05407.1|hypothetical protein Anapl_04616 [Anas platyrhynchos]	1.80163e-09
CL36806Contig1	133.6	26.4135	240.786	9.11604	3.18841	9.32451e-05	0.0165316	Up
CL36813Contig1	6258.28	610.811	11905.7	19.4917	4.28479	3.62617e-15	1.40447e-11	Up	gi|529419994|ref|XP_005229859.1|PREDICTED: 2'-5'-oligoadenylate synthase-like protein 2-like [Falco peregrinus] >gi|541952671|ref|XP_005432791.1| PREDICTED: 2'-5'-oligoadenylate synthase-like protein 2-like [Falco cherrug]	0	sp|Q9Z2F2|OASL2_MOUSE	3e-119	2'-5'-oligoadenylate synthase-like protein 2 OS=Mus musculus GN=Oasl2 PE=1 SV=2	KOG0001	1e-24	Ubiquitin and ubiquitin-like proteins		GO:0016779;GO:0005730;GO:0006955;GO:0003677;GO:0003725;GO:0005524;GO:0045071;GO:0005737;GO:0051607	nucleotidyltransferase activity|nucleolus|immune response|DNA binding|double-stranded RNA binding|ATP binding|negative regulation of viral genome replication|cytoplasm|defense response to virus
CL36823Contig1	10.9035	0	21.8071	Inf	Inf	0.00489571	0.276991	Up
CL36907Contig1	39.7683	13.2067	66.3298	5.02242	2.32838	0.0148552	0.51478	Up
CL36931Contig1	48.7137	22.0112	75.4161	3.42626	1.77663	0.0470132	0.903136	Up
CL36998Contig1	96.4615	12.1062	180.817	14.9359	3.90071	1.61337e-05	0.00406174	Up	gi|514718829|ref|XP_005013358.1|PREDICTED: coiled-coil domain-containing protein 180-like [Anas platyrhynchos]	0	sp|Q9P1Z9|CC180_HUMAN	1e-110	Coiled-coil domain-containing protein 180 OS=Homo sapiens GN=CCDC180 PE=2 SV=2
CL37010Contig1	16.0929	2.20112	29.9847	13.6225	3.76792	0.00929952	0.400548	Up
CL37037Contig1	32.0194	7.70393	56.3349	7.31249	2.87036	0.00602775	0.315164	Up
CL3713Contig1	30.0102	5.5028	54.5177	9.90725	3.30848	0.00269902	0.184181	Up	gi|513177796|ref|XP_004940396.1|PREDICTED: uncharacterized protein LOC101749451 [Gallus gallus]	2.34367e-06
CL37145Contig1	371.724	79.2404	664.207	8.38217	3.06732	5.88937e-06	0.00183047	Up	gi|543749719|ref|XP_005515578.1|PREDICTED: uncharacterized protein LOC102094822 isoform X1 [Columba livia]	4.5197e-134	sp|P31792|POL_FENV1	3e-89	Pol polyprotein (Fragment) OS=Feline endogenous virus ECE1 GN=pol PE=3 SV=1	KOG0017	4e-22	FOG: Transposon-encoded proteins with TYA, reverse transcriptase, integrase domains in various combinations		GO:0019028;GO:0046718;GO:0090305;GO:0003723;GO:0006310;GO:0008270;GO:0006278;GO:0019068;GO:0003887;GO:0003964;GO:0004523;GO:0003677;GO:0006508;GO:0075713;GO:0004190;GO:0005198;GO:0015074	viral capsid|viral entry into host cell|nucleic acid phosphodiester bond hydrolysis|RNA binding|DNA recombination|zinc ion binding|RNA-dependent DNA replication|virion assembly|DNA-directed DNA polymerase activity|RNA-directed DNA polymerase activity|RNA-DNA hybrid ribonuclease activity|DNA binding|proteolysis|establishment of integrated proviral latency|aspartic-type endopeptidase activity|struc…
CL37288Contig1	105.023	16.5084	193.538	11.7236	3.55134	4.37209e-05	0.00940765	Up
CL37299Contig1	6350.93	1897.37	10804.5	5.69447	2.50956	6.0953e-07	0.00025364	Up	gi|557368241|gb|AGZ95152.1|apolipoprotein A-I [Anser anser]	6.95369e-134	sp|O42296|APOA1_ANAPL	2e-169	Apolipoprotein A-I OS=Anas platyrhynchos GN=APOA1 PE=2 SV=1	KOG4744	5e-07	Uncharacterized conserved protein	ko05143, African trypanosomiasis;ko04975, Fat digestion and absorption;ko04977, Vitamin digestion and absorption;ko03320, PPAR signaling pathway;	GO:0070508;GO:0030139;GO:0050728;GO:0001935;GO:0051347;GO:0033344;GO:0001932;GO:0045445;GO:0034115;GO:0018206;GO:0030300;GO:0043691;GO:0008211;GO:0005543;GO:0002740;GO:0032489;GO:0050713;GO:0018158;GO:0006656;GO:0001540;GO:0043534;GO:0060228;GO:0042632;GO:0015485;GO:0034191;GO:0019915;GO:0051346;GO:0042802;GO:0006695;GO:0010903;GO:0010804;GO:0034380;GO:0007186;GO:0042158;GO:0050821;GO:0034361;GO:…	cholesterol import|endocytic vesicle|negative regulation of inflammatory response|endothelial cell proliferation|positive regulation of transferase activity|cholesterol efflux|regulation of protein phosphorylation|myoblast differentiation|negative regulation of heterotypic cell-cell adhesion|peptidyl-methionine modification|regulation of intestinal cholesterol absorption|reverse cholesterol trans…
CL37301Contig1	55.074	22.0112	88.1369	4.00418	2.00151	0.0236789	0.657438	Up
CL37360Contig1	53.8071	23.1118	84.5024	3.65625	1.87036	0.0341504	0.788402	Up
CL3743Contig2	17.0975	3.30168	30.8933	9.35685	3.22602	0.0160737	0.537932	Up
CL37485Contig1	170.674	66.0337	275.314	4.1693	2.05981	0.00546289	0.296084	Up	gi|514730627|ref|XP_005016167.1|PREDICTED: CMRF35-like molecule 2-like [Anas platyrhynchos]	2.48819e-47	sp|Q496F6|CLM2_HUMAN	1e-16	CMRF35-like molecule 2 OS=Homo sapiens GN=CD300E PE=1 SV=2
CL37492Contig1	853.585	4.40224	1702.77	386.796	8.59543	2.59124e-24	3.26179e-20	Up
CL3751Contig1	23.9122	3.30168	44.5228	13.4849	3.75327	0.00241618	0.170388	Up
CL37528Contig1	435.498	253.129	617.867	2.44092	1.28742	0.0361964	0.804503	Up
CL37603Contig1	53.4487	24.2123	82.6851	3.415	1.77189	0.0441507	0.877526	Up
CL3768Contig1	32.4993	13.2067	51.7918	3.92162	1.97145	0.0452036	0.885449	Up
CL37727Contig1	36.3002	9.90505	62.6953	6.32963	2.66212	0.00756583	0.359046	Up
CL37746Contig1	112.177	30.8157	193.538	6.28049	2.65088	0.00111562	0.102318	Up
CL37757Contig1	87.5223	24.2123	150.832	6.22956	2.63913	0.00182682	0.142213	Up	gi|449280785|gb|EMC88011.1|Putative uncharacterized transposon-derived protein ZK1236.4, partial [Columba livia]	5.62836e-08
CL37773Contig1	155.963	48.4247	263.502	5.44148	2.444	0.00139618	0.119556	Up
CL37774Contig1	48.8801	18.7095	79.0506	4.22515	2.079	0.0217694	0.641504	Up
CL37870Contig1	64.5891	16.5084	112.67	6.82499	2.77083	0.00205788	0.154191	Up
CL37893Contig1	23.7458	6.60337	40.8882	6.19203	2.63041	0.0196179	0.604351	Up
CL37906Contig1	125.563	17.609	233.517	13.2613	3.72915	1.24795e-05	0.00339651	Up
CL37940Contig1	55.4263	0	110.853	Inf	Inf	5.61609e-08	3.49106e-05	Up	gi|514749732|ref|XP_005020465.1|PREDICTED: kinesin-like protein KIF24 [Anas platyrhynchos]	7.38503e-12	sp|Q5T7B8|KIF24_HUMAN	2e-06	Kinesin-like protein KIF24 OS=Homo sapiens GN=KIF24 PE=1 SV=2	KOG0246	4e-07	Kinesin-like protein
CL37941Contig1	60.097	27.514	92.68	3.36846	1.75209	0.0423945	0.859059	Up
CL37946Contig1	47.4916	13.2067	81.7765	6.19203	2.63041	0.00512553	0.284537	Up
CL3799Contig1	18.9148	3.30168	34.5278	10.4577	3.38649	0.00947587	0.403655	Up
CL38034Contig1	50.5309	22.0112	79.0506	3.59138	1.84454	0.0385066	0.827801	Up
CL3804Contig1	1053.94	103.453	2004.43	19.3753	4.27615	2.77629e-12	5.37651e-09	Up	gi|514705787|ref|XP_005009988.1|PREDICTED: ubl carboxyl-terminal hydrolase 18 isoform X1 [Anas platyrhynchos] >gi|514705789|ref|XP_005009989.1| PREDICTED: ubl carboxyl-terminal hydrolase 18 isoform X2 [Anas platyrhynchos]	1.26463e-131	sp|Q9UMW8|UBP18_HUMAN	1e-82	Ubl carboxyl-terminal hydrolase 18 OS=Homo sapiens GN=USP18 PE=1 SV=1	KOG1863	3e-83	Ubiquitin carboxyl-terminal hydrolase		GO:0032020;GO:0006511;GO:0035634;GO:0004221;GO:0019785	ISG15-protein conjugation|ubiquitin-dependent protein catabolic process|response to stilbenoid|ubiquitin thiolesterase activity|ISG15-specific protease activity
CL38066Contig1	29.1271	11.0056	47.2486	4.29314	2.10203	0.0396642	0.838884	Up
CL38086Contig1	68.9148	8.80449	129.025	14.6545	3.87327	5.66542e-05	0.0113431	Up
CL38093Contig1	22.8117	1.10056	44.5228	40.4546	5.33823	0.000350186	0.0448657	Up	gi|543365270|ref|XP_005525996.1|PREDICTED: seizure protein 6 homolog [Pseudopodoces humilis]	2.1203e-54	sp|Q53EL9|SEZ6_HUMAN	2e-56	Seizure protein 6 homolog OS=Homo sapiens GN=SEZ6 PE=1 SV=2					GO:0005615;GO:0060079;GO:0043197;GO:0043198;GO:2000171;GO:1900006	extracellular space|regulation of excitatory postsynaptic membrane potential|dendritic spine|dendritic shaft|negative regulation of dendrite development|positive regulation of dendrite development
CL38105Contig1	807.514	434.722	1180.31	2.71509	1.441	0.0102065	0.422126	Up
CL38112Contig1	51.5355	23.1118	79.9592	3.45967	1.79064	0.0433693	0.868611	Up	gi|449508800|ref|XP_002191797.2|PREDICTED: uncharacterized protein LOC100229855 [Taeniopygia guttata]	4.07471e-77
CL38114Contig1	46.1991	8.80449	83.5937	9.49445	3.24708	0.000998073	0.0946402	Up
CL38118Contig1	96.4676	33.0168	159.918	4.84354	2.27606	0.00534894	0.291162	Up
CL38330Contig1	172.997	77.0393	268.954	3.49113	1.80369	0.0138082	0.496422	Up
CL38404Contig1	3192.24	1852.24	4532.23	2.44689	1.29095	0.00804035	0.373468	Up	gi|514703435|ref|XP_005008864.1|PREDICTED: tumor necrosis factor receptor superfamily member 18 [Anas platyrhynchos] >gi|483525683|gb|EOB09230.1| Tumor necrosis factor receptor superfamily member 18, partial [Anas platyrhynchos]	1.58566e-46	sp|O35714|TNR18_MOUSE	5e-08	Tumor necrosis factor receptor superfamily member 18 OS=Mus musculus GN=Tnfrsf18 PE=1 SV=1				ko04060, Cytokine-cytokine receptor interaction;	GO:0009897;GO:0005887	external side of plasma membrane|integral component of plasma membrane
CL38443Contig1	186.269	0	372.537	Inf	Inf	8.96456e-14	2.82109e-10	Up
CL38509Contig1	9000.74	5870.39	12131.1	2.06649	1.04718	0.0314858	0.760062	Up	gi|514742739|ref|XP_005018805.1|PREDICTED: uncharacterized protein LOC101790667 isoform X1 [Anas platyrhynchos] >gi|514742743|ref|XP_005018806.1| PREDICTED: uncharacterized protein LOC101790667 isoform X2 [Anas platyrhynchos] >gi|514742747|ref|XP_005018807.1| PREDICTED: uncharacterized protein LOC101790667 isoform X3 [Anas platyrhynchos] >gi|514742751|ref|XP_005018808.1| PREDICTED: uncharacterize…	2.91626e-76	sp|P63128|POK4_HUMAN	6e-31	HERV-K_6q14.1 provirus ancestral Gag-Pol polyprotein OS=Homo sapiens PE=3 SV=3					GO:0046718;GO:0019013;GO:0090305;GO:0039660;GO:0003723;GO:0006310;GO:0008270;GO:0006278;GO:0003887;GO:0003964;GO:0004523;GO:0003677;GO:0006508;GO:0075713;GO:0046080;GO:0000166;GO:0004190;GO:0015074	viral entry into host cell|viral nucleocapsid|nucleic acid phosphodiester bond hydrolysis|structural constituent of virion|RNA binding|DNA recombination|zinc ion binding|RNA-dependent DNA replication|DNA-directed DNA polymerase activity|RNA-directed DNA polymerase activity|RNA-DNA hybrid ribonuclease activity|DNA binding|proteolysis|establishment of integrated proviral latency|dUTP metabolic proc…
CL38518Contig1	52.9944	24.2123	81.7765	3.37747	1.75594	0.0462632	0.892149	Up
CL38547Contig1	695.984	406.107	985.861	2.42759	1.27952	0.0250258	0.677823	Up	gi|483513227|gb|EOB01423.1|hypothetical protein Anapl_06869, partial [Anas platyrhynchos]	1.93581e-19	sp|Q5RK28|NMES1_RAT	3e-12	Normal mucosa of esophagus-specific gene 1 protein OS=Rattus norvegicus GN=Nmes1 PE=3 SV=1					GO:0005634	nucleus
CL38589Contig1	125.934	58.3297	193.538	3.31799	1.73031	0.0239904	0.662247	Up
CL38663Contig1	93.4794	35.2179	151.741	4.30862	2.10723	0.00971672	0.411131	Up
CL38670Contig1	83.1394	0	166.279	Inf	Inf	1.39486e-09	1.35063e-06	Up
CL38693Contig1	134.828	56.1286	213.527	3.80425	1.92761	0.0116793	0.448905	Up
CL38731Contig1	62.2726	26.4135	98.1318	3.71522	1.89345	0.0282956	0.715742	Up
CL38799Contig1	67.9868	24.2123	111.761	4.61588	2.2066	0.0106307	0.432015	Up
CL38816Contig1	35.0332	11.0056	59.0608	5.36643	2.42396	0.0143516	0.502515	Up
CL38850Contig1	461.854	274.04	649.669	2.37071	1.24532	0.040571	0.84728	Up
CL38856Contig1	95.412	20.9107	169.913	8.12568	3.02249	0.000396968	0.0491099	Up
CL38873Contig1	94.1256	37.4191	150.832	4.03089	2.0111	0.0130988	0.482118	Up
CL38890Contig1	50.6269	23.1118	78.142	3.38105	1.75747	0.0477756	0.911883	Up	gi|543747542|ref|XP_005514527.1|PREDICTED: GTP-binding protein RAD [Columba livia]	2.91421e-107	sp|P55042|RAD_HUMAN	3e-114	GTP-binding protein RAD OS=Homo sapiens GN=RRAD PE=1 SV=2	KOG0395	7e-115	Ras-related GTPase		GO:0007264;GO:0005622;GO:0006184;GO:0003924;GO:0016020;GO:0005525	small GTPase mediated signal transduction|intracellular|GTP catabolic process|GTPase activity|membrane|GTP binding
CL38912Contig1	407.267	200.302	614.232	3.06653	1.61661	0.0099537	0.416954	Up	gi|483517897|gb|EOB04283.1|hypothetical protein Anapl_04706 [Anas platyrhynchos]	2.13623e-32
CL38919Contig1	567.875	348.878	786.871	2.25544	1.17341	0.0458104	0.888179	Up	gi|527265463|ref|XP_005150939.1|PREDICTED: ribonuclease UK114 [Melopsittacus undulatus]	6.46877e-66	sp|P52758|UK114_HUMAN	3e-71	Ribonuclease UK114 OS=Homo sapiens GN=HRSP12 PE=1 SV=1	KOG2317	8e-72	Putative translation initiation inhibitor UK114/IBM1		GO:0005730;GO:0004519;GO:0019239;GO:0006449;GO:0005739	nucleolus|endonuclease activity|deaminase activity|regulation of translational termination|mitochondrion
CL38929Contig1	296.339	105.654	487.024	4.60962	2.20465	0.00114104	0.10427	Up	gi|543724744|ref|XP_005503516.1|PREDICTED: leukocyte cell-derived chemotaxin-2 [Columba livia]	7.81038e-70	sp|O62644|LECT2_BOVIN	5e-66	Leukocyte cell-derived chemotaxin-2 OS=Bos taurus GN=LECT2 PE=1 SV=1	KOG4377	6e-07	Zn-finger protein		GO:0005576;GO:0006935	extracellular region|chemotaxis
CL3892Contig1	25.2047	7.70393	42.7055	5.54334	2.47076	0.023755	0.65864	Up
CL38941Contig1	6522.48	134.268	12910.7	96.1558	6.5873	4.58132e-27	2.30674e-22	Up	gi|6576738|dbj|BAA88337.1|ORF2 [Acanthochelys spixii]	6.17631e-68	sp|Q95SX7|RTBS_DROME	1e-11	Probable RNA-directed DNA polymerase from transposon BS OS=Drosophila melanogaster GN=RTase PE=2 SV=1	KOG1075	7e-27	FOG: Reverse transcriptase		GO:0003723;GO:0003964;GO:0006278	RNA binding|RNA-directed DNA polymerase activity|RNA-dependent DNA replication
CL38943Contig1	323.656	59.4303	587.882	9.89196	3.30626	2.58187e-06	0.00088435	Up
CL38951Contig1	88.5718	15.4079	161.736	10.497	3.3919	0.000128449	0.0214868	Up
CL38965Contig1	94.1961	33.0168	155.375	4.70594	2.23448	0.00634966	0.328246	Up	gi|483520597|gb|EOB05993.1|Macrophage mannose receptor 1-like protein 1, partial [Anas platyrhynchos]	9.15049e-179	sp|P22897|MRC1_HUMAN	4e-132	Macrophage mannose receptor 1 OS=Homo sapiens GN=MRC1 PE=1 SV=1	KOG4297	1e-132	C-type lectin		GO:0030246	carbohydrate binding
CL38981Contig1	35.1036	6.60337	63.6039	9.63205	3.26784	0.00189153	0.144523	Up
CL39000Contig1	4193.9	1673.95	6713.85	4.01077	2.00388	4.8768e-05	0.0103434	Up	gi|514719358|ref|XP_005013490.1|PREDICTED: MIT domain-containing protein 1, partial [Anas platyrhynchos]	2.32609e-103	sp|Q5I0J5|MITD1_RAT	4e-104	MIT domain-containing protein 1 OS=Rattus norvegicus GN=Mitd1 PE=2 SV=1	KOG4509	9e-103	Uncharacterized conserved protein		GO:0030496;GO:0019898;GO:0043231;GO:0000920;GO:0000281	midbody|extrinsic component of membrane|intracellular membrane-bounded organelle|cytokinetic cell separation|mitotic cytokinesis
CL39017Contig1	84.24	2.20112	166.279	75.5428	6.23922	4.92845e-08	3.14117e-05	Up	gi|543747783|ref|XP_005514645.1|PREDICTED: keratin, type II cytoskeletal 5-like [Columba livia]	2.62286e-47
CL39202Contig1	74.8719	19.8101	129.934	6.55897	2.71347	0.00190574	0.145075	Up
CL39214Contig1	188.974	93.5477	284.4	3.04017	1.60415	0.0253485	0.685457	Up
CL39215Contig1	1245.49	653.733	1837.24	2.81039	1.49077	0.00494168	0.277831	Up	gi|514747731|ref|XP_005019986.1|PREDICTED: protein NLRC5 [Anas platyrhynchos]	0	sp|Q86WI3|NLRC5_HUMAN	0	Protein NLRC5 OS=Homo sapiens GN=NLRC5 PE=1 SV=3	KOG4308	4e-86	LRR-containing protein		GO:0005829;GO:0045345;GO:0060335;GO:0000979;GO:0045944;GO:0043549;GO:0032088;GO:0045087;GO:0060339;GO:0060340;GO:0051607;GO:0005634	cytosol|positive regulation of MHC class I biosynthetic process|positive regulation of interferon-gamma-mediated signaling pathway|RNA polymerase II core promoter sequence-specific DNA binding|positive regulation of transcription from RNA polymerase II promoter|regulation of kinase activity|negative regulation of NF-kappaB transcription factor activity|innate immune response|negative regulation o…
CL39232Contig1	83.267	27.514	139.02	5.0527	2.33705	0.00542109	0.294742	Up
CL39247Contig1	123.253	48.4247	198.081	4.09049	2.03227	0.00900095	0.397564	Up	gi|529431078|ref|XP_005235343.1|PREDICTED: LOW QUALITY PROTEIN: leucine-rich repeat LGI family member 4-like [Falco peregrinus]	1.67189e-170	sp|Q8N135|LGI4_HUMAN	8e-96	Leucine-rich repeat LGI family member 4 OS=Homo sapiens GN=LGI4 PE=2 SV=1					GO:0005615;GO:0008344;GO:0042551;GO:0022011;GO:0014009	extracellular space|adult locomotory behavior|neuron maturation|myelination in peripheral nervous system|glial cell proliferation
CL39331Contig1	168.812	75.9387	261.685	3.446	1.78492	0.0151452	0.518761	Up	gi|514795623|ref|XP_005031201.1|PREDICTED: protein phosphatase 1K, mitochondrial-like isoform X1 [Anas platyrhynchos] >gi|514795627|ref|XP_005031202.1| PREDICTED: protein phosphatase 1K, mitochondrial-like isoform X2 [Anas platyrhynchos] >gi|483489295|gb|EOA93143.1| Protein phosphatase 1K, mitochondrial, partial [Anas platyrhynchos]	1.49917e-150	sp|Q5R522|PPM1K_PONAB	2e-136	Protein phosphatase 1K, mitochondrial OS=Pongo abelii GN=PPM1K PE=2 SV=1	KOG0698	2e-136	Serine/threonine protein phosphatase		GO:0046872;GO:0004722;GO:0006470;GO:0005739	metal ion binding|protein serine/threonine phosphatase activity|protein dephosphorylation|mitochondrion
CL39365Contig1	14.0837	0	28.1675	Inf	Inf	0.00127525	0.112649	Up
CL3938Contig1	29.268	2.20112	56.3349	25.5937	4.67772	0.000227349	0.0326133	Up
CL39403Contig1	36.1787	3.30168	69.0557	20.9153	4.38649	0.0001469	0.0236575	Up
CL3941Contig1	21.0199	6.60337	35.4365	5.36643	2.42396	0.0367581	0.804998	Up
CL39512Contig1	25.1087	6.60337	43.6141	6.60483	2.72352	0.0144584	0.50476	Up
CL39522Contig1	102.867	2.20112	203.533	92.4677	6.53088	6.35978e-09	5.42748e-06	Up	gi|483487794|gb|EOA93108.1|hypothetical protein Anapl_15237 [Anas platyrhynchos]	1.39575e-06
CL39547Contig1	471.415	180.492	762.339	4.22367	2.0785	0.000832033	0.0829578	Up	gi|514763339|ref|XP_005023712.1|PREDICTED: P2Y purinoceptor 14 [Anas platyrhynchos]	2.97809e-161	sp|Q9ESG6|P2Y14_MOUSE	2e-118	P2Y purinoceptor 14 OS=Mus musculus GN=P2ry14 PE=2 SV=1	KOG3656	9e-22	FOG: 7 transmembrane receptor	ko04080, Neuroactive ligand-receptor interaction;	GO:0045028;GO:0016021;GO:0035589	G-protein coupled purinergic nucleotide receptor activity|integral component of membrane|G-protein coupled purinergic nucleotide receptor signaling pathway
CL3960Contig1	13.9173	3.30168	24.5329	7.43044	2.89345	0.0420163	0.854721	Up
CL39630Contig1	11.8122	0	23.6243	Inf	Inf	0.00328143	0.208879	Up
CL39654Contig1	23.3875	7.70393	39.071	5.07157	2.34243	0.0350725	0.798886	Up
CL39684Contig1	17.0975	3.30168	30.8933	9.35685	3.22602	0.0160737	0.537932	Up
CL3969Contig1	71.7622	15.4079	128.116	8.31501	3.05572	0.00068163	0.0728678	Up
CL39764Contig1	23.17	0	46.34	Inf	Inf	5.13281e-05	0.0106355	Up
CL39785Contig1	113.898	29.7151	198.081	6.66599	2.73682	0.000786379	0.0799899	Up	gi|514719323|ref|XP_005013481.1|PREDICTED: interleukin-1 receptor-like 1 isoform X6 [Anas platyrhynchos]	0	sp|P14719|ILRL1_MOUSE	7e-78	Interleukin-1 receptor-like 1 OS=Mus musculus GN=Il1rl1 PE=2 SV=2	KOG4475	7e-08	FOG: Immunoglobin and related proteins		GO:0007165;GO:0004908	signal transduction|interleukin-1 receptor activity
CL39791Contig1	17.2639	0	34.5278	Inf	Inf	0.000378551	0.0471793	Up
CL39802Contig1	24.7504	7.70393	41.7969	5.4254	2.43973	0.026163	0.698669	Up
CL39821Contig1	12.0041	2.20112	21.8071	9.90725	3.30848	0.0366533	0.804503	Up
CL39828Contig1	34.9117	4.40224	65.4212	14.8609	3.89345	0.000466772	0.0550408	Up
CL3985Contig1	25.3007	8.80449	41.7969	4.74722	2.24708	0.0368013	0.805295	Up
CL39879Contig1	25.4416	0	50.8831	Inf	Inf	2.58101e-05	0.0059071	Up
CL3987Contig1	2437.62	1440.63	3434.61	2.3841	1.25344	0.0111847	0.443242	Up	gi|514762613|ref|XP_005023533.1|PREDICTED: peptidyl-prolyl cis-trans isomerase FKBP5 isoform X1 [Anas platyrhynchos]	0	sp|Q13451|FKBP5_HUMAN	0	Peptidyl-prolyl cis-trans isomerase FKBP5 OS=Homo sapiens GN=FKBP5 PE=1 SV=2	KOG0543	0	FKBP-type peptidyl-prolyl cis-trans isomerase	ko04915, Estrogen signaling pathway;	GO:0005528;GO:0031072;GO:0000413;GO:0016020;GO:0005634;GO:0061077;GO:0003755	FK506 binding|heat shock protein binding|protein peptidyl-prolyl isomerization|membrane|nucleus|chaperone-mediated protein folding|peptidyl-prolyl cis-trans isomerase activity
CL39905Contig1	54.3063	13.2067	95.4059	7.22404	2.85281	0.00217677	0.160004	Up
CL3990Contig1	41.7969	0	83.5937	Inf	Inf	5.39756e-07	0.00022838	Up
CL39935Contig1	2076.74	1308.57	2844.91	2.17407	1.1204	0.0246733	0.669356	Up	gi|483508489|gb|EOA98550.1|Eukaryotic translation initiation factor 2-alpha kinase 3, partial [Anas platyrhynchos]	0	sp|Q9NZJ5|E2AK3_HUMAN	0	Eukaryotic translation initiation factor 2-alpha kinase 3 OS=Homo sapiens GN=EIF2AK3 PE=1 SV=3	KOG1033	0	eIF-2alpha kinase PEK/EIF2AK3	ko04141, Protein processing in endoplasmic reticulum;ko04932, Non-alcoholic fatty liver disease (NAFLD);ko05160, Hepatitis C;ko05162, Measles;ko05164, Influenza A;ko05168, Herpes simplex infection;ko05169, Epstein-Barr virus infection;ko05010, Alzheimer's disease;	GO:0032092;GO:0030282;GO:0002063;GO:0007029;GO:0009967;GO:0004694;GO:0030968;GO:0030073;GO:0051260;GO:0017148;GO:0006983;GO:0045444;GO:0006919;GO:0031018;GO:0042802;GO:0019217;GO:0005524;GO:0048009;GO:0046777;GO:0032933;GO:0019903;GO:0019722;GO:0006412;GO:0031642;GO:0007595;GO:0005789	positive regulation of protein binding|bone mineralization|chondrocyte development|endoplasmic reticulum organization|positive regulation of signal transduction|eukaryotic translation initiation factor 2alpha kinase activity|endoplasmic reticulum unfolded protein response|insulin secretion|protein homooligomerization|negative regulation of translation|ER overload response|fat cell differentiation…
CL3997Contig1	61.6458	8.80449	114.487	13.0033	3.7008	0.000132616	0.0221105	Up
CL4019Contig1	27.2588	0	54.5177	Inf	Inf	1.53413e-05	0.00392107	Up
CL40228Contig1	14.8259	3.30168	26.3502	7.98084	2.99654	0.0317853	0.760062	Up
CL4027Contig1	14.3716	3.30168	25.4416	7.70564	2.94591	0.0365248	0.804503	Up
CL40315Contig1	17.6478	4.40224	30.8933	7.01763	2.81098	0.0277375	0.71455	Up
CL40320Contig1	25.4671	5.5028	45.4314	8.25604	3.04545	0.00736368	0.353084	Up
CL40332Contig1	44.145	16.5084	71.7816	4.34818	2.12041	0.0219141	0.642775	Up	gi|493107076|ref|WP_006139487.1|translation initiation factor IF-2 [Streptomyces griseoaurantiacus] >gi|329303884|gb|EGG47767.1| translation initiation factor IF-2 [Streptomyces griseoaurantiacus M045]	3.55013e-08	sp|Q8CJQ8|IF2_STRCO	3e-07	Translation initiation factor IF-2 OS=Streptomyces coelicolor (strain ATCC BAA-471 / A3(2) / M145) GN=infB PE=3 SV=1	KOG0115	3e-06	RNA-binding protein p54nrb (RRM superfamily)
CL40346Contig1	15.901	0	31.802	Inf	Inf	0.000629023	0.0691796	Up
CL40349Contig1	14.9924	0	29.9847	Inf	Inf	0.000891641	0.0870059	Up	gi|557265493|ref|XP_006018183.1|PREDICTED: uncharacterized protein F54H12.2-like [Alligator sinensis]	2.47905e-19
CL40395Contig1	422.304	190.397	654.212	3.43604	1.78075	0.00448813	0.260949	Up	gi|326918352|ref|XP_003205453.1|PREDICTED: short coiled-coil protein-like [Meleagris gallopavo]	2.78664e-09
CL40411Contig1	329.734	155.179	504.288	3.24972	1.70031	0.00916931	0.397661	Up
CL4041Contig1	14.8259	3.30168	26.3502	7.98084	2.99654	0.0317853	0.760062	Up
CL40478Contig1	27.7131	0	55.4263	Inf	Inf	1.35241e-05	0.00358395	Up
CL40496Contig1	72.0756	24.2123	119.939	4.95362	2.30848	0.0072713	0.353054	Up
CL40507Contig1	27.9306	7.70393	48.1573	6.251	2.64409	0.0134825	0.491925	Up
CL40525Contig1	25.5631	6.60337	44.5228	6.74243	2.75327	0.0130781	0.48171	Up
CL40534Contig1	18.1021	4.40224	31.802	7.22404	2.85281	0.0244981	0.666399	Up
CL40545Contig1	18.0061	3.30168	32.7106	9.90725	3.30848	0.0123169	0.463503	Up	gi|483517605|gb|EOB04076.1|hypothetical protein Anapl_04629 [Anas platyrhynchos]	3.86691e-09
CL4054Contig1	20.2777	3.30168	37.2537	11.2833	3.49611	0.00644409	0.329146	Up
CL40579Contig1	22.7157	0	45.4314	Inf	Inf	5.91981e-05	0.0116853	Up
CL40598Contig1	294.63	148.576	440.684	2.96606	1.56855	0.0180057	0.579459	Up
CL40604Contig1	38.4758	8.80449	68.1471	7.74004	2.95234	0.00326114	0.208879	Up
CL40637Contig1	13.463	3.30168	23.6243	7.15524	2.839	0.0483853	0.9183	Up	gi|514770455|ref|XP_005025398.1|PREDICTED: glutamate receptor ionotropic, kainate 3-like [Anas platyrhynchos]	0	sp|B1AS29|GRIK3_MOUSE	0	Glutamate receptor ionotropic, kainate 3 OS=Mus musculus GN=Grik3 PE=2 SV=1	KOG1052	0	Glutamate-gated kainate-type ion channel receptor subunit GluR5 and related subunits	ko04080, Neuroactive ligand-receptor interaction;ko04724, Glutamatergic synapse;	GO:0005887;GO:0015277;GO:0007196;GO:0045211;GO:0001640;GO:0030054;GO:0005234;GO:0006811;GO:0035235	integral component of plasma membrane|kainate selective glutamate receptor activity|adenylate cyclase-inhibiting G-protein coupled glutamate receptor signaling pathway|postsynaptic membrane|adenylate cyclase inhibiting G-protein coupled glutamate receptor activity|cell junction|extracellular-glutamate-gated ion channel activity|ion transport|ionotropic glutamate receptor signaling pathway
CL40659Contig1	1885.42	239.922	3530.93	14.717	3.87941	4.11123e-12	6.90015e-09	Up
CL40667Contig1	25.3711	4.40224	46.34	10.5265	3.39595	0.00377261	0.230718	Up
CL40725Contig1	17.0975	3.30168	30.8933	9.35685	3.22602	0.0160737	0.537932	Up
CL40737Contig1	22.3829	6.60337	38.1624	5.77923	2.53088	0.0267789	0.70668	Up
CL40776Contig1	19.7274	2.20112	37.2537	16.9249	4.08107	0.00300097	0.196236	Up
CL40811Contig1	14.8259	3.30168	26.3502	7.98084	2.99654	0.0317853	0.760062	Up	gi|483524751|gb|EOB08612.1|Transcription elongation regulator 1-like protein, partial [Anas platyrhynchos]	1.03077e-62	sp|Q5VWI1|TCRGL_HUMAN	5e-62	Transcription elongation regulator 1-like protein OS=Homo sapiens GN=TCERG1L PE=2 SV=2	KOG0155	1e-66	Transcription factor CA150
CL40878Contig1	615.309	330.168	900.45	2.72725	1.44744	0.0132259	0.485378	Up
CL40909Contig1	27.7131	0	55.4263	Inf	Inf	1.35241e-05	0.00358395	Up
CL40941Contig1	17.0975	3.30168	30.8933	9.35685	3.22602	0.0160737	0.537932	Up
CL40953Contig1	13.463	3.30168	23.6243	7.15524	2.839	0.0483853	0.9183	Up
CL40997Contig1	2322.27	1487.96	3156.57	2.12141	1.08502	0.0280673	0.71455	Up	gi|513179372|ref|XP_004935904.1|PREDICTED: nuclear GTPase SLIP-GC isoform X1 [Gallus gallus] >gi|513179375|ref|XP_004935905.1| PREDICTED: nuclear GTPase SLIP-GC isoform X2 [Gallus gallus]	0	sp|Q68CJ6|SLIP_HUMAN	3e-159	Nuclear GTPase SLIP-GC OS=Homo sapiens GN=NUGGC PE=2 SV=3					GO:0005730;GO:0006184;GO:0003924;GO:0005525	nucleolus|GTP catabolic process|GTPase activity|GTP binding
CL41022Contig1	24.2961	7.70393	40.8882	5.30745	2.40802	0.0288317	0.722571	Up
CL41027Contig1	27.2588	0	54.5177	Inf	Inf	1.53413e-05	0.00392107	Up
CL41067Contig1	9.54059	0	19.0812	Inf	Inf	0.00915128	0.397564	Up
CL41083Contig1	768.067	373.09	1163.04	3.11733	1.64031	0.00389537	0.236024	Up	gi|513232991|ref|XP_003643147.2|PREDICTED: adenylate cyclase type 10-like isoform X1 [Gallus gallus]	0	sp|Q866F4|ADCYA_RABIT	4e-102	Adenylate cyclase type 10 OS=Oryctolagus cuniculus GN=ADCY10 PE=2 SV=1	KOG1221	6e-24	Acyl-CoA reductase		GO:0035556;GO:0016849;GO:0009190	intracellular signal transduction|phosphorus-oxygen lyase activity|cyclic nucleotide biosynthetic process
CL41095Contig1	31.5651	7.70393	55.4263	7.19455	2.8469	0.00657363	0.329735	Up	gi|483517911|gb|EOB04297.1|hypothetical protein Anapl_04707 [Anas platyrhynchos]	5.82245e-17
CL41100Contig1	9.08628	0	18.1726	Inf	Inf	0.0113559	0.443242	Up
CL41185Contig1	14.3716	3.30168	25.4416	7.70564	2.94591	0.0365248	0.804503	Up
CL41206Contig1	13.1751	0	26.3502	Inf	Inf	0.00184436	0.142213	Up
CL41209Contig1	11.5498	2.20112	20.8984	9.49445	3.24708	0.0430018	0.863938	Up
CL41231Contig1	15.4467	0	30.8933	Inf	Inf	0.000748123	0.0771901	Up
CL41244Contig1	723.11	279.542	1166.68	4.17353	2.06127	0.000392836	0.0487185	Up
CL41341Contig1	187.829	101.252	274.406	2.71014	1.43836	0.0441333	0.877526	Up	gi|527264762|ref|XP_005150603.1|PREDICTED: overexpressed in colon carcinoma 1 protein homolog [Melopsittacus undulatus]	3.96488e-12	sp|P0C915|OCC1_CHICK	6e-17	Overexpressed in colon carcinoma 1 protein homolog OS=Gallus gallus PE=3 SV=1
CL41349Contig1	62.5605	29.7151	95.4059	3.21068	1.68288	0.049197	0.924655	Up
CL41396Contig1	23.0036	3.30168	42.7055	12.9345	3.69315	0.00306756	0.199554	Up
CL41456Contig1	48.3492	2.20112	94.4973	42.9314	5.42396	5.60057e-06	0.00176247	Up
CL41501Contig1	20.4696	5.5028	35.4365	6.43971	2.687	0.0244152	0.665612	Up
CL41592Contig1	16.8096	0	33.6192	Inf	Inf	0.000447457	0.0530115	Up
CL41609Contig1	190.734	61.6314	319.837	5.18951	2.3756	0.00128955	0.113316	Up
CL41656Contig1	20.924	5.5028	36.3451	6.60483	2.72352	0.021812	0.641504	Up
CL41709Contig1	53.8775	18.7095	89.0455	4.75936	2.25077	0.0122921	0.46335	Up
CL41902Contig1	27.2588	0	54.5177	Inf	Inf	1.53413e-05	0.00392107	Up
CL41917Contig1	36.684	14.3073	59.0608	4.12802	2.04545	0.032839	0.772652	Up
CL41929Contig1	28.6728	11.0056	46.34	4.21058	2.07402	0.0430331	0.863938	Up
CL41935Contig1	17.6478	4.40224	30.8933	7.01763	2.81098	0.0277375	0.71455	Up
CL41939Contig1	28.1225	9.90505	46.34	4.67842	2.22602	0.032265	0.765805	Up
CL41940Contig1	15.2803	3.30168	27.2588	8.25604	3.04545	0.0276849	0.71455	Up
CL42019Contig1	18.1726	0	36.3451	Inf	Inf	0.000272578	0.0366967	Up
CL42039Contig1	19.9898	0	39.9796	Inf	Inf	0.00014469	0.0234254	Up
CL42255Contig1	38.8341	7.70393	69.9643	9.08164	3.18295	0.00178816	0.140461	Up
CL42256Contig1	883.051	519.465	1246.64	2.39985	1.26294	0.0220098	0.642775	Up
CL4229Contig1	28.7433	6.60337	50.8831	7.70564	2.94591	0.00661309	0.330333	Up
CL42300Contig1	9.54059	0	19.0812	Inf	Inf	0.00915128	0.397564	Up
CL42390Contig1	17.9102	2.20112	33.6192	15.2737	3.93298	0.00522954	0.286886	Up
CL42411Contig1	17.0015	2.20112	31.802	14.4481	3.85281	0.00695631	0.342048	Up
CL42446Contig1	13.1751	0	26.3502	Inf	Inf	0.00184436	0.142213	Up
CL42558Contig1	1039.54	641.627	1437.45	2.24032	1.1637	0.0306109	0.751436	Up	gi|514762189|ref|XP_005023430.1|PREDICTED: E3 ubiquitin-protein ligase NEDD4-like isoform X2 [Anas platyrhynchos]	7.95096e-69	sp|Q5RBF2|NED4L_PONAB	1e-70	E3 ubiquitin-protein ligase NEDD4-like OS=Pongo abelii GN=NEDD4L PE=2 SV=1	KOG0940	6e-72	Ubiquitin protein ligase RSP5/NEDD4	ko04144, Endocytosis;ko04120, Ubiquitin mediated proteolysis;ko04960, Aldosterone-regulated sodium reabsorption;	GO:0004842	ubiquitin-protein transferase activity
CL4257Contig1	13.2711	1.10056	25.4416	23.1169	4.53088	0.00840489	0.383878	Up
CL42591Contig1	14.0837	0	28.1675	Inf	Inf	0.00127525	0.112649	Up	gi|45382519|ref|NP_990250.1|microtubule-associated protein 6 homolog [Gallus gallus] >gi|82070362|sp|O73737.1|MAP6_CHICK RecName: Full=Microtubule-associated protein 6 homolog; Short=MAP-6 homolog; AltName: Full=Stable tubule-only polypeptide homolog; Short=STOP >gi|3002801|gb|AAC79958.1| putative microtubule associated protein [Gallus gallus]	6.86753e-53	sp|O73737|MAP6_CHICK	2e-67	Microtubule-associated protein 6 homolog OS=Gallus gallus GN=MAP6 PE=2 SV=1					GO:0008017;GO:0007026;GO:0005794;GO:0005516;GO:0048471;GO:0005874	microtubule binding|negative regulation of microtubule depolymerization|Golgi apparatus|calmodulin binding|perinuclear region of cytoplasm|microtubule
CL42614Contig1	273.431	103.453	443.41	4.28611	2.09967	0.00216548	0.15976	Up
CL42616Contig1	6.81471	0	13.6294	Inf	Inf	0.0356133	0.798886	Up
CL42634Contig1	206.29	26.4135	386.167	14.6201	3.86988	9.98158e-07	0.000383651	Up	gi|449280785|gb|EMC88011.1|Putative uncharacterized transposon-derived protein ZK1236.4, partial [Columba livia]	1.46944e-08
CL42635Contig1	257.877	60.5309	455.222	7.5205	2.91083	5.06214e-05	0.0105761	Up
CL42730Contig1	7.26902	0	14.538	Inf	Inf	0.0280724	0.71455	Up
CL42793Contig1	24.5329	0	49.0659	Inf	Inf	3.38073e-05	0.007532	Up
CL42809Contig1	919.709	528.269	1311.15	2.48197	1.31149	0.0169012	0.555839	Up	gi|514734377|ref|XP_005017062.1|PREDICTED: alpha-ketoglutarate-dependent dioxygenase FTO [Anas platyrhynchos]	0	sp|Q5R7X0|FTO_PONAB	0	Alpha-ketoglutarate-dependent dioxygenase FTO OS=Pongo abelii GN=FTO PE=2 SV=1					GO:0035553;GO:0008198;GO:0001659;GO:0010883;GO:0035552;GO:0006307;GO:0035515;GO:0043734;GO:0044065;GO:0042245;GO:0035516;GO:0060612;GO:0070350;GO:0040014;GO:0005634	oxidative single-stranded RNA demethylation|ferrous iron binding|temperature homeostasis|regulation of lipid storage|oxidative single-stranded DNA demethylation|DNA dealkylation involved in DNA repair|oxidative RNA demethylase activity|DNA-N1-methyladenine dioxygenase activity|regulation of respiratory system process|RNA repair|oxidative DNA demethylase activity|adipose tissue development|regulat…
CL42816Contig1	14.2757	2.20112	26.3502	11.9713	3.5815	0.016864	0.554981	Up
CL42838Contig1	9.54059	0	19.0812	Inf	Inf	0.00915128	0.397564	Up
CL42924Contig1	12.3624	1.10056	23.6243	21.4657	4.42396	0.0118478	0.452616	Up
CL42985Contig1	49.5263	20.9107	78.142	3.73694	1.90186	0.03391	0.786377	Up
CL43031Contig1	32.2114	9.90505	54.5177	5.50403	2.46049	0.0152724	0.522405	Up
CL43045Contig1	9.08628	0	18.1726	Inf	Inf	0.0113559	0.443242	Up
CL43100Contig1	14.3716	3.30168	25.4416	7.70564	2.94591	0.0365248	0.804503	Up
CL43126Contig1	100.678	39.6202	161.736	4.08215	2.02933	0.0114452	0.444714	Up	gi|557285353|ref|XP_006025479.1|PREDICTED: histone-arginine methyltransferase CARM1-like [Alligator sinensis]	0	sp|Q6DC04|CARM1_DANRE	0	Histone-arginine methyltransferase CARM1 OS=Danio rerio GN=carm1 PE=2 SV=1	KOG1500	0	Protein arginine N-methyltransferase CARM1		GO:0006479;GO:0008168	protein methylation|methyltransferase activity
CL43171Contig1	23.4579	3.30168	43.6141	13.2097	3.72352	0.00272096	0.184889	Up
CL43180Contig1	214.351	118.861	309.842	2.60677	1.38226	0.0476201	0.909951	Up	gi|326923286|ref|XP_003207869.1|PREDICTED: hypothetical protein LOC100543876 [Meleagris gallopavo]	1.08175e-22
CL43211Contig1	38.5717	9.90505	67.2384	6.7883	2.76305	0.00522997	0.286886	Up	gi|513218643|ref|XP_001235196.3|PREDICTED: uncharacterized gene 48 protein-like [Gallus gallus]	4.94937e-12	sp|P24639|ANXA7_DICDI	3e-06	Annexin A7 OS=Dictyostelium discoideum GN=nxnA PE=1 SV=1
CL4321Contig1	29.1976	6.60337	51.7918	7.84324	2.97145	0.00601728	0.315164	Up
CL43307Contig1	14.73	2.20112	27.2588	12.3841	3.63041	0.0145054	0.505091	Up
CL43322Contig1	775.733	341.174	1210.29	3.54743	1.82678	0.00137278	0.117954	Up	gi|514740896|ref|XP_005018370.1|PREDICTED: zinc finger protein RFP-like [Anas platyrhynchos] >gi|483514576|gb|EOB02164.1| Zinc finger protein RFP [Anas platyrhynchos]	3.71329e-143	sp|Q1XHU0|TRI39_PANTR	2e-54	E3 ubiquitin-protein ligase TRIM39 OS=Pan troglodytes GN=TRIM39 PE=3 SV=1	KOG2177	3e-56	Predicted E3 ubiquitin ligase
CL43380Contig1	33.4783	8.80449	58.1522	6.60483	2.72352	0.00768468	0.363316	Up	gi|514751138|ref|XP_005020788.1|PREDICTED: protein delta homolog 1 [Anas platyrhynchos]	0	sp|P80370|DLK1_HUMAN	6e-133	Protein delta homolog 1 OS=Homo sapiens GN=DLK1 PE=1 SV=3	KOG1217	2e-133	Fibrillins and related proteins containing Ca2+-binding EGF-like domains		GO:0048706;GO:0009897;GO:0009791;GO:0005509;GO:0045746	embryonic skeletal system development|external side of plasma membrane|post-embryonic development|calcium ion binding|negative regulation of Notch signaling pathway
CL43420Contig1	24.0786	0	48.1573	Inf	Inf	3.87896e-05	0.00849172	Up
CL43433Contig1	36.3257	15.4079	57.2435	3.71522	1.89345	0.0471164	0.903755	Up
CL43516Contig1	56.6228	3.30168	109.944	33.2994	5.05742	5.34523e-06	0.0017034	Up	gi|498998437|ref|XP_004533848.1|PREDICTED: keratin-associated protein 16-1-like [Ceratitis capitata]	1.48285e-17	sp|Q01643|MS84B_DROME	1e-17	Male-specific sperm protein Mst84Db OS=Drosophila melanogaster GN=Mst84Db PE=2 SV=2	KOG4726	1e-07	Ultrahigh sulfur keratin-associated protein		GO:0001558;GO:0005520;GO:0007275;GO:0005576;GO:0001520;GO:0007288	regulation of cell growth|insulin-like growth factor binding|multicellular organismal development|extracellular region|outer dense fiber|sperm axoneme assembly
CL43599Contig1	276.567	113.358	439.776	3.87954	1.95588	0.0039978	0.238728	Up	gi|483511879|gb|EOB00556.1|hypothetical protein Anapl_11705 [Anas platyrhynchos]	5.22015e-13
CL43602Contig1	25.7295	3.30168	48.1573	14.5857	3.86648	0.0015189	0.125993	Up
CL43618Contig1	32.4033	12.1062	52.7004	4.35319	2.12207	0.0325467	0.767929	Up
CL43668Contig1	13.9173	3.30168	24.5329	7.43044	2.89345	0.0420163	0.854721	Up
CL43688Contig1	86.633	8.80449	164.462	18.6793	4.22337	8.12761e-06	0.00240725	Up
CL43705Contig1	24.5329	0	49.0659	Inf	Inf	3.38073e-05	0.007532	Up
CL4372Contig1	59.3548	24.2123	94.4973	3.90286	1.96453	0.0243685	0.665612	Up
CL43755Contig1	535.12	280.643	789.597	2.81353	1.49238	0.0125412	0.467731	Up	gi|45382457|ref|NP_990225.1|multidrug resistance protein 1 [Gallus gallus] >gi|3355757|emb|CAA08835.1| ABC transporter protein [Gallus gallus]	0	sp|P08183|MDR1_HUMAN	0	Multidrug resistance protein 1 OS=Homo sapiens GN=ABCB1 PE=1 SV=3	KOG0055	0	Multidrug/pheromone exporter, ABC superfamily	ko02010, ABC transporters;ko05206, MicroRNAs in cancer;ko04976, Bile secretion;	GO:0055085;GO:0016021;GO:0042626;GO:0006200;GO:0005524	transmembrane transport|integral component of membrane|ATPase activity, coupled to transmembrane movement of substances|ATP catabolic process|ATP binding
CL43812Contig1	78.3339	2.20112	154.467	70.1763	6.13291	1.00273e-07	5.67285e-05	Up	gi|514708965|ref|XP_005011016.1|PREDICTED: uncharacterized protein LOC101799466 [Anas platyrhynchos]	4.07813e-88
CL43817Contig1	81.1363	18.7095	143.563	7.67326	2.93984	0.000766658	0.0786192	Up
CL43883Contig1	15.4467	0	30.8933	Inf	Inf	0.000748123	0.0771901	Up	gi|2331058|gb|AAC60280.1|unknown [Gallus gallus]	3.66499e-20
CL43947Contig1	24.0786	0	48.1573	Inf	Inf	3.87896e-05	0.00849172	Up
CL43984Contig1	9.54059	0	19.0812	Inf	Inf	0.00915128	0.397564	Up
CL439Contig1	309.388	0	618.775	Inf	Inf	1.46261e-17	8.18266e-14	Up	gi|483517667|gb|EOB04112.1|hypothetical protein Anapl_00137 [Anas platyrhynchos]	5.47544e-27
CL44002Contig1	54.972	0	109.944	Inf	Inf	6.01015e-08	3.69045e-05	Up
CL44012Contig1	1384.89	559.085	2210.69	3.95412	1.98336	0.000192332	0.0289844	Up	gi|514707827|ref|XP_005010746.1|PREDICTED: schlafen family member 5-like [Anas platyrhynchos]	0	sp|Q68D06|SLN13_HUMAN	2e-120	Schlafen family member 13 OS=Homo sapiens GN=SLFN13 PE=2 SV=1					GO:0005524	ATP binding
CL4413Contig1	566.864	326.867	806.861	2.46847	1.30362	0.0270023	0.709908	Up	gi|514758049|ref|XP_005022459.1|PREDICTED: arginase-2, mitochondrial [Anas platyrhynchos]	4.72288e-140	sp|P78540|ARGI2_HUMAN	5e-122	Arginase-2, mitochondrial OS=Homo sapiens GN=ARG2 PE=1 SV=1	KOG2965	1e-122	Arginase	ko05146, Amoebiasis;ko00330, Arginine and proline metabolism;ko01230, Biosynthesis of amino acids;	GO:0006525;GO:0001657;GO:0046872;GO:0006941;GO:0004053;GO:0005739	arginine metabolic process|ureteric bud development|metal ion binding|striated muscle contraction|arginase activity|mitochondrion
CL4422Contig1	33.2159	11.0056	55.4263	5.03618	2.33233	0.0194457	0.604212	Up
CL44236Contig1	34.8413	8.80449	60.878	6.91443	2.78961	0.00603474	0.315203	Up	gi|483513922|gb|EOB01794.1|hypothetical protein Anapl_01525 [Anas platyrhynchos]	1.75836e-12
CL44243Contig1	42.2512	0	84.5024	Inf	Inf	4.9562e-07	0.000217	Up
CL44267Contig1	386.621	0	773.242	Inf	Inf	1.50866e-19	1.12797e-15	Up	gi|514756423|ref|XP_005022074.1|PREDICTED: uncharacterized protein LOC101791992 [Anas platyrhynchos]	3.27432e-11
CL4429Contig1	31.1108	7.70393	54.5177	7.07661	2.82306	0.00717396	0.349339	Up
CL44313Contig1	11.8122	0	23.6243	Inf	Inf	0.00328143	0.208879	Up	gi|332129|gb|AAA46542.1|Pr160 gag pro pol precursor [Mus musculus]	2.94161e-39	sp|P03364|POL_SMRVH	1e-56	Pol polyprotein OS=Squirrel monkey retrovirus GN=pol PE=3 SV=2	KOG0017	2e-13	FOG: Transposon-encoded proteins with TYA, reverse transcriptase, integrase domains in various combinations		GO:0019028;GO:0003723;GO:0006310;GO:0008270;GO:0006278;GO:0005730;GO:0003887;GO:0003964;GO:0004523;GO:0003677;GO:0006508;GO:0046080;GO:0019031;GO:0004190;GO:0016032;GO:0005198;GO:0005737;GO:0015074;GO:0005886;GO:0051028	viral capsid|RNA binding|DNA recombination|zinc ion binding|RNA-dependent DNA replication|nucleolus|DNA-directed DNA polymerase activity|RNA-directed DNA polymerase activity|RNA-DNA hybrid ribonuclease activity|DNA binding|proteolysis|dUTP metabolic process|viral envelope|aspartic-type endopeptidase activity|viral process|structural molecule activity|cytoplasm|DNA integration|plasma membrane|mRNA…
CL44321Contig1	46.1542	18.7095	73.5988	3.93376	1.97591	0.0300907	0.744886	Up
CL44338Contig1	12.4584	2.20112	22.7157	10.3201	3.36738	0.0312875	0.758477	Up
CL44416Contig1	9.08628	0	18.1726	Inf	Inf	0.0113559	0.443242	Up
CL44439Contig1	59.2588	23.1118	95.4059	4.12802	2.04545	0.0195572	0.604302	Up	gi|543278924|ref|XP_005427488.1|PREDICTED: adaptin ear-binding coat-associated protein 1 [Geospiza fortis]	4.6106e-12
CL4446Contig1	22.4788	7.70393	37.2537	4.83568	2.27372	0.042755	0.863744	Up
CL44504Contig1	45.4569	5.5028	85.411	15.5214	3.95618	0.000164716	0.0261627	Up
CL44507Contig1	58.2737	6.60337	109.944	16.6497	4.05742	5.67177e-05	0.0113431	Up
CL44520Contig1	64.4482	25.3129	103.584	4.09212	2.03285	0.018626	0.590577	Up
CL44683Contig1	15.8305	4.40224	27.2588	6.19203	2.63041	0.0459076	0.889037	Up
CL44694Contig1	14.2757	2.20112	26.3502	11.9713	3.5815	0.016864	0.554981	Up
CL44769Contig1	13.7254	1.10056	26.3502	23.9425	4.5815	0.00710219	0.347187	Up
CL44794Contig1	19.0107	4.40224	33.6192	7.63684	2.93298	0.0191546	0.602783	Up
CL44800Contig1	26.1838	3.30168	49.0659	14.8609	3.89345	0.0013562	0.116928	Up
CL44814Contig1	455.779	22.0112	889.546	40.4133	5.33676	9.74352e-13	2.22998e-09	Up	gi|514705787|ref|XP_005009988.1|PREDICTED: ubl carboxyl-terminal hydrolase 18 isoform X1 [Anas platyrhynchos] >gi|514705789|ref|XP_005009989.1| PREDICTED: ubl carboxyl-terminal hydrolase 18 isoform X2 [Anas platyrhynchos]	1.05315e-69	sp|Q3LFD5|UBP41_HUMAN	1e-40	Putative ubiquitin carboxyl-terminal hydrolase 41 OS=Homo sapiens GN=USP41 PE=2 SV=2	KOG1863	5e-42	Ubiquitin carboxyl-terminal hydrolase		GO:0032020;GO:0006511;GO:0035634;GO:0004221;GO:0019785	ISG15-protein conjugation|ubiquitin-dependent protein catabolic process|response to stilbenoid|ubiquitin thiolesterase activity|ISG15-specific protease activity
CL44853Contig1	430.955	253.129	608.78	2.40502	1.26605	0.0396481	0.838884	Up	gi|514774291|ref|XP_005026317.1|PREDICTED: serine-rich coiled-coil domain-containing protein 2 isoform X2 [Anas platyrhynchos]	0	sp|Q9H7U1|CCSE2_HUMAN	0	Serine-rich coiled-coil domain-containing protein 2 OS=Homo sapiens GN=CCSER2 PE=2 SV=2					GO:0015630;GO:0001578;GO:0008017	microtubule cytoskeleton|microtubule bundle formation|microtubule binding
CL44856Contig1	29.5814	11.0056	48.1573	4.3757	2.12951	0.036575	0.804503	Up
CL44888Contig1	26.0878	2.20112	49.9745	22.7041	4.50488	0.000505176	0.0588827	Up
CL44965Contig1	9.63656	1.10056	18.1726	16.5121	4.04545	0.0349682	0.798886	Up
CL4496Contig1	224.935	89.1454	360.725	4.04648	2.01667	0.00432071	0.253557	Up	gi|514716150|ref|XP_005012719.1|PREDICTED: killer cell lectin-like receptor subfamily F member 1-like [Anas platyrhynchos]	1.44782e-86	sp|Q8MI05|KLRF1_MACFA	1e-08	Killer cell lectin-like receptor subfamily F member 1 OS=Macaca fascicularis GN=KLRF1 PE=2 SV=1	KOG4297	1e-08	C-type lectin
CL44991Contig1	237.425	117.76	357.091	3.03236	1.60044	0.0203381	0.621762	Up	gi|514764638|ref|XP_005024024.1|PREDICTED: uncharacterized protein LOC101792527 isoform X2 [Anas platyrhynchos]	1.55321e-143	sp|Q9Y603|ETV7_HUMAN	4e-110	Transcription factor ETV7 OS=Homo sapiens GN=ETV7 PE=1 SV=1	KOG3804	1e-110	Transcription factor NERF and related proteins, contain ETS domain	ko04013, MAPK signaling pathway - fly;ko05202, Transcriptional misregulation in cancers;ko04320, Dorso-ventral axis formation;	GO:0006355;GO:0003700;GO:0043565;GO:0005634	regulation of transcription, DNA-templated|sequence-specific DNA binding transcription factor activity|sequence-specific DNA binding|nucleus
CL45073Contig1	25.659	7.70393	43.6141	5.66129	2.50113	0.0215816	0.641504	Up
CL45085Contig1	41.7775	15.4079	68.1471	4.42288	2.14499	0.0219996	0.642775	Up
CL45092Contig1	88.1369	0	176.274	Inf	Inf	7.57037e-10	7.94116e-07	Up	gi|514781093|ref|XP_005027772.1|PREDICTED: interferon alpha-inducible protein 27-like protein 2B-like [Anas platyrhynchos]	4.4958e-34	sp|Q6IED8|IFI6_BOVIN	2e-06	Interferon alpha-inducible protein 6 OS=Bos taurus GN=IFI6 PE=2 SV=1					GO:0016021	integral component of membrane
CL4521Contig1	38.5973	15.4079	61.7867	4.01008	2.00363	0.0340887	0.7877	Up
CL45286Contig1	35.2251	13.2067	57.2435	4.33442	2.11584	0.0293887	0.73074	Up
CL45303Contig1	52.3482	22.0112	82.6851	3.7565	1.90939	0.0316328	0.760062	Up
CL45312Contig1	585.34	137.57	1033.11	7.50969	2.90875	2.97982e-06	0.00100696	Up	gi|363734341|ref|XP_003641380.1|PREDICTED: ubiquitin-conjugating enzyme E2 L3-like isoform X1 [Gallus gallus]	5.85915e-53	sp|P68037|UB2L3_MOUSE	3e-34	Ubiquitin-conjugating enzyme E2 L3 OS=Mus musculus GN=Ube2l3 PE=2 SV=1	KOG0422	6e-35	Ubiquitin-protein ligase	ko04120, Ubiquitin mediated proteolysis;ko05012, Parkinson's disease;	GO:0016881	acid-amino acid ligase activity
CL45321Contig1	25.851	9.90505	41.7969	4.21975	2.07716	0.0497488	0.929651	Up
CL45369Contig1	73.56	30.8157	116.304	3.77419	1.91617	0.0227886	0.648598	Up
CL45370Contig1	141.829	37.4191	246.238	6.58055	2.71821	0.000552713	0.0623983	Up	gi|541963919|ref|XP_005437156.1|PREDICTED: uncharacterized protein LOC102054785 [Falco cherrug]	2.58115e-49	sp|P10272|POL_BAEVM	3e-33	Pol polyprotein OS=Baboon endogenous virus (strain M7) GN=pol PE=3 SV=1	KOG0017	4e-25	FOG: Transposon-encoded proteins with TYA, reverse transcriptase, integrase domains in various combinations		GO:0019028;GO:0046718;GO:0090305;GO:0003723;GO:0006310;GO:0008270;GO:0006278;GO:0019068;GO:0003887;GO:0003964;GO:0004523;GO:0003677;GO:0006508;GO:0075713;GO:0004190;GO:0005198;GO:0015074	viral capsid|viral entry into host cell|nucleic acid phosphodiester bond hydrolysis|RNA binding|DNA recombination|zinc ion binding|RNA-dependent DNA replication|virion assembly|DNA-directed DNA polymerase activity|RNA-directed DNA polymerase activity|RNA-DNA hybrid ribonuclease activity|DNA binding|proteolysis|establishment of integrated proviral latency|aspartic-type endopeptidase activity|struc…
CL45376Contig1	33.3119	12.1062	54.5177	4.50329	2.17098	0.0280135	0.71455	Up
CL45398Contig1	8.63196	0	17.2639	Inf	Inf	0.0141475	0.496422	Up	gi|514738360|ref|XP_005017781.1|PREDICTED: protein-methionine sulfoxide oxidase MICAL2 [Anas platyrhynchos]	7.93074e-99
CL45402Contig1	3488.64	1500.06	5477.21	3.65131	1.86842	0.000152534	0.0244593	Up	gi|356950524|gb|AEF79983.1|immunoglobulin alpha heavy chain, partial [Anser anser domesticus]	0	sp|P20768|IGHM_SUNMU	2e-71	Ig mu chain C region OS=Suncus murinus PE=4 SV=1				ko04145, Phagosome;ko04020, Calcium signaling pathway;ko04064, NF-kappa B signaling pathway;ko04151, PI3K-Akt signaling pathway;ko05202, Transcriptional misregulation in cancers;ko05414, Dilated cardiomyopathy (DCM);ko05416, Viral myocarditis;ko05310, Asthma;ko05320, Autoimmune thyroid disease;ko05322, Systemic lupus erythematosus;ko05323, Rheumatoid arthritis;ko05330, Allograft rejection;ko05340…
CL45453Contig1	166.591	86.9443	246.238	2.83214	1.50189	0.0395517	0.838822	Up	gi|449280293|gb|EMC87620.1|hypothetical protein A306_03550, partial [Columba livia]	1.52218e-77
CL45459Contig1	98.1695	47.3241	149.015	3.14882	1.65481	0.0371711	0.811975	Up
CL45482Contig1	70.8341	30.8157	110.853	3.59727	1.8469	0.0287017	0.722571	Up
CL45493Contig1	59.1629	22.0112	96.3145	4.3757	2.12951	0.0155084	0.529042	Up
CL45638Contig1	29.5814	11.0056	48.1573	4.3757	2.12951	0.036575	0.804503	Up
CL4563Contig1	41.2017	8.80449	73.5988	8.35924	3.06337	0.00210967	0.157603	Up	gi|483521267|gb|EOB06398.1|hypothetical protein Anapl_04050 [Anas platyrhynchos]	1.57813e-11
CL45666Contig1	87.6826	0	175.365	Inf	Inf	7.99363e-10	8.21402e-07	Up
CL45686Contig1	52.4635	7.70393	97.2232	12.6199	3.65763	0.00023465	0.0330024	Up
CL45687Contig1	37.1128	8.80449	65.4212	7.43044	2.89345	0.00408772	0.242713	Up
CL45699Contig1	40.6065	17.609	63.6039	3.61202	1.85281	0.0460822	0.890705	Up
CL45766Contig1	34.0286	9.90505	58.1522	5.87096	2.5536	0.0111114	0.443242	Up
CL45786Contig1	88.5013	19.8101	157.193	7.93497	2.98823	0.000532808	0.0608332	Up
CL45849Contig1	77.6877	0	155.375	Inf	Inf	2.77152e-09	2.49194e-06	Up	gi|6576738|dbj|BAA88337.1|ORF2 [Acanthochelys spixii]	1.14889e-17
CL45853Contig1	42.4942	13.2067	71.7816	5.43523	2.44234	0.010073	0.419507	Up
CL45883Contig1	85.7816	40.7208	130.842	3.21316	1.68399	0.0382548	0.826682	Up	gi|2331059|gb|AAC60281.1|unknown [Gallus gallus]	6.4313e-33
CL45933Contig1	2217.81	1358.09	3077.52	2.26606	1.18019	0.0175053	0.572343	Up	gi|71361840|gb|AAZ30019.1|transporter of antigen processing 2 [Anas platyrhynchos]	0	sp|Q03519|TAP2_HUMAN	2e-109	Antigen peptide transporter 2 OS=Homo sapiens GN=TAP2 PE=1 SV=1	KOG0058	1e-111	Peptide exporter, ABC superfamily	ko04145, Phagosome;ko02010, ABC transporters;ko05340, Primary immunodeficiency;ko05168, Herpes simplex infection;ko04612, Antigen processing and presentation;	GO:0001916;GO:0046979;GO:0002485;GO:0042825;GO:0002489;GO:0005743;GO:0042288;GO:0046978;GO:0015833;GO:0015421;GO:0055085;GO:0042605;GO:0006200;GO:0005886;GO:0002481;GO:0005524;GO:0002591;GO:0046980	positive regulation of T cell mediated cytotoxicity|TAP2 binding|antigen processing and presentation of endogenous peptide antigen via MHC class I via ER pathway, TAP-dependent|TAP complex|antigen processing and presentation of endogenous peptide antigen via MHC class Ib via ER pathway, TAP-dependent|mitochondrial inner membrane|MHC class I protein binding|TAP1 binding|peptide transport|oligopept…
CL46049Contig1	86.4983	38.5196	134.477	3.49113	1.80369	0.026914	0.709501	Up	gi|326932785|ref|XP_003212493.1|PREDICTED: c-C motif chemokine 26-like [Meleagris gallopavo]	5.93026e-28	sp|Q17QA1|CCL4_BOVIN	2e-10	C-C motif chemokine 4 OS=Bos taurus GN=CCL4 PE=3 SV=1				ko04060, Cytokine-cytokine receptor interaction;ko04062, Chemokine signaling pathway;	GO:0005576;GO:0008009;GO:0006955	extracellular region|chemokine activity|immune response
CL46056Contig1	369.247	113.358	625.136	5.51471	2.46329	0.000184013	0.0280252	Up
CL4605Contig1	60.097	27.514	92.68	3.36846	1.75209	0.0423945	0.859059	Up
CL4607Contig1	30.1317	12.1062	48.1573	3.97791	1.99201	0.047714	0.911053	Up
CL46095Contig1	12.9127	2.20112	23.6243	10.7329	3.42396	0.026747	0.70668	Up	gi|514751125|ref|XP_005031863.1|PREDICTED: LOW QUALITY PROTEIN: deiodinase, iodothyronine, type III [Anas platyrhynchos]	6.80441e-148	sp|O42412|IOD3_CHICK	4e-172	Type III iodothyronine deiodinase (Fragment) OS=Gallus gallus GN=DIO3 PE=2 SV=3				ko04919, Thyroid hormone signaling pathway;	GO:0005886;GO:0004800;GO:0033798;GO:0042446;GO:0016021;GO:0010008;GO:0055114	plasma membrane|thyroxine 5'-deiodinase activity|thyroxine 5-deiodinase activity|hormone biosynthetic process|integral component of membrane|endosome membrane|oxidation-reduction process
CL46107Contig1	14.8259	3.30168	26.3502	7.98084	2.99654	0.0317853	0.760062	Up
CL461Contig1	153.461	77.0393	229.883	2.98397	1.57723	0.0331809	0.777692	Up	gi|483508187|gb|EOA98429.1|hypothetical protein Anapl_18198 [Anas platyrhynchos]	1.84122e-16	sp|P87889|GAK10_HUMAN	2e-06	HERV-K_5q33.3 provirus ancestral Gag polyprotein OS=Homo sapiens PE=1 SV=4
CL461Contig2	283.6	42.9219	524.278	12.2147	3.61055	8.50675e-07	0.000334628	Up	gi|449495454|ref|XP_002191900.2|PREDICTED: uncharacterized protein LOC100228131 [Taeniopygia guttata]	1.24273e-79	sp|P03365|POL_MMTVB	5e-69	Pol polyprotein OS=Mouse mammary tumor virus (strain BR6) GN=pol PE=3 SV=2	KOG0017	3e-43	FOG: Transposon-encoded proteins with TYA, reverse transcriptase, integrase domains in various combinations		GO:0019031;GO:0046718;GO:0051028;GO:0008270;GO:0003887;GO:0000166;GO:0015074;GO:0006310;GO:0003964;GO:0046080;GO:0075713;GO:0005737;GO:0005730;GO:0003677;GO:0039660;GO:0004190;GO:0006278;GO:0003723;GO:0006508;GO:0019013;GO:0004523;GO:0090305	viral envelope|viral entry into host cell|mRNA transport|zinc ion binding|DNA-directed DNA polymerase activity|nucleotide binding|DNA integration|DNA recombination|RNA-directed DNA polymerase activity|dUTP metabolic process|establishment of integrated proviral latency|cytoplasm|nucleolus|DNA binding|structural constituent of virion|aspartic-type endopeptidase activity|RNA-dependent DNA replicatio…
CL461Contig3	1070.69	305.956	1835.43	5.99899	2.58472	4.21445e-06	0.00136905	Up	gi|449495454|ref|XP_002191900.2|PREDICTED: uncharacterized protein LOC100228131 [Taeniopygia guttata]	0	sp|P11283|POL_MMTVC	0	Gag-Pro-Pol polyprotein OS=Mouse mammary tumor virus (strain C3H) GN=gag-pro-pol PE=1 SV=2	KOG0017	4e-41	FOG: Transposon-encoded proteins with TYA, reverse transcriptase, integrase domains in various combinations		GO:0046718;GO:0090305;GO:0003723;GO:0006310;GO:0008270;GO:0006278;GO:0005730;GO:0003887;GO:0003964;GO:0004523;GO:0003677;GO:0075713;GO:0019031;GO:0005198;GO:0005737;GO:0015074;GO:0051028	viral entry into host cell|nucleic acid phosphodiester bond hydrolysis|RNA binding|DNA recombination|zinc ion binding|RNA-dependent DNA replication|nucleolus|DNA-directed DNA polymerase activity|RNA-directed DNA polymerase activity|RNA-DNA hybrid ribonuclease activity|DNA binding|establishment of integrated proviral latency|viral envelope|structural molecule activity|cytoplasm|DNA integration|mRN…
CL46208Contig1	152.264	73.7376	230.791	3.1299	1.64612	0.026733	0.70668	Up
CL46266Contig1	67.5069	18.7095	116.304	6.21631	2.63606	0.00290435	0.19116	Up
CL46289Contig1	41.5151	17.609	65.4212	3.71522	1.89345	0.0409516	0.848713	Up
CL46328Contig1	32.1154	8.80449	55.4263	6.29523	2.65426	0.00984223	0.414294	Up
CL46383Contig1	37.2088	9.90505	64.5126	6.5131	2.70334	0.00651548	0.329146	Up
CL4638Contig1	23.9377	8.80449	39.071	4.43762	2.14979	0.0486141	0.921153	Up
CL46420Contig1	16.0929	2.20112	29.9847	13.6225	3.76792	0.00929952	0.400548	Up
CL46584Contig1	26.0174	6.60337	45.4314	6.88003	2.78242	0.0118381	0.452616	Up
CL46609Contig1	26.0174	6.60337	45.4314	6.88003	2.78242	0.0118381	0.452616	Up
CL4663Contig1	22.2869	5.5028	39.071	7.10019	2.82786	0.01562	0.531521	Up
CL46642Contig1	33.12	9.90505	56.3349	5.68749	2.50779	0.0130119	0.480336	Up
CL46647Contig1	42.2063	9.90505	74.5075	7.52217	2.91115	0.00298206	0.195507	Up
CL46808Contig1	32.9536	13.2067	52.7004	3.99042	1.99654	0.0420307	0.854721	Up
CL4681Contig1	60.9546	16.5084	105.401	6.38467	2.67461	0.00303814	0.197895	Up
CL46842Contig1	37.708	0	75.4161	Inf	Inf	1.21503e-06	0.000443319	Up
CL46904Contig1	57.704	20.9107	94.4973	4.5191	2.17603	0.0139906	0.496422	Up
CL46934Contig1	11.9081	1.10056	22.7157	20.6401	4.36738	0.0141131	0.496422	Up	gi|483513883|gb|EOB01762.1|hypothetical protein Anapl_14448 [Anas platyrhynchos]	9.53366e-14
CL4699Contig1	27.9051	2.20112	53.609	24.3553	4.60617	0.000317775	0.041882	Up
CL47012Contig1	23.8418	7.70393	39.9796	5.18951	2.3756	0.0317906	0.760062	Up
CL47025Contig1	142.097	56.1286	228.066	4.06327	2.02264	0.00789055	0.369579	Up
CL47087Contig1	547.902	0	1095.8	Inf	Inf	5.93535e-23	5.97702e-19	Up	gi|514768190|ref|XP_005024870.1|PREDICTED: mucin-12-like [Anas platyrhynchos]	1.57776e-94	sp|Q9H195|MUC3B_HUMAN	6e-35	Mucin-3B (Fragments) OS=Homo sapiens GN=MUC3B PE=2 SV=2
CL47189Contig1	30.631	2.20112	59.0608	26.8321	4.74589	0.000164412	0.0261627	Up
CL47285Contig1	2985.64	1660.75	4310.53	2.59554	1.37603	0.00494427	0.277831	Up	gi|514733478|ref|XP_005016856.1|PREDICTED: uncharacterized protein LOC101797709 isoform X1 [Anas platyrhynchos]	1.53729e-125
CL472Contig1	124.257	49.5252	198.989	4.01794	2.00646	0.00974478	0.411973	Up
CL47300Contig1	1234.98	600.906	1869.05	3.11038	1.63709	0.00213566	0.158741	Up
CL47327Contig1	71.7816	0	143.563	Inf	Inf	5.90975e-09	5.13038e-06	Up
CL47337Contig1	18.6524	5.5028	31.802	5.77923	2.53088	0.0385861	0.827801	Up
CL473Contig1	2335.95	951.985	3719.92	3.90754	1.96626	0.000101404	0.0178524	Up	gi|514751855|ref|XP_005020962.1|PREDICTED: V-set and immunoglobulin domain-containing protein 4-like isoform X1 [Anas platyrhynchos]	4.23892e-16
CL47419Contig1	56.7892	0	113.578	Inf	Inf	4.59272e-08	3.0496e-05	Up
CL4744Contig1	46.2502	19.8101	72.6902	3.66935	1.87553	0.0385628	0.827801	Up
CL47470Contig1	14.8259	3.30168	26.3502	7.98084	2.99654	0.0317853	0.760062	Up
CL47494Contig1	16.9056	1.10056	32.7106	29.7217	4.89345	0.0023032	0.164261	Up
CL47508Contig1	38.8086	2.20112	75.4161	34.2626	5.09856	2.91097e-05	0.00660226	Up
CL47547Contig1	12.7208	0	25.4416	Inf	Inf	0.00222793	0.160484	Up	gi|483496480|gb|EOA93709.1|hypothetical protein Anapl_11404 [Anas platyrhynchos]	3.64329e-22
CL47565Contig1	53.609	0	107.218	Inf	Inf	7.384e-08	4.42609e-05	Up
CL47569Contig1	52.777	16.5084	89.0455	5.39395	2.43134	0.00762378	0.361115	Up	gi|483508112|gb|EOA98383.1|Uncharacterized protein C6orf81-like protein [Anas platyrhynchos]	1.26133e-22
CL47589Contig1	26.4717	6.60337	46.34	7.01763	2.81098	0.0107234	0.432868	Up
CL47603Contig1	20.0153	5.5028	34.5278	6.27459	2.64952	0.0273481	0.713473	Up
CL47610Contig1	747.771	307.056	1188.48	3.87057	1.95255	0.000704648	0.0748518	Up	gi|514730000|ref|XP_005016019.1|PREDICTED: beta-galactoside-binding lectin-like [Anas platyrhynchos]	2.21799e-74	sp|P07583|LEG4_CHICK	1e-89	Beta-galactoside-binding lectin OS=Gallus gallus PE=1 SV=2	KOG3587	1e-49	Galectin, galactose-binding lectin		GO:0031295;GO:0004871;GO:0005622;GO:0016936;GO:0043123;GO:0005615;GO:0045445;GO:0007165;GO:0031012;GO:0002317;GO:0030246	T cell costimulation|signal transducer activity|intracellular|galactoside binding|positive regulation of I-kappaB kinase/NF-kappaB signaling|extracellular space|myoblast differentiation|signal transduction|extracellular matrix|plasma cell differentiation|carbohydrate binding
CL47647Contig1	31.0403	12.1062	49.9745	4.12802	2.04545	0.0408928	0.848713	Up
CL47684Contig1	54.2614	23.1118	85.411	3.69556	1.88579	0.0325725	0.768177	Up
CL47701Contig1	504.503	242.123	766.882	3.16732	1.66326	0.00609485	0.317683	Up
CL47720Contig1	29.0761	0	58.1522	Inf	Inf	9.35101e-06	0.00270593	Up	gi|551552462|ref|XP_005763615.1|hypothetical protein EMIHUDRAFT_41601, partial [Emiliania huxleyi CCMP1516] >gi|485613020|gb|EOD11186.1| hypothetical protein EMIHUDRAFT_41601, partial [Emiliania huxleyi CCMP1516]	7.84208e-13	sp|Q5ISE2|Z36L3_MOUSE	5e-11	Zinc finger protein 36, C3H1 type-like 3 OS=Mus musculus GN=Zfp36l3 PE=1 SV=1
CL47734Contig1	233.004	124.363	341.644	2.74714	1.45793	0.0343984	0.790866	Up	gi|514761656|ref|XP_005023304.1|PREDICTED: coiled-coil domain-containing protein 13 isoform X1 [Anas platyrhynchos]	0	sp|Q8IYE1|CCD13_HUMAN	0	Coiled-coil domain-containing protein 13 OS=Homo sapiens GN=CCDC13 PE=2 SV=2	KOG0161	3e-11	Myosin class II heavy chain
CL4774Contig1	25.755	8.80449	42.7055	4.85042	2.27811	0.0335725	0.783555	Up
CL47781Contig1	29.2935	7.70393	50.8831	6.60483	2.72352	0.0102464	0.422126	Up
CL4780Contig1	57.8959	23.1118	92.68	4.01008	2.00363	0.0224362	0.644538	Up
CL47873Contig1	16.6432	3.30168	29.9847	9.08164	3.18295	0.0183887	0.587629	Up
CL47948Contig1	16.6432	3.30168	29.9847	9.08164	3.18295	0.0183887	0.587629	Up
CL47954Contig1	104.767	39.6202	169.913	4.28855	2.10049	0.00864563	0.388686	Up
CL47955Contig1	15.5426	1.10056	29.9847	27.2449	4.76792	0.00369474	0.227983	Up
CL48070Contig1	57.2752	26.4135	88.1369	3.33682	1.73847	0.0455475	0.885468	Up	gi|34850159|dbj|BAC87796.1|Aryl Hydrocarbon Receptor 2 [Phoebastria nigripes]	0	sp|Q95LD9|AHR_DELLE	9e-141	Aryl hydrocarbon receptor OS=Delphinapterus leucas GN=AHR PE=2 SV=1	KOG3560	5e-141	Aryl-hydrocarbon receptor		GO:0004871;GO:0006355;GO:0003677;GO:0046983;GO:0007165;GO:0005634;GO:0006351	signal transducer activity|regulation of transcription, DNA-templated|DNA binding|protein dimerization activity|signal transduction|nucleus|transcription, DNA-templated
CL48113Contig1	60.1869	7.70393	112.67	14.625	3.87036	8.67367e-05	0.015881	Up
CL48116Contig1	15.9969	1.10056	30.8933	28.0705	4.81098	0.00315118	0.20372	Up
CL48153Contig1	24.0082	4.40224	43.6141	9.90725	3.30848	0.00526311	0.28836	Up
CL48194Contig1	34.4125	14.3073	54.5177	3.81048	1.92997	0.0461802	0.890888	Up
CL48202Contig1	107.218	0	214.436	Inf	Inf	9.1379e-11	1.27806e-07	Up	gi|514756423|ref|XP_005022074.1|PREDICTED: uncharacterized protein LOC101791992 [Anas platyrhynchos]	1.1085e-53								GO:0016021;GO:0070588;GO:0005622;GO:0005262;GO:0044297;GO:0032584;GO:0090280;GO:0009408;GO:0009986;GO:0044295;GO:0045773	integral component of membrane|calcium ion transmembrane transport|intracellular|calcium channel activity|cell body|growth cone membrane|positive regulation of calcium ion import|response to heat|cell surface|axonal growth cone|positive regulation of axon extension
CL48230Contig1	25.8959	0	51.7918	Inf	Inf	2.26076e-05	0.00526999	Up
CL48285Contig1	23.8163	2.20112	45.4314	20.6401	4.36738	0.000927478	0.0894625	Up
CL48315Contig1	31.4947	12.1062	50.8831	4.20308	2.07145	0.0378804	0.821058	Up
CL48346Contig1	7.72333	0	15.4467	Inf	Inf	0.0222382	0.642775	Up
CL48389Contig1	23.2915	6.60337	39.9796	6.05443	2.59799	0.021748	0.641504	Up
CL48393Contig1	648.972	398.403	899.541	2.25787	1.17496	0.0412308	0.850041	Up	gi|564256411|ref|XP_006267172.1|PREDICTED: M-phase inducer phosphatase 1-B-like [Alligator mississippiensis]	9.64227e-08	sp|P30309|MPI1B_XENLA	4e-07	M-phase inducer phosphatase 1-B OS=Xenopus laevis GN=cdc25-1-b PE=2 SV=1
CL4842Contig1	1606.93	1063.14	2150.72	2.02299	1.01649	0.0461659	0.890888	Up	gi|514758096|ref|XP_005022470.1|PREDICTED: calmegin [Anas platyrhynchos]	0	sp|O14967|CLGN_HUMAN	0	Calmegin OS=Homo sapiens GN=CLGN PE=1 SV=1	KOG0675	0	Calnexin		GO:0006461;GO:0006457;GO:0007339;GO:0005635;GO:0005509;GO:0051082;GO:0005783	protein complex assembly|protein folding|binding of sperm to zona pellucida|nuclear envelope|calcium ion binding|unfolded protein binding|endoplasmic reticulum
CL48498Contig1	30.439	0	60.878	Inf	Inf	6.5535e-06	0.0019759	Up
CL48499Contig1	68.1471	0	136.294	Inf	Inf	9.51659e-09	7.98552e-06	Up	gi|514794413|ref|XP_005030916.1|PREDICTED: cyclic AMP-responsive element-binding protein 3-like protein 4-like, partial [Anas platyrhynchos]	1.46594e-39	sp|Q08CW8|CR3L4_XENTR	6e-18	Cyclic AMP-responsive element-binding protein 3-like protein 4 OS=Xenopus tropicalis GN=creb3l4 PE=2 SV=1	KOG0709	1e-17	CREB/ATF family transcription factor		GO:0019043;GO:0002230;GO:0042127;GO:0000139;GO:0042994;GO:2000326;GO:0001558;GO:0000977;GO:0005829;GO:0051928;GO:0006990;GO:0016604;GO:0043025;GO:0008140;GO:0050930;GO:0031726;GO:0090045;GO:0090026;GO:0003700;GO:0042803;GO:0030176;GO:0003682	establishment of viral latency|positive regulation of defense response to virus by host|regulation of cell proliferation|Golgi membrane|cytoplasmic sequestering of transcription factor|negative regulation of ligand-dependent nuclear receptor transcription coactivator activity|regulation of cell growth|RNA polymerase II regulatory region sequence-specific DNA binding|cytosol|positive regulation of…
CL48581Contig1	14.3716	3.30168	25.4416	7.70564	2.94591	0.0365248	0.804503	Up
CL48586Contig1	46.7943	0	93.5886	Inf	Inf	2.20696e-07	0.00011339	Up
CL48592Contig1	504.297	276.241	732.354	2.65114	1.40661	0.019464	0.604212	Up
CL48619Contig1	719.259	193.699	1244.82	6.42658	2.68405	6.89582e-06	0.00206673	Up	gi|483525316|gb|EOB08982.1|hypothetical protein Anapl_03960 [Anas platyrhynchos]	1.45466e-18
CL4861Contig1	52.681	15.4079	89.9541	5.8382	2.54552	0.00553716	0.298823	Up
CL48655Contig1	18.9148	3.30168	34.5278	10.4577	3.38649	0.00947587	0.403655	Up
CL48721Contig1	28.1675	0	56.3349	Inf	Inf	1.19406e-05	0.00328536	Up	gi|449282263|gb|EMC89127.1|hypothetical protein A306_01947, partial [Columba livia]	6.65296e-08
CL48740Contig1	1450.26	959.689	1940.83	2.02235	1.01603	0.0486953	0.921153	Up	gi|513228752|ref|XP_001233390.2|PREDICTED: phorbol-12-myristate-13-acetate-induced protein 1 [Gallus gallus]	2.6912e-15							ko04115, p53 signaling pathway;ko05203, Viral carcinogenesis;
CL4877Contig1	34.5789	11.0056	58.1522	5.28387	2.40159	0.0154717	0.528146	Up	gi|514713192|ref|XP_005012014.1|PREDICTED: zinc finger protein 185 isoform X1 [Anas platyrhynchos]	0	sp|Q62394|ZN185_MOUSE	7e-38	Zinc finger protein 185 OS=Mus musculus GN=Znf185 PE=2 SV=1	KOG1704	3e-38	FOG: LIM domain		GO:0008270	zinc ion binding
CL48835Contig1	1190.54	581.096	1799.99	3.09758	1.63114	0.0023161	0.164615	Up	gi|514773437|ref|XP_005026110.1|PREDICTED: protein FAM214A isoform X4 [Anas platyrhynchos]	0	sp|Q5ZI58|F214A_CHICK	0	Protein FAM214A OS=Gallus gallus GN=FAM214A PE=2 SV=2	KOG2306	0	Uncharacterized conserved protein
CL4956Contig1	38.5013	14.3073	62.6953	4.38205	2.13161	0.0251833	0.681356	Up
CL4976Contig1	149.539	73.7376	225.34	3.05597	1.61163	0.0303482	0.749785	Up	gi|483522209|gb|EOB07020.1|Netrin receptor DCC [Anas platyrhynchos]	0	sp|P43146|DCC_HUMAN	0	Netrin receptor DCC OS=Homo sapiens GN=DCC PE=1 SV=2	KOG4221	0	Receptor mediating netrin-dependent axon guidance		GO:0045121;GO:0001764;GO:0001975;GO:0048671;GO:0070374;GO:0032584;GO:2000171;GO:0006915;GO:0033564;GO:0005829;GO:0033563;GO:0021965;GO:0003713;GO:0042802;GO:0043065;GO:0030424;GO:0016021;GO:0010976;GO:0005042	membrane raft|neuron migration|response to amphetamine|negative regulation of collateral sprouting|positive regulation of ERK1 and ERK2 cascade|growth cone membrane|negative regulation of dendrite development|apoptotic process|anterior/posterior axon guidance|cytosol|dorsal/ventral axon guidance|spinal cord ventral commissure morphogenesis|transcription coactivator activity|identical protein bind…
CL5010Contig1	45.2456	18.7095	71.7816	3.83663	1.93984	0.0335864	0.783555	Up
CL5017Contig1	343.081	172.788	513.375	2.97112	1.57101	0.0149175	0.515874	Up	gi|50762252|ref|XP_424990.1|PREDICTED: cyclic AMP-responsive element-binding protein 3 [Gallus gallus]	5.00614e-83	sp|Q08CW8|CR3L4_XENTR	2e-32	Cyclic AMP-responsive element-binding protein 3-like protein 4 OS=Xenopus tropicalis GN=creb3l4 PE=2 SV=1	KOG0709	6e-32	CREB/ATF family transcription factor	ko04022, cGMP - PKG signaling pathway;ko04024, cAMP signaling pathway;ko04151, PI3K-Akt signaling pathway;ko04152, AMPK signaling pathway;ko04668, TNF signaling pathway;ko05203, Viral carcinogenesis;ko05215, Prostate cancer;ko05161, Hepatitis B;ko05016, Huntington's disease;ko05030, Cocaine addiction;ko05031, Amphetamine addiction;ko05034, Alcoholism;ko04261, Adrenergic signaling in cardiomyocyte…	GO:0019043;GO:0002230;GO:0042127;GO:0000139;GO:0042994;GO:2000326;GO:0001558;GO:0000977;GO:0005829;GO:0051928;GO:0006990;GO:0016604;GO:0043025;GO:0008140;GO:0050930;GO:0031726;GO:0090045;GO:0090026;GO:0003700;GO:0042803;GO:0030176;GO:0003682	establishment of viral latency|positive regulation of defense response to virus by host|regulation of cell proliferation|Golgi membrane|cytoplasmic sequestering of transcription factor|negative regulation of ligand-dependent nuclear receptor transcription coactivator activity|regulation of cell growth|RNA polymerase II regulatory region sequence-specific DNA binding|cytosol|positive regulation of…
CL5034Contig1	26.7596	9.90505	43.6141	4.40322	2.13856	0.0417805	0.854721	Up	gi|514783715|ref|XP_005028383.1|PREDICTED: protocadherin alpha-C1, partial [Anas platyrhynchos]	0	sp|Q5DRE2|PCDC1_PANTR	3e-180	Protocadherin alpha-C1 OS=Pan troglodytes GN=PCDHAC1 PE=3 SV=1	KOG3594	0	FOG: Cadherin repeats		GO:0016021;GO:0007156;GO:0005509;GO:0005886	integral component of membrane|homophilic cell adhesion|calcium ion binding|plasma membrane
CL5170Contig2	22.0245	7.70393	36.3451	4.71774	2.2381	0.0472413	0.904428	Up
CL5184Contig1	41.5151	17.609	65.4212	3.71522	1.89345	0.0409516	0.848713	Up
CL5229Contig1	64.3778	29.7151	99.0404	3.33299	1.73682	0.0418489	0.854721	Up
CL522Contig1	46.3206	15.4079	77.2333	5.0126	2.32556	0.0121185	0.461858	Up
CL5270Contig1	61.0761	23.1118	99.0404	4.28528	2.09939	0.0163168	0.543007	Up
CL5314Contig1	16.6432	3.30168	29.9847	9.08164	3.18295	0.0183887	0.587629	Up
CL5407Contig1	440.163	259.732	620.593	2.38935	1.25662	0.0403923	0.846811	Up
CL5452Contig1	170.053	69.3353	270.771	3.90524	1.96541	0.00782414	0.367494	Up	gi|514735999|ref|XP_005017437.1|PREDICTED: LOW QUALITY PROTEIN: protein prune homolog 2 [Anas platyrhynchos]	0	sp|Q8WUY3|PRUN2_HUMAN	0	Protein prune homolog 2 OS=Homo sapiens GN=PRUNE2 PE=1 SV=3	KOG4406	4e-24	CDC42 Rho GTPase-activating protein		GO:0006915;GO:0046872;GO:0005794;GO:0005634;GO:0016462	apoptotic process|metal ion binding|Golgi apparatus|nucleus|pyrophosphatase activity
CL5487Contig1	3091.43	1785.11	4397.76	2.46358	1.30076	0.00767267	0.363089	Up	gi|527263686|ref|XP_005150071.1|PREDICTED: aquaporin-1 [Melopsittacus undulatus]	2.2869e-144	sp|Q6PQZ1|AQP1_PIG	1e-153	Aquaporin-1 OS=Sus scrofa GN=AQP1 PE=2 SV=3	KOG0223	3e-152	Aquaporin (major intrinsic protein family)	ko04976, Bile secretion;ko04964, Proximal tubule bicarbonate reclamation;	GO:0008519;GO:0031526;GO:0070062;GO:0048146;GO:0035377;GO:0048593;GO:0016021;GO:0021670;GO:0016324;GO:0033363;GO:0015250;GO:0030185;GO:0009925;GO:0030184;GO:0006884;GO:0046878;GO:0045766;GO:0005267;GO:0085018;GO:0071456;GO:0019233;GO:0071549;GO:0072220;GO:0070301;GO:0071472;GO:0072232;GO:0034644;GO:0005223;GO:0051458;GO:0003094;GO:0042060;GO:0072239;GO:0042383;GO:0005737;GO:0071300;GO:0020003;GO:…	ammonium transmembrane transporter activity|brush border membrane|extracellular vesicular exosome|positive regulation of fibroblast proliferation|transepithelial water transport|camera-type eye morphogenesis|integral component of membrane|lateral ventricle development|apical plasma membrane|secretory granule organization|water channel activity|nitric oxide transport|basal plasma membrane|nitric o…
CL5492Contig1	711.943	359.883	1064	2.95652	1.5639	0.00637804	0.329098	Up	gi|326928293|ref|XP_003210315.1|PREDICTED: dedicator of cytokinesis protein 2-like [Meleagris gallopavo]	1.01741e-06
CL5541Contig1	235.295	108.956	361.634	3.3191	1.73079	0.0126141	0.469424	Up
CL5560Contig1	586.645	183.794	989.495	5.38373	2.42861	6.68858e-05	0.0128052	Up	gi|514731073|ref|XP_005016270.1|PREDICTED: uncharacterized protein LOC101803964 isoform X1 [Anas platyrhynchos] >gi|514731077|ref|XP_005016271.1| PREDICTED: uncharacterized protein LOC101803964 isoform X2 [Anas platyrhynchos] >gi|514731081|ref|XP_005016272.1| PREDICTED: uncharacterized protein LOC101803964 isoform X3 [Anas platyrhynchos]	2.60505e-83
CL5602Contig1	474.857	256.431	693.283	2.70359	1.43488	0.0183294	0.587629	Up
CL5610Contig1	31.802	0	63.6039	Inf	Inf	4.6532e-06	0.00150188	Up	gi|32812298|gb|AAP88020.1|AF355752_1reverse transcriptase [Chelonia mydas]	2.1876e-29								GO:0006214;GO:0006145;GO:0004725;GO:0007409;GO:0051536;GO:0004158;GO:0005829;GO:0035335;GO:0006212;GO:0005578;GO:0006222;GO:0055114;GO:0006210;GO:0072534	thymidine catabolic process|purine nucleobase catabolic process|protein tyrosine phosphatase activity|axonogenesis|iron-sulfur cluster binding|dihydroorotate oxidase activity|cytosol|peptidyl-tyrosine dephosphorylation|uracil catabolic process|proteinaceous extracellular matrix|UMP biosynthetic process|oxidation-reduction process|thymine catabolic process|perineuronal net
CL5645Contig1	722.545	392.9	1052.19	2.67801	1.42116	0.0126301	0.469673	Up	gi|514767566|ref|XP_005024717.1|PREDICTED: lactosylceramide 1,3-N-acetyl-beta-D-glucosaminyltransferase isoform X1 [Anas platyrhynchos] >gi|514767570|ref|XP_005024718.1| PREDICTED: lactosylceramide 1,3-N-acetyl-beta-D-glucosaminyltransferase isoform X2 [Anas platyrhynchos] >gi|514767573|ref|XP_005024719.1| PREDICTED: lactosylceramide 1,3-N-acetyl-beta-D-glucosaminyltransferase isoform X3 [Anas pl…	0	sp|Q864U8|B3GN5_PIG	0	Lactosylceramide 1,3-N-acetyl-beta-D-glucosaminyltransferase OS=Sus scrofa GN=B3GNT5 PE=2 SV=1	KOG2287	0	Galactosyltransferases	ko00601, Glycosphingolipid biosynthesis - lacto and neolacto series;	GO:0007417;GO:0008457;GO:0005794;GO:0008378;GO:0006486;GO:0016021;GO:0008917	central nervous system development|beta-galactosyl-N-acetylglucosaminylgalactosylglucosyl-ceramide beta-1,3-acetylglucosaminyltransferase activity|Golgi apparatus|galactosyltransferase activity|protein glycosylation|integral component of membrane|lipopolysaccharide N-acetylglucosaminyltransferase activity
CL5645Contig2	1167.45	597.605	1737.3	2.9071	1.53958	0.00402727	0.239973	Up
CL5651Contig1	1067.91	529.37	1606.45	3.03465	1.60153	0.0031491	0.20372	Up
CL5664Contig2	22685.7	12019.2	33352.1	2.77489	1.47243	0.00516209	0.285622	Up	gi|530660047|ref|XP_005315081.1|PREDICTED: uncharacterized protein LOC101941290, partial [Chrysemys picta bellii]	7.99071e-96	sp|Q14264|ENR1_HUMAN	1e-67	HERV-R_7q21.2 provirus ancestral Env polyprotein OS=Homo sapiens GN=ERV3-1 PE=1 SV=2	KOG0017	6e-17	FOG: Transposon-encoded proteins with TYA, reverse transcriptase, integrase domains in various combinations		GO:0005198;GO:0019058;GO:0019028;GO:0019031	structural molecule activity|viral life cycle|viral capsid|viral envelope
CL5724Contig1	29.1016	5.5028	52.7004	9.57701	3.25957	0.00327658	0.208879	Up
CL5739Contig1	34.9372	9.90505	59.9694	6.05443	2.59799	0.00951063	0.40411	Up
CL5755Contig1	18.1021	4.40224	31.802	7.22404	2.85281	0.0244981	0.666399	Up
CL5826Contig1	31.9235	6.60337	57.2435	8.66884	3.11584	0.00347037	0.217239	Up
CL5847Contig1	34.387	8.80449	59.9694	6.81123	2.76792	0.00653684	0.329146	Up
CL5858Contig1	7.72333	0	15.4467	Inf	Inf	0.0222382	0.642775	Up
CL585Contig1	136.927	38.5196	235.335	6.10947	2.61105	0.000905749	0.0878717	Up
CL5905Contig1	38.1879	5.5028	70.873	12.8794	3.687	0.00054973	0.062201	Up	gi|513165836|ref|XP_004938847.1|PREDICTED: probable phospholipid-transporting ATPase IB isoform X10 [Gallus gallus]	9.77817e-12								GO:0004012;GO:0005524;GO:0000287;GO:0016021;GO:0019829	phospholipid-translocating ATPase activity|ATP binding|magnesium ion binding|integral component of membrane|cation-transporting ATPase activity
CL5939Contig1	45.0536	16.5084	73.5988	4.45826	2.15648	0.0195144	0.604287	Up
CL593Contig1	45.316	14.3073	76.3247	5.33467	2.4154	0.00983906	0.414294	Up
CL5949Contig1	23.3875	7.70393	39.071	5.07157	2.34243	0.0350725	0.798886	Up
CL6008Contig1	48.1634	20.9107	75.4161	3.60659	1.85063	0.0395426	0.838822	Up
CL6033Contig1	30.586	12.1062	49.0659	4.05297	2.01898	0.044163	0.877526	Up
CL6037Contig1	302.61	125.464	479.755	3.82385	1.93503	0.00377421	0.230718	Up
CL6054Contig1	467.582	235.52	699.643	2.97063	1.57077	0.0102879	0.422517	Up	gi|45383181|ref|NP_989823.1|receptor-type tyrosine-protein phosphatase U precursor [Gallus gallus] >gi|82239545|sp|Q6YI48.1|PTPRU_CHICK RecName: Full=Receptor-type tyrosine-protein phosphatase U; Short=R-PTP-U; AltName: Full=Receptor-type protein-tyrosine phosphatase psi; Short=R-PTP-psi; Short=cRPTPPSI; Flags: Precursor >gi|37722019|gb|AAN38300.1| receptor tyrosine phosphatase [Gallus gallus]	0	sp|Q6YI48|PTPRU_CHICK	0	Receptor-type tyrosine-protein phosphatase U OS=Gallus gallus GN=PTPRU PE=2 SV=1	KOG4228	0	Protein tyrosine phosphatase		GO:0035335;GO:0016021;GO:0008013;GO:0030336;GO:0034394;GO:0034109;GO:0008285;GO:0004725;GO:0005911;GO:0030154;GO:0060070;GO:0005886	peptidyl-tyrosine dephosphorylation|integral component of membrane|beta-catenin binding|negative regulation of cell migration|protein localization to cell surface|homotypic cell-cell adhesion|negative regulation of cell proliferation|protein tyrosine phosphatase activity|cell-cell junction|cell differentiation|canonical Wnt signaling pathway|plasma membrane
CL6068Contig1	33.4079	13.2067	53.609	4.05922	2.0212	0.039096	0.833789	Up
CL6094Contig1	30.2981	8.80449	51.7918	5.88243	2.55641	0.0138102	0.496422	Up
CL6098Contig1	814.589	177.19	1451.99	8.1945	3.03466	3.46145e-07	0.000164138	Up
CL6109Contig1	21.8071	0	43.6141	Inf	Inf	7.9163e-05	0.0147627	Up
CL611Contig1	559.524	331.269	787.78	2.37807	1.24979	0.0341259	0.7882	Up	gi|514704261|ref|XP_005009262.1|PREDICTED: glutathione S-transferase-like [Anas platyrhynchos] >gi|483525240|gb|EOB08918.1| Glutathione S-transferase, partial [Anas platyrhynchos]	3.25514e-105	sp|Q08393|GSTA2_CHICK	1e-107	Glutathione S-transferase OS=Gallus gallus PE=2 SV=2	KOG1695	6e-83	Glutathione S-transferase	ko05204, Chemical carcinogenesis;ko00480, Glutathione metabolism;ko00980, Metabolism of xenobiotics by cytochrome P450;ko00982, Drug metabolism - cytochrome P450;	GO:0005737;GO:0006749;GO:0004364	cytoplasm|glutathione metabolic process|glutathione transferase activity
CL6128Contig1	81.8786	22.0112	141.746	6.43971	2.687	0.00176281	0.138686	Up	gi|514744260|ref|XP_005019157.1|PREDICTED: EH domain-binding protein 1 isoform X3 [Anas platyrhynchos]	9.92537e-09
CL6149Contig1	22.9331	7.70393	38.1624	4.95362	2.30848	0.0387138	0.828774	Up
CL6180Contig1	16.1889	3.30168	29.0761	8.80644	3.13856	0.0210567	0.635901	Up
CL6261Contig1	104.434	46.2236	162.644	3.51865	1.81502	0.0217562	0.641504	Up
CL6275Contig1	1434.91	882.65	1987.17	2.25137	1.1708	0.0237124	0.657819	Up	gi|342674158|gb|AEL31286.1|interleukin 2 receptor alpha [Anser cygnoides]	1.72211e-111	sp|O62802|IL2RA_CANFA	5e-12	Interleukin-2 receptor subunit alpha OS=Canis familiaris GN=IL2RA PE=2 SV=1				ko04144, Endocytosis;ko04151, PI3K-Akt signaling pathway;ko04630, Jak-STAT signaling pathway;ko04060, Cytokine-cytokine receptor interaction;ko05162, Measles;ko05166, HTLV-I infection;ko04640, Hematopoietic cell lineage;
CL6322Contig1	19.8234	3.30168	36.3451	11.0081	3.46049	0.00732023	0.353084	Up	gi|483502286|gb|EOA95516.1|hypothetical protein Anapl_16478 [Anas platyrhynchos]	2.6284e-15
CL6350Contig1	296.882	163.984	429.781	2.62088	1.39005	0.0348757	0.798886	Up	gi|543746309|ref|XP_005513938.1|PREDICTED: C-type lectin domain family 2 member D-like isoform X1 [Columba livia] >gi|543746311|ref|XP_005513939.1| PREDICTED: C-type lectin domain family 2 member D-like isoform X2 [Columba livia] >gi|543746313|ref|XP_005513940.1| PREDICTED: C-type lectin domain family 2 member D-like isoform X3 [Columba livia] >gi|543746315|ref|XP_005513941.1| PREDICTED: C-type l…	1.3205e-24	sp|Q8VI21|CLC2F_MOUSE	1e-09	C-type lectin domain family 2 member F OS=Mus musculus GN=Clec2f PE=3 SV=1					GO:0030246	carbohydrate binding
CL6357Contig1	51.0812	23.1118	79.0506	3.42036	1.77415	0.0455153	0.885449	Up
CL6455Contig1	12.9127	2.20112	23.6243	10.7329	3.42396	0.026747	0.70668	Up
CL6461Contig1	11.9081	1.10056	22.7157	20.6401	4.36738	0.0141131	0.496422	Up
CL647Contig1	69.0363	15.4079	122.665	7.96118	2.99298	0.000904114	0.0878717	Up
CL6495Contig1	26.7596	9.90505	43.6141	4.40322	2.13856	0.0417805	0.854721	Up
CL6554Contig1	33.4079	13.2067	53.609	4.05922	2.0212	0.039096	0.833789	Up
CL659Contig2	29.4599	4.40224	54.5177	12.3841	3.63041	0.00146331	0.123416	Up
CL659Contig3	35.6284	2.20112	69.0557	31.373	4.97145	5.47187e-05	0.0110648	Up
CL6611Contig1	19.7274	2.20112	37.2537	16.9249	4.08107	0.00300097	0.196236	Up
CL6640Contig1	26.2093	8.80449	43.6141	4.95362	2.30848	0.0306424	0.751436	Up
CL6643Contig1	20.4441	0	40.8882	Inf	Inf	0.000124094	0.0208972	Up
CL6653Contig1	15.2803	3.30168	27.2588	8.25604	3.04545	0.0276849	0.71455	Up
CL6697Contig1	15.5426	1.10056	29.9847	27.2449	4.76792	0.00369474	0.227983	Up
CL6812Contig1	1681.47	1089.56	2273.39	2.08653	1.0611	0.0366877	0.804703	Up	gi|514725425|ref|XP_005014924.1|PREDICTED: embigin [Anas platyrhynchos]	1.0134e-121	sp|Q6PCB8|EMB_HUMAN	2e-36	Embigin OS=Homo sapiens GN=EMB PE=1 SV=1
CL6827Contig1	58.9709	19.8101	98.1318	4.95362	2.30848	0.00936724	0.400838	Up
CL6862Contig1	25.9214	5.5028	46.34	8.42116	3.07402	0.00663518	0.331006	Up
CL6866Contig1	15.4467	0	30.8933	Inf	Inf	0.000748123	0.0771901	Up	gi|513240153|ref|XP_004950930.1|PREDICTED: envelope glycoprotein gp95-like [Gallus gallus]	3.8987e-11	sp|P03396|ENV_RSVP	3e-06	Envelope glycoprotein gp95 OS=Rous sarcoma virus (strain Prague C) GN=env PE=1 SV=1
CL691Contig1	73.3681	28.6146	118.122	4.12802	2.04545	0.015698	0.531521	Up
CL6944Contig1	23.9377	8.80449	39.071	4.43762	2.14979	0.0486141	0.921153	Up
CL6950Contig1	53.3528	23.1118	83.5937	3.61693	1.85477	0.0358104	0.80068	Up
CL6958Contig1	24.3921	8.80449	39.9796	4.54082	2.18295	0.0442854	0.878852	Up	gi|483512654|gb|EOB01060.1|hypothetical protein Anapl_00356 [Anas platyrhynchos]	1.96274e-12
CL6965Contig1	29.3895	8.80449	49.9745	5.67603	2.50488	0.0164192	0.545693	Up
CL6993Contig1	31.3732	5.5028	57.2435	10.4026	3.37887	0.00203087	0.152621	Up
CL6998Contig1	42.7055	0	85.411	Inf	Inf	4.55488e-07	0.000202958	Up
CL7019Contig1	274.02	151.877	396.162	2.60843	1.38318	0.0384719	0.827488	Up
CL7074Contig1	26.2093	8.80449	43.6141	4.95362	2.30848	0.0306424	0.751436	Up
CL7076Contig1	31.0403	12.1062	49.9745	4.12802	2.04545	0.0408928	0.848713	Up
CL7079Contig1	23.17	0	46.34	Inf	Inf	5.13281e-05	0.0106355	Up
CL7105Contig1	159.393	82.5421	236.243	2.86209	1.51707	0.0389953	0.833737	Up
CL7147Contig1	1781.08	840.829	2721.34	3.2365	1.69443	0.000959897	0.0915374	Up	gi|483501832|gb|EOA95287.1|hypothetical protein Anapl_07059 [Anas platyrhynchos]	2.07842e-08
CL7163Contig1	18.8188	2.20112	35.4365	16.0993	4.00892	0.00395139	0.238271	Up
CL7229Contig1	41.8479	11.0056	72.6902	6.60483	2.72352	0.00496057	0.277831	Up
CL7305Contig1	132.595	25.3129	239.878	9.4765	3.24435	7.56506e-05	0.014213	Up	gi|514720385|ref|XP_005013732.1|PREDICTED: adenosine receptor A3 [Anas platyrhynchos]	3.7406e-160	sp|P33765|AA3R_HUMAN	4e-123	Adenosine receptor A3 OS=Homo sapiens GN=ADORA3 PE=2 SV=2	KOG3656	9e-124	FOG: 7 transmembrane receptor	ko04022, cGMP - PKG signaling pathway;ko04080, Neuroactive ligand-receptor interaction;	GO:0016021;GO:0001609;GO:0001973	integral component of membrane|G-protein coupled adenosine receptor activity|adenosine receptor signaling pathway
CL7324Contig1	60.6473	28.6146	92.68	3.23891	1.69551	0.0487147	0.921153	Up
CL7330Contig1	30.9444	11.0056	50.8831	4.62338	2.20895	0.0287559	0.722571	Up	gi|113206074|ref|NP_001038104.1|interphotoreceptor matrix proteoglycan 2 precursor [Gallus gallus] >gi|123915857|sp|Q1XI86.1|IMPG2_CHICK RecName: Full=Interphotoreceptor matrix proteoglycan 2; AltName: Full=Sialoprotein associated with cones and rods proteoglycan; Short=Spacrcan; Flags: Precursor >gi|90990973|dbj|BAE92938.1| SPACRCAN [Gallus gallus]	0	sp|Q1XI86|IMPG2_CHICK	0	Interphotoreceptor matrix proteoglycan 2 OS=Gallus gallus GN=IMPG2 PE=1 SV=1	KOG3714	2e-07	Meprin A metalloprotease		GO:0016021;GO:0008201;GO:0005540	integral component of membrane|heparin binding|hyaluronic acid binding
CL7360Contig1	200.55	23.1118	377.989	16.3548	4.03164	5.25161e-07	0.000226003	Up	gi|514740125|ref|XP_005018199.1|PREDICTED: polypeptide N-acetylgalactosaminyltransferase 9, partial [Anas platyrhynchos]	0	sp|Q9HCQ5|GALT9_HUMAN	0	Polypeptide N-acetylgalactosaminyltransferase 9 OS=Homo sapiens GN=GALNT9 PE=2 SV=3	KOG3736	0	Polypeptide N-acetylgalactosaminyltransferase	ko00512, Mucin type O-glycan biosynthesis;	GO:0000139;GO:0004653;GO:0006493;GO:0046872;GO:0016021	Golgi membrane|polypeptide N-acetylgalactosaminyltransferase activity|protein O-linked glycosylation|metal ion binding|integral component of membrane
CL7369Contig1	623.89	319.163	928.617	2.90954	1.54079	0.00838563	0.383878	Up
CL7457Contig1	18.1021	4.40224	31.802	7.22404	2.85281	0.0244981	0.666399	Up
CL7508Contig1	40.9648	16.5084	65.4212	3.9629	1.98656	0.0332108	0.777692	Up
CL7522Contig1	21.0199	6.60337	35.4365	5.36643	2.42396	0.0367581	0.804998	Up	gi|541983777|ref|XP_005443751.1|PREDICTED: claudin-1 [Falco cherrug]	7.21176e-109	sp|Q6L708|CLD1_BOVIN	4e-112	Claudin-1 OS=Bos taurus GN=CLDN1 PE=2 SV=1				ko04530, Tight junction;ko04514, Cell adhesion molecules (CAMs);ko05160, Hepatitis C;ko04670, Leukocyte transendothelial migration;	GO:0042802;GO:0005923;GO:0016324;GO:0045216;GO:0016021;GO:0005198;GO:0016338	identical protein binding|tight junction|apical plasma membrane|cell-cell junction organization|integral component of membrane|structural molecule activity|calcium-independent cell-cell adhesion
CL7563Contig1	20.1817	2.20112	38.1624	17.3377	4.11584	0.00262034	0.182233	Up
CL7580Contig1	58.9965	25.3129	92.68	3.66137	1.87239	0.0313825	0.759334	Up	gi|527266159|ref|XP_005151259.1|PREDICTED: LOW QUALITY PROTEIN: LIM/homeobox protein Lhx8 [Melopsittacus undulatus]	0	sp|Q68G74|LHX8_HUMAN	0	LIM/homeobox protein Lhx8 OS=Homo sapiens GN=LHX8 PE=2 SV=2	KOG0490	2e-130	Transcription factor, contains HOX domain		GO:0042475;GO:0008270;GO:0008585;GO:0007611;GO:0006355;GO:0043565;GO:0003700;GO:0005634;GO:0021884	odontogenesis of dentin-containing tooth|zinc ion binding|female gonad development|learning or memory|regulation of transcription, DNA-templated|sequence-specific DNA binding|sequence-specific DNA binding transcription factor activity|nucleus|forebrain neuron development
CL7598Contig1	7.26902	0	14.538	Inf	Inf	0.0280724	0.71455	Up
CL7617Contig1	1215.98	794.605	1637.35	2.06058	1.04305	0.0475242	0.908463	Up	gi|514717344|ref|XP_005013008.1|PREDICTED: mitogen-activated protein kinase kinase kinase 8 isoform X1 [Anas platyrhynchos] >gi|514717348|ref|XP_005013009.1| PREDICTED: mitogen-activated protein kinase kinase kinase 8 isoform X2 [Anas platyrhynchos]	0	sp|P41279|M3K8_HUMAN	4e-157	Mitogen-activated protein kinase kinase kinase 8 OS=Homo sapiens GN=MAP3K8 PE=1 SV=2	KOG0201	9e-158	Serine/threonine protein kinase	ko04010, MAPK signaling pathway;ko04668, TNF signaling pathway;ko04620, Toll-like receptor signaling pathway;ko04660, T cell receptor signaling pathway;	GO:0006468;GO:0005524;GO:0004674	protein phosphorylation|ATP binding|protein serine/threonine kinase activity
CL7630Contig1	34.9372	9.90505	59.9694	6.05443	2.59799	0.00951063	0.40411	Up
CL7660Contig1	2668.47	1472.55	3864.39	2.62429	1.39192	0.00473681	0.272408	Up	gi|543728833|ref|XP_005505493.1|PREDICTED: guanine nucleotide exchange factor DBS isoform X4 [Columba livia]	0	sp|O15068|MCF2L_HUMAN	0	Guanine nucleotide exchange factor DBS OS=Homo sapiens GN=MCF2L PE=1 SV=2	KOG4240	0	Multidomain protein, contains SPEC repeats, PH, SH3, and separate rac-specific and rho-specific guanine nucleotide exchange factor domains		GO:0035023;GO:0005543;GO:0035556;GO:0005089	regulation of Rho protein signal transduction|phospholipid binding|intracellular signal transduction|Rho guanyl-nucleotide exchange factor activity
CL768Contig1	63.0148	29.7151	96.3145	3.24126	1.69655	0.047241	0.904428	Up
CL7690Contig1	22.0245	7.70393	36.3451	4.71774	2.2381	0.0472413	0.904428	Up
CL7786Contig1	30.5605	6.60337	54.5177	8.25604	3.04545	0.00455387	0.263554	Up
CL7794Contig1	62.6953	0	125.391	Inf	Inf	1.98679e-08	1.44981e-05	Up
CL7870Contig1	20.0153	5.5028	34.5278	6.27459	2.64952	0.0273481	0.713473	Up
CL7905Contig1	51.7019	19.8101	83.5937	4.21975	2.07716	0.0206185	0.628077	Up
CL7925Contig1	76.5228	23.1118	129.934	5.62197	2.49108	0.00376376	0.230718	Up
CL7952Contig1	58.8239	7.70393	109.944	14.2712	3.83503	0.000102794	0.0180341	Up
CL7965Contig1	30.3941	9.90505	50.8831	5.13709	2.36095	0.0211816	0.637987	Up
CL79Contig1	120.943	1.10056	240.786	218.785	7.77337	2.15888e-10	2.71755e-07	Up
CL8038Contig1	32.5697	8.80449	56.3349	6.39843	2.67772	0.00905723	0.397564	Up	gi|514704678|ref|XP_005009465.1|PREDICTED: EMILIN-2 [Anas platyrhynchos]	0	sp|Q9BXX0|EMIL2_HUMAN	8e-118	EMILIN-2 OS=Homo sapiens GN=EMILIN2 PE=1 SV=3					GO:0005576	extracellular region
CL8041Contig1	19.561	5.5028	33.6192	6.10947	2.61105	0.0306538	0.751436	Up
CL8048Contig1	48.4962	14.3073	82.6851	5.77923	2.53088	0.00652197	0.329146	Up
CL806Contig1	55.8612	15.4079	96.3145	6.251	2.64409	0.00381596	0.23177	Up
CL8135Contig1	45.8408	9.90505	81.7765	8.25604	3.04545	0.00175523	0.138376	Up
CL825Contig1	27.2843	5.5028	49.0659	8.91652	3.15648	0.00487879	0.276991	Up
CL825Contig2	13.1751	0	26.3502	Inf	Inf	0.00184436	0.142213	Up
CL8261Contig1	25.851	9.90505	41.7969	4.21975	2.07716	0.0497488	0.929651	Up
CL8267Contig1	32.9536	13.2067	52.7004	3.99042	1.99654	0.0420307	0.854721	Up
CL8333Contig1	21.7366	4.40224	39.071	8.87524	3.14979	0.00934127	0.400838	Up
CL8353Contig1	83.1394	0	166.279	Inf	Inf	1.39486e-09	1.35063e-06	Up
CL8427Contig1	129.997	52.8269	207.167	3.92162	1.97145	0.0104509	0.426774	Up
CL8440Contig1	20.8984	0	41.7969	Inf	Inf	0.000106629	0.0185134	Up
CL8448Contig1	51.2476	19.8101	82.6851	4.17389	2.06139	0.0216968	0.641504	Up
CL8463Contig1	830.377	446.828	1213.93	2.71677	1.44189	0.0098646	0.414601	Up	gi|483522573|gb|EOB07232.1|Connector enhancer of kinase suppressor of ras 2, partial [Anas platyrhynchos]	0	sp|Q8WXI2|CNKR2_HUMAN	1e-81	Connector enhancer of kinase suppressor of ras 2 OS=Homo sapiens GN=CNKSR2 PE=1 SV=1	KOG1738	1e-37	Membrane-associated guanylate kinase-interacting protein/connector enhancer of KSR-like
CL8476Contig1	41.3231	15.4079	67.2384	4.36391	2.12562	0.0233949	0.65306	Up
CL8478Contig1	37.2343	15.4079	59.0608	3.83316	1.93853	0.0413498	0.851187	Up
CL8666Contig1	15.7346	3.30168	28.1675	8.53124	3.09276	0.0241338	0.662986	Up
CL8680Contig1	16.9056	1.10056	32.7106	29.7217	4.89345	0.0023032	0.164261	Up
CL870Contig1	24.8464	8.80449	40.8882	4.64402	2.21538	0.0403607	0.846811	Up	gi|514729964|ref|XP_005016010.1|PREDICTED: brain-specific angiogenesis inhibitor 1-associated protein 2-like protein 2, partial [Anas platyrhynchos]	3.35411e-100	sp|Q6UXY1|BI2L2_HUMAN	4e-112	Brain-specific angiogenesis inhibitor 1-associated protein 2-like protein 2 OS=Homo sapiens GN=BAIAP2L2 PE=1 SV=1					GO:0071439;GO:0005543;GO:0012506;GO:0046847;GO:0007165;GO:0044291;GO:0017124;GO:0008093	clathrin complex|phospholipid binding|vesicle membrane|filopodium assembly|signal transduction|cell-cell contact zone|SH3 domain binding|cytoskeletal adaptor activity
CL8711Contig1	2747.47	716.465	4778.47	6.66951	2.73758	1.08158e-07	6.05096e-05	Up	gi|541983205|ref|XP_005443552.1|PREDICTED: uncharacterized protein LOC102053191 [Falco cherrug]	8.6908e-90	sp|P21415|ENV_GALV	2e-76	Envelope glycoprotein OS=Gibbon ape leukemia virus GN=env PE=2 SV=2	KOG0017	6e-43	FOG: Transposon-encoded proteins with TYA, reverse transcriptase, integrase domains in various combinations
CL8744Contig1	19.561	5.5028	33.6192	6.10947	2.61105	0.0306538	0.751436	Up
CL8763Contig1	28.9352	8.80449	49.0659	5.57283	2.47841	0.0179192	0.577254	Up
CL8789Contig1	17.0015	2.20112	31.802	14.4481	3.85281	0.00695631	0.342048	Up
CL8909Contig1	12.2665	0	24.5329	Inf	Inf	0.00269957	0.184181	Up
CL893Contig1	65.1649	23.1118	107.218	4.63911	2.21385	0.0109375	0.438815	Up	gi|483512654|gb|EOB01060.1|hypothetical protein Anapl_00356 [Anas platyrhynchos]	2.31074e-10
CL901Contig1	70.6167	23.1118	118.122	5.11088	2.35357	0.0065082	0.329146	Up	gi|514737597|ref|XP_005017599.1|PREDICTED: kalirin [Anas platyrhynchos]	0	sp|P97924|KALRN_RAT	0	Kalirin OS=Rattus norvegicus GN=Kalrn PE=1 SV=3	KOG4240	0	Multidomain protein, contains SPEC repeats, PH, SH3, and separate rac-specific and rho-specific guanine nucleotide exchange factor domains
CL9033Contig1	11.3578	0	22.7157	Inf	Inf	0.00400164	0.238728	Up
CL903Contig1	304.331	124.363	484.298	3.89422	1.96133	0.0033251	0.210574	Up
CL9041Contig1	15.901	0	31.802	Inf	Inf	0.000629023	0.0691796	Up	gi|18027726|gb|AAL55824.1|AF318317_1unknown [Homo sapiens]	1.27143e-16	sp|Q69566|U88_HHV6U	1e-13	Uncharacterized protein U88 OS=Human herpesvirus 6A (strain Uganda-1102) GN=U88 PE=4 SV=1	KOG0120	3e-07	Splicing factor U2AF, large subunit (RRM superfamily)		GO:0005829;GO:0043304;GO:0042582;GO:0030348;GO:0070062;GO:0001909;GO:0017075;GO:0044194;GO:0042581;GO:0070820;GO:0016324;GO:0043312;GO:0031201;GO:0006904;GO:0015031	cytosol|regulation of mast cell degranulation|azurophil granule|syntaxin-3 binding|extracellular vesicular exosome|leukocyte mediated cytotoxicity|syntaxin-1 binding|cytolytic granule|specific granule|tertiary granule|apical plasma membrane|neutrophil degranulation|SNARE complex|vesicle docking involved in exocytosis|protein transport
CL9097Contig1	26.2093	8.80449	43.6141	4.95362	2.30848	0.0306424	0.751436	Up
CL9112Contig1	25.0832	1.10056	49.0659	44.5826	5.47841	0.000181774	0.0278191	Up
CL9179Contig1	30.1317	12.1062	48.1573	3.97791	1.99201	0.047714	0.911053	Up
CL9255Contig1	42.2512	0	84.5024	Inf	Inf	4.9562e-07	0.000217	Up	gi|558146906|ref|XP_006119779.1|PREDICTED: uncharacterized protein LOC102458987 [Pelodiscus sinensis]	1.301e-15	sp|P03355|POL_MLVMS	1e-24	Gag-Pol polyprotein OS=Moloney murine leukemia virus (isolate Shinnick) GN=gag-pol PE=1 SV=4	KOG0017	4e-09	FOG: Transposon-encoded proteins with TYA, reverse transcriptase, integrase domains in various combinations		GO:0046718;GO:0019013;GO:0090305;GO:0039660;GO:0003723;GO:0006310;GO:0008270;GO:0019048;GO:0006278;GO:0019068;GO:0019076;GO:0003964;GO:0004523;GO:0003677;GO:0006508;GO:0075713;GO:0004190;GO:0020002;GO:0015074;GO:0016020	viral entry into host cell|viral nucleocapsid|nucleic acid phosphodiester bond hydrolysis|structural constituent of virion|RNA binding|DNA recombination|zinc ion binding|modulation by virus of host morphology or physiology|RNA-dependent DNA replication|virion assembly|viral release from host cell|RNA-directed DNA polymerase activity|RNA-DNA hybrid ribonuclease activity|DNA binding|proteolysis|est…
CL9266Contig1	8.63196	0	17.2639	Inf	Inf	0.0141475	0.496422	Up
CL932Contig1	849.246	538.174	1160.32	2.15603	1.10837	0.0448821	0.883792	Up	gi|543339073|ref|XP_005516399.1|PREDICTED: WD repeat and FYVE domain-containing protein 2 [Pseudopodoces humilis]	1.15965e-154	sp|Q96P53|WDFY2_HUMAN	2e-165	WD repeat and FYVE domain-containing protein 2 OS=Homo sapiens GN=WDFY2 PE=2 SV=2	KOG1409	4e-166	Uncharacterized conserved protein, contains WD40 repeats and FYVE domains		GO:0046872	metal ion binding
CL9341Contig1	2003.52	1057.64	2949.41	2.78867	1.47958	0.00336347	0.212223	Up	gi|525017266|ref|XP_005056190.1|PREDICTED: E3 ubiquitin-protein ligase RNF135 [Ficedula albicollis]	3.68164e-99	sp|Q8IUD6|RN135_HUMAN	3e-39	E3 ubiquitin-protein ligase RNF135 OS=Homo sapiens GN=RNF135 PE=1 SV=2	KOG2177	3e-22	Predicted E3 ubiquitin ligase		GO:0005737;GO:0004842;GO:0016567;GO:0045088;GO:0043021;GO:0008270;GO:0032728	cytoplasm|ubiquitin-protein transferase activity|protein ubiquitination|regulation of innate immune response|ribonucleoprotein complex binding|zinc ion binding|positive regulation of interferon-beta production
CL9436Contig1	36.3257	15.4079	57.2435	3.71522	1.89345	0.0471164	0.903755	Up
CL9439Contig1	18.1726	0	36.3451	Inf	Inf	0.000272578	0.0366967	Up
CL9443Contig1	38.5973	15.4079	61.7867	4.01008	2.00363	0.0340887	0.7877	Up
CL9454Contig1	32.1154	8.80449	55.4263	6.29523	2.65426	0.00984223	0.414294	Up
CL9516Contig1	61.8122	5.5028	118.122	21.4657	4.42396	1.70809e-05	0.00425762	Up
CL9575Contig1	15.6386	2.20112	29.0761	13.2097	3.72352	0.0107721	0.432868	Up	gi|483525046|gb|EOB08797.1|EMILIN-2, partial [Anas platyrhynchos]	1.6875e-125	sp|Q9BXX0|EMIL2_HUMAN	3e-53	EMILIN-2 OS=Homo sapiens GN=EMILIN2 PE=1 SV=3					GO:0005576	extracellular region
CL9614Contig1	30.439	0	60.878	Inf	Inf	6.5535e-06	0.0019759	Up
CL9631Contig1	19.0812	0	38.1624	Inf	Inf	0.000197827	0.0290402	Up
CL9635Contig1	15.1843	2.20112	28.1675	12.7969	3.67772	0.0124928	0.466288	Up	gi|483525143|gb|EOB08859.1|Down syndrome cell adhesion molecule, partial [Anas platyrhynchos]	0	sp|Q8VHZ8|DSCAM_RAT	0	Down syndrome cell adhesion molecule homolog OS=Rattus norvegicus GN=Dscam PE=1 SV=1	KOG3510	0	FOG: Immunoglobulin C-2 Type/fibronectin type III domains		GO:0070593;GO:0048842;GO:0030424;GO:0060060;GO:0007626;GO:0007162;GO:0042327;GO:0030426;GO:0048813;GO:0005886	dendrite self-avoidance|positive regulation of axon extension involved in axon guidance|axon|post-embryonic retina morphogenesis in camera-type eye|locomotory behavior|negative regulation of cell adhesion|positive regulation of phosphorylation|growth cone|dendrite morphogenesis|plasma membrane
CL9665Contig1	24.8208	3.30168	46.34	14.0353	3.81098	0.0019115	0.145112	Up
CL9696Contig1	14.8259	3.30168	26.3502	7.98084	2.99654	0.0317853	0.760062	Up
CL9707Contig1	14.1797	1.10056	27.2588	24.7681	4.63041	0.00601423	0.315164	Up
CL9736Contig1	20.4441	0	40.8882	Inf	Inf	0.000124094	0.0208972	Up	gi|449276629|gb|EMC85071.1|hypothetical protein A306_06538 [Columba livia]	7.35087e-08
CL978Contig1	88.8148	28.6146	149.015	5.20766	2.38063	0.00425847	0.250488	Up
CL9852Contig1	34.4125	14.3073	54.5177	3.81048	1.92997	0.0461802	0.890888	Up
CL9862Contig1	20.8984	0	41.7969	Inf	Inf	0.000106629	0.0185134	Up
CL9966Contig1	41.5855	13.2067	69.9643	5.29763	2.40535	0.0114466	0.444714	Up
comp107414_c0_seq1	10.9035	0	21.8071	Inf	Inf	0.00489571	0.276991	Up
comp108955_c0_seq1	9.08628	0	18.1726	Inf	Inf	0.0113559	0.443242	Up
comp114417_c0_seq1	10.5452	1.10056	19.9898	18.1633	4.18295	0.0241683	0.662986	Up
comp115344_c0_seq1	7.72333	0	15.4467	Inf	Inf	0.0222382	0.642775	Up
comp118997_c0_seq1	12.8168	1.10056	24.5329	22.2913	4.47841	0.00996805	0.417081	Up	gi|556098730|gb|ESO87382.1|hypothetical protein LOTGIDRAFT_166530 [Lottia gigantea]	3.55167e-06
comp121783_c0_seq1	17.2639	0	34.5278	Inf	Inf	0.000378551	0.0471793	Up
comp125775_c0_seq1	9.08628	0	18.1726	Inf	Inf	0.0113559	0.443242	Up
comp125956_c0_seq1	7.72333	0	15.4467	Inf	Inf	0.0222382	0.642775	Up
comp127205_c0_seq1	6.81471	0	13.6294	Inf	Inf	0.0356133	0.798886	Up
comp129017_c0_seq1	9.54059	0	19.0812	Inf	Inf	0.00915128	0.397564	Up
comp13024_c0_seq1	6.81471	0	13.6294	Inf	Inf	0.0356133	0.798886	Up
comp133947_c0_seq1	17.9102	2.20112	33.6192	15.2737	3.93298	0.00522954	0.286886	Up
comp135475_c0_seq1	13.1751	0	26.3502	Inf	Inf	0.00184436	0.142213	Up
comp136776_c0_seq1	18.5564	4.40224	32.7106	7.43044	2.89345	0.0216536	0.641504	Up
comp137561_c0_seq1	13.463	3.30168	23.6243	7.15524	2.839	0.0483853	0.9183	Up
comp139028_c0_seq1	6.81471	0	13.6294	Inf	Inf	0.0356133	0.798886	Up
comp142208_c0_seq1	8.17765	0	16.3553	Inf	Inf	0.0176986	0.572712	Up
comp144715_c0_seq1	13.6294	0	27.2588	Inf	Inf	0.0015314	0.125993	Up
comp14489_c0_seq1	12.9127	2.20112	23.6243	10.7329	3.42396	0.026747	0.70668	Up
comp146036_c0_seq1	7.26902	0	14.538	Inf	Inf	0.0280724	0.71455	Up
comp149738_c0_seq1	9.9949	0	19.9898	Inf	Inf	0.0074025	0.353084	Up
comp15494_c0_seq1	15.4467	0	30.8933	Inf	Inf	0.000748123	0.0771901	Up
comp155496_c0_seq1	10.4492	0	20.8984	Inf	Inf	0.00600958	0.315164	Up
comp156956_c0_seq1	8.17765	0	16.3553	Inf	Inf	0.0176986	0.572712	Up
comp163021_c0_seq1	8.17765	0	16.3553	Inf	Inf	0.0176986	0.572712	Up
comp164104_c0_seq1	7.26902	0	14.538	Inf	Inf	0.0280724	0.71455	Up
comp165631_c0_seq1	6.36039	0	12.7208	Inf	Inf	0.0454118	0.885449	Up	gi|449274231|gb|EMC83514.1|Cadherin-4, partial [Columba livia]	6.28957e-53	sp|Q63149|CADH4_RAT	2e-69	Cadherin-4 (Fragment) OS=Rattus norvegicus GN=Cdh4 PE=2 SV=1	KOG3594	2e-64	FOG: Cadherin repeats		GO:0007411;GO:0005509;GO:0007156;GO:0007157;GO:0005887;GO:0045773	axon guidance|calcium ion binding|homophilic cell adhesion|heterophilic cell-cell adhesion|integral component of plasma membrane|positive regulation of axon extension
comp17418_c0_seq1	8.63196	0	17.2639	Inf	Inf	0.0141475	0.496422	Up
comp178640_c0_seq1	6.36039	0	12.7208	Inf	Inf	0.0454118	0.885449	Up
comp183891_c0_seq1	7.72333	0	15.4467	Inf	Inf	0.0222382	0.642775	Up
comp21477_c0_seq1	18.6269	0	37.2537	Inf	Inf	0.000231987	0.0329036	Up
comp23789_c0_seq1	2195.65	1322.87	3068.44	2.31952	1.21383	0.0146909	0.510491	Up
comp2387_c0_seq1	6.36039	0	12.7208	Inf	Inf	0.0454118	0.885449	Up
comp26071_c0_seq1	7.26902	0	14.538	Inf	Inf	0.0280724	0.71455	Up
comp28175_c0_seq1	31.1812	3.30168	59.0608	17.8881	4.16093	0.000418922	0.0509496	Up
comp29512_c0_seq1	16.3553	0	32.7106	Inf	Inf	0.000529983	0.0606482	Up
comp30830_c0_seq1	12.7208	0	25.4416	Inf	Inf	0.00222793	0.160484	Up
comp31582_c1_seq1	9.08628	0	18.1726	Inf	Inf	0.0113559	0.443242	Up
comp32845_c0_seq1	19.1067	5.5028	32.7106	5.94435	2.57152	0.0343813	0.790833	Up
comp33364_c0_seq1	6.36039	0	12.7208	Inf	Inf	0.0454118	0.885449	Up
comp34609_c0_seq1	8.17765	0	16.3553	Inf	Inf	0.0176986	0.572712	Up
comp34824_c0_seq1	27.6682	9.90505	45.4314	4.58669	2.19745	0.0351513	0.798886	Up	gi|483513930|gb|EOB01802.1|Echinoderm microtubule-associated protein-like 5-like, partial [Anas platyrhynchos]	8.974e-138	sp|Q6ZMW3|EMAL6_HUMAN	2e-149	Echinoderm microtubule-associated protein-like 6 OS=Homo sapiens GN=EML6 PE=2 SV=2	KOG2106	1e-121	Uncharacterized conserved protein, contains HELP and WD40 domains
comp36933_c0_seq1	25.851	9.90505	41.7969	4.21975	2.07716	0.0497488	0.929651	Up
comp39379_c0_seq1	10.9035	0	21.8071	Inf	Inf	0.00489571	0.276991	Up	gi|514767997|ref|XP_005024824.1|PREDICTED: histone deacetylase 4 isoform X3 [Anas platyrhynchos]	1.35036e-17	sp|P83038|HDAC4_CHICK	6e-21	Histone deacetylase 4 OS=Gallus gallus GN=HDAC4 PE=2 SV=1	KOG1343	1e-15	Histone deacetylase complex, catalytic component HDA1		GO:0033613;GO:0006954;GO:0070491;GO:0070555;GO:0008284;GO:0070933;GO:0001501;GO:0014894;GO:0051091;GO:0030955;GO:0070932;GO:0097372;GO:0031594;GO:0006351;GO:0000118;GO:0005829;GO:0045668;GO:0043433;GO:0010882;GO:0046969;GO:0003714;GO:0044212;GO:0045944;GO:0007399;GO:0032041;GO:0008270;GO:0043393;GO:0000122;GO:0030183;GO:0034983;GO:0045843;GO:0008285;GO:0019901;GO:0042641;GO:0043565;GO:0010832;GO:…	activating transcription factor binding|inflammatory response|repressing transcription factor binding|response to interleukin-1|positive regulation of cell proliferation|histone H4 deacetylation|skeletal system development|response to denervation involved in regulation of muscle adaptation|positive regulation of sequence-specific DNA binding transcription factor activity|potassium ion binding|his…
comp40033_c0_seq1	9.54059	0	19.0812	Inf	Inf	0.00915128	0.397564	Up	gi|32812298|gb|AAP88020.1|AF355752_1reverse transcriptase [Chelonia mydas]	1.47971e-14				KOG1075	5e-07	FOG: Reverse transcriptase
comp41798_c0_seq1	99.4947	0	198.989	Inf	Inf	2.07381e-10	2.67739e-07	Up	gi|514756423|ref|XP_005022074.1|PREDICTED: uncharacterized protein LOC101791992 [Anas platyrhynchos]	6.08108e-06
comp42011_c0_seq1	48.2532	1.10056	95.4059	86.6884	6.43777	1.32299e-06	0.000472437	Up	gi|514790811|ref|XP_005030076.1|PREDICTED: EF-hand domain-containing family member B, partial [Anas platyrhynchos]	6.85854e-153	sp|Q8N7U6|EFHB_HUMAN	2e-120	EF-hand domain-containing family member B OS=Homo sapiens GN=EFHB PE=2 SV=4					GO:0005509	calcium ion binding
comp42059_c1_seq1	93.4344	45.123	141.746	3.14132	1.65137	0.0390772	0.833789	Up
comp46693_c0_seq1	12.7208	0	25.4416	Inf	Inf	0.00222793	0.160484	Up
comp46773_c0_seq1	10.9035	0	21.8071	Inf	Inf	0.00489571	0.276991	Up
comp48687_c0_seq1	10.4492	0	20.8984	Inf	Inf	0.00600958	0.315164	Up
comp49113_c0_seq1	95.3354	4.40224	186.269	42.3122	5.403	1.46086e-07	7.99521e-05	Up
comp49269_c0_seq1	28.6728	11.0056	46.34	4.21058	2.07402	0.0430331	0.863938	Up	gi|513185829|ref|XP_004941343.1|PREDICTED: T-cell differentiation antigen CD6 [Gallus gallus]	2.37679e-31	sp|Q8BV57|SRCRL_MOUSE	6e-10	Soluble scavenger receptor cysteine-rich domain-containing protein SSC5D OS=Mus musculus GN=Ssc5d PE=1 SV=1				ko04514, Cell adhesion molecules (CAMs);
comp49537_c0_seq1	7.72333	0	15.4467	Inf	Inf	0.0222382	0.642775	Up
comp49838_c0_seq1	28.6218	0	57.2435	Inf	Inf	1.05588e-05	0.00298676	Up
comp52262_c0_seq1	11.8122	0	23.6243	Inf	Inf	0.00328143	0.208879	Up
comp54685_c0_seq1	13.6294	0	27.2588	Inf	Inf	0.0015314	0.125993	Up
comp55816_c0_seq1	13.9173	3.30168	24.5329	7.43044	2.89345	0.0420163	0.854721	Up	gi|483516847|gb|EOB03547.1|hypothetical protein Anapl_02217 [Anas platyrhynchos]	3.34026e-28
comp57258_c0_seq1	8.17765	0	16.3553	Inf	Inf	0.0176986	0.572712	Up
comp57342_c0_seq1	47.0822	3.30168	90.8628	27.5201	4.78242	2.16883e-05	0.00511036	Up	gi|449278002|gb|EMC85995.1|IgA FC receptor, partial [Columba livia]	1.07705e-07	sp|Q9FPQ6|GP1_CHLRE	2e-06	Vegetative cell wall protein gp1 OS=Chlamydomonas reinhardtii GN=GP1 PE=2 SV=1
comp57632_c0_seq1	9.08628	0	18.1726	Inf	Inf	0.0113559	0.443242	Up
comp59757_c1_seq1	8.17765	0	16.3553	Inf	Inf	0.0176986	0.572712	Up
comp59820_c0_seq1	48.3492	2.20112	94.4973	42.9314	5.42396	5.60057e-06	0.00176247	Up
comp60333_c0_seq1	19.0812	0	38.1624	Inf	Inf	0.000197827	0.0290402	Up
comp62398_c0_seq3	12.7208	0	25.4416	Inf	Inf	0.00222793	0.160484	Up
comp66537_c0_seq1	44.0684	0	88.1369	Inf	Inf	3.55326e-07	0.000164138	Up
comp70712_c0_seq1	15.4467	0	30.8933	Inf	Inf	0.000748123	0.0771901	Up
comp7312_c0_seq1	7.72333	0	15.4467	Inf	Inf	0.0222382	0.642775	Up
comp73379_c0_seq2	165.823	78.1398	253.507	3.24428	1.6979	0.0208314	0.632237	Up
comp73984_c1_seq1	10.4492	0	20.8984	Inf	Inf	0.00600958	0.315164	Up
comp74633_c0_seq2	17.7182	0	35.4365	Inf	Inf	0.000320903	0.041882	Up
comp75311_c0_seq2	7.26902	0	14.538	Inf	Inf	0.0280724	0.71455	Up
comp75594_c0_seq1	93.9786	25.3129	162.644	6.42535	2.68378	0.00137109	0.117954	Up	gi|483505461|gb|EOA97032.1|hypothetical protein Anapl_17450, partial [Anas platyrhynchos]	4.99042e-09
comp77308_c0_seq1	56.1685	3.30168	109.035	33.0242	5.04545	5.69152e-06	0.00177996	Up
comp77412_c0_seq1	43.7866	17.609	69.9643	3.97322	1.99031	0.0306423	0.751436	Up	gi|529442377|ref|XP_005240916.1|PREDICTED: minor histocompatibility protein HA-1 [Falco peregrinus]	2.02113e-170	sp|Q92619|HMHA1_HUMAN	1e-109	Minor histocompatibility protein HA-1 OS=Homo sapiens GN=HMHA1 PE=1 SV=2	KOG1453	2e-110	Chimaerin and related Rho GTPase activating proteins		GO:0046872;GO:0005622;GO:0035556	metal ion binding|intracellular|intracellular signal transduction
comp78468_c1_seq1	15.0883	1.10056	29.0761	26.4193	4.72352	0.00433899	0.254333	Up	gi|514756423|ref|XP_005022074.1|PREDICTED: uncharacterized protein LOC101791992 [Anas platyrhynchos]	1.88569e-30								GO:0030246	carbohydrate binding
comp79385_c0_seq1	59.2527	2.20112	116.304	52.8387	5.72352	1.13922e-06	0.000421773	Up
comp79748_c0_seq1	30.439	0	60.878	Inf	Inf	6.5535e-06	0.0019759	Up
comp80101_c1_seq1	148.009	77.0393	218.979	2.84244	1.50713	0.0425085	0.860267	Up	gi|302857651|ref|XP_002959926.1|hypothetical protein VOLCADRAFT_39527 [Volvox carteri f. nagariensis] >gi|300253911|gb|EFJ39009.1| hypothetical protein VOLCADRAFT_39527 [Volvox carteri f. nagariensis]	3.3853e-08
comp83749_c0_seq3	90.779	40.7208	140.837	3.45861	1.79019	0.0267473	0.70668	Up	gi|260826059|ref|XP_002607983.1|hypothetical protein BRAFLDRAFT_161094 [Branchiostoma floridae] >gi|229293333|gb|EEN63993.1| hypothetical protein BRAFLDRAFT_161094 [Branchiostoma floridae]	1.2591e-06	sp|Q06002|BFSP1_BOVIN	3e-06	Filensin OS=Bos taurus GN=BFSP1 PE=1 SV=2	KOG3294	2e-06	WW domain binding protein WBP-2, contains GRAM domain
comp83964_c0_seq1	6.36039	0	12.7208	Inf	Inf	0.0454118	0.885449	Up
comp87176_c0_seq5	1305.7	646.029	1965.36	3.04222	1.60512	0.002416	0.170388	Up	gi|483522218|gb|EOB07023.1|Suppressor of IKK-epsilon, partial [Anas platyrhynchos]	1.20177e-38	sp|Q9BRV8|SIKE1_HUMAN	3e-39	Suppressor of IKBKE 1 OS=Homo sapiens GN=SIKE1 PE=1 SV=1				ko04622, RIG-I-like receptor signaling pathway;	GO:0002218;GO:0045087;GO:0005515;GO:0005925;GO:0043231;GO:0005829	activation of innate immune response|innate immune response|protein binding|focal adhesion|intracellular membrane-bounded organelle|cytosol
comp87646_c1_seq1	101.849	37.4191	166.279	4.44369	2.15176	0.00754562	0.358762	Up
comp88052_c1_seq1	26.8045	0	53.609	Inf	Inf	1.74301e-05	0.00432327	Up	gi|449495454|ref|XP_002191900.2|PREDICTED: uncharacterized protein LOC100228131 [Taeniopygia guttata]	1.41701e-22	sp|P03365|POL_MMTVB	2e-17	Pol polyprotein OS=Mouse mammary tumor virus (strain BR6) GN=pol PE=3 SV=2					GO:0019028;GO:0046718;GO:0090305;GO:0003723;GO:0006310;GO:0008270;GO:0006278;GO:0003887;GO:0003964;GO:0004523;GO:0003677;GO:0006508;GO:0075713;GO:0046080;GO:0004190;GO:0005198;GO:0015074	viral capsid|viral entry into host cell|nucleic acid phosphodiester bond hydrolysis|RNA binding|DNA recombination|zinc ion binding|RNA-dependent DNA replication|DNA-directed DNA polymerase activity|RNA-directed DNA polymerase activity|RNA-DNA hybrid ribonuclease activity|DNA binding|proteolysis|establishment of integrated proviral latency|dUTP metabolic process|aspartic-type endopeptidase activit…
comp88506_c0_seq6	255.188	107.855	402.522	3.73207	1.89998	0.00575119	0.309379	Up	gi|514786623|ref|XP_005029067.1|PREDICTED: collagen alpha-3(IX) chain isoform X1 [Anas platyrhynchos] >gi|514786627|ref|XP_005029068.1| PREDICTED: collagen alpha-3(IX) chain isoform X2 [Anas platyrhynchos] >gi|514786631|ref|XP_005029069.1| PREDICTED: collagen alpha-3(IX) chain isoform X3 [Anas platyrhynchos] >gi|514786638|ref|XP_005029070.1| PREDICTED: collagen alpha-3(IX) chain isoform X4 [Anas …	2.3325e-105	sp|P32017|CO9A3_CHICK	2e-110	Collagen alpha-3(IX) chain OS=Gallus gallus GN=COL9A3 PE=2 SV=1	KOG3544	1e-84	Collagens (type IV and type XIII), and related proteins	ko04974, Protein digestion and absorption;	GO:0005594	collagen type IX trimer
comp90792_c2_seq21	4128.48	282.844	7974.12	28.1926	4.81725	7.53997e-18	4.74556e-14	Up	gi|530565445|ref|XP_005279278.1|PREDICTED: abhydrolase domain-containing protein 1 [Chrysemys picta bellii]	4.10976e-39	sp|Q3T0A0|ABHD1_BOVIN	6e-37	Abhydrolase domain-containing protein 1 OS=Bos taurus GN=ABHD1 PE=2 SV=1	KOG1838	4e-35	Alpha/beta hydrolase		GO:0052689	carboxylic ester hydrolase activity
comp90930_c0_seq30	356.295	141.972	570.618	4.01922	2.00692	0.00203648	0.152815	Up	gi|483523226|gb|EOB07646.1|Peroxisome biogenesis factor 1, partial [Anas platyrhynchos]	0	sp|O43933|PEX1_HUMAN	0	Peroxisome biogenesis factor 1 OS=Homo sapiens GN=PEX1 PE=1 SV=1	KOG0735	0	AAA+-type ATPase	ko04146, Peroxisome;	GO:0005829;GO:0060152;GO:0016558;GO:0042623;GO:0008022;GO:0032403;GO:0005778;GO:0005524;GO:0005634	cytosol|microtubule-based peroxisome localization|protein import into peroxisome matrix|ATPase activity, coupled|protein C-terminus binding|protein complex binding|peroxisomal membrane|ATP binding|nucleus
comp91169_c1_seq23	703.278	0	1406.56	Inf	Inf	1.23172e-25	3.10091e-21	Up
comp93267_c1_seq1	39960.1	20252.5	59667.8	2.94619	1.55885	0.00660529	0.330333	Up	gi|38606553|gb|AAR25267.1|MHC class I heavy chain, partial [Anser anser]	7.42198e-162	sp|P15979|HA1F_CHICK	2e-119	Class I histocompatibility antigen, F10 alpha chain OS=Gallus gallus PE=2 SV=1				ko04144, Endocytosis;ko04145, Phagosome;ko04514, Cell adhesion molecules (CAMs);ko05203, Viral carcinogenesis;ko05416, Viral myocarditis;ko04940, Type I diabetes mellitus;ko05320, Autoimmune thyroid disease;ko05330, Allograft rejection;ko05332, Graft-versus-host disease;ko05166, HTLV-I infection;ko05168, Herpes simplex infection;ko05169, Epstein-Barr virus infection;ko04612, Antigen processing an…
comp93639_c3_seq1	9.08628	0	18.1726	Inf	Inf	0.0113559	0.443242	Up
comp93788_c0_seq13	667.554	408.308	926.8	2.26985	1.1826	0.0391207	0.83394	Up
comp94103_c2_seq1	165.6	49.5252	281.675	5.68749	2.50779	0.000968084	0.0921437	Up	gi|513240153|ref|XP_004950930.1|PREDICTED: envelope glycoprotein gp95-like [Gallus gallus]	4.36396e-74	sp|P33498|ENV_AVIR3	2e-51	Envelope glycoprotein (Fragment) OS=Avian retrovirus RPL30 GN=env PE=2 SV=1
comp94400_c0_seq1	12.2665	0	24.5329	Inf	Inf	0.00269957	0.184181	Up
comp94931_c1_seq2	158.983	72.637	245.329	3.37747	1.75594	0.0177944	0.575076	Up	gi|514781151|ref|XP_005027786.1|PREDICTED: killer cell lectin-like receptor subfamily B member 1B allele B-like isoform X1 [Anas platyrhynchos]	2.14977e-95	sp|P27811|KLRBA_MOUSE	5e-20	Killer cell lectin-like receptor subfamily B member 1A OS=Mus musculus GN=Klrb1a PE=1 SV=2	KOG4297	2e-13	C-type lectin		GO:0030246	carbohydrate binding
comp95854_c0_seq1	7.72333	0	15.4467	Inf	Inf	0.0222382	0.642775	Up
comp96469_c0_seq1	30.9444	11.0056	50.8831	4.62338	2.20895	0.0287559	0.722571	Up
comp97479_c0_seq1	11.8122	0	23.6243	Inf	Inf	0.00328143	0.208879	Up
comp98553_c0_seq1	37.708	0	75.4161	Inf	Inf	1.21503e-06	0.000443319	Up
comp99681_c0_seq1	22.8372	6.60337	39.071	5.91683	2.56482	0.024125	0.662986	Up
CL10001Contig1	4264.83	5801.06	2728.61	0.470364	-1.08815	0.0236856	0.657438	Down	gi|530578602|ref|XP_005315687.1|PREDICTED: LOW QUALITY PROTEIN: potassium channel tetramerization domain containing 12 [Chrysemys picta bellii]	1.07205e-67	sp|Q96CX2|KCD12_HUMAN	1e-63	BTB/POZ domain-containing protein KCTD12 OS=Homo sapiens GN=KCTD12 PE=1 SV=1	KOG2723	4e-64	Uncharacterized conserved protein, contains BTB/POZ domain		GO:0045211;GO:0042734;GO:0030054;GO:0043235;GO:0008277;GO:0005515;GO:0051260	postsynaptic membrane|presynaptic membrane|cell junction|receptor complex|regulation of G-protein coupled receptor protein signaling pathway|protein binding|protein homooligomerization
CL10023Contig1	1143.85	1660.75	626.953	0.377513	-1.4054	0.00854086	0.38733	Down	gi|543347021|ref|XP_005519099.1|PREDICTED: probable leucine--tRNA ligase, mitochondrial [Pseudopodoces humilis]	0	sp|Q15031|SYLM_HUMAN	0	Probable leucine--tRNA ligase, mitochondrial OS=Homo sapiens GN=LARS2 PE=1 SV=2	KOG0435	0	Leucyl-tRNA synthetase	ko00970, Aminoacyl-tRNA biosynthesis;	GO:0002161;GO:0005739;GO:0004823;GO:0006450;GO:0005524;GO:0006429	aminoacyl-tRNA editing activity|mitochondrion|leucine-tRNA ligase activity|regulation of translational fidelity|ATP binding|leucyl-tRNA aminoacylation
CL1008Contig1	26.6503	45.123	8.17765	0.18123	-2.46411	0.0194039	0.604212	Down	gi|483509066|gb|EOA98866.1|Serpin B10, partial [Anas platyrhynchos]	0	sp|O73790|SPB10_CHICK	2e-162	Heterochromatin-associated protein MENT OS=Gallus gallus GN=SERPINB10 PE=1 SV=1	KOG2392	2e-135	Serpin	ko05146, Amoebiasis;	GO:0005615	extracellular space
CL10102Contig1	29.7601	49.5252	9.9949	0.201814	-2.3089	0.0224353	0.644538	Down
CL1012Contig1	49.0648	78.1398	19.9898	0.255821	-1.96679	0.0274145	0.71455	Down
CL10303Contig1	34.975	57.2292	12.7208	0.222278	-2.16956	0.0242223	0.663197	Down	gi|514707990|ref|XP_005010786.1|PREDICTED: desmoplakin, partial [Anas platyrhynchos] >gi|483523527|gb|EOB07807.1| Desmoplakin, partial [Anas platyrhynchos]	1.19232e-173	sp|E9Q557|DESP_MOUSE	5e-141	Desmoplakin OS=Mus musculus GN=Dsp PE=1 SV=1	KOG0516	7e-141	Dystonin, GAS (Growth-arrest-specific protein), and related proteins		GO:0005080;GO:0086091;GO:0005198;GO:0001533;GO:0034332;GO:0016323;GO:0005882;GO:0030674;GO:0086005;GO:0030057;GO:0086069;GO:0002934;GO:0018149;GO:0016337;GO:0045109;GO:0014704;GO:0030216;GO:0003223;GO:0097110;GO:0071896;GO:0005739	protein kinase C binding|regulation of heart rate by cardiac conduction|structural molecule activity|cornified envelope|adherens junction organization|basolateral plasma membrane|intermediate filament|protein binding, bridging|ventricular cardiac muscle cell action potential|desmosome|bundle of His cell to Purkinje myocyte communication|desmosome organization|peptide cross-linking|single organism…
CL10308Contig1	440.259	672.443	208.076	0.309433	-1.6923	0.00629722	0.326205	Down	gi|513212035|ref|XP_004945844.1|PREDICTED: NMDA receptor synaptonuclear signaling and neuronal migration factor isoform X10 [Gallus gallus]	0	sp|Q6X4W1|NSMF_HUMAN	0	NMDA receptor synaptonuclear signaling and neuronal migration factor OS=Homo sapiens GN=NSMF PE=1 SV=1					GO:0005737;GO:2001224;GO:0005634;GO:0071371	cytoplasm|positive regulation of neuron migration|nucleus|cellular response to gonadotropin stimulus
CL10317Contig1	44.8545	71.5365	18.1726	0.254032	-1.97692	0.0291395	0.727417	Down
CL10374Contig1	38.878	75.9387	1.81726	0.0239306	-5.385	1.01407e-05	0.00290111	Down
CL10402Contig1	15.4783	26.4135	4.54314	0.172001	-2.53951	0.0492366	0.924655	Down
CL10425Contig1	14.0194	25.3129	2.72588	0.107687	-3.21508	0.0232928	0.652289	Down
CL10470Contig1	27.463	44.0224	10.9035	0.247681	-2.01344	0.0484298	0.918798	Down
CL1059Contig1	94115.6	150010	38221.4	0.254793	-1.9726	0.00499172	0.279042	Down	gi|543749719|ref|XP_005515578.1|PREDICTED: uncharacterized protein LOC102094822 isoform X1 [Columba livia]	6.59951e-129	sp|P10272|POL_BAEVM	3e-101	Pol polyprotein OS=Baboon endogenous virus (strain M7) GN=pol PE=3 SV=1	KOG0017	3e-72	FOG: Transposon-encoded proteins with TYA, reverse transcriptase, integrase domains in various combinations		GO:0046718;GO:0090305;GO:0003723;GO:0006310;GO:0006278;GO:0003964;GO:0004523;GO:0006508;GO:0075713;GO:0004190;GO:0015074	viral entry into host cell|nucleic acid phosphodiester bond hydrolysis|RNA binding|DNA recombination|RNA-dependent DNA replication|RNA-directed DNA polymerase activity|RNA-DNA hybrid ribonuclease activity|proteolysis|establishment of integrated proviral latency|aspartic-type endopeptidase activity|DNA integration
CL10617Contig1	58.8035	101.252	16.3553	0.161531	-2.63011	0.00329451	0.20927	Down
CL10619Contig1	11.0056	22.0112	0	0	#NAME?	0.00287653	0.190403	Down	gi|529444083|ref|XP_005241758.1|PREDICTED: fibrillin-2-like [Falco peregrinus]	2.88209e-162	sp|P35556|FBN2_HUMAN	4e-159	Fibrillin-2 OS=Homo sapiens GN=FBN2 PE=1 SV=3	KOG1217	2e-154	Fibrillins and related proteins containing Ca2+-binding EGF-like domains		GO:0003160;GO:0001570;GO:0005201;GO:0060958;GO:0003250;GO:0005509;GO:0003007;GO:0005578;GO:0048570	endocardium morphogenesis|vasculogenesis|extracellular matrix structural constituent|endocardial cell development|regulation of cell proliferation involved in heart valve morphogenesis|calcium ion binding|heart morphogenesis|proteinaceous extracellular matrix|notochord morphogenesis
CL10639Contig1	19.2343	33.0168	5.45177	0.165121	-2.59841	0.0288592	0.722571	Down
CL10729Contig1	305.388	469.94	140.837	0.299692	-1.73845	0.00852471	0.38733	Down	gi|529437105|ref|XP_005238316.1|PREDICTED: collagen alpha-5(IV) chain [Falco peregrinus]	1.90972e-75	sp|Q7SIB2|CO4A1_BOVIN	6e-78	Collagen alpha-1(IV) chain (Fragment) OS=Bos taurus GN=COL4A1 PE=1 SV=1	KOG3544	6e-77	Collagens (type IV and type XIII), and related proteins		GO:0005581;GO:0005201	collagen trimer|extracellular matrix structural constituent
CL10792Contig1	36.8688	73.7376	0	0	#NAME?	5.14646e-07	0.000223387	Down	gi|225434859|ref|XP_002282236.1|PREDICTED: ribulose bisphosphate carboxylase/oxygenase activase 2, chloroplastic isoform 1 [Vitis vinifera] >gi|297746032|emb|CBI16088.3| unnamed protein product [Vitis vinifera]	0	sp|Q40281|RCA_MALDO	0	Ribulose bisphosphate carboxylase/oxygenase activase, chloroplastic OS=Malus domestica GN=RCA PE=2 SV=1	KOG0651	0	26S proteasome regulatory complex, ATPase RPT4		GO:0010155;GO:0019684;GO:0031348;GO:0010218;GO:0009595;GO:0009941;GO:0048046;GO:0009867;GO:0010319;GO:0009697;GO:0009862;GO:0010363;GO:0010114;GO:0010310;GO:0010200;GO:0043531;GO:0043900;GO:0006612;GO:0050832;GO:0042742;GO:0005618;GO:0009744;GO:0046863;GO:0000165;GO:0009637;GO:0009644;GO:0010150;GO:0050790;GO:0009409;GO:0009535;GO:0010287;GO:0005634;GO:0005524	regulation of proton transport|photosynthesis, light reaction|negative regulation of defense response|response to far red light|detection of biotic stimulus|chloroplast envelope|apoplast|jasmonic acid mediated signaling pathway|stromule|salicylic acid biosynthetic process|systemic acquired resistance, salicylic acid mediated signaling pathway|regulation of plant-type hypersensitive response|respo…
CL10798Contig1	67.0321	112.257	21.8071	0.19426	-2.36394	0.00625223	0.324208	Down	gi|541982194|ref|XP_005443207.1|PREDICTED: major facilitator superfamily domain-containing protein 2B [Falco cherrug]	6.66688e-135	sp|A4IH46|MFS2B_XENTR	3e-107	Major facilitator superfamily domain-containing protein 2B OS=Xenopus tropicalis GN=mfsd2b PE=2 SV=1
CL10835Contig1	20.6932	34.1174	7.26902	0.213059	-2.23067	0.048859	0.922077	Down
CL10897Contig1	21.7938	36.3185	7.26902	0.200146	-2.32087	0.0377532	0.820773	Down
CL10964Contig1	42.8453	69.3353	16.3553	0.235887	-2.08383	0.0232424	0.652289	Down
CL10966Contig1	34.879	56.1286	13.6294	0.242825	-2.04201	0.0329662	0.774198	Down
CL11054Contig1	35.3588	61.6314	9.08628	0.147429	-2.7619	0.00543228	0.294742	Down
CL11095Contig1	25.3129	50.6258	0	0	#NAME?	1.13126e-05	0.00314697	Down	gi|255543014|ref|XP_002512570.1|s-adenosylmethionine synthetase, putative [Ricinus communis] >gi|223548531|gb|EEF50022.1| s-adenosylmethionine synthetase, putative [Ricinus communis]	0	sp|Q307Y9|METK1_SOLTU	0	S-adenosylmethionine synthase 1 OS=Solanum tuberosum GN=METK1 PE=2 SV=1	KOG1506	0	S-adenosylmethionine synthetase	ko00270, Cysteine and methionine metabolism;ko01230, Biosynthesis of amino acids;	GO:0004478;GO:0046872;GO:0006556;GO:0006730;GO:0005524;GO:0005737	methionine adenosyltransferase activity|metal ion binding|S-adenosylmethionine biosynthetic process|one-carbon metabolic process|ATP binding|cytoplasm
CL11097Contig1	24.9035	40.7208	9.08628	0.223136	-2.164	0.0410515	0.848713	Down
CL11166Contig1	718.906	1195.21	242.604	0.20298	-2.30059	8.74122e-05	0.0158891	Down	gi|514793752|ref|XP_005030760.1|PREDICTED: solute carrier family 22 member 4, partial [Anas platyrhynchos]	1.27613e-99	sp|Q9Z306|S22A4_MOUSE	9e-81	Solute carrier family 22 member 4 OS=Mus musculus GN=Slc22a4 PE=1 SV=1	KOG0255	6e-80	Synaptic vesicle transporter SVOP and related transporters (major facilitator superfamily)		GO:0016021;GO:0005739;GO:0009437;GO:0006641;GO:0015491;GO:0015226;GO:0030165;GO:0016324;GO:0015879;GO:0034220	integral component of membrane|mitochondrion|carnitine metabolic process|triglyceride metabolic process|cation:cation antiporter activity|carnitine transmembrane transporter activity|PDZ domain binding|apical plasma membrane|carnitine transport|ion transmembrane transport
CL1124Contig1	38.635	62.732	14.538	0.231749	-2.10937	0.0246183	0.668223	Down	gi|513233342|ref|XP_004949773.1|PREDICTED: fidgetin-like 2 [Gallus gallus]	5.77313e-155	sp|A6NMB9|FIGL2_HUMAN	8e-106	Putative fidgetin-like protein 2 OS=Homo sapiens GN=FIGNL2 PE=5 SV=2	KOG0740	2e-90	AAA+-type ATPase		GO:0017111;GO:0005524	nucleoside-triphosphatase activity|ATP binding
CL1130Contig1	77.6988	119.961	35.4365	0.2954	-1.75926	0.0326374	0.768627	Down	gi|514705339|ref|XP_005009782.1|PREDICTED: CD109 antigen [Anas platyrhynchos]	0	sp|Q6YHK3|CD109_HUMAN	7e-153	CD109 antigen OS=Homo sapiens GN=CD109 PE=1 SV=2	KOG1366	2e-154	Alpha-macroglobulin		GO:0005615;GO:0004866;GO:0010951	extracellular space|endopeptidase inhibitor activity|negative regulation of endopeptidase activity
CL11349Contig1	48.1817	83.6426	12.7208	0.152085	-2.71705	0.00347317	0.217239	Down
CL11355Contig1	17.9673	34.1174	1.81726	0.0532648	-4.23067	0.00260551	0.181703	Down	gi|514774721|ref|XP_005026422.1|PREDICTED: LOW QUALITY PROTEIN: A disintegrin and metalloproteinase with thrombospondin motifs 12 [Anas platyrhynchos]	3.42182e-176	sp|P58397|ATS12_HUMAN	1e-141	A disintegrin and metalloproteinase with thrombospondin motifs 12 OS=Homo sapiens GN=ADAMTS12 PE=1 SV=2	KOG3538	3e-142	Disintegrin metalloproteinases with thrombospondin repeats		GO:0004222;GO:0005578;GO:0006508;GO:0008270	metalloendopeptidase activity|proteinaceous extracellular matrix|proteolysis|zinc ion binding
CL11374Contig1	29.7151	59.4303	0	0	#NAME?	3.08791e-06	0.00103653	Down	gi|225459918|ref|XP_002264295.1|PREDICTED: chlorophyll a-b binding protein CP26, chloroplastic [Vitis vinifera] >gi|147770824|emb|CAN76428.1| hypothetical protein VITISV_023565 [Vitis vinifera] >gi|297734735|emb|CBI16969.3| unnamed protein product [Vitis vinifera]	9.36814e-128	sp|Q9XF89|CB5_ARATH	1e-155	Chlorophyll a-b binding protein CP26, chloroplastic OS=Arabidopsis thaliana GN=LHCB5 PE=2 SV=1				ko00196, Photosynthesis - antenna proteins;	GO:0009517;GO:0010114;GO:0016168;GO:0046872;GO:0010196;GO:0006364;GO:0009783;GO:0009637;GO:0009533;GO:0010155;GO:0009744;GO:0010287;GO:0010218;GO:0009765;GO:0009644;GO:0019344	PSII associated light-harvesting complex II|response to red light|chlorophyll binding|metal ion binding|nonphotochemical quenching|rRNA processing|photosystem II antenna complex|response to blue light|chloroplast stromal thylakoid|regulation of proton transport|response to sucrose|plastoglobule|response to far red light|photosynthesis, light harvesting|response to high light intensity|cysteine bi…
CL11414Contig1	41.6488	66.0337	17.2639	0.261441	-1.93544	0.0348655	0.798886	Down
CL11430Contig1	33.8295	64.9331	2.72588	0.0419799	-4.57416	8.95635e-05	0.0160485	Down
CL11440Contig1	14.5697	26.4135	2.72588	0.103201	-3.27648	0.0193476	0.604212	Down	gi|483520327|gb|EOB05841.1|hypothetical protein Anapl_01163 [Anas platyrhynchos]	1.28686e-68	sp|Q66H52|IPIL1_RAT	5e-22	Inositol 1,4,5-trisphosphate receptor-interacting protein-like 1 OS=Rattus norvegicus GN=Itpripl1 PE=2 SV=1
CL1144Contig1	83.4191	138.671	28.1675	0.203125	-2.29956	0.00570729	0.307345	Down
CL11472Contig1	17.5835	29.7151	5.45177	0.183468	-2.4464	0.044785	0.883792	Down
CL11498Contig1	62.9627	96.8494	29.0761	0.30022	-1.73591	0.0411285	0.848713	Down
CL11530Contig1	31.6028	55.028	8.17765	0.148609	-2.75041	0.00709817	0.347187	Down
CL11550Contig1	28.0133	45.123	10.9035	0.24164	-2.04907	0.0436816	0.870587	Down
CL11580Contig1	52.7248	83.6426	21.8071	0.260717	-1.93944	0.0275833	0.71455	Down
CL1158Contig1	131.262	208.006	54.5177	0.262097	-1.93183	0.0114454	0.444714	Down	gi|483511513|gb|EOB00328.1|Uncharacterized protein C14orf37-like protein, partial [Anas platyrhynchos]	7.59188e-57	sp|Q86TY3|CN037_HUMAN	2e-49	Uncharacterized protein C14orf37 OS=Homo sapiens GN=C14orf37 PE=1 SV=1
CL1158Contig2	74.1603	121.062	27.2588	0.225165	-2.15095	0.0106803	0.432868	Down
CL11597Contig1	50.4278	78.1398	22.7157	0.290706	-1.78237	0.0431485	0.865911	Down						KOG4297	8e-06	C-type lectin
CL11625Contig1	17.1291	29.7151	4.54314	0.15289	-2.70944	0.0306033	0.751436	Down
CL1162Contig1	112.911	169.486	56.3349	0.332386	-1.58907	0.0395405	0.838822	Down
CL11636Contig1	29.3058	49.5252	9.08628	0.183468	-2.4464	0.0168592	0.554981	Down
CL11663Contig1	83.1761	125.464	40.8882	0.325896	-1.61751	0.0459545	0.889603	Down	gi|524981726|ref|XP_005038885.1|PREDICTED: cell adhesion molecule 2 isoform X2 [Ficedula albicollis]	0	sp|Q8N3J6|CADM2_HUMAN	0	Cell adhesion molecule 2 OS=Homo sapiens GN=CADM2 PE=2 SV=1	KOG4475	3e-14	FOG: Immunoglobin and related proteins		GO:0016021	integral component of membrane
CL11665Contig1	35.8836	57.2292	14.538	0.254032	-1.97692	0.037128	0.811385	Down	gi|326927964|ref|XP_003210156.1|PREDICTED: solute carrier family 41 member 1-like isoform 1 [Meleagris gallopavo] >gi|363738667|ref|XP_003642048.1| PREDICTED: solute carrier family 41 member 1-like isoform X1 [Gallus gallus]	8.22517e-18	sp|Q3SWT5|S41A3_RAT	3e-07	Solute carrier family 41 member 3 OS=Rattus norvegicus GN=Slc41a3 PE=2 SV=1					GO:0008324;GO:0006812	cation transmembrane transporter activity|cation transport
CL11689Contig1	315.543	523.867	107.218	0.204667	-2.28865	0.00064018	0.0693799	Down
CL11700Contig1	18.78	33.0168	4.54314	0.137601	-2.86144	0.0191939	0.602888	Down
CL11715Contig1	6313.32	8463.31	4163.33	0.491927	-1.02348	0.0333818	0.7807	Down
CL11763Contig1	12.5605	24.2123	0.908628	0.0375275	-4.73591	0.00645358	0.329146	Down	gi|514732049|ref|XP_005016507.1|PREDICTED: ephrin type-B receptor 5-like [Anas platyrhynchos] >gi|483516909|gb|EOB03603.1| Ephrin type-B receptor 5, partial [Anas platyrhynchos]	2.60475e-98	sp|Q07497|EPHB5_CHICK	4e-109	Ephrin type-B receptor 5 OS=Gallus gallus GN=EPHB5 PE=2 SV=1	KOG0196	2e-62	Tyrosine kinase, EPH (ephrin) receptor family		GO:0006468;GO:0005887;GO:0005524;GO:0035898;GO:0055074;GO:0048013;GO:0005003	protein phosphorylation|integral component of plasma membrane|ATP binding|parathyroid hormone secretion|calcium ion homeostasis|ephrin receptor signaling pathway|ephrin receptor activity
CL11800Contig1	75.0434	115.559	34.5278	0.29879	-1.7428	0.0352081	0.798886	Down	gi|363744974|ref|XP_424479.2|PREDICTED: LOW QUALITY PROTEIN: methyltransferase like 7A [Gallus gallus]	1.60448e-124	sp|Q9H8H3|MET7A_HUMAN	4e-101	Methyltransferase-like protein 7A OS=Homo sapiens GN=METTL7A PE=1 SV=1	KOG4300	1e-101	Predicted methyltransferase		GO:0032259;GO:0008168	methylation|methyltransferase activity
CL1203Contig2	1156.5	1665.15	647.851	0.389065	-1.36192	0.0106239	0.432015	Down	gi|514745769|ref|XP_005019521.1|PREDICTED: tumor necrosis factor receptor superfamily member 13B [Anas platyrhynchos]	2.37183e-94	sp|O14836|TR13B_HUMAN	5e-06	Tumor necrosis factor receptor superfamily member 13B OS=Homo sapiens GN=TNFRSF13B PE=1 SV=1				ko04060, Cytokine-cytokine receptor interaction;ko05340, Primary immunodeficiency;ko04672, Intestinal immune network for IgA production;	GO:0005887;GO:0001782;GO:0030889;GO:0009897	integral component of plasma membrane|B cell homeostasis|negative regulation of B cell proliferation|external side of plasma membrane
CL1212Contig2	171.368	313.66	29.0761	0.0926994	-3.4313	1.37792e-05	0.00363243	Down
CL12141Contig1	14.6656	27.514	1.81726	0.0660483	-3.92033	0.00823076	0.378843	Down
CL12224Contig1	345.847	553.582	138.111	0.249487	-2.00297	0.00213753	0.158741	Down	gi|61097957|ref|NP_001012898.1|DNA primase large subunit [Gallus gallus] >gi|53127816|emb|CAG31237.1| hypothetical protein RCJMB04_3o11 [Gallus gallus] >gi|60098897|emb|CAH65279.1| hypothetical protein RCJMB04_14m23 [Gallus gallus]	6.42136e-74	sp|O89044|PRI2_RAT	1e-56	DNA primase large subunit OS=Rattus norvegicus GN=Prim2 PE=2 SV=1	KOG2267	1e-55	Eukaryotic-type DNA primase, large subunit	ko03030, DNA replication;ko00230, Purine metabolism;ko00240, Pyrimidine metabolism;	GO:0046872;GO:0003677;GO:0003896;GO:0051539;GO:1990077;GO:0006269	metal ion binding|DNA binding|DNA primase activity|4 iron, 4 sulfur cluster binding|primosome complex|DNA replication, synthesis of RNA primer
CL12315Contig1	75.7151	123.263	28.1675	0.228515	-2.12964	0.0111339	0.443242	Down	gi|514716523|ref|XP_005012809.1|PREDICTED: interleukin-8-like [Anas platyrhynchos] >gi|111036706|dbj|BAF02383.1| interleukin-8 [Anas platyrhynchos] >gi|111036708|dbj|BAF02384.1| interleukin-8 [Anas platyrhynchos]	6.40439e-19	sp|P08317|IL8_CHICK	2e-23	Interleukin-8 OS=Gallus gallus GN=IL8 PE=2 SV=1				ko04064, NF-kappa B signaling pathway;ko04060, Cytokine-cytokine receptor interaction;ko05200, Pathways in cancer;ko05202, Transcriptional misregulation in cancers;ko05219, Bladder cancer;ko04932, Non-alcoholic fatty liver disease (NAFLD);ko05323, Rheumatoid arthritis;ko05120, Epithelial cell signaling in Helicobacter pylori infection;ko05131, Shigellosis;ko05132, Salmonella infection;ko05133, Pe…	GO:0006955;GO:0005615;GO:0008083;GO:0008009;GO:0006935	immune response|extracellular space|growth factor activity|chemokine activity|chemotaxis
CL12327Contig1	249.573	366.487	132.66	0.361977	-1.46603	0.0309572	0.756663	Down	gi|326926948|ref|XP_003209658.1|PREDICTED: LOW QUALITY PROTEIN: A disintegrin and metalloproteinase with thrombospondin motifs 7-like [Meleagris gallopavo]	5.71213e-146	sp|Q9UKP4|ATS7_HUMAN	3e-116	A disintegrin and metalloproteinase with thrombospondin motifs 7 OS=Homo sapiens GN=ADAMTS7 PE=1 SV=2	KOG3538	9e-125	Disintegrin metalloproteinases with thrombospondin repeats		GO:0004222;GO:0009986;GO:0005578;GO:0006508;GO:0008270	metalloendopeptidase activity|cell surface|proteinaceous extracellular matrix|proteolysis|zinc ion binding
CL12417Contig1	92.5564	149.676	35.4365	0.236754	-2.07854	0.0102665	0.422326	Down
CL12427Contig1	142.812	210.207	75.4161	0.35877	-1.47887	0.0467441	0.899354	Down	gi|513231163|ref|XP_424425.4|PREDICTED: selenocysteine insertion sequence-binding protein 2 [Gallus gallus]	1.86289e-59
CL12503Contig1	12.3686	22.0112	2.72588	0.123841	-3.01344	0.0411285	0.848713	Down
CL12608Contig1	39.4027	71.5365	7.26902	0.101613	-3.29885	0.00104275	0.0977715	Down
CL12619Contig1	275.251	436.923	113.578	0.259951	-1.94369	0.00414165	0.245337	Down	gi|541959031|ref|XP_005435262.1|PREDICTED: collagen alpha-1(VIII) chain-like [Falco cherrug]	3.76742e-78	sp|Q00780|CO8A1_MOUSE	2e-76	Collagen alpha-1(VIII) chain OS=Mus musculus GN=Col8a1 PE=1 SV=3					GO:0001525;GO:0010811;GO:0048593;GO:0007155;GO:0005581;GO:0005604;GO:0050673	angiogenesis|positive regulation of cell-substrate adhesion|camera-type eye morphogenesis|cell adhesion|collagen trimer|basement membrane|epithelial cell proliferation
CL12628Contig1	106.275	208.006	4.54314	0.0218414	-5.51679	3.04745e-08	2.12819e-05	Down	gi|483513925|gb|EOB01797.1|hypothetical protein Anapl_01534 [Anas platyrhynchos]	4.01243e-14
CL12658Contig1	120.327	181.593	59.0608	0.325238	-1.62043	0.0342771	0.79024	Down	gi|514706282|ref|XP_005010227.1|PREDICTED: CST complex subunit TEN1 [Anas platyrhynchos]	4.49428e-61	sp|Q86WV5|TEN1L_HUMAN	2e-42	CST complex subunit TEN1 OS=Homo sapiens GN=TEN1 PE=1 SV=2					GO:0070188	Stn1-Ten1 complex
CL12775Contig1	71.6008	117.76	25.4416	0.216046	-2.21059	0.00926105	0.40026	Down
CL12782Contig1	26.3175	51.7264	0.908628	0.017566	-5.83107	5.40187e-05	0.0110565	Down
CL12798Contig1	64.7606	112.257	17.2639	0.153789	-2.70098	0.00227271	0.163243	Down
CL12863Contig1	18.7095	37.4191	0	0	#NAME?	0.000110053	0.0189597	Down
CL12899Contig1	2555.42	3505.29	1605.54	0.458035	-1.12647	0.0217841	0.641504	Down	gi|61098430|ref|NP_001012962.1|superkiller viralicidic activity 2-like 2 [Gallus gallus] >gi|53126871|emb|CAG30992.1| hypothetical protein RCJMB04_1h14 [Gallus gallus]	0	sp|Q9CZU3|SK2L2_MOUSE	0	Superkiller viralicidic activity 2-like 2 OS=Mus musculus GN=Skiv2l2 PE=2 SV=1	KOG0948	0	Nuclear exosomal RNA helicase MTR4, DEAD-box superfamily	ko03018, RNA degradation;	GO:0000178;GO:0003676;GO:0008026;GO:0008380;GO:0005524;GO:0071013;GO:0000460;GO:0006397	exosome (RNase complex)|nucleic acid binding|ATP-dependent helicase activity|RNA splicing|ATP binding|catalytic step 2 spliceosome|maturation of 5.8S rRNA|mRNA processing
CL12986Contig1	61.9387	111.157	12.7208	0.11444	-3.12733	0.000629267	0.0691796	Down	gi|514723333|ref|XP_005014427.1|PREDICTED: uncharacterized protein LOC101802925 [Anas platyrhynchos]	0	sp|Q9DBB9|CPN2_MOUSE	6e-75	Carboxypeptidase N subunit 2 OS=Mus musculus GN=Cpn2 PE=1 SV=2	KOG0619	2e-57	FOG: Leucine rich repeat
CL13047Contig1	184.39	280.643	88.1369	0.314053	-1.67092	0.0202126	0.618669	Down	gi|514746982|ref|XP_005019810.1|PREDICTED: tetraspanin-32 isoform X4 [Anas platyrhynchos]	1.83393e-123	sp|Q96QS1|TSN32_HUMAN	4e-61	Tetraspanin-32 OS=Homo sapiens GN=TSPAN32 PE=2 SV=1	KOG3882	8e-08	Tetraspanin family integral membrane protein		GO:0042832;GO:0070527;GO:0070442;GO:0005622;GO:0007229;GO:0007010;GO:0009986;GO:0008285;GO:0030886;GO:0050688	defense response to protozoan|platelet aggregation|alphaIIb-beta3 integrin complex|intracellular|integrin-mediated signaling pathway|cytoskeleton organization|cell surface|negative regulation of cell proliferation|negative regulation of myeloid dendritic cell activation|regulation of defense response to virus
CL13074Contig1	3638.3	5029.56	2247.04	0.446766	-1.16241	0.0161789	0.540203	Down	gi|514727608|ref|XP_005015439.1|PREDICTED: E3 ubiquitin-protein ligase BRE1A isoform X1 [Anas platyrhynchos] >gi|514727612|ref|XP_005015440.1| PREDICTED: E3 ubiquitin-protein ligase BRE1A isoform X2 [Anas platyrhynchos]	0	sp|Q5ZLS3|BRE1A_CHICK	0	E3 ubiquitin-protein ligase BRE1A OS=Gallus gallus GN=RNF20 PE=2 SV=1	KOG0978	0	E3 ubiquitin ligase involved in syntaxin degradation		GO:0045893;GO:0006511;GO:0030336;GO:0002039;GO:0042393;GO:0008270;GO:0033523;GO:0005730;GO:0000209;GO:0010390;GO:0031625;GO:0016874;GO:0004842;GO:0003713;GO:0033503	positive regulation of transcription, DNA-templated|ubiquitin-dependent protein catabolic process|negative regulation of cell migration|p53 binding|histone binding|zinc ion binding|histone H2B ubiquitination|nucleolus|protein polyubiquitination|histone monoubiquitination|ubiquitin protein ligase binding|ligase activity|ubiquitin-protein transferase activity|transcription coactivator activity|HULC…
CL13090Contig1	48.2777	84.7432	11.8122	0.139388	-2.84282	0.00240421	0.170021	Down
CL13110Contig1	16.0286	27.514	4.54314	0.165121	-2.59841	0.0419819	0.854721	Down
CL13148Contig1	98.5584	150.777	46.34	0.307342	-1.70208	0.0313455	0.759152	Down
CL13265Contig1	70.6217	122.162	19.0812	0.156195	-2.67858	0.00212266	0.158338	Down	gi|514767367|ref|XP_005024672.1|PREDICTED: 2-hydroxyacylsphingosine 1-beta-galactosyltransferase [Anas platyrhynchos] >gi|483506793|gb|EOA97672.1| 2-hydroxyacylsphingosine 1-beta-galactosyltransferase, partial [Anas platyrhynchos]	0	sp|Q16880|CGT_HUMAN	0	2-hydroxyacylsphingosine 1-beta-galactosyltransferase OS=Homo sapiens GN=UGT8 PE=2 SV=2	KOG1192	0	UDP-glucuronosyl and UDP-glucosyl transferase	ko00600, Sphingolipid metabolism;	GO:0030913;GO:0002175;GO:0048812;GO:0007010;GO:0008152;GO:0016758;GO:0008088	paranodal junction assembly|protein localization to paranode region of axon|neuron projection morphogenesis|cytoskeleton organization|metabolic process|transferase activity, transferring hexosyl groups|axon cargo transport
CL13422Contig1	14.5697	26.4135	2.72588	0.103201	-3.27648	0.0193476	0.604212	Down	gi|514714008|ref|XP_005012204.1|PREDICTED: uncharacterized protein LOC101793456 [Anas platyrhynchos]	4.06257e-78	sp|Q5U649|CL060_HUMAN	2e-08	Uncharacterized protein C12orf60 OS=Homo sapiens GN=C12orf60 PE=2 SV=2
CL13433Contig1	755.22	1168.8	341.644	0.292304	-1.77446	0.00190032	0.144974	Down	gi|543726792|ref|XP_005504508.1|PREDICTED: hydroxyacylglutathione hydrolase-like protein [Columba livia] >gi|449281350|gb|EMC88430.1| Hydroxyacylglutathione hydrolase-like protein [Columba livia]	9.34415e-142	sp|Q5ZLY2|HAGHL_CHICK	1e-170	Hydroxyacylglutathione hydrolase-like protein OS=Gallus gallus GN=HAGHL PE=2 SV=1	KOG0813	3e-107	Glyoxylase	ko00620, Pyruvate metabolism;	GO:0005737;GO:0004416;GO:0008270;GO:0006750	cytoplasm|hydroxyacylglutathione hydrolase activity|zinc ion binding|glutathione biosynthetic process
CL13480Contig1	38.5646	67.1342	9.9949	0.148879	-2.74778	0.00473933	0.272408	Down
CL13495Contig1	84.3532	144.173	24.5329	0.170163	-2.55501	0.00237628	0.168518	Down
CL13516Contig1	591.089	828.722	353.456	0.426507	-1.22936	0.0352899	0.798886	Down	gi|543742290|ref|XP_005512000.1|PREDICTED: LOW QUALITY PROTEIN: proline-rich protein 11 [Columba livia]	7.08961e-107	sp|Q96HE9|PRR11_HUMAN	2e-53	Proline-rich protein 11 OS=Homo sapiens GN=PRR11 PE=1 SV=1
CL13559Contig1	23.1822	41.8213	4.54314	0.108632	-3.20248	0.00583951	0.31246	Down
CL13567Contig1	507.939	708.761	307.116	0.433314	-1.20652	0.0435225	0.870587	Down	gi|527256505|ref|XP_005146525.1|PREDICTED: lymphokine-activated killer T-cell-originated protein kinase [Melopsittacus undulatus]	2.19744e-146	sp|Q96KB5|TOPK_HUMAN	6e-165	Lymphokine-activated killer T-cell-originated protein kinase OS=Homo sapiens GN=PBK PE=1 SV=3	KOG0192	1e-165	Tyrosine kinase specific for activated (GTP-bound) p21cdc42Hs		GO:0007067;GO:0005515;GO:0006468;GO:0005524;GO:0004674	mitotic nuclear division|protein binding|protein phosphorylation|ATP binding|protein serine/threonine kinase activity
CL13584Contig1	217.785	330.168	105.401	0.319234	-1.64732	0.018503	0.589728	Down	gi|363744581|ref|XP_424846.3|PREDICTED: phosphoserine aminotransferase isoform X2 [Gallus gallus]	0	sp|Q99K85|SERC_MOUSE	0	Phosphoserine aminotransferase OS=Mus musculus GN=Psat1 PE=1 SV=1	KOG2790	0	Phosphoserine aminotransferase	ko00260, Glycine, serine and threonine metabolism;ko00680, Methane metabolism;ko00750, Vitamin B6 metabolism;ko01200, Carbon metabolism;ko01230, Biosynthesis of amino acids;	GO:0030170;GO:0004648;GO:0006564	pyridoxal phosphate binding|O-phospho-L-serine:2-oxoglutarate aminotransferase activity|L-serine biosynthetic process
CL13626Contig1	69.3037	112.257	26.3502	0.234731	-2.09092	0.013817	0.496422	Down
CL13630Contig1	33.3241	53.9275	12.7208	0.235887	-2.08383	0.0317332	0.760062	Down
CL13688Contig1	91.1424	138.671	43.6141	0.314516	-1.6688	0.0368886	0.806694	Down	gi|525004980|ref|XP_005050179.1|PREDICTED: 4-hydroxyphenylpyruvate dioxygenase-like protein [Ficedula albicollis]	2.00707e-173	sp|Q96IR7|HPDL_HUMAN	6e-94	4-hydroxyphenylpyruvate dioxygenase-like protein OS=Homo sapiens GN=HPDL PE=1 SV=1	KOG0638	1e-94	4-hydroxyphenylpyruvate dioxygenase		GO:0055114;GO:0003868;GO:0009072	oxidation-reduction process|4-hydroxyphenylpyruvate dioxygenase activity|aromatic amino acid family metabolic process
CL13707Contig1	408.586	621.817	195.355	0.314168	-1.67039	0.00769977	0.363347	Down	gi|514742925|ref|XP_005018849.1|PREDICTED: LOW QUALITY PROTEIN: FRAS1-related extracellular matrix protein 1 [Anas platyrhynchos]	0	sp|Q5H8C1|FREM1_HUMAN	0	FRAS1-related extracellular matrix protein 1 OS=Homo sapiens GN=FREM1 PE=1 SV=3	KOG3597	0	Proteoglycan		GO:0007160;GO:0030246;GO:0016021;GO:0005604;GO:0007154;GO:0097094	cell-matrix adhesion|carbohydrate binding|integral component of membrane|basement membrane|cell communication|craniofacial suture morphogenesis
CL13764Contig1	14.0194	25.3129	2.72588	0.107687	-3.21508	0.0232928	0.652289	Down
CL13779Contig1	9.35477	18.7095	0	0	#NAME?	0.00653703	0.329146	Down
CL13852Contig1	104.157	162.883	45.4314	0.27892	-1.84208	0.0193777	0.604212	Down
CL13883Contig1	13.2067	26.4135	0	0	#NAME?	0.00103907	0.0976868	Down
CL13895Contig1	2431.83	3640.66	1223.01	0.335932	-1.57376	0.00158039	0.128969	Down	gi|514746757|ref|XP_005019765.1|PREDICTED: cell division cycle-associated protein 7 [Anas platyrhynchos]	0	sp|Q32PH1|CDCA7_BOVIN	9e-123	Cell division cycle-associated protein 7 OS=Bos taurus GN=CDCA7 PE=2 SV=1					GO:0005634;GO:0042127	nucleus|regulation of cell proliferation
CL13931Contig1	330.472	471.04	189.903	0.403157	-1.31059	0.041818	0.854721	Down	gi|50732786|ref|XP_418763.1|PREDICTED: glycerol-3-phosphate dehydrogenase 1-like isoform X2 [Gallus gallus]	5.71349e-09	sp|Q3ULJ0|GPD1L_MOUSE	9e-10	Glycerol-3-phosphate dehydrogenase 1-like protein OS=Mus musculus GN=Gpd1l PE=1 SV=2	KOG2711	1e-09	Glycerol-3-phosphate dehydrogenase/dihydroxyacetone 3-phosphate reductase
CL13939Contig1	6.05309	12.1062	0	0	#NAME?	0.0405318	0.846811	Down
CL13961Contig1	22.8239	42.9219	2.72588	0.063508	-3.97692	0.00147049	0.123814	Down	gi|541962111|ref|XP_005436540.1|PREDICTED: protein SPT2 homolog [Falco cherrug]	1.22439e-14	sp|A6QP35|KR108_BOVIN	8e-08	Keratin-associated protein 10-8 OS=Bos taurus GN=KRTAP10-8 PE=2 SV=1	KOG4726	4e-07	Ultrahigh sulfur keratin-associated protein
CL14062Contig1	13.9234	24.2123	3.63451	0.15011	-2.73591	0.0456961	0.886646	Down
CL14105Contig1	18.2297	31.9163	4.54314	0.142346	-2.81253	0.0223985	0.644538	Down
CL1411Contig1	69.3742	107.855	30.8933	0.286434	-1.80373	0.0316765	0.760062	Down
CL14136Contig1	22444.4	34604.9	10283.8	0.297179	-1.7506	0.000956589	0.0913951	Down	gi|514703960|ref|XP_005009117.1|PREDICTED: collagen alpha-1(IV) chain, partial [Anas platyrhynchos]	4.33022e-173	sp|Q7SIB2|CO4A1_BOVIN	4e-146	Collagen alpha-1(IV) chain (Fragment) OS=Bos taurus GN=COL4A1 PE=1 SV=1	KOG3544	3e-133	Collagens (type IV and type XIII), and related proteins	ko04510, Focal adhesion;ko04151, PI3K-Akt signaling pathway;ko04512, ECM-receptor interaction;ko05200, Pathways in cancer;ko05222, Small cell lung cancer;ko05146, Amoebiasis;ko04974, Protein digestion and absorption;	GO:0007528;GO:0005201;GO:0048407;GO:0071230;GO:0005587	neuromuscular junction development|extracellular matrix structural constituent|platelet-derived growth factor binding|cellular response to amino acid stimulus|collagen type IV trimer
CL14225Contig1	351.363	528.269	174.456	0.330242	-1.59841	0.0127726	0.474621	Down	gi|541963396|ref|XP_005436988.1|PREDICTED: collagen and calcium-binding EGF domain-containing protein 1-like [Falco cherrug]	2.70209e-37	sp|Q3MI99|CCBE1_MOUSE	5e-28	Collagen and calcium-binding EGF domain-containing protein 1 OS=Mus musculus GN=Ccbe1 PE=2 SV=2	KOG1218	4e-27	Proteins containing Ca2+-binding EGF-like domains		GO:0005509	calcium ion binding
CL14239Contig1	928.995	1374.6	483.39	0.351658	-1.50775	0.0061755	0.321221	Down
CL14383Contig1	12.4645	23.1118	1.81726	0.078629	-3.6688	0.0185641	0.589728	Down
CL14465Contig1	20.6932	34.1174	7.26902	0.213059	-2.23067	0.048859	0.922077	Down
CL14468Contig1	19599.3	29934.2	9264.37	0.309491	-1.69203	0.0011726	0.106548	Down	gi|514764158|ref|XP_005023909.1|PREDICTED: LOW QUALITY PROTEIN: nidogen-1 [Anas platyrhynchos]	0	sp|P14543|NID1_HUMAN	0	Nidogen-1 OS=Homo sapiens GN=NID1 PE=1 SV=3	KOG1214	0	Nidogen and related basement membrane protein proteins		GO:0007160;GO:0043237;GO:0010811;GO:0005518;GO:0005509;GO:0005605;GO:0016021;GO:0032836;GO:0071944	cell-matrix adhesion|laminin-1 binding|positive regulation of cell-substrate adhesion|collagen binding|calcium ion binding|basal lamina|integral component of membrane|glomerular basement membrane development|cell periphery
CL14555Contig1	19.8805	35.2179	4.54314	0.129001	-2.95455	0.0141447	0.496422	Down
CL14646Contig1	15.6702	28.6146	2.72588	0.095262	-3.39196	0.0134186	0.490661	Down
CL14680Contig1	35.7876	56.1286	15.4467	0.275201	-1.86144	0.0487614	0.921153	Down
CL14704Contig1	348.067	542.577	153.558	0.283016	-1.82104	0.00491651	0.277831	Down	gi|529418439|ref|XP_005229098.1|PREDICTED: serine/threonine-protein kinase PLK1 [Falco peregrinus]	0	sp|P70032|PLK1_XENLA	0	Serine/threonine-protein kinase PLK1 OS=Xenopus laevis GN=plk1 PE=1 SV=1	KOG0575	0	Polo-like serine/threonine protein kinase	ko04111, Cell cycle - yeast;ko04113, Meiosis - yeast;	GO:0004674;GO:0000070;GO:0007094;GO:0030496;GO:0071168;GO:0016567;GO:0007092;GO:0051233;GO:0045736;GO:0005876;GO:0005737;GO:0031572;GO:0000922;GO:0031648;GO:0000910;GO:0043393;GO:0001578;GO:0000122;GO:0005524;GO:0018105;GO:0019901;GO:0051297;GO:0010997;GO:0000086;GO:0043066;GO:0005813;GO:0000942;GO:0010800;GO:0008017;GO:0001556	protein serine/threonine kinase activity|mitotic sister chromatid segregation|mitotic spindle assembly checkpoint|midbody|protein localization to chromatin|protein ubiquitination|activation of mitotic anaphase-promoting complex activity|spindle midzone|negative regulation of cyclin-dependent protein serine/threonine kinase activity|spindle microtubule|cytoplasm|G2 DNA damage checkpoint|spindle po…
CL14722Contig1	13.0148	24.2123	1.81726	0.0750549	-3.73591	0.0150871	0.51788	Down
CL14756Contig1	22.8943	38.5196	7.26902	0.18871	-2.40576	0.0292599	0.72934	Down
CL14832Contig1	17.8714	33.0168	2.72588	0.0825604	-3.59841	0.00658147	0.329735	Down
CL14840Contig1	15.4783	26.4135	4.54314	0.172001	-2.53951	0.0492366	0.924655	Down
CL1489Contig1	52.3665	84.7432	19.9898	0.235887	-2.08383	0.0187679	0.593165	Down
CL14932Contig1	12.4645	23.1118	1.81726	0.078629	-3.6688	0.0185641	0.589728	Down
CL14984Contig1	9.90505	19.8101	0	0	#NAME?	0.00494298	0.277831	Down	gi|21068893|dbj|BAB93003.1|NADPH:protochlorophyllide oxidoreductase [Nicotiana tabacum]	1.81322e-69	sp|Q9SDT1|POR_DAUCA	2e-86	Protochlorophyllide reductase, chloroplastic OS=Daucus carota GN=POR1 PE=2 SV=1	KOG1208	6e-85	Dehydrogenases with different specificities (related to short-chain alcohol dehydrogenases)	ko00860, Porphyrin and chlorophyll metabolism;	GO:0055114;GO:0009723;GO:0015995;GO:0009941;GO:0016630;GO:0009535;GO:0015979	oxidation-reduction process|response to ethylene|chlorophyll biosynthetic process|chloroplast envelope|protochlorophyllide reductase activity|chloroplast thylakoid membrane|photosynthesis
CL15007Contig1	20.8851	36.3185	5.45177	0.15011	-2.73591	0.0187559	0.593165	Down
CL15009Contig1	1110.75	1557.29	664.207	0.426513	-1.22934	0.0213515	0.637987	Down	gi|513211033|ref|XP_004934481.1|PREDICTED: DNA polymerase epsilon catalytic subunit A isoform X3 [Gallus gallus]	0	sp|Q07864|DPOE1_HUMAN	0	DNA polymerase epsilon catalytic subunit A OS=Homo sapiens GN=POLE PE=1 SV=5	KOG1798	0	DNA polymerase epsilon, catalytic subunit A	ko03030, DNA replication;ko03410, Base excision repair;ko03420, Nucleotide excision repair;ko05166, HTLV-I infection;ko00230, Purine metabolism;ko00240, Pyrimidine metabolism;	GO:0008270;GO:0003887;GO:0006260;GO:0006297;GO:0003677;GO:0000731;GO:0008622;GO:0006287;GO:0000166;GO:0000082;GO:0003682	zinc ion binding|DNA-directed DNA polymerase activity|DNA replication|nucleotide-excision repair, DNA gap filling|DNA binding|DNA synthesis involved in DNA repair|epsilon DNA polymerase complex|base-excision repair, gap-filling|nucleotide binding|G1/S transition of mitotic cell cycle|chromatin binding
CL15016Contig1	15.8622	30.8157	0.908628	0.0294859	-5.08383	0.00175612	0.138376	Down	gi|514715669|ref|XP_005012607.1|PREDICTED: LOW QUALITY PROTEIN: transcription factor SOX-11-like, partial [Anas platyrhynchos]	1.39117e-34	sp|P48435|SOX11_CHICK	8e-38	Transcription factor SOX-11 OS=Gallus gallus GN=SOX11 PE=2 SV=1	KOG0527	2e-26	HMG-box transcription factor		GO:0048704;GO:0000979;GO:0060174;GO:0090263;GO:0072395;GO:0001841;GO:0045669;GO:0021510;GO:2000648;GO:0021782;GO:0014009;GO:0050769;GO:0030513;GO:0046887;GO:0035914;GO:0006351;GO:0003357;GO:0001105;GO:0048557;GO:0060563;GO:0061029;GO:0061303;GO:0048485;GO:0001077;GO:0002089;GO:0003151;GO:0045944;GO:0005737;GO:0061386;GO:0045666;GO:2001111;GO:0000122;GO:0001158;GO:0061053;GO:0060022;GO:0035332;GO:…	embryonic skeletal system morphogenesis|RNA polymerase II core promoter sequence-specific DNA binding|limb bud formation|positive regulation of canonical Wnt signaling pathway|signal transduction involved in cell cycle checkpoint|neural tube formation|positive regulation of osteoblast differentiation|spinal cord development|positive regulation of stem cell proliferation|glial cell development|gli…
CL15032Contig1	14.1154	26.4135	1.81726	0.0688003	-3.86144	0.0100458	0.419507	Down	gi|565356522|ref|XP_006345113.1|PREDICTED: protein SPIRAL1-like 1-like [Solanum tuberosum]	1.9431e-16	sp|Q7Y1L9|SP1L1_ORYSJ	7e-17	Protein SPIRAL1-like 1 OS=Oryza sativa subsp. japonica GN=Os03g0417800 PE=3 SV=1
CL15105Contig1	38.9934	61.6314	16.3553	0.265373	-1.91391	0.039337	0.837842	Down	gi|483515874|gb|EOB02967.1|hypothetical protein Anapl_05354 [Anas platyrhynchos]	1.50512e-17
CL15124Contig1	11.9142	22.0112	1.81726	0.0825604	-3.59841	0.0229033	0.648598	Down	gi|483517941|gb|EOB04320.1|Neighbor of punc e11, partial [Anas platyrhynchos]	0	sp|Q8TDY8|IGDC4_HUMAN	0	Immunoglobulin superfamily DCC subclass member 4 OS=Homo sapiens GN=IGDCC4 PE=1 SV=1	KOG4221	0	Receptor mediating netrin-dependent axon guidance
CL15125Contig1	6.05309	12.1062	0	0	#NAME?	0.0405318	0.846811	Down
CL15214Contig1	57.6519	88.0449	27.2588	0.309602	-1.69152	0.0492527	0.924655	Down
CL15262Contig1	21.5314	38.5196	4.54314	0.117943	-3.08383	0.00903356	0.397564	Down
CL15277Contig1	14.8576	29.7151	0	0	#NAME?	0.000509878	0.0588827	Down	gi|462407850|gb|EMJ13184.1|hypothetical protein PRUPE_ppa010953mg [Prunus persica]	4.53764e-17	sp|P46486|PSAF_FLATR	1e-22	Photosystem I reaction center subunit III, chloroplastic OS=Flaveria trinervia GN=PSAF PE=2 SV=1				ko00195, Photosynthesis;	GO:0010287;GO:0009941;GO:0009543;GO:0009538;GO:0015979;GO:0009535	plastoglobule|chloroplast envelope|chloroplast thylakoid lumen|photosystem I reaction center|photosynthesis|chloroplast thylakoid membrane
CL15323Contig1	25.6457	44.0224	7.26902	0.165121	-2.59841	0.0157102	0.531521	Down
CL15386Contig1	44.4512	82.5421	6.36039	0.0770564	-3.69794	0.000256789	0.0352305	Down
CL15387Contig1	70.5063	136.47	4.54314	0.0332905	-4.90875	1.71209e-06	0.000602834	Down
CL15395Contig1	5401.26	8074.82	2727.7	0.337803	-1.56574	0.00128137	0.112794	Down	gi|514749649|ref|XP_005020444.1|PREDICTED: LOW QUALITY PROTEIN: structural maintenance of chromosomes protein 2-like [Anas platyrhynchos]	0	sp|Q90988|SMC2_CHICK	0	Structural maintenance of chromosomes protein 2 OS=Gallus gallus GN=SMC2 PE=2 SV=1	KOG0933	0	Structural maintenance of chromosome protein 2 (chromosome condensation complex Condensin, subunit E)	ko04111, Cell cycle - yeast;	GO:0005829;GO:0006310;GO:0006281;GO:0000228;GO:0007076;GO:0005524;GO:0007062;GO:0000796;GO:0046982	cytosol|DNA recombination|DNA repair|nuclear chromosome|mitotic chromosome condensation|ATP binding|sister chromatid cohesion|condensin complex|protein heterodimerization activity
CL15435Contig1	40.4778	68.2348	12.7208	0.186427	-2.42332	0.0103056	0.4229	Down	gi|543379849|ref|XP_005533119.1|PREDICTED: nuclear receptor-binding protein 2 [Pseudopodoces humilis]	2.53775e-57	sp|Q91V36|NRBP2_MOUSE	3e-58	Nuclear receptor-binding protein 2 OS=Mus musculus GN=Nrbp2 PE=1 SV=2	KOG1266	4e-46	Protein kinase		GO:0006468;GO:0004672;GO:0016242;GO:0005524;GO:0043524;GO:0005737;GO:0030182	protein phosphorylation|protein kinase activity|negative regulation of macroautophagy|ATP binding|negative regulation of neuron apoptotic process|cytoplasm|neuron differentiation
CL15471Contig1	11.4599	22.0112	0.908628	0.0412802	-4.59841	0.0102468	0.422126	Down
CL1548Contig1	212.307	324.665	99.949	0.307852	-1.69969	0.0157004	0.531521	Down	gi|514778180|ref|XP_005027094.1|PREDICTED: uncharacterized protein LOC101794565 [Anas platyrhynchos]	2.78769e-33
CL15507Contig1	638.568	878.248	398.888	0.454186	-1.13865	0.0480788	0.916629	Down	gi|514745275|ref|XP_005019402.1|PREDICTED: extracellular sulfatase Sulf-1 isoform X2 [Anas platyrhynchos]	0	sp|Q90XB6|SULF1_COTCO	0	Extracellular sulfatase Sulf-1 OS=Coturnix coturnix GN=SULF1 PE=1 SV=1	KOG3731	0	Sulfatases		GO:0045121;GO:0048010;GO:0035860;GO:0016525;GO:0030513;GO:0030336;GO:0008449;GO:0060384;GO:0002063;GO:0060348;GO:0030177;GO:0032836;GO:0001502;GO:0005615;GO:0048706;GO:0005509;GO:0009986;GO:0048661;GO:0004065;GO:0001937;GO:0060686;GO:0005795;GO:0010575;GO:0030201;GO:0040037;GO:0003094;GO:0005783;GO:0005886;GO:0036022;GO:0060070;GO:0014846	membrane raft|vascular endothelial growth factor receptor signaling pathway|glial cell-derived neurotrophic factor receptor signaling pathway|negative regulation of angiogenesis|positive regulation of BMP signaling pathway|negative regulation of cell migration|N-acetylglucosamine-6-sulfatase activity|innervation|chondrocyte development|bone development|positive regulation of Wnt signaling pathway…
CL15533Contig1	1514.61	2041.54	987.678	0.483791	-1.04755	0.0411814	0.849457	Down	gi|514715661|ref|XP_005012605.1|PREDICTED: peroxidasin homolog [Anas platyrhynchos]	0	sp|Q3UQ28|PXDN_MOUSE	0	Peroxidasin homolog OS=Mus musculus GN=Pxdn PE=2 SV=2	KOG2408	0	Peroxidase/oxygenase		GO:0020037;GO:0004601;GO:0055114;GO:0006979	heme binding|peroxidase activity|oxidation-reduction process|response to oxidative stress
CL15544Contig1	117.127	197	37.2537	0.189105	-2.40274	0.0024255	0.170806	Down	gi|543748271|ref|XP_005514882.1|PREDICTED: LOW QUALITY PROTEIN: glutathione peroxidase 2 [Columba livia]	4.03801e-63	sp|Q4AEH9|GPX2_HYLLA	3e-64	Glutathione peroxidase 2 OS=Hylobates lar GN=GPX2 PE=2 SV=2	KOG1651	7e-65	Glutathione peroxidase	ko00590, Arachidonic acid metabolism;ko00480, Glutathione metabolism;ko04918, Thyroid hormone synthesis;
CL15556Contig1	14.2113	27.514	0.908628	0.0330242	-4.92033	0.00331645	0.210311	Down	gi|398363591|gb|AFO84090.1|sucrose synthase [Actinidia chinensis]	3.51853e-98	sp|P13708|SUSY_SOYBN	1e-112	Sucrose synthase OS=Glycine max GN=SS PE=1 SV=2	KOG0853	5e-106	Glycosyltransferase		GO:0009877;GO:0016157;GO:0009058;GO:0005985	nodulation|sucrose synthase activity|biosynthetic process|sucrose metabolic process
CL15558Contig1	24.7626	49.5252	0	0	#NAME?	1.34617e-05	0.00358395	Down
CL15564Contig1	3148.6	4394.54	1902.67	0.432961	-1.20769	0.0130211	0.480336	Down	gi|513228910|ref|XP_004937254.1|PREDICTED: nuclear pore complex protein Nup155 isoform X4 [Gallus gallus]	0	sp|O75694|NU155_HUMAN	0	Nuclear pore complex protein Nup155 OS=Homo sapiens GN=NUP155 PE=1 SV=1	KOG1900	0	Nuclear pore complex, Nup155 component (D Nup154, sc Nup157/Nup170)	ko03013, RNA transport;	GO:0017056;GO:0006998;GO:0006606;GO:0005643;GO:0086014;GO:0006406	structural constituent of nuclear pore|nuclear envelope organization|protein import into nucleus|nuclear pore|atrial cardiac muscle cell action potential|mRNA export from nucleus
CL15710Contig1	650.656	1251.34	49.9745	0.0399369	-4.64613	3.83991e-12	6.90015e-09	Down	gi|514772703|ref|XP_005025928.1|PREDICTED: zinc transporter 10 [Anas platyrhynchos]	8.52621e-156	sp|Q6XR72|ZNT10_HUMAN	2e-79	Zinc transporter 10 OS=Homo sapiens GN=SLC30A10 PE=2 SV=2	KOG1483	4e-70	Zn2+ transporter ZNT1 and related Cd2+/Zn2+ transporters (cation diffusion facilitator superfamily)		GO:0055085;GO:0016021;GO:0008324;GO:0005524;GO:0004812;GO:0006418;GO:0006812;GO:0005737	transmembrane transport|integral component of membrane|cation transmembrane transporter activity|ATP binding|aminoacyl-tRNA ligase activity|tRNA aminoacylation for protein translation|cation transport|cytoplasm
CL15711Contig1	29.3313	55.028	3.63451	0.0660483	-3.92033	0.000615267	0.0686902	Down
CL15713Contig1	6.05309	12.1062	0	0	#NAME?	0.0405318	0.846811	Down
CL15774Contig1	31.0526	53.9275	8.17765	0.151642	-2.72126	0.00790618	0.369623	Down
CL15817Contig1	16.1245	28.6146	3.63451	0.127016	-2.97692	0.0230283	0.64958	Down	gi|514767149|ref|XP_005024622.1|PREDICTED: ecto-ADP-ribosyltransferase 4 isoform X3 [Anas platyrhynchos]	5.25527e-06
CL15867Contig1	13.5651	25.3129	1.81726	0.0717917	-3.80004	0.0122944	0.46335	Down
CL15927Contig1	14.4737	25.3129	3.63451	0.143583	-2.80004	0.0384292	0.827488	Down
CL1599Contig1	14094.8	19581.2	8608.34	0.439623	-1.18566	0.0179122	0.577254	Down	gi|514707198|ref|XP_005010591.1|PREDICTED: SPARC isoform X2 [Anas platyrhynchos]	8.61674e-179	sp|O93390|SPRC_COTJA	0	SPARC OS=Coturnix coturnix japonica GN=SPARC PE=2 SV=1	KOG4004	0	Matricellular protein Osteonectin/SPARC/BM-40		GO:0005615;GO:0050840;GO:0042127;GO:0071363;GO:0005509;GO:0007165;GO:0005604;GO:0060348	extracellular space|extracellular matrix binding|regulation of cell proliferation|cellular response to growth factor stimulus|calcium ion binding|signal transduction|basement membrane|bone development
CL16129Contig1	24.0909	41.8213	6.36039	0.152085	-2.71705	0.0140528	0.496422	Down
CL1614Contig1	537.999	803.409	272.588	0.339289	-1.55941	0.0090702	0.397564	Down	gi|449266412|gb|EMC77465.1|Uroporphyrinogen decarboxylase, partial [Columba livia]	0	sp|Q8HY31|DCUP_SHEEP	0	Uroporphyrinogen decarboxylase OS=Ovis aries GN=UROD PE=1 SV=1	KOG2872	0	Uroporphyrinogen decarboxylase	ko00860, Porphyrin and chlorophyll metabolism;	GO:0004853;GO:0006782;GO:0005634;GO:0005829;GO:0015630	uroporphyrinogen decarboxylase activity|protoporphyrinogen IX biosynthetic process|nucleus|cytosol|microtubule cytoskeleton
CL1615Contig1	67.3456	121.062	13.6294	0.112582	-3.15095	0.000489347	0.0574338	Down
CL16172Contig1	15671.3	30044.2	1298.43	0.0432173	-4.53225	3.26762e-15	1.37106e-11	Down	gi|122310|sp|P04238.1|HBAD_ANSANRecName: Full=Hemoglobin subunit alpha-D; AltName: Full=Alpha-D-globin; AltName: Full=Hemoglobin alpha-D chain	1.24259e-51	sp|P04238|HBAD_ANSAN	2e-69	Hemoglobin subunit alpha-D OS=Anser anser anser GN=HBAD PE=1 SV=1	KOG3378	8e-46	Globins and related hemoproteins		GO:0020037;GO:0005833;GO:0005344;GO:0015671;GO:0005506;GO:0019825	heme binding|hemoglobin complex|oxygen transporter activity|oxygen transport|iron ion binding|oxygen binding
CL16214Contig1	25.121	48.4247	1.81726	0.0375275	-4.73591	0.000281326	0.0377734	Down
CL16245Contig1	29.7601	49.5252	9.9949	0.201814	-2.3089	0.0224353	0.644538	Down
CL16263Contig1	739.237	1053.24	425.238	0.403744	-1.30849	0.0207352	0.630458	Down	gi|514766819|ref|XP_005024540.1|PREDICTED: alpha-1A adrenergic receptor [Anas platyrhynchos]	0	sp|O02824|ADA1A_RABIT	0	Alpha-1A adrenergic receptor OS=Oryctolagus cuniculus GN=ADRA1A PE=2 SV=1	KOG3656	0	FOG: 7 transmembrane receptor	ko04020, Calcium signaling pathway;ko04022, cGMP - PKG signaling pathway;ko04152, AMPK signaling pathway;ko04080, Neuroactive ligand-receptor interaction;ko04261, Adrenergic signaling in cardiomyocytes;ko04270, Vascular smooth muscle contraction;ko04970, Salivary secretion;	GO:0097195;GO:0007200;GO:0035265;GO:0055117;GO:0031965;GO:0001985;GO:0001996;GO:0001994;GO:0019229;GO:0046982;GO:0045987;GO:0071875;GO:0016021;GO:0001997;GO:0016049;GO:0004937;GO:0043410;GO:0005886;GO:0007512	pilomotor reflex|phospholipase C-activating G-protein coupled receptor signaling pathway|organ growth|regulation of cardiac muscle contraction|nuclear membrane|negative regulation of heart rate involved in baroreceptor response to increased systemic arterial blood pressure|positive regulation of heart rate by epinephrine-norepinephrine|norepinephrine-epinephrine vasoconstriction involved in regul…
CL16287Contig1	12.6565	25.3129	0	0	#NAME?	0.00132996	0.11506	Down	gi|99082883|gb|ABC59068.2|alpha tubulin 1 [Camellia sinensis]	4.28082e-65	sp|Q9ZRB7|TBA_WHEAT	2e-82	Tubulin alpha chain OS=Triticum aestivum GN=TUBA PE=2 SV=1	KOG1376	3e-80	Alpha tubulin		GO:0005874;GO:0051258;GO:0006184;GO:0007018;GO:0003924;GO:0005200;GO:0005737;GO:0005525	microtubule|protein polymerization|GTP catabolic process|microtubule-based movement|GTPase activity|structural constituent of cytoskeleton|cytoplasm|GTP binding
CL16301Contig1	8.80449	17.609	0	0	#NAME?	0.0086999	0.388686	Down	gi|225448367|ref|XP_002268645.1|PREDICTED: 60S acidic ribosomal protein P0 [Vitis vinifera]	6.68758e-143	sp|P50346|RLA0_SOYBN	3e-175	60S acidic ribosomal protein P0 OS=Glycine max PE=1 SV=1	KOG0815	3e-175	60S acidic ribosomal protein P0	ko03010, Ribosome;	GO:0005507;GO:0005730;GO:0009651;GO:0009409;GO:0003735;GO:0003906;GO:0006414;GO:0042254;GO:0010043;GO:0009507;GO:0046686;GO:0022626;GO:0005886	copper ion binding|nucleolus|response to salt stress|response to cold|structural constituent of ribosome|DNA-(apurinic or apyrimidinic site) lyase activity|translational elongation|ribosome biogenesis|response to zinc ion|chloroplast|response to cadmium ion|cytosolic ribosome|plasma membrane
CL1630Contig1	131.332	203.604	59.0608	0.290077	-1.78549	0.0187901	0.593165	Down
CL16323Contig1	9.35477	18.7095	0	0	#NAME?	0.00653703	0.329146	Down	gi|260401128|gb|ACX37092.1|cyclophilin [Citrus sinensis] >gi|557525541|gb|ESR36847.1| hypothetical protein CICLE_v10029386mg [Citrus clementina]	1.08797e-81	sp|Q39613|CYPH_CATRO	4e-103	Peptidyl-prolyl cis-trans isomerase OS=Catharanthus roseus GN=PCKR1 PE=2 SV=1	KOG0865	6e-96	Cyclophilin type peptidyl-prolyl cis-trans isomerase		GO:0006457;GO:0046686;GO:0005886;GO:0000413;GO:0009507;GO:0048046;GO:0003755	protein folding|response to cadmium ion|plasma membrane|protein peptidyl-prolyl isomerization|chloroplast|apoplast|peptidyl-prolyl cis-trans isomerase activity
CL16449Contig1	407.71	570.091	245.329	0.430334	-1.21647	0.0495934	0.928628	Down	gi|514728161|ref|XP_005015575.1|PREDICTED: denticleless protein homolog [Anas platyrhynchos]	0	sp|Q5ZJW8|DTL_CHICK	0	Denticleless protein homolog OS=Gallus gallus GN=DTL PE=2 SV=1	KOG0321	0	WD40 repeat-containing protein L2DTL		GO:0009411;GO:0006511;GO:0031572;GO:0000209;GO:0051726;GO:0006260;GO:0006513;GO:0031465;GO:0005813;GO:0031464;GO:0004842;GO:0019985;GO:0005737;GO:0005634	response to UV|ubiquitin-dependent protein catabolic process|G2 DNA damage checkpoint|protein polyubiquitination|regulation of cell cycle|DNA replication|protein monoubiquitination|Cul4B-RING E3 ubiquitin ligase complex|centrosome|Cul4A-RING E3 ubiquitin ligase complex|ubiquitin-protein transferase activity|translesion synthesis|cytoplasm|nucleus
CL16496Contig1	41.6294	81.4415	1.81726	0.0223136	-5.48593	5.937e-06	0.00183395	Down
CL16525Contig1	13.757	27.514	0	0	#NAME?	0.00081577	0.0818224	Down
CL16538Contig1	2871.24	4813.85	928.617	0.192905	-2.37404	2.75522e-06	0.000937353	Down	gi|513220472|ref|XP_417682.2|PREDICTED: mitoferrin-1 [Gallus gallus]	2.25981e-158	sp|Q66H23|MFRN1_RAT	3e-159	Mitoferrin-1 OS=Rattus norvegicus GN=Slc25a37 PE=2 SV=1	KOG0760	8e-132	Mitochondrial carrier protein MRS3/4		GO:0055085;GO:0016021	transmembrane transport|integral component of membrane
CL16611Contig1	23.1822	41.8213	4.54314	0.108632	-3.20248	0.00583951	0.31246	Down
CL16669Contig1	7.70393	15.4079	0	0	#NAME?	0.0157289	0.531521	Down
CL16727Contig1	27.0342	49.5252	4.54314	0.0917338	-3.4464	0.00221755	0.160484	Down
CL16792Contig1	9.90505	19.8101	0	0	#NAME?	0.00494298	0.277831	Down
CL16800Contig1	12.1062	24.2123	0	0	#NAME?	0.00171094	0.136744	Down
CL16965Contig1	33.1577	57.2292	9.08628	0.15877	-2.65499	0.00809349	0.37559	Down
CL16969Contig1	328.968	479.845	178.091	0.371143	-1.42995	0.0269452	0.709908	Down	gi|449495811|ref|XP_002191675.2|PREDICTED: vasohibin-2 [Taeniopygia guttata]	1.39202e-147	sp|Q86V25|VASH2_HUMAN	3e-156	Vasohibin-2 OS=Homo sapiens GN=VASH2 PE=1 SV=2					GO:0001938;GO:0045766;GO:0005737	positive regulation of endothelial cell proliferation|positive regulation of angiogenesis|cytoplasm
CL16972Contig1	12.3686	22.0112	2.72588	0.123841	-3.01344	0.0411285	0.848713	Down	gi|557294094|ref|XP_006029499.1|PREDICTED: collagen alpha-1(VIII) chain-like [Alligator sinensis] >gi|564254216|ref|XP_006266101.1| PREDICTED: collagen alpha-1(VIII) chain-like [Alligator mississippiensis]	6.35512e-08	sp|P27658|CO8A1_HUMAN	4e-08	Collagen alpha-1(VIII) chain OS=Homo sapiens GN=COL8A1 PE=1 SV=2	KOG3544	2e-08	Collagens (type IV and type XIII), and related proteins
CL17096Contig1	15.024	26.4135	3.63451	0.137601	-2.86144	0.0323623	0.765805	Down
CL1713Contig1	204.264	294.95	113.578	0.385077	-1.37678	0.0497589	0.929651	Down
CL17153Contig1	21.7938	36.3185	7.26902	0.200146	-2.32087	0.0377532	0.820773	Down
CL17195Contig1	8.80449	17.609	0	0	#NAME?	0.0086999	0.388686	Down
CL17198Contig1	29.5681	47.3241	11.8122	0.249601	-2.0023	0.0448284	0.883792	Down
CL1719Contig1	42.0837	81.4415	2.72588	0.0334704	-4.90097	1.7055e-05	0.00425762	Down
CL17206Contig1	34.6677	69.3353	0	0	#NAME?	8.59014e-07	0.000335289	Down
CL17226Contig1	187.57	280.643	94.4973	0.336717	-1.57039	0.0281426	0.714938	Down	gi|529431985|ref|XP_005235789.1|PREDICTED: DNA polymerase delta subunit 2 [Falco peregrinus]	2.98978e-58	sp|P49004|DPOD2_BOVIN	1e-60	DNA polymerase delta subunit 2 OS=Bos taurus GN=POLD2 PE=1 SV=2	KOG2732	7e-61	DNA polymerase delta, regulatory subunit 55		GO:0003887;GO:0006260;GO:0003677;GO:0005634	DNA-directed DNA polymerase activity|DNA replication|DNA binding|nucleus
CL17305Contig1	14.4737	25.3129	3.63451	0.143583	-2.80004	0.0384292	0.827488	Down
CL17310Contig1	8.15824	15.4079	0.908628	0.0589717	-4.08383	0.0448605	0.883792	Down
CL17333Contig1	16.4124	31.9163	0.908628	0.0284691	-5.13446	0.00142846	0.121289	Down
CL17340Contig1	18.1593	36.3185	0	0	#NAME?	0.000135659	0.0222494	Down
CL17393Contig1	21.4354	37.4191	5.45177	0.145695	-2.77898	0.0162807	0.542163	Down
CL17410Contig1	42.8964	80.3409	5.45177	0.0678579	-3.88134	0.000175642	0.0270451	Down
CL17473Contig1	777.835	1068.64	487.024	0.45574	-1.13372	0.0427034	0.863518	Down	gi|514779418|ref|XP_005027375.1|PREDICTED: kinesin-like protein KIF14 [Anas platyrhynchos]	0	sp|Q15058|KIF14_HUMAN	0	Kinesin-like protein KIF14 OS=Homo sapiens GN=KIF14 PE=1 SV=1	KOG0245	0	Kinesin-like protein		GO:0008017;GO:0007018;GO:0005524;GO:0005871;GO:0003777;GO:0005874	microtubule binding|microtubule-based movement|ATP binding|kinesin complex|microtubule motor activity|microtubule
CL17496Contig1	171.618	269.637	73.5988	0.272955	-1.87327	0.0105525	0.429531	Down
CL17517Contig1	23.5406	40.7208	6.36039	0.156195	-2.67858	0.0160095	0.537932	Down	gi|363736300|ref|XP_422069.3|PREDICTED: insulin-like growth factor binding protein 5 isoform X2 [Gallus gallus]	4.91209e-27	sp|P24593|IBP5_HUMAN	8e-26	Insulin-like growth factor-binding protein 5 OS=Homo sapiens GN=IGFBP5 PE=1 SV=1					GO:0017148;GO:0001649;GO:0043568;GO:0048662;GO:0001558;GO:0051146;GO:0005576;GO:0031069;GO:0044342;GO:0014912;GO:0031994;GO:0045668;GO:0006006;GO:0071320;GO:0051897;GO:0001968;GO:0060056;GO:0043569;GO:0010906;GO:0042593	negative regulation of translation|osteoblast differentiation|positive regulation of insulin-like growth factor receptor signaling pathway|negative regulation of smooth muscle cell proliferation|regulation of cell growth|striated muscle cell differentiation|extracellular region|hair follicle morphogenesis|type B pancreatic cell proliferation|negative regulation of smooth muscle cell migration|ins…
CL17521Contig1	12.9188	23.1118	2.72588	0.117943	-3.08383	0.0339631	0.786377	Down
CL17588Contig1	9.80908	18.7095	0.908628	0.0485649	-4.36394	0.0210784	0.635901	Down
CL17590Contig1	15.6702	28.6146	2.72588	0.095262	-3.39196	0.0134186	0.490661	Down	gi|558200939|ref|XP_006131497.1|PREDICTED: CAP-Gly domain-containing linker protein 3 [Pelodiscus sinensis]	2.67275e-43	sp|Q5R686|CLIP3_PONAB	1e-50	CAP-Gly domain-containing linker protein 3 OS=Pongo abelii GN=CLIP3 PE=2 SV=1	KOG4568	3e-51	Cytoskeleton-associated protein and related proteins		GO:0001934;GO:0045121;GO:0055038;GO:0090004;GO:0032588;GO:0045444;GO:0008017;GO:0018230;GO:0043065;GO:0005795;GO:0044091;GO:0031115;GO:0035594;GO:0010828;GO:0045807;GO:0072321;GO:0005886;GO:0031901	positive regulation of protein phosphorylation|membrane raft|recycling endosome membrane|positive regulation of establishment of protein localization to plasma membrane|trans-Golgi network membrane|fat cell differentiation|microtubule binding|peptidyl-L-cysteine S-palmitoylation|positive regulation of apoptotic process|Golgi stack|membrane biogenesis|negative regulation of microtubule polymerizat…
CL17596Contig1	8.25421	16.5084	0	0	#NAME?	0.0116562	0.4487	Down
CL1763Contig1	97.6498	150.777	44.5228	0.295289	-1.7598	0.0265424	0.706361	Down
CL17643Contig1	10.2634	18.7095	1.81726	0.0971299	-3.36394	0.0436618	0.870587	Down
CL17675Contig1	11.9142	22.0112	1.81726	0.0825604	-3.59841	0.0229033	0.648598	Down
CL17691Contig1	20.1684	38.5196	1.81726	0.0471774	-4.40576	0.00126332	0.112649	Down
CL17723Contig1	18.684	31.9163	5.45177	0.170815	-2.5495	0.0333826	0.7807	Down
CL17725Contig1	23.3486	38.5196	8.17765	0.212298	-2.23584	0.0395066	0.838822	Down	gi|483516849|gb|EOB03549.1|hypothetical protein Anapl_02223 [Anas platyrhynchos]	5.23407e-06
CL17772Contig1	4353.22	5934.22	2772.22	0.467158	-1.09802	0.0224404	0.644538	Down	gi|483517660|gb|EOB04105.1|Lymphoid-specific helicase, partial [Anas platyrhynchos]	0	sp|Q9NRZ9|HELLS_HUMAN	0	Lymphoid-specific helicase OS=Homo sapiens GN=HELLS PE=1 SV=1	KOG0385	0	Chromatin remodeling complex WSTF-ISWI, small subunit		GO:0006346;GO:0043066;GO:0046651;GO:0010216;GO:0001655;GO:0004386;GO:0003677;GO:0031508;GO:0003682;GO:0005634;GO:0005524;GO:0005721	methylation-dependent chromatin silencing|negative regulation of apoptotic process|lymphocyte proliferation|maintenance of DNA methylation|urogenital system development|helicase activity|DNA binding|centromeric heterochromatin assembly|chromatin binding|nucleus|ATP binding|centromeric heterochromatin
CL17908Contig1	16.6748	29.7151	3.63451	0.122312	-3.03137	0.0194608	0.604212	Down
CL17914Contig1	12.3686	22.0112	2.72588	0.123841	-3.01344	0.0411285	0.848713	Down
CL17996Contig1	6.05309	12.1062	0	0	#NAME?	0.0405318	0.846811	Down	gi|483507525|gb|EOA98040.1|Aquaporin-11, partial [Anas platyrhynchos]	1.25673e-108	sp|Q8NBQ7|AQP11_HUMAN	7e-52	Aquaporin-11 OS=Homo sapiens GN=AQP11 PE=2 SV=1					GO:0016021;GO:0015250;GO:0048388;GO:0009986;GO:0072014;GO:0006833;GO:0005783	integral component of membrane|water channel activity|endosomal lumen acidification|cell surface|proximal tubule development|water transport|endoplasmic reticulum
CL18015Contig1	12.9188	23.1118	2.72588	0.117943	-3.08383	0.0339631	0.786377	Down
CL18096Contig1	15.9581	31.9163	0	0	#NAME?	0.00032357	0.041882	Down	gi|225443988|ref|XP_002280687.1|PREDICTED: photosystem I reaction center subunit psaK, chloroplastic [Vitis vinifera] >gi|297740792|emb|CBI30974.3| unnamed protein product [Vitis vinifera]	1.24016e-51	sp|Q9SUI5|PSAK_ARATH	2e-60	Photosystem I reaction center subunit psaK, chloroplastic OS=Arabidopsis thaliana GN=PSAK PE=2 SV=2				ko00195, Photosynthesis;	GO:0016168;GO:0009522;GO:0009535;GO:0030003;GO:0015979;GO:0070838;GO:0019344	chlorophyll binding|photosystem I|chloroplast thylakoid membrane|cellular cation homeostasis|photosynthesis|divalent metal ion transport|cysteine biosynthetic process
CL18111Contig1	35.5253	58.3297	12.7208	0.218084	-2.19704	0.0221673	0.642775	Down
CL18138Contig1	20.3604	40.7208	0	0	#NAME?	5.98759e-05	0.0116853	Down	gi|330318808|gb|AEC11064.1|photosystem I reaction center V, partial (chloroplast) [Camellia sinensis]	2.01228e-71	sp|P12357|PSAG_SPIOL	8e-62	Photosystem I reaction center subunit V, chloroplastic OS=Spinacia oleracea GN=PSAG PE=1 SV=1				ko00195, Photosynthesis;	GO:0016168;GO:0009773;GO:0009941;GO:0050821;GO:0042550;GO:0030003;GO:0030093;GO:0070838;GO:0019344;GO:0009780	chlorophyll binding|photosynthetic electron transport in photosystem I|chloroplast envelope|protein stabilization|photosystem I stabilization|cellular cation homeostasis|chloroplast photosystem I|divalent metal ion transport|cysteine biosynthetic process|photosynthetic NADP+ reduction
CL18164Contig1	205.32	307.056	103.584	0.337344	-1.56771	0.0261099	0.698669	Down
CL18198Contig1	22.9198	44.0224	1.81726	0.0412802	-4.59841	0.000536779	0.0608724	Down
CL1821Contig1	68.1072	108.956	27.2588	0.250183	-1.99894	0.0184486	0.589034	Down	gi|449274475|gb|EMC83617.1|hypothetical protein A306_08216 [Columba livia]	7.05732e-09
CL18257Contig1	30.4063	51.7264	9.08628	0.17566	-2.50914	0.0136084	0.4958	Down	gi|542152307|ref|XP_005485049.1|PREDICTED: Kv channel-interacting protein 4 isoform X15 [Zonotrichia albicollis] >gi|543343317|ref|XP_005517864.1| PREDICTED: Kv channel-interacting protein 4 isoform X6 [Pseudopodoces humilis]	4.09705e-85	sp|Q99MG9|KCIP4_RAT	5e-108	Kv channel-interacting protein 4 OS=Rattus norvegicus GN=Kcnip4 PE=1 SV=1	KOG0044	1e-108	Ca2+ sensor (EF-Hand superfamily)		GO:0005509	calcium ion binding
CL18334Contig1	2380.97	3312.69	1449.26	0.437488	-1.19269	0.0157842	0.53303	Down
CL18417Contig1	46.2685	82.5421	9.9949	0.121089	-3.04587	0.00145085	0.122776	Down
CL18426Contig1	18.1593	36.3185	0	0	#NAME?	0.000135659	0.0222494	Down	gi|330318556|gb|AEC10950.1|histone H2A [Camellia sinensis]	8.9466e-40	sp|Q6L500|H2A4_ORYSJ	3e-51	Probable histone H2A.4 OS=Oryza sativa subsp. japonica GN=Os05g0461400 PE=2 SV=1	KOG1756	2e-47	Histone 2A	ko05322, Systemic lupus erythematosus;ko05034, Alcoholism;	GO:0000786;GO:0005730;GO:0003677;GO:0006334;GO:0046982	nucleosome|nucleolus|DNA binding|nucleosome assembly|protein heterodimerization activity
CL18474Contig1	37.9888	60.5309	15.4467	0.255187	-1.97037	0.035315	0.798886	Down
CL18492Contig1	12.9188	23.1118	2.72588	0.117943	-3.08383	0.0339631	0.786377	Down
CL18495Contig1	40.8616	72.637	9.08628	0.125092	-2.99894	0.00214569	0.158879	Down
CL18538Contig1	1566.54	2267.16	865.922	0.381942	-1.38857	0.00702971	0.34532	Down	gi|224058133|ref|XP_002196270.1|PREDICTED: T-cell acute lymphocytic leukemia protein 1 homolog [Taeniopygia guttata]	2.01056e-102	sp|P24899|TAL1_CHICK	3e-121	T-cell acute lymphocytic leukemia protein 1 homolog OS=Gallus gallus GN=TAL1 PE=2 SV=1	KOG4029	2e-85	Transcription factor HAND2/Transcription factor TAL1/TAL2/LYL1		GO:0001525;GO:0051781;GO:0000980;GO:0000122;GO:0042127;GO:0007626;GO:0042826;GO:0033193;GO:0006366;GO:0035855;GO:0030221;GO:0060217;GO:0043249;GO:0060375;GO:0045931;GO:0060218;GO:0045799;GO:0000981;GO:0046982;GO:0005667;GO:0060018;GO:0060216;GO:0031334;GO:0021527;GO:2000036;GO:0001085;GO:0000118;GO:0045648;GO:0000790;GO:0045944;GO:0003682;GO:0030220;GO:0070888	angiogenesis|positive regulation of cell division|RNA polymerase II distal enhancer sequence-specific DNA binding|negative regulation of transcription from RNA polymerase II promoter|regulation of cell proliferation|locomotory behavior|histone deacetylase binding|Lsd1/2 complex|transcription from RNA polymerase II promoter|megakaryocyte development|basophil differentiation|hemangioblast cell diff…
CL18564Contig1	19.2598	38.5196	0	0	#NAME?	8.9564e-05	0.0160485	Down	gi|502131705|ref|XP_004501073.1|PREDICTED: tubulin alpha chain-like [Cicer arietinum]	9.34997e-47	sp|P33629|TBA_PRUDU	6e-59	Tubulin alpha chain OS=Prunus dulcis GN=TUBA PE=2 SV=1	KOG1376	1e-59	Alpha tubulin		GO:0000226;GO:0006094;GO:0005515;GO:0071258;GO:0005773;GO:0045298;GO:0009651;GO:0010498;GO:0000902;GO:0005525;GO:0005618;GO:0006184;GO:0005730;GO:0005829;GO:0005874;GO:0051258;GO:0048193;GO:0009506;GO:0016049;GO:0003924;GO:0005886;GO:0005200	microtubule cytoskeleton organization|gluconeogenesis|protein binding|cellular response to gravity|vacuole|tubulin complex|response to salt stress|proteasomal protein catabolic process|cell morphogenesis|GTP binding|cell wall|GTP catabolic process|nucleolus|cytosol|microtubule|protein polymerization|Golgi vesicle transport|plasmodesma|cell growth|GTPase activity|plasma membrane|structural constit…
CL18702Contig1	1636.47	2240.74	1032.2	0.460651	-1.11825	0.0282286	0.715742	Down	gi|513192397|ref|XP_004942416.1|PREDICTED: antigen KI-67 isoform X6 [Gallus gallus]	0	sp|P46013|KI67_HUMAN	2e-37	Antigen KI-67 OS=Homo sapiens GN=MKI67 PE=1 SV=2	KOG1911	3e-09	Heterochromatin-associated protein HP1 and related CHROMO domain proteins		GO:0003677	DNA binding
CL18721Contig1	103.773	158.481	49.0659	0.309602	-1.69152	0.0310097	0.75721	Down
CL18757Contig1	14.6656	27.514	1.81726	0.0660483	-3.92033	0.00823076	0.378843	Down
CL18760Contig1	15.4079	30.8157	0	0	#NAME?	0.000405485	0.0495548	Down	gi|511487196|gb|AGN74808.1|sulfotransferase family 3A member 1-like protein, partial [Anas platyrhynchos]	8.7003e-65	sp|O46640|ST3A1_RABIT	6e-54	Amine sulfotransferase OS=Oryctolagus cuniculus GN=SULT3A1 PE=1 SV=1	KOG1584	2e-34	Sulfotransferase		GO:0008146	sulfotransferase activity
CL18773Contig1	21.9857	38.5196	5.45177	0.141532	-2.8208	0.014148	0.496422	Down
CL18852Contig1	13.0148	24.2123	1.81726	0.0750549	-3.73591	0.0150871	0.51788	Down
CL18856Contig1	67.0771	102.352	31.802	0.310711	-1.68635	0.0448139	0.883792	Down
CL18865Contig1	1784.93	2395.92	1173.95	0.489977	-1.02921	0.0413191	0.850904	Down	gi|514711722|ref|XP_005011657.1|PREDICTED: proteinase-activated receptor 1, partial [Anas platyrhynchos]	0	sp|P25116|PAR1_HUMAN	1e-124	Proteinase-activated receptor 1 OS=Homo sapiens GN=F2R PE=1 SV=2	KOG3656	1e-28	FOG: 7 transmembrane receptor	ko04810, Regulation of actin cytoskeleton;ko04144, Endocytosis;ko04015, Rap1 signaling pathway;ko04020, Calcium signaling pathway;ko04024, cAMP signaling pathway;ko04151, PI3K-Akt signaling pathway;ko04080, Neuroactive ligand-receptor interaction;ko04610, Complement and coagulation cascades;ko04611, Platelet activation;	GO:0016021;GO:0015057;GO:0007596	integral component of membrane|thrombin receptor activity|blood coagulation
CL1891Contig1	60.0255	110.056	9.9949	0.0908164	-3.4609	0.000234046	0.0330024	Down
CL18922Contig1	1713.81	2518.08	909.536	0.361202	-1.46912	0.00407997	0.242539	Down	gi|514786288|ref|XP_005028988.1|PREDICTED: M-phase inducer phosphatase 1-like [Anas platyrhynchos]	0	sp|P30304|MPIP1_HUMAN	7e-177	M-phase inducer phosphatase 1 OS=Homo sapiens GN=CDC25A PE=1 SV=2	KOG3772	2e-176	M-phase inducer phosphatase	ko04110, Cell cycle;ko05206, MicroRNAs in cancer;ko04914, Progesterone-mediated oocyte maturation;	GO:0005737;GO:0004725;GO:0034644;GO:0035335;GO:0019901;GO:0005634	cytoplasm|protein tyrosine phosphatase activity|cellular response to UV|peptidyl-tyrosine dephosphorylation|protein kinase binding|nucleus
CL18976Contig1	11.9142	22.0112	1.81726	0.0825604	-3.59841	0.0229033	0.648598	Down
CL19018Contig1	8.70852	16.5084	0.908628	0.0550403	-4.18337	0.0347419	0.796943	Down
CL19041Contig1	203.644	298.252	109.035	0.365581	-1.45174	0.0390347	0.833789	Down	gi|543372392|ref|XP_005529416.1|PREDICTED: high mobility group protein HMG-I/HMG-Y isoform X1 [Pseudopodoces humilis]	3.77476e-21	sp|Q8K585|HMGA1_RAT	9e-15	High mobility group protein HMG-I/HMG-Y OS=Rattus norvegicus GN=Hmga1 PE=1 SV=3
CL19043Contig1	12.6565	25.3129	0	0	#NAME?	0.00132996	0.11506	Down
CL19071Contig1	33.4456	60.5309	6.36039	0.105077	-3.25048	0.00182791	0.142213	Down
CL19096Contig1	19.8805	35.2179	4.54314	0.129001	-2.95455	0.0141447	0.496422	Down
CL19173Contig1	11.4599	22.0112	0.908628	0.0412802	-4.59841	0.0102468	0.422126	Down
CL19227Contig1	12.0102	23.1118	0.908628	0.0393145	-4.6688	0.00811666	0.375972	Down	gi|462411887|gb|EMJ16936.1|hypothetical protein PRUPE_ppa009110mg [Prunus persica]	3.08954e-86	sp|P27522|CB13_SOLLC	4e-101	Chlorophyll a-b binding protein 8, chloroplastic OS=Solanum lycopersicum GN=CAB8 PE=3 SV=1				ko00196, Photosynthesis - antenna proteins;	GO:0016168;GO:0030076;GO:0046872;GO:0009535;GO:0010287;GO:0009765;GO:0019344	chlorophyll binding|light-harvesting complex|metal ion binding|chloroplast thylakoid membrane|plastoglobule|photosynthesis, light harvesting|cysteine biosynthetic process
CL19263Contig1	21.4354	37.4191	5.45177	0.145695	-2.77898	0.0162807	0.542163	Down
CL19380Contig1	4452.02	6233.58	2670.46	0.428399	-1.22297	0.0111988	0.443242	Down	gi|514792244|ref|XP_005030407.1|PREDICTED: DNA topoisomerase 2-alpha [Anas platyrhynchos]	0	sp|O42130|TOP2A_CHICK	0	DNA topoisomerase 2-alpha OS=Gallus gallus GN=TOP2A PE=2 SV=2	KOG0355	0	DNA topoisomerase type II		GO:0005080;GO:0045870;GO:0005654;GO:0006312;GO:0000819;GO:0042826;GO:0006261;GO:0008144;GO:0005814;GO:0008022;GO:0009295;GO:0000712;GO:0040016;GO:0006974;GO:0006265;GO:0043130;GO:0005730;GO:0046982;GO:0009330;GO:0000795;GO:0006266;GO:0043065;GO:0000287;GO:0030263;GO:0045944;GO:0042803;GO:0003682;GO:0005524;GO:0003918;GO:0008301	protein kinase C binding|positive regulation of single stranded viral RNA replication via double stranded DNA intermediate|nucleoplasm|mitotic recombination|sister chromatid segregation|histone deacetylase binding|DNA-dependent DNA replication|drug binding|centriole|protein C-terminus binding|nucleoid|resolution of meiotic recombination intermediates|embryonic cleavage|cellular response to DNA da…
CL19402Contig1	19.1383	31.9163	6.36039	0.199284	-2.3271	0.0470303	0.903136	Down
CL1947Contig1	102.961	159.581	46.34	0.290385	-1.78396	0.0235067	0.653914	Down
CL19496Contig1	15.4783	26.4135	4.54314	0.172001	-2.53951	0.0492366	0.924655	Down
CL19503Contig1	13.9234	24.2123	3.63451	0.15011	-2.73591	0.0456961	0.886646	Down
CL19534Contig1	30.6942	55.028	6.36039	0.115585	-3.11298	0.00321268	0.207387	Down
CL19540Contig1	17.8714	33.0168	2.72588	0.0825604	-3.59841	0.00658147	0.329735	Down						KOG0227	6e-06	Splicing factor 3a, subunit 2
CL19541Contig1	19.6886	33.0168	6.36039	0.192641	-2.37601	0.0409802	0.848713	Down
CL19576Contig1	19.8805	35.2179	4.54314	0.129001	-2.95455	0.0141447	0.496422	Down
CL19599Contig1	17.9673	34.1174	1.81726	0.0532648	-4.23067	0.00260551	0.181703	Down
CL19641Contig1	9.2588	17.609	0.908628	0.0516003	-4.27648	0.0270094	0.709908	Down	gi|378405608|gb|AFB82643.1|aquaporin [Camellia sinensis]	3.7184e-72	sp|P42767|PIP1_ATRCA	1e-86	Aquaporin PIP-type OS=Atriplex canescens PE=2 SV=1	KOG0223	6e-86	Aquaporin (major intrinsic protein family)		GO:0016021;GO:0006810;GO:0005215	integral component of membrane|transport|transporter activity
CL19805Contig1	19.4262	35.2179	3.63451	0.103201	-3.27648	0.00856033	0.38733	Down
CL19824Contig1	16.0286	27.514	4.54314	0.165121	-2.59841	0.0419819	0.854721	Down
CL19845Contig1	34.8086	60.5309	9.08628	0.15011	-2.73591	0.0059929	0.315164	Down
CL19883Contig1	16.8668	31.9163	1.81726	0.0569382	-4.13446	0.00379079	0.230798	Down	gi|513226427|ref|XP_003642875.2|PREDICTED: serine/threonine-protein kinase WNK4 [Gallus gallus]	1.63325e-59	sp|Q96J92|WNK4_HUMAN	2e-38	Serine/threonine-protein kinase WNK4 OS=Homo sapiens GN=WNK4 PE=1 SV=1	KOG0584	5e-39	Serine/threonine protein kinase		GO:0006468;GO:0005524;GO:0004674	protein phosphorylation|ATP binding|protein serine/threonine kinase activity
CL19884Contig1	74.7105	122.162	27.2588	0.223136	-2.164	0.0101691	0.422115	Down
CL19891Contig1	28.9474	50.6258	7.26902	0.143583	-2.80004	0.00769461	0.363347	Down
CL19895Contig1	14.3073	28.6146	0	0	#NAME?	0.000643491	0.0693799	Down
CL19906Contig1	23.3486	38.5196	8.17765	0.212298	-2.23584	0.0395066	0.838822	Down
CL19963Contig1	1485.95	2405.83	566.075	0.235293	-2.08747	8.01282e-05	0.0148328	Down	gi|529422232|ref|XP_005230968.1|PREDICTED: anion exchange protein 2 [Falco peregrinus]	0	sp|Q6SJP2|B3A2_HORSE	0	Anion exchange protein 2 OS=Equus caballus GN=SLC4A2 PE=2 SV=1	KOG1172	0	Na+-independent Cl/HCO3 exchanger AE1 and related transporters (SLC4 family)	ko04970, Salivary secretion;ko04971, Gastric acid secretion;ko04972, Pancreatic secretion;ko04976, Bile secretion;	GO:0016021;GO:0005452;GO:0006820	integral component of membrane|inorganic anion exchanger activity|anion transport
CL20016Contig1	245.081	377.492	112.67	0.298469	-1.74435	0.0111496	0.443242	Down	gi|483514006|gb|EOB01847.1|WW domain-binding protein 4, partial [Anas platyrhynchos]	4.77972e-27	sp|Q5F457|WBP4_CHICK	1e-33	WW domain-binding protein 4 OS=Gallus gallus GN=WBP4 PE=2 SV=1	KOG0150	6e-28	Spliceosomal protein FBP21		GO:0070064;GO:0003676;GO:0005681;GO:0005886;GO:0045292;GO:0016607;GO:0008270	proline-rich region binding|nucleic acid binding|spliceosomal complex|plasma membrane|mRNA cis splicing, via spliceosome|nuclear speck|zinc ion binding
CL20115Contig1	228.54	396.202	60.878	0.153654	-2.70224	0.000186545	0.0282914	Down	gi|524899466|ref|XP_005106164.1|PREDICTED: dentin sialophosphoprotein-like [Aplysia californica]	1.13137e-07
CL2021Contig1	385.031	695.555	74.5075	0.10712	-3.22271	1.83796e-06	0.000642659	Down
CL20228Contig1	12.4645	23.1118	1.81726	0.078629	-3.6688	0.0185641	0.589728	Down	gi|449277086|gb|EMC85384.1|hypothetical protein A306_06194 [Columba livia]	1.24558e-11
CL20229Contig1	24.7626	49.5252	0	0	#NAME?	1.34617e-05	0.00358395	Down
CL20289Contig1	511.65	725.27	298.03	0.410923	-1.28306	0.0319144	0.761936	Down	gi|514756556|ref|XP_005022102.1|PREDICTED: kinesin-like protein KIF18A, partial [Anas platyrhynchos]	0	sp|Q8NI77|KI18A_HUMAN	0	Kinesin-like protein KIF18A OS=Homo sapiens GN=KIF18A PE=1 SV=2	KOG0242	0	Kinesin-like protein		GO:0007019;GO:0001726;GO:0051010;GO:0005901;GO:0007080;GO:0043130;GO:0070463;GO:0005524;GO:0007018;GO:0003779;GO:0005871;GO:0005828;GO:0005737;GO:0008574;GO:0005634	microtubule depolymerization|ruffle|microtubule plus-end binding|caveola|mitotic metaphase plate congression|ubiquitin binding|tubulin-dependent ATPase activity|ATP binding|microtubule-based movement|actin binding|kinesin complex|kinetochore microtubule|cytoplasm|plus-end-directed microtubule motor activity|nucleus
CL20314Contig1	17.5835	29.7151	5.45177	0.183468	-2.4464	0.044785	0.883792	Down
CL20356Contig1	59.1363	94.6482	23.6243	0.249601	-2.0023	0.0209019	0.633612	Down
CL20362Contig1	12.9188	23.1118	2.72588	0.117943	-3.08383	0.0339631	0.786377	Down
CL20403Contig1	21.8193	41.8213	1.81726	0.0434528	-4.52441	0.000751034	0.077241	Down
CL20510Contig1	37.0801	60.5309	13.6294	0.225165	-2.15095	0.023407	0.65306	Down
CL20519Contig1	28.2052	47.3241	9.08628	0.192001	-2.38081	0.0209593	0.63497	Down
CL20554Contig1	1515.68	2173.61	857.744	0.394618	-1.34147	0.00937791	0.400838	Down	gi|514793514|ref|XP_005030702.1|PREDICTED: LOW QUALITY PROTEIN: integrin beta-3-like [Anas platyrhynchos]	0	sp|P05106|ITB3_HUMAN	0	Integrin beta-3 OS=Homo sapiens GN=ITGB3 PE=1 SV=2	KOG1226	0	Integrin beta subunit (N-terminal portion of extracellular region)	ko04810, Regulation of actin cytoskeleton;ko04510, Focal adhesion;ko04145, Phagosome;ko04015, Rap1 signaling pathway;ko04151, PI3K-Akt signaling pathway;ko04512, ECM-receptor interaction;ko05205, Proteoglycans in cancer;ko05206, MicroRNAs in cancer;ko05410, Hypertrophic cardiomyopathy (HCM);ko05412, Arrhythmogenic right ventricular cardiomyopathy (ARVC);ko05414, Dilated cardiomyopathy (DCM);ko043…	GO:0005925;GO:0019048;GO:0003756;GO:0016324;GO:0030949;GO:0007160;GO:0035295;GO:0007411;GO:0010595;GO:0050748;GO:0070527;GO:0032147;GO:0004872;GO:0005178;GO:0043184;GO:0005161;GO:0045715;GO:0031258;GO:0060055;GO:0045124;GO:0071062;GO:0050900;GO:0050731;GO:0031092;GO:0071133;GO:0002576;GO:0042802;GO:0008270;GO:0009897;GO:0030198;GO:0032369;GO:0042470;GO:0007229;GO:0007044;GO:0014909;GO:0005634;GO:…	focal adhesion|modulation by virus of host morphology or physiology|protein disulfide isomerase activity|apical plasma membrane|positive regulation of vascular endothelial growth factor receptor signaling pathway|cell-matrix adhesion|tube development|axon guidance|positive regulation of endothelial cell migration|negative regulation of lipoprotein metabolic process|platelet aggregation|activation…
CL20560Contig1	19.6886	33.0168	6.36039	0.192641	-2.37601	0.0409802	0.848713	Down
CL20561Contig1	11.364	20.9107	1.81726	0.0869057	-3.52441	0.0283306	0.715742	Down
CL20585Contig1	11.8183	20.9107	2.72588	0.130359	-2.93944	0.0498951	0.930469	Down
CL20594Contig1	16.0286	27.514	4.54314	0.165121	-2.59841	0.0419819	0.854721	Down
CL20619Contig1	8.70852	16.5084	0.908628	0.0550403	-4.18337	0.0347419	0.796943	Down	gi|255582806|ref|XP_002532177.1|heat shock protein, putative [Ricinus communis] >gi|223528145|gb|EEF30214.1| heat shock protein, putative [Ricinus communis]	5.90641e-78	sp|Q07078|HSP83_ORYSJ	6e-95	Heat shock protein 81-3 OS=Oryza sativa subsp. japonica GN=HSP81-3 PE=2 SV=2	KOG0019	3e-92	Molecular chaperone (HSP90 family)		GO:0006952;GO:0005829;GO:0005618;GO:0009414;GO:0005739;GO:0006457;GO:0005730;GO:0009651;GO:0010286;GO:0009908;GO:0050821;GO:0005524;GO:0071277;GO:0048366;GO:0051082;GO:0005886;GO:0048046	defense response|cytosol|cell wall|response to water deprivation|mitochondrion|protein folding|nucleolus|response to salt stress|heat acclimation|flower development|protein stabilization|ATP binding|cellular response to calcium ion|leaf development|unfolded protein binding|plasma membrane|apoplast
CL20649Contig1	340.14	498.554	181.726	0.364505	-1.45599	0.0235533	0.654849	Down	gi|514704368|ref|XP_005009314.1|PREDICTED: LOW QUALITY PROTEIN: A disintegrin and metalloproteinase with thrombospondin motifs 7-like, partial [Anas platyrhynchos]	0	sp|Q9UKP4|ATS7_HUMAN	0	A disintegrin and metalloproteinase with thrombospondin motifs 7 OS=Homo sapiens GN=ADAMTS7 PE=1 SV=2	KOG3538	0	Disintegrin metalloproteinases with thrombospondin repeats		GO:0004222;GO:0009986;GO:0005578;GO:0006508;GO:0008270	metalloendopeptidase activity|cell surface|proteinaceous extracellular matrix|proteolysis|zinc ion binding
CL20673Contig1	1022.43	1576	468.852	0.297494	-1.74907	0.00139899	0.119593	Down	gi|514765422|ref|XP_005024212.1|PREDICTED: SHC SH2 domain-binding protein 1 [Anas platyrhynchos]	0	sp|Q8NEM2|SHCBP_HUMAN	0	SHC SH2 domain-binding protein 1 OS=Homo sapiens GN=SHCBP1 PE=1 SV=3					GO:0042169;GO:0008543;GO:2000177	SH2 domain binding|fibroblast growth factor receptor signaling pathway|regulation of neural precursor cell proliferation
CL2067Contig1	108.879	201.403	16.3553	0.081207	-3.62225	2.4432e-05	0.00563763	Down	gi|514708403|ref|XP_005010886.1|PREDICTED: prokineticin receptor 2-like isoform X1 [Anas platyrhynchos] >gi|514708407|ref|XP_005010887.1| PREDICTED: prokineticin receptor 2-like isoform X2 [Anas platyrhynchos]	0	sp|Q8SPN2|PKR1_BOVIN	0	Prokineticin receptor 1 OS=Bos taurus GN=PROKR1 PE=2 SV=1	KOG3656	0	FOG: 7 transmembrane receptor		GO:0016021;GO:0007186;GO:0004983	integral component of membrane|G-protein coupled receptor signaling pathway|neuropeptide Y receptor activity
CL20688Contig1	11.0056	22.0112	0	0	#NAME?	0.00287653	0.190403	Down
CL20692Contig1	17.1291	29.7151	4.54314	0.15289	-2.70944	0.0306033	0.751436	Down
CL2075Contig1	46.6013	75.9387	17.2639	0.22734	-2.13707	0.0183929	0.587629	Down
CL2079Contig1	92.147	139.771	44.5228	0.31854	-1.65045	0.0385576	0.827801	Down
CL20803Contig1	99.9214	150.777	49.0659	0.325421	-1.61962	0.0395841	0.838822	Down
CL20816Contig1	12.0102	23.1118	0.908628	0.0393145	-4.6688	0.00811666	0.375972	Down
CL2087Contig1	350.09	508.459	191.72	0.377062	-1.40713	0.0276455	0.71455	Down	gi|514771070|ref|XP_005025541.1|PREDICTED: A-kinase anchor protein SPHKAP [Anas platyrhynchos]	0	sp|Q2M3C7|SPKAP_HUMAN	0	A-kinase anchor protein SPHKAP OS=Homo sapiens GN=SPHKAP PE=1 SV=1					GO:0005739;GO:0030018;GO:0051018	mitochondrion|Z disc|protein kinase A binding
CL20910Contig1	3318.84	4523.31	2114.38	0.467441	-1.09715	0.02345	0.65306	Down	gi|483522128|gb|EOB06964.1|DNA replication licensing factor mcm2, partial [Anas platyrhynchos]	0	sp|P97310|MCM2_MOUSE	0	DNA replication licensing factor MCM2 OS=Mus musculus GN=Mcm2 PE=1 SV=3	KOG0477	0	DNA replication licensing factor, MCM2 component	ko04110, Cell cycle;ko04111, Cell cycle - yeast;ko04113, Meiosis - yeast;ko03030, DNA replication;	GO:0003678;GO:0042393;GO:0071353;GO:0005664;GO:0042555;GO:0005524;GO:0003688;GO:0000785;GO:0006270;GO:0006334;GO:0006268	DNA helicase activity|histone binding|cellular response to interleukin-4|nuclear origin of replication recognition complex|MCM complex|ATP binding|DNA replication origin binding|chromatin|DNA replication initiation|nucleosome assembly|DNA unwinding involved in DNA replication
CL2106Contig1	82.9392	133.168	32.7106	0.245634	-2.02542	0.0138313	0.496422	Down	gi|514725914|ref|XP_005015042.1|PREDICTED: putative beta-lactamase-like 1-like [Anas platyrhynchos]	0	sp|A8MY62|BLML_HUMAN	0	Putative beta-lactamase-like 1 OS=Homo sapiens GN=LACTBL1 PE=2 SV=2
CL21075Contig1	29.7601	49.5252	9.9949	0.201814	-2.3089	0.0224353	0.644538	Down
CL21123Contig1	23.8285	44.0224	3.63451	0.0825604	-3.59841	0.00248928	0.175053	Down
CL21125Contig1	3311.61	4747.82	1875.41	0.395004	-1.34006	0.00591404	0.315164	Down	gi|527246484|ref|XP_005141576.1|PREDICTED: E3 ubiquitin-protein ligase UHRF1 [Melopsittacus undulatus]	0	sp|Q96T88|UHRF1_HUMAN	0	E3 ubiquitin-protein ligase UHRF1 OS=Homo sapiens GN=UHRF1 PE=1 SV=1	KOG4443	1e-09	Putative transcription factor HALR/MLL3, involved in embryonic development		GO:0016363;GO:0044729;GO:0035064;GO:0010216;GO:0008270;GO:0000790;GO:0010390;GO:0042802;GO:0031493;GO:0000122;GO:0004842;GO:0000792;GO:0005657	nuclear matrix|hemi-methylated DNA-binding|methylated histone binding|maintenance of DNA methylation|zinc ion binding|nuclear chromatin|histone monoubiquitination|identical protein binding|nucleosomal histone binding|negative regulation of transcription from RNA polymerase II promoter|ubiquitin-protein transferase activity|heterochromatin|replication fork
CL21136Contig1	37.3425	58.3297	16.3553	0.280394	-1.83447	0.0496529	0.929396	Down
CL21140Contig1	2741.44	3825.55	1657.34	0.433228	-1.2068	0.0137353	0.496422	Down	gi|514774363|ref|XP_005026335.1|PREDICTED: targeting protein for Xklp2-like isoform X3 [Anas platyrhynchos]	0	sp|Q9ULW0|TPX2_HUMAN	0	Targeting protein for Xklp2 OS=Homo sapiens GN=TPX2 PE=1 SV=2					GO:0007067;GO:0032147;GO:0005874;GO:0000922;GO:0019901;GO:0060236;GO:0005634	mitotic nuclear division|activation of protein kinase activity|microtubule|spindle pole|protein kinase binding|regulation of mitotic spindle organization|nucleus
CL21269Contig1	9.35477	18.7095	0	0	#NAME?	0.00653703	0.329146	Down	gi|514767036|ref|XP_005024594.1|PREDICTED: vesicular glutamate transporter 3 [Anas platyrhynchos] >gi|483506865|gb|EOA97706.1| Vesicular glutamate transporter 3, partial [Anas platyrhynchos]	2.29167e-85	sp|Q7TSF2|VGLU3_RAT	9e-103	Vesicular glutamate transporter 3 OS=Rattus norvegicus GN=Slc17a8 PE=1 SV=2	KOG2532	1e-102	Permease of the major facilitator superfamily		GO:0055085;GO:0016021	transmembrane transport|integral component of membrane
CL21297Contig1	19.4262	35.2179	3.63451	0.103201	-3.27648	0.00856033	0.38733	Down
CL2136Contig1	207.815	335.671	79.9592	0.238207	-2.06971	0.00381344	0.23177	Down	gi|514740774|ref|XP_005018341.1|PREDICTED: polycystic kidney disease protein 1-like 2 [Anas platyrhynchos]	0	sp|Q7Z442|PK1L2_HUMAN	0	Polycystic kidney disease protein 1-like 2 OS=Homo sapiens GN=PKD1L2 PE=1 SV=4	KOG3599	0	Ca2+-modulated nonselective cation channel polycystin		GO:0016021;GO:0007218;GO:0030246;GO:0005509	integral component of membrane|neuropeptide signaling pathway|carbohydrate binding|calcium ion binding
CL21382Contig1	22.0817	39.6202	4.54314	0.114667	-3.12447	0.0078001	0.366707	Down
CL21459Contig1	1070.13	1654.14	486.116	0.293878	-1.76671	0.00117655	0.106548	Down	gi|513215421|ref|XP_004946532.1|PREDICTED: collagen alpha-1(XXVI) chain isoform X9 [Gallus gallus]	4.08882e-115	sp|Q91VF6|COQA1_MOUSE	2e-87	Collagen alpha-1(XXVI) chain OS=Mus musculus GN=Col26a1 PE=1 SV=1
CL21484Contig1	12.3686	22.0112	2.72588	0.123841	-3.01344	0.0411285	0.848713	Down
CL21568Contig1	19.4262	35.2179	3.63451	0.103201	-3.27648	0.00856033	0.38733	Down
CL21590Contig1	11.9142	22.0112	1.81726	0.0825604	-3.59841	0.0229033	0.648598	Down
CL21591Contig1	23.9949	40.7208	7.26902	0.178509	-2.48593	0.0227534	0.648598	Down
CL21616Contig1	58.88	117.76	0	0	#NAME?	1.01462e-08	8.10909e-06	Down
CL21711Contig1	13.757	27.514	0	0	#NAME?	0.00081577	0.0818224	Down	gi|225459564|ref|XP_002285857.1|PREDICTED: photosystem II 22 kDa protein, chloroplastic [Vitis vinifera] >gi|302141814|emb|CBI19017.3| unnamed protein product [Vitis vinifera]	2.80522e-30	sp|Q9SMB4|PSBS_TOBAC	4e-30	Photosystem II 22 kDa protein, chloroplastic OS=Nicotiana tabacum GN=PSBS PE=2 SV=1				ko00195, Photosynthesis;	GO:0051738;GO:0010103;GO:0009517;GO:0043085;GO:0019252;GO:0010207;GO:0000023;GO:0080167;GO:0016168;GO:0016021;GO:0010196;GO:0019344;GO:0009523;GO:0006364;GO:0010027	xanthophyll binding|stomatal complex morphogenesis|PSII associated light-harvesting complex II|positive regulation of catalytic activity|starch biosynthetic process|photosystem II assembly|maltose metabolic process|response to karrikin|chlorophyll binding|integral component of membrane|nonphotochemical quenching|cysteine biosynthetic process|photosystem II|rRNA processing|thylakoid membrane organ…
CL2171Contig1	545.166	781.398	308.933	0.39536	-1.33876	0.0239456	0.661565	Down
CL21789Contig1	479.202	723.069	235.335	0.325466	-1.61942	0.00790448	0.369623	Down
CL21845Contig1	16.6748	29.7151	3.63451	0.122312	-3.03137	0.0194608	0.604212	Down	gi|514769694|ref|XP_005025219.1|PREDICTED: aprataxin and PNK-like factor isoform X2 [Anas platyrhynchos]	1.75693e-08
CL21863Contig1	29.4977	51.7264	7.26902	0.140528	-2.83107	0.00685692	0.338815	Down
CL21905Contig1	150.707	227.816	73.5988	0.323062	-1.63011	0.0278243	0.71455	Down	gi|514792512|ref|XP_005030473.1|PREDICTED: mitochondrial uncoupling protein 4 isoform X1 [Anas platyrhynchos]	3.58141e-107	sp|O95847|UCP4_HUMAN	2e-110	Mitochondrial uncoupling protein 4 OS=Homo sapiens GN=SLC25A27 PE=1 SV=1	KOG0753	5e-111	Mitochondrial fatty acid anion carrier protein/Uncoupling protein		GO:0016021;GO:0006839;GO:0031966	integral component of membrane|mitochondrial transport|mitochondrial membrane
CL2193Contig1	21.269	40.7208	1.81726	0.0446272	-4.48593	0.000891252	0.0870059	Down	gi|483509521|gb|EOA99158.1|hypothetical protein Anapl_12383 [Anas platyrhynchos]	4.27927e-10
CL21946Contig1	10.8137	19.8101	1.81726	0.0917338	-3.4464	0.0351292	0.798886	Down
CL21990Contig1	10585.5	16203.6	4967.47	0.306566	-1.70573	0.000626569	0.0691796	Down	gi|514703948|ref|XP_005009111.1|PREDICTED: collagen alpha-2(IV) chain [Anas platyrhynchos]	0	sp|P08572|CO4A2_HUMAN	0	Collagen alpha-2(IV) chain OS=Homo sapiens GN=COL4A2 PE=1 SV=4	KOG3544	0	Collagens (type IV and type XIII), and related proteins	ko04510, Focal adhesion;ko04151, PI3K-Akt signaling pathway;ko04512, ECM-receptor interaction;ko05200, Pathways in cancer;ko05222, Small cell lung cancer;ko05146, Amoebiasis;ko04974, Protein digestion and absorption;	GO:0016525;GO:0071560;GO:0006351;GO:0005201;GO:0005587	negative regulation of angiogenesis|cellular response to transforming growth factor beta stimulus|transcription, DNA-templated|extracellular matrix structural constituent|collagen type IV trimer
CL22004Contig1	14.5697	26.4135	2.72588	0.103201	-3.27648	0.0193476	0.604212	Down
CL22030Contig1	10.2634	18.7095	1.81726	0.0971299	-3.36394	0.0436618	0.870587	Down
CL22122Contig1	21.8897	37.4191	6.36039	0.169977	-2.55659	0.0238173	0.659276	Down
CL22172Contig1	19.1383	31.9163	6.36039	0.199284	-2.3271	0.0470303	0.903136	Down
CL22212Contig1	13.0148	24.2123	1.81726	0.0750549	-3.73591	0.0150871	0.51788	Down
CL22269Contig1	15.4079	30.8157	0	0	#NAME?	0.000405485	0.0495548	Down
CL22316Contig1	1502.51	2038.24	966.78	0.474321	-1.07606	0.0362323	0.804503	Down	gi|514719032|ref|XP_005013407.1|PREDICTED: frataxin, mitochondrial, partial [Anas platyrhynchos]	3.2819e-40	sp|Q05B87|FRDA_BOVIN	5e-39	Frataxin, mitochondrial OS=Bos taurus GN=FXN PE=2 SV=1	KOG3413	2e-38	Mitochondrial matrix protein frataxin, involved in Fe/S protein biosynthesis		GO:0030307;GO:0010722;GO:0019230;GO:0018283;GO:0046621;GO:0043066;GO:0006879;GO:0040015;GO:0006783;GO:0070301;GO:0048554;GO:0010039;GO:0005829;GO:0006119;GO:0007628;GO:0016540;GO:0051537;GO:0008284;GO:0009792;GO:0008199;GO:0051353;GO:0034986;GO:0007005;GO:0009060;GO:0006811;GO:0051349;GO:0051347;GO:0008198;GO:0090201;GO:0004322;GO:0005739	positive regulation of cell growth|regulation of ferrochelatase activity|proprioception|iron incorporation into metallo-sulfur cluster|negative regulation of organ growth|negative regulation of apoptotic process|cellular iron ion homeostasis|negative regulation of multicellular organism growth|heme biosynthetic process|cellular response to hydrogen peroxide|positive regulation of metalloenzyme ac…
CL22435Contig1	1727.89	2340.89	1114.89	0.476265	-1.07016	0.0345848	0.794788	Down	gi|326915211|ref|XP_003203913.1|PREDICTED: serine/threonine-protein kinase Nek2-like [Meleagris gallopavo]	2.62722e-169	sp|P51955|NEK2_HUMAN	1e-165	Serine/threonine-protein kinase Nek2 OS=Homo sapiens GN=NEK2 PE=1 SV=1	KOG1826	3e-166	Ras GTPase activating protein RasGAP/neurofibromin		GO:0001824;GO:0043392;GO:0046777;GO:0000776;GO:0004674;GO:0005813;GO:0019903;GO:0000070;GO:0030496;GO:0090307;GO:0000794;GO:0051988;GO:0051299;GO:0005524;GO:0000922	blastocyst development|negative regulation of DNA binding|protein autophosphorylation|kinetochore|protein serine/threonine kinase activity|centrosome|protein phosphatase binding|mitotic sister chromatid segregation|midbody|spindle assembly involved in mitosis|condensed nuclear chromosome|regulation of attachment of spindle microtubules to kinetochore|centrosome separation|ATP binding|spindle pole
CL22504Contig1	14.8576	29.7151	0	0	#NAME?	0.000509878	0.0588827	Down
CL22521Contig1	6.05309	12.1062	0	0	#NAME?	0.0405318	0.846811	Down
CL22581Contig1	18.2297	31.9163	4.54314	0.142346	-2.81253	0.0223985	0.644538	Down
CL22641Contig1	13.9234	24.2123	3.63451	0.15011	-2.73591	0.0456961	0.886646	Down
CL22674Contig1	12.6565	25.3129	0	0	#NAME?	0.00132996	0.11506	Down	gi|45383309|ref|NP_989757.1|collagen alpha-1(II) chain precursor [Gallus gallus] >gi|15546070|gb|AAK98621.1| alpha 1 type IIA collagen precursor [Gallus gallus]	6.7006e-34	sp|P02459|CO2A1_BOVIN	2e-39	Collagen alpha-1(II) chain OS=Bos taurus GN=COL2A1 PE=1 SV=4	KOG3544	1e-37	Collagens (type IV and type XIII), and related proteins		GO:0003007;GO:0060351;GO:0060021;GO:0007605;GO:0060174;GO:0002062;GO:0005604;GO:0006029;GO:0007417;GO:0043066;GO:0071599;GO:0001502;GO:0010468;GO:0005201;GO:0005615;GO:0030903;GO:0048407;GO:0005737;GO:0046872;GO:0071773;GO:0042472;GO:0007601;GO:0042802;GO:0030199;GO:0060272;GO:0005585;GO:0001958;GO:0001894	heart morphogenesis|cartilage development involved in endochondral bone morphogenesis|palate development|sensory perception of sound|limb bud formation|chondrocyte differentiation|basement membrane|proteoglycan metabolic process|central nervous system development|negative regulation of apoptotic process|otic vesicle development|cartilage condensation|regulation of gene expression|extracellular ma…
CL22676Contig1	14.5697	26.4135	2.72588	0.103201	-3.27648	0.0193476	0.604212	Down	gi|483509521|gb|EOA99158.1|hypothetical protein Anapl_12383 [Anas platyrhynchos]	1.20986e-13
CL2268Contig1	74.2879	148.576	0	0	#NAME?	1.1775e-09	1.18577e-06	Down
CL22696Contig1	38.635	62.732	14.538	0.231749	-2.10937	0.0246183	0.668223	Down
CL22779Contig1	12.6565	25.3129	0	0	#NAME?	0.00132996	0.11506	Down
CL22859Contig1	25.9336	47.3241	4.54314	0.0960005	-3.38081	0.00290311	0.19116	Down
CL22891Contig1	1064.2	1492.36	636.039	0.426197	-1.23041	0.0219583	0.642775	Down	gi|514786273|ref|XP_005028985.1|PREDICTED: hyaluronan mediated motility receptor isoform X1 [Anas platyrhynchos]	3.382e-147	sp|O75330|HMMR_HUMAN	7e-68	Hyaluronan mediated motility receptor OS=Homo sapiens GN=HMMR PE=1 SV=2	KOG0963	2e-06	Transcription factor/CCAAT displacement protein CDP1	ko04512, ECM-receptor interaction;	GO:0005540	hyaluronic acid binding
CL22893Contig1	20.2389	34.1174	6.36039	0.186427	-2.42332	0.0357356	0.800054	Down
CL2293Contig1	77.4109	116.659	38.1624	0.327126	-1.61208	0.0493024	0.925242	Down
CL23031Contig1	6.60337	13.2067	0	0	#NAME?	0.0293264	0.729553	Down
CL23066Contig1	12.3686	22.0112	2.72588	0.123841	-3.01344	0.0411285	0.848713	Down	gi|363741147|ref|XP_003642454.1|PREDICTED: coronin-6 isoformX1 [Gallus gallus]	4.75926e-51	sp|Q6QEF8|CORO6_HUMAN	8e-48	Coronin-6 OS=Homo sapiens GN=CORO6 PE=2 SV=2	KOG0303	2e-51	Actin-binding protein Coronin, contains WD40 repeats
CL23098Contig1	8.15824	15.4079	0.908628	0.0589717	-4.08383	0.0448605	0.883792	Down	gi|326926018|ref|XP_003209203.1|PREDICTED: acetylcholine receptor subunit gamma-like [Meleagris gallopavo]	1.09896e-23	sp|P02713|ACHG_CHICK	1e-29	Acetylcholine receptor subunit gamma OS=Gallus gallus GN=CHRNG PE=3 SV=1	KOG3645	8e-24	Acetylcholine receptor		GO:0004889;GO:0045211;GO:0030054;GO:0042391;GO:0005892;GO:0006811	acetylcholine-activated cation-selective channel activity|postsynaptic membrane|cell junction|regulation of membrane potential|acetylcholine-gated channel complex|ion transport
CL23104Contig1	12.1062	24.2123	0	0	#NAME?	0.00171094	0.136744	Down	gi|558196518|ref|XP_006130512.1|PREDICTED: POU domain, class 3, transcription factor 4 [Pelodiscus sinensis]	9.08213e-52	sp|A1L0Z1|PO3F4_XENTR	1e-65	POU domain, class 3, transcription factor 4 OS=Xenopus tropicalis GN=pou3f4 PE=2 SV=1	KOG3802	3e-66	Transcription factor OCT-1, contains POU and HOX domains		GO:0003690;GO:0021879;GO:2001054;GO:0003680;GO:0006355;GO:0003700;GO:0007605;GO:0090103;GO:0005634;GO:0006366	double-stranded DNA binding|forebrain neuron differentiation|negative regulation of mesenchymal cell apoptotic process|AT DNA binding|regulation of transcription, DNA-templated|sequence-specific DNA binding transcription factor activity|sensory perception of sound|cochlea morphogenesis|nucleus|transcription from RNA polymerase II promoter
CL23109Contig1	2848.64	3997.24	1700.04	0.425304	-1.23343	0.011656	0.4487	Down	gi|483509508|gb|EOA99148.1|Inner centromere protein, partial [Anas platyrhynchos]	0	sp|P53352|INCE_CHICK	2e-166	Inner centromere protein OS=Gallus gallus GN=INCENP PE=2 SV=1	KOG4456	3e-54	Inner centromere protein (INCENP), C-terminal domain		GO:0005737;GO:0007059;GO:0007067;GO:0000800;GO:0000776;GO:0005515;GO:0000910;GO:0010369;GO:0000801;GO:0030496;GO:0005819;GO:0005721;GO:0005874	cytoplasm|chromosome segregation|mitotic nuclear division|lateral element|kinetochore|protein binding|cytokinesis|chromocenter|central element|midbody|spindle|centromeric heterochromatin|microtubule
CL2311Contig1	185.503	324.665	46.34	0.142732	-2.80862	0.000192841	0.0289844	Down	gi|514781505|ref|XP_005027867.1|PREDICTED: peptidase inhibitor 15 [Anas platyrhynchos] >gi|483502265|gb|EOA95508.1| Peptidase inhibitor 15, partial [Anas platyrhynchos]	1.75437e-156	sp|Q98ST6|PI15_CHICK	0	Peptidase inhibitor 15 OS=Gallus gallus GN=PI15 PE=2 SV=1	KOG3017	1e-175	Defense-related protein containing SCP domain		GO:0030414;GO:0005576	peptidase inhibitor activity|extracellular region
CL23132Contig1	60.8892	119.961	1.81726	0.0151487	-6.04466	2.73428e-07	0.000134974	Down
CL23160Contig1	15.12	27.514	2.72588	0.0990725	-3.33537	0.0161003	0.537932	Down
CL23171Contig1	28.781	53.9275	3.63451	0.0673963	-3.89119	0.000702373	0.0747802	Down
CL23198Contig1	42.7749	73.7376	11.8122	0.160192	-2.64213	0.00523051	0.286886	Down
CL23222Contig1	11.364	20.9107	1.81726	0.0869057	-3.52441	0.0283306	0.715742	Down
CL2322Contig1	135.549	231.118	39.9796	0.172984	-2.53129	0.00117462	0.106548	Down
CL2322Contig2	237.493	347.777	127.208	0.365774	-1.45098	0.0341897	0.788948	Down
CL23257Contig1	11.0056	22.0112	0	0	#NAME?	0.00287653	0.190403	Down
CL2330Contig1	36.5299	59.4303	13.6294	0.229334	-2.12447	0.0254741	0.688483	Down	gi|514788322|ref|XP_005029484.1|PREDICTED: monocarboxylate transporter 12 isoform X1 [Anas platyrhynchos]	1.64688e-93	sp|Q8BGC3|MOT12_MOUSE	5e-79	Monocarboxylate transporter 12 OS=Mus musculus GN=Slc16a12 PE=2 SV=1	KOG2504	3e-15	Monocarboxylate transporter		GO:0055085;GO:0016021	transmembrane transport|integral component of membrane
CL23330Contig1	16.0286	27.514	4.54314	0.165121	-2.59841	0.0419819	0.854721	Down
CL23339Contig1	16.1245	28.6146	3.63451	0.127016	-2.97692	0.0230283	0.64958	Down
CL23429Contig1	19.4262	35.2179	3.63451	0.103201	-3.27648	0.00856033	0.38733	Down
CL23438Contig1	1941.41	2731.59	1151.23	0.421451	-1.24656	0.0131743	0.483836	Down	gi|514727616|ref|XP_005015441.1|PREDICTED: hydroxysteroid dehydrogenase-like protein 2-like [Anas platyrhynchos]	0	sp|A4FUZ6|HSDL2_BOVIN	0	Hydroxysteroid dehydrogenase-like protein 2 OS=Bos taurus GN=HSDL2 PE=2 SV=1	KOG0725	2e-95	Reductases with broad range of substrate specificities
CL23465Contig1	2180.44	2919.79	1441.08	0.493558	-1.01871	0.039835	0.841331	Down	gi|543723824|ref|XP_005503070.1|PREDICTED: kinesin-like protein KIF20B [Columba livia]	0	sp|Q96Q89|KI20B_HUMAN	0	Kinesin-like protein KIF20B OS=Homo sapiens GN=KIF20B PE=1 SV=3	KOG0247	0	Kinesin-like protein		GO:0050699;GO:0005654;GO:0005730;GO:0005874;GO:0003777;GO:0008017;GO:0005813;GO:0016887;GO:0006200;GO:0007018;GO:0005524	WW domain binding|nucleoplasm|nucleolus|microtubule|microtubule motor activity|microtubule binding|centrosome|ATPase activity|ATP catabolic process|microtubule-based movement|ATP binding
CL23469Contig1	12.3686	22.0112	2.72588	0.123841	-3.01344	0.0411285	0.848713	Down
CL23506Contig1	14.4737	25.3129	3.63451	0.143583	-2.80004	0.0384292	0.827488	Down	gi|529428913|ref|XP_005234276.1|PREDICTED: protein FAM160B2 [Falco peregrinus]	2.0058e-41
CL23523Contig1	1709.73	2304.57	1114.89	0.483771	-1.0476	0.0386955	0.828774	Down	gi|513183860|ref|XP_420670.4|PREDICTED: centromere-associated protein E [Gallus gallus]	0	sp|Q02224|CENPE_HUMAN	0	Centromere-associated protein E OS=Homo sapiens GN=CENPE PE=1 SV=2	KOG0242	0	Kinesin-like protein		GO:0003777;GO:0008017;GO:0043515;GO:0005874;GO:0000940;GO:0005524;GO:0007018;GO:0005871;GO:0000778;GO:0045860;GO:0005737	microtubule motor activity|microtubule binding|kinetochore binding|microtubule|condensed chromosome outer kinetochore|ATP binding|microtubule-based movement|kinesin complex|condensed nuclear chromosome kinetochore|positive regulation of protein kinase activity|cytoplasm
CL23623Contig1	14.0194	25.3129	2.72588	0.107687	-3.21508	0.0232928	0.652289	Down
CL23626Contig1	49.6406	84.7432	14.538	0.171554	-2.54326	0.00547441	0.296149	Down
CL23676Contig1	85.2935	170.587	0	0	#NAME?	2.7813e-10	3.25677e-07	Down	gi|162448765|ref|YP_001611132.1|hypothetical protein sce0495 [Sorangium cellulosum So ce56] >gi|501190112|ref|WP_012233130.1| hypothetical protein [Sorangium cellulosum] >gi|161159347|emb|CAN90652.1| hypothetical protein predicted by Glimmer/Critica [Sorangium cellulosum So ce56]	1.79763e-07
CL23833Contig1	20.2389	34.1174	6.36039	0.186427	-2.42332	0.0357356	0.800054	Down
CL23875Contig1	35.7876	56.1286	15.4467	0.275201	-1.86144	0.0487614	0.921153	Down
CL23981Contig1	16.1245	28.6146	3.63451	0.127016	-2.97692	0.0230283	0.64958	Down
CL2402Contig1	38.4941	71.5365	5.45177	0.0762096	-3.71388	0.000380125	0.0472584	Down
CL24048Contig1	11.364	20.9107	1.81726	0.0869057	-3.52441	0.0283306	0.715742	Down
CL2406Contig1	30.6687	49.5252	11.8122	0.238508	-2.06789	0.0368973	0.806694	Down	gi|514772875|ref|XP_005025971.1|PREDICTED: LOW QUALITY PROTEIN: periplakin, partial [Anas platyrhynchos]	0	sp|Q9R269|PEPL_MOUSE	0	Periplakin OS=Mus musculus GN=Ppl PE=1 SV=1	KOG0516	0	Dystonin, GAS (Growth-arrest-specific protein), and related proteins
CL24099Contig1	16.0286	27.514	4.54314	0.165121	-2.59841	0.0419819	0.854721	Down
CL24147Contig1	8.80449	17.609	0	0	#NAME?	0.0086999	0.388686	Down
CL24299Contig1	25.2874	45.123	5.45177	0.12082	-3.04907	0.00624761	0.324208	Down
CL24330Contig1	711.154	1012.52	409.791	0.404725	-1.30498	0.0218084	0.641504	Down	gi|514755967|ref|XP_005021963.1|PREDICTED: GPI inositol-deacylase [Anas platyrhynchos]	0	sp|Q3UUQ7|PGAP1_MOUSE	0	GPI inositol-deacylase OS=Mus musculus GN=Pgap1 PE=1 SV=3	KOG3724	0	Negative regulator of COPII vesicle formation	ko00563, Glycosylphosphatidylinositol(GPI)-anchor biosynthesis;	GO:0006505;GO:0007605;GO:0016788;GO:0021871;GO:0009948;GO:0060322;GO:0006886;GO:0009880	GPI anchor metabolic process|sensory perception of sound|hydrolase activity, acting on ester bonds|forebrain regionalization|anterior/posterior axis specification|head development|intracellular protein transport|embryonic pattern specification
CL24377Contig1	11.0056	22.0112	0	0	#NAME?	0.00287653	0.190403	Down
CL24400Contig1	10.8137	19.8101	1.81726	0.0917338	-3.4464	0.0351292	0.798886	Down
CL24416Contig1	15.5743	27.514	3.63451	0.132097	-2.92033	0.0272834	0.713473	Down
CL24417Contig1	6.05309	12.1062	0	0	#NAME?	0.0405318	0.846811	Down
CL24480Contig1	12.4645	23.1118	1.81726	0.078629	-3.6688	0.0185641	0.589728	Down
CL24482Contig1	2381.56	3418.34	1344.77	0.393398	-1.34594	0.0066397	0.331006	Down	gi|45383720|ref|NP_989527.1|ferrochelatase, mitochondrial precursor [Gallus gallus] >gi|3913810|sp|O42479.1|HEMH_CHICK RecName: Full=Ferrochelatase, mitochondrial; AltName: Full=Heme synthase; AltName: Full=Protoheme ferro-lyase; Flags: Precursor >gi|2323275|gb|AAB66503.1| ferrochelatase [Gallus gallus]	0	sp|O42479|HEMH_CHICK	0	Ferrochelatase, mitochondrial OS=Gallus gallus GN=FECH PE=1 SV=1	KOG1321	0	Protoheme ferro-lyase (ferrochelatase)	ko00860, Porphyrin and chlorophyll metabolism;	GO:0004325;GO:0046501;GO:0005759;GO:0006783;GO:0020037;GO:0008203;GO:0005743;GO:0009589;GO:0034379;GO:0051537;GO:0055072;GO:0030350;GO:0005506;GO:0030218;GO:0010999;GO:0046984	ferrochelatase activity|protoporphyrinogen IX metabolic process|mitochondrial matrix|heme biosynthetic process|heme binding|cholesterol metabolic process|mitochondrial inner membrane|detection of UV|very-low-density lipoprotein particle assembly|2 iron, 2 sulfur cluster binding|iron ion homeostasis|iron-responsive element binding|iron ion binding|erythrocyte differentiation|regulation of eIF2 alp…
CL24487Contig1	13.5651	25.3129	1.81726	0.0717917	-3.80004	0.0122944	0.46335	Down
CL24541Contig1	8.80449	17.609	0	0	#NAME?	0.0086999	0.388686	Down
CL24568Contig1	570.818	846.331	295.304	0.348922	-1.51902	0.0102209	0.422126	Down
CL24589Contig1	15.024	26.4135	3.63451	0.137601	-2.86144	0.0323623	0.765805	Down
CL24683Contig1	51.9826	80.3409	23.6243	0.294051	-1.76586	0.0439419	0.874513	Down	gi|557280938|ref|XP_006023451.1|PREDICTED: low-density lipoprotein receptor [Alligator sinensis]	4.67189e-11	sp|P01131|LDLR_BOVIN	4e-14	Low-density lipoprotein receptor (Fragment) OS=Bos taurus GN=LDLR PE=2 SV=1	KOG1215	2e-13	Low-density lipoprotein receptors containing Ca2+-binding EGF-like domains		GO:0016021;GO:0005509	integral component of membrane|calcium ion binding
CL24684Contig1	612.595	861.739	363.451	0.421765	-1.24549	0.032067	0.764855	Down	gi|513210936|ref|XP_004934460.1|PREDICTED: citron Rho-interacting kinase isoform X13 [Gallus gallus]	0	sp|P49025|CTRO_MOUSE	0	Citron Rho-interacting kinase OS=Mus musculus GN=Cit PE=1 SV=3	KOG0976	0	Rho/Rac1-interacting serine/threonine kinase Citron		GO:0016358;GO:0005773;GO:0015629;GO:0007283;GO:0005083;GO:0005543;GO:0050774;GO:0046872;GO:0001726;GO:0006468;GO:0004674;GO:0000070;GO:0005524;GO:0007091;GO:0035556;GO:0000910	dendrite development|vacuole|actin cytoskeleton|spermatogenesis|small GTPase regulator activity|phospholipid binding|negative regulation of dendrite morphogenesis|metal ion binding|ruffle|protein phosphorylation|protein serine/threonine kinase activity|mitotic sister chromatid segregation|ATP binding|metaphase/anaphase transition of mitotic cell cycle|intracellular signal transduction|cytokinesis
CL24709Contig1	15.8622	30.8157	0.908628	0.0294859	-5.08383	0.00175612	0.138376	Down	gi|514715669|ref|XP_005012607.1|PREDICTED: LOW QUALITY PROTEIN: transcription factor SOX-11-like, partial [Anas platyrhynchos]	2.97767e-42	sp|P48435|SOX11_CHICK	3e-54	Transcription factor SOX-11 OS=Gallus gallus GN=SOX11 PE=2 SV=1	KOG0527	9e-53	HMG-box transcription factor		GO:0048704;GO:0000979;GO:0060174;GO:0090263;GO:0072395;GO:0001841;GO:0045669;GO:0021510;GO:2000648;GO:0021782;GO:0014009;GO:0050769;GO:0030513;GO:0046887;GO:0035914;GO:0006351;GO:0003357;GO:0001105;GO:0048557;GO:0060563;GO:0061029;GO:0061303;GO:0048485;GO:0001077;GO:0002089;GO:0003151;GO:0045944;GO:0005737;GO:0061386;GO:0045666;GO:2001111;GO:0000122;GO:0001158;GO:0061053;GO:0060022;GO:0035332;GO:…	embryonic skeletal system morphogenesis|RNA polymerase II core promoter sequence-specific DNA binding|limb bud formation|positive regulation of canonical Wnt signaling pathway|signal transduction involved in cell cycle checkpoint|neural tube formation|positive regulation of osteoblast differentiation|spinal cord development|positive regulation of stem cell proliferation|glial cell development|gli…
CL24712Contig1	17.6794	30.8157	4.54314	0.147429	-2.7619	0.0261675	0.698669	Down
CL24756Contig1	21.9857	38.5196	5.45177	0.141532	-2.8208	0.014148	0.496422	Down
CL24781Contig1	22.9198	44.0224	1.81726	0.0412802	-4.59841	0.000536779	0.0608724	Down
CL24794Contig1	21.173	39.6202	2.72588	0.0688003	-3.86144	0.00238349	0.168792	Down
CL24839Contig1	17.5835	29.7151	5.45177	0.183468	-2.4464	0.044785	0.883792	Down
CL24842Contig1	13.9234	24.2123	3.63451	0.15011	-2.73591	0.0456961	0.886646	Down	gi|299481084|gb|ADJ19117.1|membrane-bound sialidase [Gallus gallus]	8.65901e-35	sp|O97859|NEUR3_BOVIN	6e-18	Sialidase-3 OS=Bos taurus GN=NEU3 PE=1 SV=1				ko00511, Other glycan degradation;ko00600, Sphingolipid metabolism;	GO:0004308	exo-alpha-sialidase activity
CL24851Contig1	12.4645	23.1118	1.81726	0.078629	-3.6688	0.0185641	0.589728	Down
CL24895Contig1	18.2297	31.9163	4.54314	0.142346	-2.81253	0.0223985	0.644538	Down
CL24908Contig1	17.6794	30.8157	4.54314	0.147429	-2.7619	0.0261675	0.698669	Down
CL2492Contig1	101.098	169.486	32.7106	0.192998	-2.37334	0.00335454	0.211925	Down
CL25084Contig1	19.9765	36.3185	3.63451	0.100073	-3.32087	0.00729544	0.353084	Down	gi|530567322|ref|XP_005280186.1|PREDICTED: ubiquitin-like protein 4A [Chrysemys picta bellii]	2.34306e-10	sp|P11441|UBL4A_HUMAN	1e-11	Ubiquitin-like protein 4A OS=Homo sapiens GN=UBL4A PE=1 SV=1	KOG0001	2e-12	Ubiquitin and ubiquitin-like proteins
CL25118Contig1	11.4599	22.0112	0.908628	0.0412802	-4.59841	0.0102468	0.422126	Down
CL25170Contig1	17.609	35.2179	0	0	#NAME?	0.00016776	0.0263143	Down	gi|514706334|ref|XP_005010253.1|PREDICTED: ethanolaminephosphotransferase 1-like [Anas platyrhynchos]	6.79386e-24	sp|Q5NV96|EPT1_PONAB	7e-10	Ethanolaminephosphotransferase 1 OS=Pongo abelii GN=EPT1 PE=2 SV=2	KOG2877	2e-10	sn-1,2-diacylglycerol ethanolamine- and cholinephosphotranferases		GO:0016020;GO:0016780;GO:0008654	membrane|phosphotransferase activity, for other substituted phosphate groups|phospholipid biosynthetic process
CL25179Contig1	20.9107	41.8213	0	0	#NAME?	4.91815e-05	0.0103434	Down
CL25181Contig1	8.25421	16.5084	0	0	#NAME?	0.0116562	0.4487	Down	gi|449281342|gb|EMC88425.1|Eukaryotic translation initiation factor 5A-1 [Columba livia]	8.855e-07
CL25189Contig1	105.783	160.682	50.8831	0.31667	-1.65895	0.033691	0.784995	Down	gi|543368090|ref|XP_005527395.1|PREDICTED: immediate early response gene 5-like protein [Pseudopodoces humilis]	6.91258e-15
CL25192Contig1	17.609	35.2179	0	0	#NAME?	0.00016776	0.0263143	Down
CL25227Contig1	158.596	302.654	14.538	0.0480351	-4.37977	2.50647e-07	0.000126203	Down	gi|514732475|ref|XP_005016608.1|PREDICTED: tryptophan 2,3-dioxygenase isoform X2 [Anas platyrhynchos] >gi|514732479|ref|XP_005016609.1| PREDICTED: tryptophan 2,3-dioxygenase isoform X3 [Anas platyrhynchos]	1.02674e-159	sp|Q5EBG2|T23O_XENTR	6e-168	Tryptophan 2,3-dioxygenase OS=Xenopus tropicalis GN=tdo2 PE=2 SV=1	KOG3906	2e-161	Tryptophan 2,3-dioxygenase	ko00380, Tryptophan metabolism;	GO:0046872;GO:0004833;GO:0020037;GO:0019441;GO:0055114	metal ion binding|tryptophan 2,3-dioxygenase activity|heme binding|tryptophan catabolic process to kynurenine|oxidation-reduction process
CL25273Contig1	101.476	152.978	49.9745	0.326678	-1.61406	0.039764	0.840184	Down
CL25278Contig1	19.2598	38.5196	0	0	#NAME?	8.9564e-05	0.0160485	Down
CL25290Contig1	3425.14	5049.37	1800.9	0.356658	-1.48739	0.00230858	0.164412	Down	gi|465998417|gb|EMP40615.1|LIM and senescent cell antigen-like-containing domain protein 1 [Chelonia mydas]	1.30747e-132	sp|Q99JW4|LIMS1_MOUSE	1e-150	LIM and senescent cell antigen-like-containing domain protein 1 OS=Mus musculus GN=Lims1 PE=1 SV=3	KOG2272	3e-151	Focal adhesion protein PINCH-1, contains LIM domains		GO:0008270	zinc ion binding
CL25293Contig1	25.9336	47.3241	4.54314	0.0960005	-3.38081	0.00290311	0.19116	Down
CL25303Contig1	1915.92	3366.62	465.217	0.138185	-2.85532	7.94706e-08	4.59934e-05	Down	gi|483524816|gb|EOB08656.1|Laminin subunit alpha-2, partial [Anas platyrhynchos]	0	sp|P24043|LAMA2_HUMAN	0	Laminin subunit alpha-2 OS=Homo sapiens GN=LAMA2 PE=1 SV=4	KOG1836	0	Extracellular matrix glycoprotein Laminin subunits alpha and gamma	ko04510, Focal adhesion;ko04151, PI3K-Akt signaling pathway;ko04512, ECM-receptor interaction;ko05200, Pathways in cancer;ko05222, Small cell lung cancer;ko05145, Toxoplasmosis;ko05146, Amoebiasis;
CL25305Contig1	14.5697	26.4135	2.72588	0.103201	-3.27648	0.0193476	0.604212	Down
CL25328Contig1	23.9949	40.7208	7.26902	0.178509	-2.48593	0.0227534	0.648598	Down
CL2542Contig1	50.05	94.6482	5.45177	0.0576003	-4.11778	5.67709e-05	0.0113431	Down
CL25461Contig1	7.15365	14.3073	0	0	#NAME?	0.0213883	0.637987	Down
CL25470Contig1	16.0286	27.514	4.54314	0.165121	-2.59841	0.0419819	0.854721	Down
CL25492Contig1	40.1899	64.9331	15.4467	0.237886	-2.07166	0.0257989	0.694654	Down
CL25516Contig1	31.7243	61.6314	1.81726	0.0294859	-5.08383	4.93023e-05	0.0103434	Down
CL2561Contig1	366.604	562.387	170.822	0.303745	-1.71907	0.0071876	0.349665	Down	gi|513186001|ref|XP_004941379.1|PREDICTED: neuron navigator 2 isoform X8 [Gallus gallus]	0	sp|Q8IVL1|NAV2_HUMAN	0	Neuron navigator 2 OS=Homo sapiens GN=NAV2 PE=1 SV=3	KOG0035	2e-10	Ca2+-binding actin-bundling protein (actinin), alpha chain (EF-Hand protein superfamily)		GO:0017111;GO:0005524	nucleoside-triphosphatase activity|ATP binding
CL25620Contig1	15.5743	27.514	3.63451	0.132097	-2.92033	0.0272834	0.713473	Down
CL25709Contig1	12.1062	24.2123	0	0	#NAME?	0.00171094	0.136744	Down
CL25734Contig1	12.9188	23.1118	2.72588	0.117943	-3.08383	0.0339631	0.786377	Down
CL25752Contig1	9.35477	18.7095	0	0	#NAME?	0.00653703	0.329146	Down	gi|565474928|ref|XP_006295105.1|hypothetical protein CARUB_v10024180mg [Capsella rubella] >gi|482563813|gb|EOA28003.1| hypothetical protein CARUB_v10024180mg [Capsella rubella]	3.54455e-79	sp|P93087|CALM_CAPAN	6e-104	Calmodulin OS=Capsicum annuum GN=CCM1 PE=2 SV=3	KOG0027	6e-104	Calmodulin and related proteins (EF-Hand superfamily)	ko04114, Oocyte meiosis;ko04014, Ras signaling pathway;ko04015, Rap1 signaling pathway;ko04020, Calcium signaling pathway;ko04022, cGMP - PKG signaling pathway;ko04024, cAMP signaling pathway;ko04070, Phosphatidylinositol signaling system;ko05214, Glioma;ko05133, Pertussis;ko05152, Tuberculosis;ko05010, Alzheimer's disease;ko05031, Amphetamine addiction;ko05034, Alcoholism;ko04261, Adrenergic sig…	GO:0005829;GO:0055114;GO:0005509;GO:0008171;GO:0010099;GO:0006084;GO:0005513;GO:0005515;GO:0032440;GO:0009846;GO:0005773;GO:0019722;GO:0005886;GO:0009612	cytosol|oxidation-reduction process|calcium ion binding|O-methyltransferase activity|regulation of photomorphogenesis|acetyl-CoA metabolic process|detection of calcium ion|protein binding|2-alkenal reductase [NAD(P)] activity|pollen germination|vacuole|calcium-mediated signaling|plasma membrane|response to mechanical stimulus
CL25818Contig1	29.6641	48.4247	10.9035	0.225165	-2.15095	0.032173	0.765805	Down
CL25837Contig1	56.8647	94.6482	19.0812	0.201601	-2.31043	0.00900284	0.397564	Down
CL25895Contig1	28.0133	45.123	10.9035	0.24164	-2.04907	0.0436816	0.870587	Down
CL25943Contig1	12.9188	23.1118	2.72588	0.117943	-3.08383	0.0339631	0.786377	Down
CL26020Contig1	11.8183	20.9107	2.72588	0.130359	-2.93944	0.0498951	0.930469	Down
CL26033Contig1	16.5789	28.6146	4.54314	0.15877	-2.65499	0.0358271	0.80068	Down
CL26049Contig1	17.8714	33.0168	2.72588	0.0825604	-3.59841	0.00658147	0.329735	Down
CL26051Contig1	12.6565	25.3129	0	0	#NAME?	0.00132996	0.11506	Down
CL26071Contig1	15.6702	28.6146	2.72588	0.095262	-3.39196	0.0134186	0.490661	Down
CL26137Contig1	3427.62	5036.17	1819.07	0.361202	-1.46912	0.00259977	0.181703	Down	gi|514767906|ref|XP_005024802.1|PREDICTED: collagen alpha-1(VI) chain [Anas platyrhynchos]	0	sp|P20785|CO6A1_CHICK	0	Collagen alpha-1(VI) chain OS=Gallus gallus GN=COL6A1 PE=2 SV=1	KOG3544	0	Collagens (type IV and type XIII), and related proteins	ko04510, Focal adhesion;ko04151, PI3K-Akt signaling pathway;ko04512, ECM-receptor interaction;ko04974, Protein digestion and absorption;	GO:0070208;GO:0042383;GO:0007155;GO:0048407;GO:0071230;GO:0005578;GO:0005581	protein heterotrimerization|sarcolemma|cell adhesion|platelet-derived growth factor binding|cellular response to amino acid stimulus|proteinaceous extracellular matrix|collagen trimer
CL26159Contig1	25.3833	46.2236	4.54314	0.0982862	-3.34687	0.00332898	0.210574	Down
CL26164Contig1	18.5176	35.2179	1.81726	0.0516003	-4.27648	0.00216711	0.15976	Down	gi|449283407|gb|EMC90057.1|hypothetical protein A306_00863, partial [Columba livia]	3.6713e-06	sp|P35074|RPB1_CAEBR	9e-07	DNA-directed RNA polymerase II subunit RPB1 OS=Caenorhabditis briggsae GN=rpb-1 PE=3 SV=2	KOG0260	4e-07	RNA polymerase II, large subunit
CL26193Contig1	19.1383	31.9163	6.36039	0.199284	-2.3271	0.0470303	0.903136	Down
CL26199Contig1	15.4783	26.4135	4.54314	0.172001	-2.53951	0.0492366	0.924655	Down
CL26216Contig1	11.8183	20.9107	2.72588	0.130359	-2.93944	0.0498951	0.930469	Down
CL26271Contig1	2292.79	3067.26	1518.32	0.495007	-1.01448	0.039879	0.841557	Down	gi|543727141|ref|XP_005504677.1|PREDICTED: nucleolar protein 6 [Columba livia]	0	sp|Q5M7P5|NOL6_XENTR	0	Nucleolar protein 6 OS=Xenopus tropicalis GN=nol6 PE=2 SV=1	KOG2054	0	Nucleolar RNA-associated protein (NRAP)	ko03008, Ribosome biogenesis in eukaryotes;	GO:0005730;GO:0003723;GO:0000794	nucleolus|RNA binding|condensed nuclear chromosome
CL26284Contig1	11.8183	20.9107	2.72588	0.130359	-2.93944	0.0498951	0.930469	Down	gi|45382209|ref|NP_990755.1|anosmin-1 precursor [Gallus gallus] >gi|406511|gb|AAA51435.1| KAL [Gallus gallus]	1.3715e-101	sp|P33005|KALM_CHICK	9e-127	Anosmin-1 OS=Gallus gallus GN=KAL1 PE=2 SV=2	KOG4802	2e-111	Adhesion-type protein		GO:0010466;GO:0005576;GO:0009986;GO:0007155;GO:0004867	negative regulation of peptidase activity|extracellular region|cell surface|cell adhesion|serine-type endopeptidase inhibitor activity
CL26286Contig1	23.7325	42.9219	4.54314	0.105847	-3.23995	0.00506323	0.282012	Down
CL26340Contig1	17.5835	29.7151	5.45177	0.183468	-2.4464	0.044785	0.883792	Down
CL26364Contig1	898.075	1447.24	348.913	0.241089	-2.05236	0.000265532	0.0362326	Down	gi|45382725|ref|NP_990812.1|protein-lysine 6-oxidase precursor [Gallus gallus] >gi|462560|sp|Q05063.1|LYOX_CHICK RecName: Full=Protein-lysine 6-oxidase; AltName: Full=Lysyl oxidase; Flags: Precursor >gi|212269|gb|AAA48942.1| lysyl oxidase [Gallus gallus]	8.98322e-138	sp|Q05063|LYOX_CHICK	5e-162	Protein-lysine 6-oxidase OS=Gallus gallus GN=LOX PE=2 SV=1					GO:0005615;GO:0005507;GO:0004720;GO:0048251;GO:0001568;GO:0030199;GO:0030324;GO:0005578;GO:0005581;GO:0055114	extracellular space|copper ion binding|protein-lysine 6-oxidase activity|elastic fiber assembly|blood vessel development|collagen fibril organization|lung development|proteinaceous extracellular matrix|collagen trimer|oxidation-reduction process
CL26433Contig1	24.4492	40.7208	8.17765	0.200823	-2.31601	0.0310708	0.75756	Down
CL26438Contig1	11.364	20.9107	1.81726	0.0869057	-3.52441	0.0283306	0.715742	Down
CL26452Contig1	364.442	527.169	201.715	0.382639	-1.38594	0.0288465	0.722571	Down	gi|483505363|gb|EOA96974.1|Synaptojanin-2, partial [Anas platyrhynchos]	0	sp|O15056|SYNJ2_HUMAN	0	Synaptojanin-2 OS=Homo sapiens GN=SYNJ2 PE=1 SV=3	KOG0566	0	Inositol-1,4,5-triphosphate 5-phosphatase (synaptojanin), INP51/INP52/INP53 family	ko04070, Phosphatidylinositol signaling system;ko00562, Inositol phosphate metabolism;	GO:0003676;GO:0046856;GO:0004439;GO:0000166	nucleic acid binding|phosphatidylinositol dephosphorylation|phosphatidylinositol-4,5-bisphosphate 5-phosphatase activity|nucleotide binding
CL26496Contig1	16.5789	28.6146	4.54314	0.15877	-2.65499	0.0358271	0.80068	Down
CL2657Contig1	37.4385	59.4303	15.4467	0.259912	-1.9439	0.0382504	0.826682	Down	gi|483516421|gb|EOB03291.1|hypothetical protein Anapl_00667 [Anas platyrhynchos]	6.65767e-30
CL26594Contig1	20.4308	36.3185	4.54314	0.125092	-2.99894	0.0121652	0.461858	Down
CL2665Contig1	2877.05	3932.3	1821.8	0.46329	-1.11001	0.022771	0.648598	Down	gi|527271689|ref|XP_005153712.1|PREDICTED: cyclin-dependent kinase 1 isoform X1 [Melopsittacus undulatus]	7.5526e-169	sp|P13863|CDK1_CHICK	0	Cyclin-dependent kinase 1 OS=Gallus gallus GN=CDK1 PE=1 SV=1	KOG0594	0	Protein kinase PCTAIRE and related kinases	ko04110, Cell cycle;ko04114, Oocyte meiosis;ko04115, p53 signaling pathway;ko04540, Gap junction;ko05203, Viral carcinogenesis;ko05168, Herpes simplex infection;ko05169, Epstein-Barr virus infection;ko04914, Progesterone-mediated oocyte maturation;	GO:0048011;GO:0006461;GO:0045995;GO:0009636;GO:0055015;GO:0007095;GO:0007067;GO:0006915;GO:0034138;GO:0007411;GO:0034142;GO:0007077;GO:0030496;GO:0000186;GO:0008353;GO:0060045;GO:0005829;GO:0000083;GO:0014070;GO:0034162;GO:0005654;GO:0031100;GO:0031145;GO:0045471;GO:0034166;GO:0007569;GO:0016477;GO:0070301;GO:0007344;GO:0014075;GO:0045740;GO:0034501;GO:0030261;GO:0038124;GO:0034146;GO:0045087;GO:…	neurotrophin TRK receptor signaling pathway|protein complex assembly|regulation of embryonic development|response to toxic substance|ventricular cardiac muscle cell development|mitotic G2 DNA damage checkpoint|mitotic nuclear division|apoptotic process|toll-like receptor 3 signaling pathway|axon guidance|toll-like receptor 4 signaling pathway|mitotic nuclear envelope disassembly|midbody|activatio…
CL26665Contig1	2561.71	3431.55	1691.86	0.493032	-1.02025	0.0372968	0.813068	Down	gi|514722034|ref|XP_005014119.1|PREDICTED: DNA replication licensing factor MCM3 [Anas platyrhynchos]	0	sp|Q5ZMN2|MCM3_CHICK	0	DNA replication licensing factor MCM3 OS=Gallus gallus GN=MCM3 PE=2 SV=1	KOG0482	0	DNA replication licensing factor, MCM7 component	ko04110, Cell cycle;ko04111, Cell cycle - yeast;ko04113, Meiosis - yeast;ko03030, DNA replication;	GO:0000785;GO:0006268;GO:0030174;GO:0046872;GO:0005813;GO:0003677;GO:0042555;GO:0048471;GO:0016887;GO:0003682;GO:0006200;GO:0006270;GO:0005634;GO:0005524;GO:0003678;GO:0007049	chromatin|DNA unwinding involved in DNA replication|regulation of DNA-dependent DNA replication initiation|metal ion binding|centrosome|DNA binding|MCM complex|perinuclear region of cytoplasm|ATPase activity|chromatin binding|ATP catabolic process|DNA replication initiation|nucleus|ATP binding|DNA helicase activity|cell cycle
CL26748Contig1	23.4701	45.123	1.81726	0.0402734	-4.63403	0.000455264	0.0538099	Down
CL26803Contig1	12.3686	22.0112	2.72588	0.123841	-3.01344	0.0411285	0.848713	Down
CL26832Contig1	11.5559	23.1118	0	0	#NAME?	0.0022126	0.160484	Down
CL26880Contig1	18.3257	33.0168	3.63451	0.110081	-3.18337	0.0118389	0.452616	Down
CL2691Contig1	153.535	249.827	57.2435	0.229132	-2.12575	0.00471183	0.271448	Down
CL26933Contig1	3935.71	5444.47	2426.94	0.445763	-1.16565	0.0156887	0.531521	Down	gi|543351466|ref|XP_005520691.1|PREDICTED: kinesin-like protein KIF11 [Pseudopodoces humilis]	0	sp|P52732|KIF11_HUMAN	0	Kinesin-like protein KIF11 OS=Homo sapiens GN=KIF11 PE=1 SV=2	KOG0243	0	Kinesin-like protein		GO:0003777;GO:0008017;GO:0000922;GO:0090307;GO:0005876;GO:0007100;GO:0005524;GO:0007018;GO:0005871;GO:0019901;GO:0005737	microtubule motor activity|microtubule binding|spindle pole|spindle assembly involved in mitosis|spindle microtubule|mitotic centrosome separation|ATP binding|microtubule-based movement|kinesin complex|protein kinase binding|cytoplasm
CL26987Contig1	15.4783	26.4135	4.54314	0.172001	-2.53951	0.0492366	0.924655	Down
CL2698Contig1	90.6176	143.073	38.1624	0.266734	-1.90653	0.0181571	0.583799	Down	gi|541958217|ref|XP_005434862.1|PREDICTED: nestin-like [Falco cherrug]	1.12735e-47
CL26999Contig1	14.0194	25.3129	2.72588	0.107687	-3.21508	0.0232928	0.652289	Down
CL27056Contig1	56.2889	88.0449	24.5329	0.278641	-1.84352	0.0336859	0.784995	Down
CL27091Contig1	75.3823	129.866	20.8984	0.160923	-2.63556	0.0021953	0.160484	Down	gi|483501551|gb|EOA95171.1|hypothetical protein Anapl_17877 [Anas platyrhynchos]	8.94508e-08
CL27230Contig1	10.2634	18.7095	1.81726	0.0971299	-3.36394	0.0436618	0.870587	Down	gi|326922871|ref|XP_003207667.1|PREDICTED: transmembrane protein 198-B-like [Meleagris gallopavo]	7.0452e-55	sp|Q498W5|T198B_DANRE	1e-44	Transmembrane protein 198-B OS=Danio rerio GN=tmem198b PE=2 SV=1					GO:0016023;GO:0005886;GO:0090263	cytoplasmic membrane-bounded vesicle|plasma membrane|positive regulation of canonical Wnt signaling pathway
CL27248Contig1	15.5743	27.514	3.63451	0.132097	-2.92033	0.0272834	0.713473	Down	gi|513159945|ref|XP_004937937.1|PREDICTED: E3 ubiquitin-protein ligase ICP0-like [Gallus gallus]	9.72458e-36	sp|Q80Z37|TOPRS_MOUSE	1e-12	E3 ubiquitin-protein ligase Topors OS=Mus musculus GN=Topors PE=1 SV=1	KOG4430	9e-09	Topoisomerase I-binding arginine-serine-rich protein
CL27254Contig1	19.4262	35.2179	3.63451	0.103201	-3.27648	0.00856033	0.38733	Down
CL27299Contig1	30.1184	48.4247	11.8122	0.243928	-2.03547	0.0406576	0.847681	Down	gi|513201729|ref|XP_004943913.1|PREDICTED: ectoderm-neural cortex protein 2 isoform X2 [Gallus gallus] >gi|513201732|ref|XP_001233011.2| PREDICTED: ectoderm-neural cortex protein 2 isoformX1 [Gallus gallus]	5.88157e-54	sp|Q9H0H3|KLH25_HUMAN	1e-58	Kelch-like protein 25 OS=Homo sapiens GN=KLHL25 PE=1 SV=1	KOG4441	3e-59	Proteins containing BTB/POZ and Kelch domains, involved in regulatory/signal transduction processes		GO:0005737	cytoplasm
CL27302Contig1	38.2767	63.8325	12.7208	0.199284	-2.3271	0.0143839	0.502946	Down
CL27334Contig1	10.3594	19.8101	0.908628	0.0458669	-4.4464	0.0165122	0.546618	Down
CL27365Contig1	48.3481	80.3409	16.3553	0.203574	-2.29638	0.0114087	0.444614	Down
CL27373Contig1	88.1602	161.782	14.538	0.0898617	-3.47615	7.96919e-05	0.0148065	Down	gi|514786941|ref|XP_005029144.1|PREDICTED: arrestin domain-containing protein 2-like isoform X1 [Anas platyrhynchos]	3.19933e-15								GO:0016607;GO:0008023;GO:0006368;GO:0019902;GO:0007165;GO:0010923;GO:0001701	nuclear speck|transcription elongation factor complex|transcription elongation from RNA polymerase II promoter|phosphatase binding|signal transduction|negative regulation of phosphatase activity|in utero embryonic development
[truncated: 765 more rows]

## Sheet: Table 3
Table S3. KEGG pathways enriched with up-regulated unigenes
Pathway ID	Term	ListHits	ListTotal	p	FDR
ko04060	Cytokine-cytokine receptor interaction	11	87	7.58261e-06	0.00121322
ko04151	PI3K-Akt signaling pathway	7	87	0.0718467	0.185411
ko04064	NF-kappa B signaling pathway	6	87	0.000564022	0.028294
ko05162	Measles	6	87	0.0014147	0.028294
ko04514	Cell adhesion molecules (CAMs)	6	87	0.00227606	0.0391612
[truncated: 155 more rows]

[truncated: 2 more sheets: Table S4, Table S5]
